# Supplementary material for: Distinct cell type-specific protein signatures in GRN and MAPT genetic subtypes of frontotemporal dementia
Source: Acta Neuropathol Commun. 2022 Jul 7;10:100. doi: 10.1186/s40478-022-01387-8 (PMC9261008; doi:10.1186/s40478-022-01387-8)
Supplement: Supplementary file 3 — Additional file 3 Lists of unique proteins detected and quantified within frontal and temporal cortical tissues for the RiMOD-FTD genetic subtypes. Proteins were selected using quality filtering on peptide level (q ≤10-3 in at least 50% of samples per group, i.e. NDC or FTD). For every protein, the raw fold change, raw p-value, multiple comparison corrected q-value, and effect size (d) are given for the statistical comparison between NDC and FTD subtype. In addition, columns are included which note whether a protein has passed statistical testing (either p < 0.05 or q < 0.05). Furthermore, the differential expression of several well-known neurodegeneration (ND)-related proteins in frontal cortical FTD-GRN vs NDC and temporal cortical FTD-MAPT vs NDC are highlighted. -; not detected within study cohort. [file 40478_2022_1387_MOESM3_ESM.xlsx]

## Sheet: Info
Distinct cell type-specific protein signatures in GRN and MAPT genetic subtypes of frontotemporal dementia
Additional Data File 3 Lists of unique proteins detected and quantified within frontal and temporal cortical tissues for the RiMOD-FTD genetic subtypes using quality filtering on peptide level (q ≤10-3 in at least 50% of samples per group, i.e. NDC or FTD). For every protein, the raw fold change, raw p-value, multiple comparison corrected q-value, and effect size (d) are given for the statistical…

## Sheet: frontal NDC vs FTD-GRN
UniProt_accession	UniProt_fasta_header	UniProt_gene_symbol	foldchange_FTDvsNDC	p_value_SAM	Significant? p < 0.05	q_value_SAM	Significant? q < 0.05	Effect_size(d)
A0A0A0MR40;Q6H8Q1;Q6H8Q1-2;Q6H8Q1-3;Q6H8Q1-4;Q6H8Q	NA	ABLIM2	0.505234	8.33333e-07	Yes	0.000109945	Yes	-5.75541
P21291	>sp|P21291|CSRP1_HUMAN Cysteine and glycine-rich protein 1 OS=Homo sapiens (Human) OX=9606 GN=CSRP1 PE=1 SV=3	CSRP1	3.33631	8.33333e-07	Yes	0.000109945	Yes	5.84737
P04080	>sp|P04080|CYTB_HUMAN Cystatin-B OS=Homo sapiens (Human) OX=9606 GN=CSTB PE=1 SV=2	CSTB	2.39663	8.33333e-07	Yes	0.000109945	Yes	6.77684
Q13642-1;Q13642-4;Q13642-5	>sp|Q13642-1|FHL1-1_HUMAN Isoform of Q13642, Isoform 1 of Four and a half LIM domains protein 1 OS=Homo sapiens (Human) OX=9606 GN=FHL1 PE=1 SV=4;>sp|Q13642-4|FHL1-4_HUMAN Isoform of Q13642, Isoform 4 of Four and a half LIM domains protein 1 OS=Homo sapiens (Human) OX=9606 GN=FHL1 PE=1 SV=4;>sp|Q13642-5|FHL1-5_HUMAN Isoform of Q13642, Isoform 5 of Four and a half LIM domains protein 1 OS=Homo sap…	FHL1	2.53672	4.16667e-07	Yes	0.000109945	Yes	7.21832
P14136	>sp|P14136|GFAP_HUMAN Glial fibrillary acidic protein OS=Homo sapiens (Human) OX=9606 GN=GFAP PE=1 SV=1	GFAP	6.43876	8.33333e-07	Yes	0.000109945	Yes	6.07694
Q14CZ8	>sp|Q14CZ8|HECAM_HUMAN Hepatocyte cell adhesion molecule OS=Homo sapiens (Human) OX=9606 GN=HEPACAM PE=1 SV=1	HEPACAM	2.7983	8.33333e-07	Yes	0.000109945	Yes	5.5313
E9PGC8;P78559;P78559-2	>tr|E9PGC8|E9PGC8_HUMAN Isoform of P78559, Microtubule-associated protein 1A OS=Homo sapiens (Human) OX=9606 GN=MAP1A PE=1 SV=1;>sp|P78559|MAP1A_HUMAN Microtubule-associated protein 1A OS=Homo sapiens (Human) OX=9606 GN=MAP1A PE=1 SV=6;>sp|P78559-2|MAP1A-2_HUMAN Isoform of P78559, Isoform 2 of Microtubule-associated protein 1A OS=Homo sapiens (Human) OX=9606 GN=MAP1A PE=1 SV=6	MAP1A	0.432181	8.33333e-07	Yes	0.000109945	Yes	-5.83941
P46821	>sp|P46821|MAP1B_HUMAN Microtubule-associated protein 1B OS=Homo sapiens (Human) OX=9606 GN=MAP1B PE=1 SV=2	MAP1B	0.626585	8.33333e-07	Yes	0.000109945	Yes	-5.7684
Q5SRE7;Q5SRE7-2	>sp|Q5SRE7|PHYD1_HUMAN Phytanoyl-CoA dioxygenase domain-containing protein 1 OS=Homo sapiens (Human) OX=9606 GN=PHYHD1 PE=1 SV=2;>sp|Q5SRE7-2|PHYD1-2_HUMAN Isoform of Q5SRE7, Isoform 2 of Phytanoyl-CoA dioxygenase domain-containing protein 1 OS=Homo sapiens (Human) OX=9606 GN=PHYHD1 PE=1 SV=2	PHYHD1	7.43439	8.33333e-07	Yes	0.000109945	Yes	5.60895
E9PHN6;F6XZQ7;P28161;P28161-2	>tr|E9PHN6|E9PHN6_HUMAN Isoform of P28161, Glutathione S-transferase OS=Homo sapiens (Human) OX=9606 GN=GSTM2 PE=1 SV=1;>tr|F6XZQ7|F6XZQ7_HUMAN Isoform of P28161, Glutathione S-transferase OS=Homo sapiens (Human) OX=9606 GN=GSTM2 PE=1 SV=1;>sp|P28161|GSTM2_HUMAN Glutathione S-transferase Mu 2 OS=Homo sapiens (Human) OX=9606 GN=GSTM2 PE=1 SV=2;>sp|P28161-2|GSTM2-2_HUMAN Isoform of P28161, Isoform …	GSTM2	2.90356	1.25e-06	Yes	0.000148426	Yes	5.45436
E9PHR9;Q9NRQ2;Q9NRQ2-2	>tr|E9PHR9|E9PHR9_HUMAN Isoform of Q9NRQ2, Phospholipid scramblase OS=Homo sapiens (Human) OX=9606 GN=PLSCR4 PE=1 SV=1;>sp|Q9NRQ2|PLS4_HUMAN Phospholipid scramblase 4 OS=Homo sapiens (Human) OX=9606 GN=PLSCR4 PE=1 SV=2;>sp|Q9NRQ2-2|PLS4-2_HUMAN Isoform of Q9NRQ2, Isoform 2 of Phospholipid scramblase 4 OS=Homo sapiens (Human) OX=9606 GN=PLSCR4 PE=1 SV=2	PLSCR4	3.23243	1.66667e-06	Yes	0.00017991	Yes	5.3902
Q13228;Q13228-4	>sp|Q13228|SBP1_HUMAN Methanethiol oxidase OS=Homo sapiens (Human) OX=9606 GN=SELENBP1 PE=1 SV=2;>sp|Q13228-4|SBP1-4_HUMAN Isoform of Q13228, Isoform 4 of Methanethiol oxidase OS=Homo sapiens (Human) OX=9606 GN=SELENBP1 PE=1 SV=2	SELENBP1	2.41775	2.08333e-06	Yes	0.000206147	Yes	5.35434
P11766	>sp|P11766|ADHX_HUMAN Alcohol dehydrogenase class-3 OS=Homo sapiens (Human) OX=9606 GN=ADH5 PE=1 SV=4	ADH5	1.96886	4.16667e-06	Yes	0.000329836	Yes	5.091
E7ESS4;P05362	>tr|E7ESS4|E7ESS4_HUMAN Isoform of P05362, Intercellular adhesion molecule 1 OS=Homo sapiens (Human) OX=9606 GN=ICAM1 PE=1 SV=1;>sp|P05362|ICAM1_HUMAN Intercellular adhesion molecule 1 OS=Homo sapiens (Human) OX=9606 GN=ICAM1 PE=1 SV=2	ICAM1	6.80273	4.16667e-06	Yes	0.000329836	Yes	5.06865
Q8N3V7-2;Q8N3V7-3	>sp|Q8N3V7-2|SYNPO-2_HUMAN Isoform of Q8N3V7, Isoform 2 of Synaptopodin OS=Homo sapiens (Human) OX=9606 GN=SYNPO PE=1 SV=2;>sp|Q8N3V7-3|SYNPO-3_HUMAN Isoform of Q8N3V7, Isoform 3 of Synaptopodin OS=Homo sapiens (Human) OX=9606 GN=SYNPO PE=1 SV=2	SYNPO	0.378053	4.16667e-06	Yes	0.000329836	Yes	-5.07291
Q7Z6L0;Q7Z6L0-2	>sp|Q7Z6L0|PRRT2_HUMAN Proline-rich transmembrane protein 2 OS=Homo sapiens (Human) OX=9606 GN=PRRT2 PE=1 SV=1;>sp|Q7Z6L0-2|PRRT2-2_HUMAN Isoform of Q7Z6L0, Isoform 2 of Proline-rich transmembrane protein 2 OS=Homo sapiens (Human) OX=9606 GN=PRRT2 PE=1 SV=1	PRRT2	0.576913	5e-06	Yes	0.000349238	Yes	-4.99251
Q68CZ2;Q68CZ2-2	>sp|Q68CZ2|TENS3_HUMAN Tensin-3 OS=Homo sapiens (Human) OX=9606 GN=TNS3 PE=1 SV=2;>sp|Q68CZ2-2|TENS3-2_HUMAN Isoform of Q68CZ2, Isoform 2 of Tensin-3 OS=Homo sapiens (Human) OX=9606 GN=TNS3 PE=1 SV=2	TNS3	2.31296	5e-06	Yes	0.000349238	Yes	5.03181
P49189	>sp|P49189|AL9A1_HUMAN 4-trimethylaminobutyraldehyde dehydrogenase OS=Homo sapiens (Human) OX=9606 GN=ALDH9A1 PE=1 SV=3	ALDH9A1	2.01743	6.66667e-06	Yes	0.000376955	Yes	4.92345
J3KQR7;Q9Y4F5;Q9Y4F5-2;Q9Y4F5-3	>tr|J3KQR7|J3KQR7_HUMAN Isoform of Q9Y4F5, FHA domain-containing protein OS=Homo sapiens (Human) OX=9606 GN=CEP170B PE=1 SV=1;>sp|Q9Y4F5|C170B_HUMAN Centrosomal protein of 170 kDa protein B OS=Homo sapiens (Human) OX=9606 GN=CEP170B PE=1 SV=4;>sp|Q9Y4F5-2|C170B-2_HUMAN Isoform of Q9Y4F5, Isoform 2 of Centrosomal protein of 170 kDa protein B OS=Homo sapiens (Human) OX=9606 GN=CEP170B PE=1 SV=4;>sp…	CEP170B	0.493559	6.66667e-06	Yes	0.000376955	Yes	-4.91358
Q16352	>sp|Q16352|AINX_HUMAN Alpha-internexin OS=Homo sapiens (Human) OX=9606 GN=INA PE=1 SV=2	INA	0.506908	6.25e-06	Yes	0.000376955	Yes	-4.93184
P35241;P35241-5	>sp|P35241|RADI_HUMAN Radixin OS=Homo sapiens (Human) OX=9606 GN=RDX PE=1 SV=1;>sp|P35241-5|RADI-5_HUMAN Isoform of P35241, Isoform 5 of Radixin OS=Homo sapiens (Human) OX=9606 GN=RDX PE=1 SV=1	RDX	2.30179	6.66667e-06	Yes	0.000376955	Yes	4.90033
Q53TN4;Q53TN4-3	>sp|Q53TN4|CYBR1_HUMAN Cytochrome b reductase 1 OS=Homo sapiens (Human) OX=9606 GN=CYBRD1 PE=1 SV=1;>sp|Q53TN4-3|CYBR1-3_HUMAN Isoform of Q53TN4, Isoform 3 of Cytochrome b reductase 1 OS=Homo sapiens (Human) OX=9606 GN=CYBRD1 PE=1 SV=1	CYBRD1	2.66234	8.75e-06	Yes	0.000472265	Yes	4.77496
Q15120;Q15120-2	>sp|Q15120|PDK3_HUMAN [Pyruvate dehydrogenase (acetyl-transferring)] kinase isozyme 3, mitochondrial OS=Homo sapiens (Human) OX=9606 GN=PDK3 PE=1 SV=1;>sp|Q15120-2|PDK3-2_HUMAN Isoform of Q15120, Isoform 2 of [Pyruvate dehydrogenase (acetyl-transferring)] kinase isozyme 3, mitochondrial OS=Homo sapiens (Human) OX=9606 GN=PDK3 PE=1 SV=1	PDK3	0.553986	9.16667e-06	Yes	0.000473243	Yes	-4.75942
A0A0A0MRA8	>tr|A0A0A0MRA8|A0A0A0MRA8_HUMAN Isoform of Q9Y2J2, FERM domain-containing protein OS=Homo sapiens (Human) OX=9606 GN=EPB41L3 PE=1 SV=1	EPB41L3	0.60203	9.58333e-06	Yes	0.000474139	Yes	-4.75047
Q96RR4;Q96RR4-2;Q96RR4-3;Q96RR4-4;Q96RR4-5;Q96RR4-	NA	CAMKK2	0.483805	1.125e-05	Yes	0.000528875	Yes	-4.70383
E7EQR4;P15311	>tr|E7EQR4|E7EQR4_HUMAN Isoform of P15311, FERM domain-containing protein OS=Homo sapiens (Human) OX=9606 GN=EZR PE=1 SV=3;>sp|P15311|EZRI_HUMAN Ezrin OS=Homo sapiens (Human) OX=9606 GN=EZR PE=1 SV=4	EZR	2.53002	1.25e-05	Yes	0.000528875	Yes	4.66754
Q5JVS0	>sp|Q5JVS0|HABP4_HUMAN Intracellular hyaluronan-binding protein 4 OS=Homo sapiens (Human) OX=9606 GN=HABP4 PE=1 SV=1	HABP4	0.302785	1.29167e-05	Yes	0.000528875	Yes	-4.64653
M0R389;Q15102	>tr|M0R389|M0R389_HUMAN Isoform of Q15102, SGNH_hydro domain-containing protein (Fragment) OS=Homo sapiens (Human) OX=9606 GN=PAFAH1B3 PE=1 SV=8;>sp|Q15102|PA1B3_HUMAN Platelet-activating factor acetylhydrolase IB subunit gamma OS=Homo sapiens (Human) OX=9606 GN=PAFAH1B3 PE=1 SV=1	PAFAH1B3	2.44476	1.29167e-05	Yes	0.000528875	Yes	4.64683
A0A0A0MSE0;P49802;P49802-2;P49802-3;P49802-4;P4980	NA	RGS7	0.564961	1.25e-05	Yes	0.000528875	Yes	-4.6721
Q15417;Q15417-3	>sp|Q15417|CNN3_HUMAN Calponin-3 OS=Homo sapiens (Human) OX=9606 GN=CNN3 PE=1 SV=1;>sp|Q15417-3|CNN3-3_HUMAN Isoform of Q15417, Isoform 3 of Calponin-3 OS=Homo sapiens (Human) OX=9606 GN=CNN3 PE=1 SV=1	CNN3	2.38814	1.41667e-05	Yes	0.000558593	Yes	4.62443
P11217	>sp|P11217|PYGM_HUMAN Glycogen phosphorylase, muscle form OS=Homo sapiens (Human) OX=9606 GN=PYGM PE=1 SV=6	PYGM	2.0452	1.45833e-05	Yes	0.000558593	Yes	4.61901
O76070	>sp|O76070|SYUG_HUMAN Gamma-synuclein OS=Homo sapiens (Human) OX=9606 GN=SNCG PE=1 SV=2	SNCG	0.31332	1.75e-05	Yes	0.000649364	Yes	-4.57992
P51178	>sp|P51178|PLCD1_HUMAN 1-phosphatidylinositol 4,5-bisphosphate phosphodiesterase delta-1 OS=Homo sapiens (Human) OX=9606 GN=PLCD1 PE=1 SV=2	PLCD1	2.2013	1.83333e-05	Yes	0.000659672	Yes	4.56356
P09211	>sp|P09211|GSTP1_HUMAN Glutathione S-transferase P OS=Homo sapiens (Human) OX=9606 GN=GSTP1 PE=1 SV=2	GSTP1	2.21037	1.95833e-05	Yes	0.000678519	Yes	4.53485
B8ZZD4;Q86VP1;Q86VP1-2;Q86VP1-3;Q86VP1-4	>tr|B8ZZD4|B8ZZD4_HUMAN Isoform of Q86VP1, Tax1-binding protein 1 OS=Homo sapiens (Human) OX=9606 GN=TAX1BP1 PE=1 SV=1;>sp|Q86VP1|TAXB1_HUMAN Tax1-binding protein 1 OS=Homo sapiens (Human) OX=9606 GN=TAX1BP1 PE=1 SV=2;>sp|Q86VP1-2|TAXB1-2_HUMAN Isoform of Q86VP1, Isoform 2 of Tax1-binding protein 1 OS=Homo sapiens (Human) OX=9606 GN=TAX1BP1 PE=1 SV=2;>sp|Q86VP1-3|TAXB1-3_HUMAN Isoform of Q86VP1, …	TAX1BP1	0.391768	2e-05	Yes	0.000678519	Yes	-4.52902
B1AKD8;Q5TZA2;Q5TZA2-2	>tr|B1AKD8|B1AKD8_HUMAN Isoform of Q5TZA2, Rootletin (Fragment) OS=Homo sapiens (Human) OX=9606 GN=CROCC PE=1 SV=2;>sp|Q5TZA2|CROCC_HUMAN Rootletin OS=Homo sapiens (Human) OX=9606 GN=CROCC PE=1 SV=1;>sp|Q5TZA2-2|CROCC-2_HUMAN Isoform of Q5TZA2, Isoform 2 of Rootletin OS=Homo sapiens (Human) OX=9606 GN=CROCC PE=1 SV=1	CROCC	2.26999	2.375e-05	Yes	0.000762188	Yes	4.46102
P21266	>sp|P21266|GSTM3_HUMAN Glutathione S-transferase Mu 3 OS=Homo sapiens (Human) OX=9606 GN=GSTM3 PE=1 SV=3	GSTM3	2.23238	2.375e-05	Yes	0.000762188	Yes	4.47775
Q16566	>sp|Q16566|KCC4_HUMAN Calcium/calmodulin-dependent protein kinase type IV OS=Homo sapiens (Human) OX=9606 GN=CAMK4 PE=1 SV=1	CAMK4	0.456586	3.54167e-05	Yes	0.000858246	Yes	-4.29171
Q96KP4	>sp|Q96KP4|CNDP2_HUMAN Cytosolic non-specific dipeptidase OS=Homo sapiens (Human) OX=9606 GN=CNDP2 PE=1 SV=2	CNDP2	1.96162	3.54167e-05	Yes	0.000858246	Yes	4.28362
Q9Y285	>sp|Q9Y285|SYFA_HUMAN Phenylalanine--tRNA ligase alpha subunit OS=Homo sapiens (Human) OX=9606 GN=FARSA PE=1 SV=3	FARSA	0.445796	3.375e-05	Yes	0.000858246	Yes	-4.31859
E9PQ73;Q8TDW7;Q8TDW7-3	>tr|E9PQ73|E9PQ73_HUMAN Isoform of Q8TDW7, Protocadherin Fat 3 OS=Homo sapiens (Human) OX=9606 GN=FAT3 PE=1 SV=1;>sp|Q8TDW7|FAT3_HUMAN Protocadherin Fat 3 OS=Homo sapiens (Human) OX=9606 GN=FAT3 PE=2 SV=3;>sp|Q8TDW7-3|FAT3_HUMAN Isoform 3 of Protocadherin Fat 3 OS=Homo sapiens GN=FAT3	FAT3	4.15586	3.54167e-05	Yes	0.000858246	Yes	4.27396
P62942	>sp|P62942|FKB1A_HUMAN Peptidyl-prolyl cis-trans isomerase FKBP1A OS=Homo sapiens (Human) OX=9606 GN=FKBP1A PE=1 SV=2	FKBP1A	3.30358	3.45833e-05	Yes	0.000858246	Yes	4.29827
P11137;P11137-3	>sp|P11137|MTAP2_HUMAN Microtubule-associated protein 2 OS=Homo sapiens (Human) OX=9606 GN=MAP2 PE=1 SV=4;>sp|P11137-3|MTAP2-3_HUMAN Isoform of P11137, Isoform 3 of Microtubule-associated protein 2 OS=Homo sapiens (Human) OX=9606 GN=MAP2 PE=1 SV=4	MAP2	0.485416	3.54167e-05	Yes	0.000858246	Yes	-4.29122
Q8N987	>sp|Q8N987|NECA1_HUMAN N-terminal EF-hand calcium-binding protein 1 OS=Homo sapiens (Human) OX=9606 GN=NECAB1 PE=1 SV=1	NECAB1	0.498678	3.375e-05	Yes	0.000858246	Yes	-4.30463
Q15121;Q15121-2	>sp|Q15121|PEA15_HUMAN Astrocytic phosphoprotein PEA-15 OS=Homo sapiens (Human) OX=9606 GN=PEA15 PE=1 SV=2;>sp|Q15121-2|PEA15-2_HUMAN Isoform of Q15121, Isoform 2 of Astrocytic phosphoprotein PEA-15 OS=Homo sapiens (Human) OX=9606 GN=PEA15 PE=1 SV=2	PEA15	2.05365	3.54167e-05	Yes	0.000858246	Yes	4.27166
P00491	>sp|P00491|PNPH_HUMAN Purine nucleoside phosphorylase OS=Homo sapiens (Human) OX=9606 GN=PNP PE=1 SV=2	PNP	2.88244	2.75e-05	Yes	0.000858246	Yes	4.41997
B5MDF5;P62826	>tr|B5MDF5|B5MDF5_HUMAN Isoform of P62826, GTP-binding nuclear protein Ran OS=Homo sapiens (Human) OX=9606 GN=RAN PE=1 SV=1;>sp|P62826|RAN_HUMAN GTP-binding nuclear protein Ran OS=Homo sapiens (Human) OX=9606 GN=RAN PE=1 SV=3	RAN	2.1654	2.83333e-05	Yes	0.000858246	Yes	4.39454
Q96AG3;Q96AG3-3	>sp|Q96AG3|S2546_HUMAN Solute carrier family 25 member 46 OS=Homo sapiens (Human) OX=9606 GN=SLC25A46 PE=1 SV=1;>sp|Q96AG3-3|S2546-3_HUMAN Isoform of Q96AG3, Isoform 3 of Solute carrier family 25 member 46 OS=Homo sapiens (Human) OX=9606 GN=SLC25A46 PE=1 SV=1	SLC25A46	0.593094	3.45833e-05	Yes	0.000858246	Yes	-4.29464
P18206;P18206-2	>sp|P18206|VINC_HUMAN Vinculin OS=Homo sapiens (Human) OX=9606 GN=VCL PE=1 SV=4;>sp|P18206-2|VINC-2_HUMAN Isoform of P18206, Isoform 1 of Vinculin OS=Homo sapiens (Human) OX=9606 GN=VCL PE=1 SV=4	VCL	2.08312	3.08333e-05	Yes	0.000858246	Yes	4.37052
Q2M2I8	>sp|Q2M2I8|AAK1_HUMAN AP2-associated protein kinase 1 OS=Homo sapiens (Human) OX=9606 GN=AAK1 PE=1 SV=3	AAK1	0.582967	3.875e-05	Yes	0.000902198	Yes	-4.23217
Q9NSD9	>sp|Q9NSD9|SYFB_HUMAN Phenylalanine--tRNA ligase beta subunit OS=Homo sapiens (Human) OX=9606 GN=FARSB PE=1 SV=3	FARSB	0.531437	3.875e-05	Yes	0.000902198	Yes	-4.22663
O43175	>sp|O43175|SERA_HUMAN D-3-phosphoglycerate dehydrogenase OS=Homo sapiens (Human) OX=9606 GN=PHGDH PE=1 SV=4	PHGDH	2.11339	4.20833e-05	Yes	0.000960964	Yes	4.19702
H0Y2P0;H0Y5E4;H0YCV9;H0YD13;H0YD17;H0YDW7;H0YDX6;P	NA	CD44	6.71761	5.20833e-05	Yes	0.00114526	Yes	4.13041
Q6ZVL6	>sp|Q6ZVL6|K154L_HUMAN UPF0606 protein KIAA1549L OS=Homo sapiens (Human) OX=9606 GN=KIAA1549L PE=2 SV=2	KIAA1549L	0.639139	5.20833e-05	Yes	0.00114526	Yes	-4.13091
F5GZV7;P23763;P23763-2;P23763-3	>tr|F5GZV7|F5GZV7_HUMAN Isoform of P23763, V-SNARE coiled-coil homology domain-containing protein OS=Homo sapiens (Human) OX=9606 GN=VAMP1 PE=1 SV=1;>sp|P23763|VAMP1_HUMAN Vesicle-associated membrane protein 1 OS=Homo sapiens (Human) OX=9606 GN=VAMP1 PE=1 SV=1;>sp|P23763-2|VAMP1-2_HUMAN Isoform of P23763, Isoform 3 of Vesicle-associated membrane protein 1 OS=Homo sapiens (Human) OX=9606 GN=VAMP1 …	VAMP1	0.498465	5.33333e-05	Yes	0.00115143	Yes	-4.12573
Q96AQ6;Q96AQ6-2;Q96AQ6-3	>sp|Q96AQ6|PBIP1_HUMAN Pre-B-cell leukemia transcription factor-interacting protein 1 OS=Homo sapiens (Human) OX=9606 GN=PBXIP1 PE=1 SV=1;>sp|Q96AQ6-2|PBIP1-2_HUMAN Isoform of Q96AQ6, Isoform 2 of Pre-B-cell leukemia transcription factor-interacting protein 1 OS=Homo sapiens (Human) OX=9606 GN=PBXIP1 PE=1 SV=1;>sp|Q96AQ6-3|PBIP1-3_HUMAN Isoform of Q96AQ6, Isoform 3 of Pre-B-cell leukemia transcri…	PBXIP1	2.01048	5.91667e-05	Yes	0.00125455	Yes	4.09613
P10412	>sp|P10412|H14_HUMAN Histone H1.4 OS=Homo sapiens (Human) OX=9606 GN=H1-4 PE=1 SV=2	H1-4	1.86465	6.29167e-05	Yes	0.00131066	Yes	4.07136
P11279	>sp|P11279|LAMP1_HUMAN Lysosome-associated membrane glycoprotein 1 OS=Homo sapiens (Human) OX=9606 GN=LAMP1 PE=1 SV=3	LAMP1	1.79131	6.83333e-05	Yes	0.00135233	Yes	4.0487
Q02156	>sp|Q02156|KPCE_HUMAN Protein kinase C epsilon type OS=Homo sapiens (Human) OX=9606 GN=PRKCE PE=1 SV=1	PRKCE	0.607814	6.70833e-05	Yes	0.00135233	Yes	-4.05263
D6RFW1;Q96EQ0	>tr|D6RFW1|D6RFW1_HUMAN Isoform of Q96EQ0, TPR_REGION domain-containing protein (Fragment) OS=Homo sapiens (Human) OX=9606 GN=SGTB PE=1 SV=1;>sp|Q96EQ0|SGTB_HUMAN Small glutamine-rich tetratricopeptide repeat-containing protein beta OS=Homo sapiens (Human) OX=9606 GN=SGTB PE=1 SV=1	SGTB	0.48926	6.83333e-05	Yes	0.00135233	Yes	-4.04877
Q9Y617	>sp|Q9Y617|SERC_HUMAN Phosphoserine aminotransferase OS=Homo sapiens (Human) OX=9606 GN=PSAT1 PE=1 SV=2	PSAT1	1.94209	7e-05	Yes	0.0013626	Yes	4.03676
P16152	>sp|P16152|CBR1_HUMAN Carbonyl reductase [NADPH] 1 OS=Homo sapiens (Human) OX=9606 GN=CBR1 PE=1 SV=3	CBR1	2.92351	7.33333e-05	Yes	0.00137182	Yes	4.02576
P16389	>sp|P16389|KCNA2_HUMAN Potassium voltage-gated channel subfamily A member 2 OS=Homo sapiens (Human) OX=9606 GN=KCNA2 PE=1 SV=2	KCNA2	0.493519	7.41667e-05	Yes	0.00137182	Yes	-4.02188
Q9UNW9	>sp|Q9UNW9|NOVA2_HUMAN RNA-binding protein Nova-2 OS=Homo sapiens (Human) OX=9606 GN=NOVA2 PE=1 SV=1	NOVA2	0.495306	7.625e-05	Yes	0.00137182	Yes	-4.01652
P43003;P43003-2	>sp|P43003|EAA1_HUMAN Excitatory amino acid transporter 1 OS=Homo sapiens (Human) OX=9606 GN=SLC1A3 PE=1 SV=1;>sp|P43003-2|EAA1-2_HUMAN Isoform of P43003, Isoform 2 of Excitatory amino acid transporter 1 OS=Homo sapiens (Human) OX=9606 GN=SLC1A3 PE=1 SV=1	SLC1A3	1.8554	7.33333e-05	Yes	0.00137182	Yes	4.02496
P55327-4;P55327-5;P55327-6	>sp|P55327-4|TPD52-4_HUMAN Isoform of P55327, Isoform 4 of Tumor protein D52 OS=Homo sapiens (Human) OX=9606 GN=TPD52 PE=1 SV=2;>sp|P55327-5|TPD52-5_HUMAN Isoform of P55327, Isoform 5 of Tumor protein D52 OS=Homo sapiens (Human) OX=9606 GN=TPD52 PE=1 SV=2;>sp|P55327-6|TPD52-6_HUMAN Isoform of P55327, Isoform 6 of Tumor protein D52 OS=Homo sapiens (Human) OX=9606 GN=TPD52 PE=1 SV=2	TPD52	0.589852	7.54167e-05	Yes	0.00137182	Yes	-4.0176
P05556;P05556-2;P05556-3;P05556-4;P05556-5	>sp|P05556|ITB1_HUMAN Integrin beta-1 OS=Homo sapiens (Human) OX=9606 GN=ITGB1 PE=1 SV=2;>sp|P05556-2|ITB1-2_HUMAN Isoform of P05556, Isoform 2 of Integrin beta-1 OS=Homo sapiens (Human) OX=9606 GN=ITGB1 PE=1 SV=2;>sp|P05556-3|ITB1-3_HUMAN Isoform of P05556, Isoform 3 of Integrin beta-1 OS=Homo sapiens (Human) OX=9606 GN=ITGB1 PE=1 SV=2;>sp|P05556-4|ITB1-4_HUMAN Isoform of P05556, Isoform 4 of In…	ITGB1	2.50544	8.125e-05	Yes	0.00139822	Yes	3.98539
P62937	>sp|P62937|PPIA_HUMAN Peptidyl-prolyl cis-trans isomerase A OS=Homo sapiens (Human) OX=9606 GN=PPIA PE=1 SV=2	PPIA	4.15788	8.04167e-05	Yes	0.00139822	Yes	3.99773
Q9UDY2;Q9UDY2-2;Q9UDY2-3;Q9UDY2-4;Q9UDY2-5;Q9UDY2-	NA	TJP2	2.48041	8.125e-05	Yes	0.00139822	Yes	3.98476
P26599;P26599-2;P26599-3	>sp|P26599|PTBP1_HUMAN Polypyrimidine tract-binding protein 1 OS=Homo sapiens (Human) OX=9606 GN=PTBP1 PE=1 SV=1;>sp|P26599-2|PTBP1-2_HUMAN Isoform of P26599, Isoform 2 of Polypyrimidine tract-binding protein 1 OS=Homo sapiens (Human) OX=9606 GN=PTBP1 PE=1 SV=1;>sp|P26599-3|PTBP1-3_HUMAN Isoform of P26599, Isoform 3 of Polypyrimidine tract-binding protein 1 OS=Homo sapiens (Human) OX=9606 GN=PTBP…	PTBP1	1.93081	8.33333e-05	Yes	0.00141358	Yes	3.97578
P42765	>sp|P42765|THIM_HUMAN 3-ketoacyl-CoA thiolase, mitochondrial OS=Homo sapiens (Human) OX=9606 GN=ACAA2 PE=1 SV=2	ACAA2	1.64672	8.79167e-05	Yes	0.00142409	Yes	3.95673
K7EKU3;K7ENE8;P58549	>tr|K7EKU3|K7EKU3_HUMAN Isoform of P58549, FXYD domain-containing ion transport regulator OS=Homo sapiens (Human) OX=9606 GN=FXYD7 PE=1 SV=1;>tr|K7ENE8|K7ENE8_HUMAN Isoform of P58549, FXYD domain-containing ion transport regulator OS=Homo sapiens (Human) OX=9606 GN=FXYD7 PE=1 SV=1;>sp|P58549|FXYD7_HUMAN FXYD domain-containing ion transport regulator 7 OS=Homo sapiens (Human) OX=9606 GN=FXYD7 PE=1…	FXYD7	0.545714	8.79167e-05	Yes	0.00142409	Yes	-3.95862
Q15334	>sp|Q15334|L2GL1_HUMAN Lethal(2) giant larvae protein homolog 1 OS=Homo sapiens (Human) OX=9606 GN=LLGL1 PE=1 SV=3	LLGL1	1.90842	8.75e-05	Yes	0.00142409	Yes	3.96073
Q15149;Q15149-2;Q15149-4;Q15149-5;Q15149-6;Q15149-	NA	PLEC	2.42164	8.875e-05	Yes	0.00142409	Yes	3.94989
P26038	>sp|P26038|MOES_HUMAN Moesin OS=Homo sapiens (Human) OX=9606 GN=MSN PE=1 SV=3	MSN	2.13833	9.375e-05	Yes	0.00146473	Yes	3.93336
E9PF17;P13611;P13611-3	>tr|E9PF17|E9PF17_HUMAN Isoform of P13611, Versican core protein OS=Homo sapiens (Human) OX=9606 GN=VCAN PE=1 SV=2;>sp|P13611|CSPG2_HUMAN Versican core protein OS=Homo sapiens (Human) OX=9606 GN=VCAN PE=1 SV=3;>sp|P13611-3|CSPG2-3_HUMAN Isoform of P13611, Isoform V2 of Versican core protein OS=Homo sapiens (Human) OX=9606 GN=VCAN PE=1 SV=3	VCAN	2.17552	9.33333e-05	Yes	0.00146473	Yes	3.93469
Q96ME1-4	>sp|Q96ME1-4|FXL18-4_HUMAN Isoform of Q96ME1, Isoform 4 of F-box/LRR-repeat protein 18 OS=Homo sapiens (Human) OX=9606 GN=FBXL18 PE=1 SV=2	FBXL18	0.257074	9.5e-05	Yes	0.00146498	Yes	-3.92953
P05091	>sp|P05091|ALDH2_HUMAN Aldehyde dehydrogenase, mitochondrial OS=Homo sapiens (Human) OX=9606 GN=ALDH2 PE=1 SV=2	ALDH2	1.58193	0.000107083	Yes	0.00163015	Yes	3.8904
Q13153	>sp|Q13153|PAK1_HUMAN Serine/threonine-protein kinase PAK 1 OS=Homo sapiens (Human) OX=9606 GN=PAK1 PE=1 SV=2	PAK1	0.617744	0.000109583	Yes	0.00164709	Yes	-3.88651
O75936	>sp|O75936|BODG_HUMAN Gamma-butyrobetaine dioxygenase OS=Homo sapiens (Human) OX=9606 GN=BBOX1 PE=1 SV=1	BBOX1	2.12032	0.000114583	Yes	0.00167972	Yes	3.87077
B1APY8;B1APY9;P26378;P26378-2;P26378-3;P26378-4;P2	NA	ELAVL4	0.596801	0.000113333	Yes	0.00167972	Yes	-3.87715
Q8IV01	>sp|Q8IV01|SYT12_HUMAN Synaptotagmin-12 OS=Homo sapiens (Human) OX=9606 GN=SYT12 PE=1 SV=1	SYT12	0.587077	0.000120833	Yes	0.00174974	Yes	-3.85251
A0A087WX08;Q9UEY8-2	>tr|A0A087WX08|A0A087WX08_HUMAN Gamma-adducin OS=Homo sapiens GN=ADD3 PE=1 SV=1;>sp|Q9UEY8-2|ADDG-2_HUMAN Isoform of Q9UEY8, Isoform 1 of Gamma-adducin OS=Homo sapiens (Human) OX=9606 GN=ADD3 PE=1 SV=1	ADD3	1.84997	0.00012625	Yes	0.0017604	Yes	3.84058
Q53HC0;Q53HC0-2	>sp|Q53HC0|CCD92_HUMAN Coiled-coil domain-containing protein 92 OS=Homo sapiens (Human) OX=9606 GN=CCDC92 PE=1 SV=2;>sp|Q53HC0-2|CCD92-2_HUMAN Isoform of Q53HC0, Isoform 2 of Coiled-coil domain-containing protein 92 OS=Homo sapiens (Human) OX=9606 GN=CCDC92 PE=1 SV=2	CCDC92	0.477727	0.0001275	Yes	0.0017604	Yes	-3.83472
Q643R3	>sp|Q643R3|LPCT4_HUMAN Lysophospholipid acyltransferase LPCAT4 OS=Homo sapiens (Human) OX=9606 GN=LPCAT4 PE=1 SV=1	LPCAT4	0.194437	0.0001275	Yes	0.0017604	Yes	-3.83546
P23284	>sp|P23284|PPIB_HUMAN Peptidyl-prolyl cis-trans isomerase B OS=Homo sapiens (Human) OX=9606 GN=PPIB PE=1 SV=2	PPIB	2.6083	0.000127083	Yes	0.0017604	Yes	3.83783
Q96FE5;Q96FE5-2	>sp|Q96FE5|LIGO1_HUMAN Leucine-rich repeat and immunoglobulin-like domain-containing nogo receptor-interacting protein 1 OS=Homo sapiens (Human) OX=9606 GN=LINGO1 PE=1 SV=2;>sp|Q96FE5-2|LIGO1-2_HUMAN Isoform of Q96FE5, Isoform 2 of Leucine-rich repeat and immunoglobulin-like domain-containing nogo receptor-interacting protein 1 OS=Homo sapiens (Human) OX=9606 GN=LINGO1 PE=1 SV=2	LINGO1	0.611331	0.000130833	Yes	0.00178566	Yes	-3.82938
Q9UM22	>sp|Q9UM22|EPDR1_HUMAN Mammalian ependymin-related protein 1 OS=Homo sapiens (Human) OX=9606 GN=EPDR1 PE=1 SV=2	EPDR1	0.502817	0.000139583	Yes	0.00188006	Yes	-3.80986
C9JME2;Q9Y4F1;Q9Y4F1-2	>tr|C9JME2|C9JME2_HUMAN Isoform of Q9Y4F1, FERM, ARHGEF and pleckstrin domain-containing protein 1 OS=Homo sapiens (Human) OX=9606 GN=FARP1 PE=1 SV=2;>sp|Q9Y4F1|FARP1_HUMAN FERM, ARHGEF and pleckstrin domain-containing protein 1 OS=Homo sapiens (Human) OX=9606 GN=FARP1 PE=1 SV=1;>sp|Q9Y4F1-2|FARP1-2_HUMAN Isoform of Q9Y4F1, Isoform 2 of FERM, ARHGEF and pleckstrin domain-containing protein 1 OS=H…	FARP1	1.82169	0.0001425	Yes	0.00188006	Yes	3.79694
O14974;O14974-4;O14974-5	>sp|O14974|MYPT1_HUMAN Protein phosphatase 1 regulatory subunit 12A OS=Homo sapiens (Human) OX=9606 GN=PPP1R12A PE=1 SV=1;>sp|O14974-4|MYPT1-4_HUMAN Isoform of O14974, Isoform 4 of Protein phosphatase 1 regulatory subunit 12A OS=Homo sapiens (Human) OX=9606 GN=PPP1R12A PE=1 SV=1;>sp|O14974-5|MYPT1-5_HUMAN Isoform of O14974, Isoform 5 of Protein phosphatase 1 regulatory subunit 12A OS=Homo sapiens…	PPP1R12A	0.503198	0.000142083	Yes	0.00188006	Yes	-3.79874
Q13424	>sp|Q13424|SNTA1_HUMAN Alpha-1-syntrophin OS=Homo sapiens (Human) OX=9606 GN=SNTA1 PE=1 SV=1	SNTA1	1.53636	0.000146667	Yes	0.00191377	Yes	3.78808
Q01469	>sp|Q01469|FABP5_HUMAN Fatty acid-binding protein 5 OS=Homo sapiens (Human) OX=9606 GN=FABP5 PE=1 SV=3	FABP5	2.3355	0.000154167	Yes	0.00196837	Yes	3.77102
P05230	>sp|P05230|FGF1_HUMAN Fibroblast growth factor 1 OS=Homo sapiens (Human) OX=9606 GN=FGF1 PE=1 SV=1	FGF1	2.49103	0.00015375	Yes	0.00196837	Yes	3.77135
F5H810;Q99784;Q99784-3;Q99784-5	>tr|F5H810|F5H810_HUMAN Isoform of Q99784, Olfactomedin-like domain-containing protein (Fragment) OS=Homo sapiens (Human) OX=9606 GN=OLFM1 PE=1 SV=1;>sp|Q99784|NOE1_HUMAN Noelin OS=Homo sapiens (Human) OX=9606 GN=OLFM1 PE=1 SV=4;>sp|Q99784-3|NOE1-3_HUMAN Isoform of Q99784, Isoform 3 of Noelin OS=Homo sapiens (Human) OX=9606 GN=OLFM1 PE=1 SV=4;>sp|Q99784-5|NOE1-5_HUMAN Isoform of Q99784, Isoform 5…	OLFM1	0.538748	0.000158333	Yes	0.00200007	Yes	-3.76016
Q8N145	>sp|Q8N145|LGI3_HUMAN Leucine-rich repeat LGI family member 3 OS=Homo sapiens (Human) OX=9606 GN=LGI3 PE=2 SV=1	LGI3	0.42755	0.00016125	Yes	0.00200478	Yes	-3.75306
P27105	>sp|P27105|STOM_HUMAN Erythrocyte band 7 integral membrane protein OS=Homo sapiens (Human) OX=9606 GN=STOM PE=1 SV=3	STOM	1.87622	0.000162083	Yes	0.00200478	Yes	3.75134
Q9NR46-2	>sp|Q9NR46-2|SHLB2-2_HUMAN Isoform of Q9NR46, Isoform 2 of Endophilin-B2 OS=Homo sapiens (Human) OX=9606 GN=SH3GLB2 PE=1 SV=1	SH3GLB2	0.68075	0.000177917	Yes	0.00215571	Yes	-3.71835
O43399-2;O43399-3;O43399-4	>sp|O43399-2|TPD54-2_HUMAN Isoform of O43399, Isoform 2 of Tumor protein D54 OS=Homo sapiens (Human) OX=9606 GN=TPD52L2 PE=1 SV=2;>sp|O43399-3|TPD54-3_HUMAN Isoform of O43399, Isoform 3 of Tumor protein D54 OS=Homo sapiens (Human) OX=9606 GN=TPD52L2 PE=1 SV=2;>sp|O43399-4|TPD54-4_HUMAN Isoform of O43399, Isoform 4 of Tumor protein D54 OS=Homo sapiens (Human) OX=9606 GN=TPD52L2 PE=1 SV=2	TPD52L2	0.664707	0.0001775	Yes	0.00215571	Yes	-3.71856
Q86WV7;Q96MW1	>tr|Q86WV7|Q86WV7_HUMAN Isoform of Q96MW1, CCDC43 protein OS=Homo sapiens (Human) OX=9606 GN=CCDC43 PE=1 SV=1;>sp|Q96MW1|CCD43_HUMAN Coiled-coil domain-containing protein 43 OS=Homo sapiens (Human) OX=9606 GN=CCDC43 PE=1 SV=2	CCDC43	0.622334	0.000183333	Yes	0.00219891	Yes	-3.71016
P07305;P07305-2	>sp|P07305|H10_HUMAN Histone H1.0 OS=Homo sapiens (Human) OX=9606 GN=H1-0 PE=1 SV=3;>sp|P07305-2|H10-2_HUMAN Isoform of P07305, Isoform 2 of Histone H1.0 OS=Homo sapiens (Human) OX=9606 GN=H1-0 PE=1 SV=3	H1-0	2.50385	0.000199167	Yes	0.00236492	Yes	3.68739
Q13885	>sp|Q13885|TBB2A_HUMAN Tubulin beta-2A chain OS=Homo sapiens (Human) OX=9606 GN=TUBB2A PE=1 SV=1	TUBB2A	0.73319	0.00020625	Yes	0.00242478	Yes	-3.67449
Q9UQB8;Q9UQB8-2;Q9UQB8-3;Q9UQB8-4;Q9UQB8-5;Q9UQB8-	NA	BAIAP2	0.743837	0.000209583	Yes	0.00243981	Yes	-3.67109
H7C4U4;H7C5D3;Q0P5T2;Q5SQH8;Q5SQH8-2;Q5SQH8-3;Q5SQ	NA	C6orf136	0.60804	0.000213333	Yes	0.00245936	Yes	-3.66539
A0A0A0MRX1;B1AM49;Q12926	>tr|A0A0A0MRX1|A0A0A0MRX1_HUMAN Isoform of Q12926, ELAV-like protein OS=Homo sapiens (Human) OX=9606 GN=ELAVL2 PE=1 SV=1;>tr|B1AM49|B1AM49_HUMAN ELAV-like protein OS=Homo sapiens GN=ELAVL2 PE=1 SV=1;>sp|Q12926|ELAV2_HUMAN ELAV-like protein 2 OS=Homo sapiens (Human) OX=9606 GN=ELAVL2 PE=1 SV=2	ELAVL2	0.524976	0.000225833	Yes	0.00257743	Yes	-3.64556
P24821	>sp|P24821|TENA_HUMAN Tenascin OS=Homo sapiens (Human) OX=9606 GN=TNC PE=1 SV=3	TNC	4.84288	0.000227917	Yes	0.00257743	Yes	3.64304
O94925	>sp|O94925|GLSK_HUMAN Glutaminase kidney isoform, mitochondrial OS=Homo sapiens (Human) OX=9606 GN=GLS PE=1 SV=1	GLS	0.614318	0.00024375	Yes	0.00273048	Yes	-3.62075
F5H039;Q9NQX3;Q9NQX3-2	>tr|F5H039|F5H039_HUMAN Isoform of Q9NQX3, Molybdopterin molybdenumtransferase OS=Homo sapiens (Human) OX=9606 GN=GPHN PE=1 SV=1;>sp|Q9NQX3|GEPH_HUMAN Gephyrin OS=Homo sapiens (Human) OX=9606 GN=GPHN PE=1 SV=1;>sp|Q9NQX3-2|GEPH-2_HUMAN Isoform of Q9NQX3, Isoform 2 of Gephyrin OS=Homo sapiens (Human) OX=9606 GN=GPHN PE=1 SV=1	GPHN	0.609261	0.000251667	Yes	0.00274157	Yes	-3.60721
Q86YM7	>sp|Q86YM7|HOME1_HUMAN Homer protein homolog 1 OS=Homo sapiens (Human) OX=9606 GN=HOMER1 PE=1 SV=2	HOMER1	0.576125	0.000251667	Yes	0.00274157	Yes	-3.60784
Q9NQ66	>sp|Q9NQ66|PLCB1_HUMAN 1-phosphatidylinositol 4,5-bisphosphate phosphodiesterase beta-1 OS=Homo sapiens (Human) OX=9606 GN=PLCB1 PE=1 SV=1	PLCB1	0.646861	0.000248333	Yes	0.00274157	Yes	-3.61499
P26885	>sp|P26885|FKBP2_HUMAN Peptidyl-prolyl cis-trans isomerase FKBP2 OS=Homo sapiens (Human) OX=9606 GN=FKBP2 PE=1 SV=2	FKBP2	2.04725	0.000267083	Yes	0.00288306	Yes	3.58431
P04083	>sp|P04083|ANXA1_HUMAN Annexin A1 OS=Homo sapiens (Human) OX=9606 GN=ANXA1 PE=1 SV=2	ANXA1	2.63642	0.000282083	Yes	0.00298604	Yes	3.56382
P55060;P55060-3	>sp|P55060|XPO2_HUMAN Exportin-2 OS=Homo sapiens (Human) OX=9606 GN=CSE1L PE=1 SV=3;>sp|P55060-3|XPO2-3_HUMAN Isoform of P55060, Isoform 3 of Exportin-2 OS=Homo sapiens (Human) OX=9606 GN=CSE1L PE=1 SV=3	CSE1L	1.48529	0.000284167	Yes	0.00298604	Yes	3.56053
Q99714	>sp|Q99714|HCD2_HUMAN 3-hydroxyacyl-CoA dehydrogenase type-2 OS=Homo sapiens (Human) OX=9606 GN=HSD17B10 PE=1 SV=3	HSD17B10	2.04975	0.000283333	Yes	0.00298604	Yes	3.56205
Q92558	>sp|Q92558|WASF1_HUMAN Wiskott-Aldrich syndrome protein family member 1 OS=Homo sapiens (Human) OX=9606 GN=WASF1 PE=1 SV=1	WASF1	0.589896	0.00029	Yes	0.0030206	Yes	-3.55436
Q9UL15;Q9UL15-2	>sp|Q9UL15|BAG5_HUMAN BAG family molecular chaperone regulator 5 OS=Homo sapiens (Human) OX=9606 GN=BAG5 PE=1 SV=1;>sp|Q9UL15-2|BAG5-2_HUMAN Isoform of Q9UL15, Isoform 2 of BAG family molecular chaperone regulator 5 OS=Homo sapiens (Human) OX=9606 GN=BAG5 PE=1 SV=1	BAG5	0.460314	0.000294583	Yes	0.00304166	Yes	-3.54753
O15540	>sp|O15540|FABP7_HUMAN Fatty acid-binding protein, brain OS=Homo sapiens (Human) OX=9606 GN=FABP7 PE=1 SV=3	FABP7	2.46528	0.000302917	Yes	0.00310074	Yes	3.53782
Q6NV74	>sp|Q6NV74|K121L_HUMAN Uncharacterized protein KIAA1211-like OS=Homo sapiens (Human) OX=9606 GN=KIAA1211L PE=1 SV=3	KIAA1211L	0.377826	0.000307083	Yes	0.00311653	Yes	-3.53174
P00568;Q5T9B7	>sp|P00568|KAD1_HUMAN Adenylate kinase isoenzyme 1 OS=Homo sapiens (Human) OX=9606 GN=AK1 PE=1 SV=3;>tr|Q5T9B7|Q5T9B7_HUMAN Isoform of P00568, Adenylate kinase isoenzyme 1 OS=Homo sapiens (Human) OX=9606 GN=AK1 PE=1 SV=1	AK1	1.9309	0.00031875	Yes	0.00313208	Yes	3.51746
Q8TF61	>sp|Q8TF61|FBX41_HUMAN F-box only protein 41 OS=Homo sapiens (Human) OX=9606 GN=FBXO41 PE=2 SV=5	FBXO41	0.680824	0.00031875	Yes	0.00313208	Yes	-3.51789
G3V0E5;P02786	>tr|G3V0E5|G3V0E5_HUMAN Isoform of P02786, Transferrin receptor (P90, CD71), isoform CRA_c OS=Homo sapiens (Human) OX=9606 GN=TFRC PE=1 SV=1;>sp|P02786|TFR1_HUMAN Transferrin receptor protein 1 OS=Homo sapiens (Human) OX=9606 GN=TFRC PE=1 SV=2	TFRC	0.390189	0.000315417	Yes	0.00313208	Yes	-3.52349
P12270	>sp|P12270|TPR_HUMAN Nucleoprotein TPR OS=Homo sapiens (Human) OX=9606 GN=TPR PE=1 SV=3	TPR	2.82093	0.000319167	Yes	0.00313208	Yes	3.51692
P04792	>sp|P04792|HSPB1_HUMAN Heat shock protein beta-1 OS=Homo sapiens (Human) OX=9606 GN=HSPB1 PE=1 SV=2	HSPB1	2.44201	0.000327917	Yes	0.00316562	Yes	3.51095
Q5VWJ9	>sp|Q5VWJ9|SNX30_HUMAN Sorting nexin-30 OS=Homo sapiens (Human) OX=9606 GN=SNX30 PE=1 SV=1	SNX30	0.660083	0.000327083	Yes	0.00316562	Yes	-3.51138
P30419;P30419-2	>sp|P30419|NMT1_HUMAN Glycylpeptide N-tetradecanoyltransferase 1 OS=Homo sapiens (Human) OX=9606 GN=NMT1 PE=1 SV=2;>sp|P30419-2|NMT1-2_HUMAN Isoform of P30419, Isoform Short of Glycylpeptide N-tetradecanoyltransferase 1 OS=Homo sapiens (Human) OX=9606 GN=NMT1 PE=1 SV=2	NMT1	0.467616	0.000335833	Yes	0.0032159	Yes	-3.50068
Q99447;Q99447-3;Q99447-4	>sp|Q99447|PCY2_HUMAN Ethanolamine-phosphate cytidylyltransferase OS=Homo sapiens (Human) OX=9606 GN=PCYT2 PE=1 SV=1;>sp|Q99447-3|PCY2-3_HUMAN Isoform of Q99447, Isoform 3 of Ethanolamine-phosphate cytidylyltransferase OS=Homo sapiens (Human) OX=9606 GN=PCYT2 PE=1 SV=1;>sp|Q99447-4|PCY2-4_HUMAN Isoform of Q99447, Isoform 4 of Ethanolamine-phosphate cytidylyltransferase OS=Homo sapiens (Human) OX=…	PCYT2	1.78903	0.000345	Yes	0.00327725	Yes	3.49179
O75489	>sp|O75489|NDUS3_HUMAN NADH dehydrogenase [ubiquinone] iron-sulfur protein 3, mitochondrial OS=Homo sapiens (Human) OX=9606 GN=NDUFS3 PE=1 SV=1	NDUFS3	0.71822	0.000350417	Yes	0.00330228	Yes	-3.48473
P27338	>sp|P27338|AOFB_HUMAN Amine oxidase [flavin-containing] B OS=Homo sapiens (Human) OX=9606 GN=MAOB PE=1 SV=3	MAOB	2.39069	0.000365	Yes	0.00341263	Yes	3.46696
P05026;P05026-2	>sp|P05026|AT1B1_HUMAN Sodium/potassium-transporting ATPase subunit beta-1 OS=Homo sapiens (Human) OX=9606 GN=ATP1B1 PE=1 SV=1;>sp|P05026-2|AT1B1-2_HUMAN Isoform of P05026, Isoform 2 of Sodium/potassium-transporting ATPase subunit beta-1 OS=Homo sapiens (Human) OX=9606 GN=ATP1B1 PE=1 SV=1	ATP1B1	0.734841	0.000375	Yes	0.00347874	Yes	-3.45643
F8WAD8;Q9P0K1;Q9P0K1-2;Q9P0K1-3;Q9P0K1-4;Q9P0K1-5	>tr|F8WAD8|F8WAD8_HUMAN Isoform of Q9P0K1, Disintegrin and metalloproteinase domain-containing protein 22 (Fragment) OS=Homo sapiens (Human) OX=9606 GN=ADAM22 PE=1 SV=1;>sp|Q9P0K1|ADA22_HUMAN Disintegrin and metalloproteinase domain-containing protein 22 OS=Homo sapiens (Human) OX=9606 GN=ADAM22 PE=1 SV=1;>sp|Q9P0K1-2|ADA22-2_HUMAN Isoform of Q9P0K1, Isoform 2 of Disintegrin and metalloproteinase…	ADAM22	0.607524	0.000385833	Yes	0.00353939	Yes	-3.44378
F5H2R5;F5H3P3;F5H6Q0;P52566	>tr|F5H2R5|F5H2R5_HUMAN Isoform of P52566, Rho GDP-dissociation inhibitor 2 (Fragment) OS=Homo sapiens (Human) OX=9606 GN=ARHGDIB PE=1 SV=1;>tr|F5H3P3|F5H3P3_HUMAN Isoform of P52566, Rho GDP-dissociation inhibitor 2 (Fragment) OS=Homo sapiens (Human) OX=9606 GN=ARHGDIB PE=1 SV=8;>tr|F5H6Q0|F5H6Q0_HUMAN Isoform of P52566, Rho GDP-dissociation inhibitor 2 (Fragment) OS=Homo sapiens (Human) OX=9606 …	ARHGDIB	3.47339	0.0003875	Yes	0.00353939	Yes	3.44264
Q9UIJ7	>sp|Q9UIJ7|KAD3_HUMAN GTP:AMP phosphotransferase AK3, mitochondrial OS=Homo sapiens (Human) OX=9606 GN=AK3 PE=1 SV=4	AK3	1.55556	0.000415833	Yes	0.00374388	Yes	3.42001
F8WA11;Q7Z460;Q7Z460-2;Q7Z460-3;Q7Z460-4;Q7Z460-5	>tr|F8WA11|F8WA11_HUMAN Isoform of Q7Z460, CLIP-associating protein 1 OS=Homo sapiens (Human) OX=9606 GN=CLASP1 PE=1 SV=2;>sp|Q7Z460|CLAP1_HUMAN CLIP-associating protein 1 OS=Homo sapiens (Human) OX=9606 GN=CLASP1 PE=1 SV=1;>sp|Q7Z460-2|CLAP1-2_HUMAN Isoform of Q7Z460, Isoform 2 of CLIP-associating protein 1 OS=Homo sapiens (Human) OX=9606 GN=CLASP1 PE=1 SV=1;>sp|Q7Z460-3|CLAP1-3_HUMAN Isoform of…	CLASP1	0.558304	0.000420833	Yes	0.00374388	Yes	-3.4168
P17302	>sp|P17302|CXA1_HUMAN Gap junction alpha-1 protein OS=Homo sapiens (Human) OX=9606 GN=GJA1 PE=1 SV=2	GJA1	3.57948	0.0004225	Yes	0.00374388	Yes	3.41517
E7ESP9;P07197	>tr|E7ESP9|E7ESP9_HUMAN Isoform of P07197, IF rod domain-containing protein OS=Homo sapiens (Human) OX=9606 GN=NEFM PE=1 SV=1;>sp|P07197|NFM_HUMAN Neurofilament medium polypeptide OS=Homo sapiens (Human) OX=9606 GN=NEFM PE=1 SV=3	NEFM	0.512915	0.000418333	Yes	0.00374388	Yes	-3.41852
P46940	>sp|P46940|IQGA1_HUMAN Ras GTPase-activating-like protein IQGAP1 OS=Homo sapiens (Human) OX=9606 GN=IQGAP1 PE=1 SV=1	IQGAP1	1.93892	0.0004375	Yes	0.00384808	Yes	3.40467
E9PRP3;H0YDP1;Q9UPX0;Q9UPX0-2	>tr|E9PRP3|E9PRP3_HUMAN Isoform of Q9UPX0, Ig-like domain-containing protein (Fragment) OS=Homo sapiens (Human) OX=9606 GN=IGSF9B PE=1 SV=1;>tr|H0YDP1|H0YDP1_HUMAN Isoform of Q9UPX0, Protein turtle homolog B (Fragment) OS=Homo sapiens (Human) OX=9606 GN=IGSF9B PE=1 SV=1;>sp|Q9UPX0|TUTLB_HUMAN Protein turtle homolog B OS=Homo sapiens (Human) OX=9606 GN=IGSF9B PE=2 SV=2;>sp|Q9UPX0-2|TUTLB-2_HUMAN I…	IGSF9B	0.374829	0.000445	Yes	0.00388527	Yes	-3.39964
P55087;V9PBN7	>sp|P55087|AQP4_HUMAN Aquaporin-4 OS=Homo sapiens (Human) OX=9606 GN=AQP4 PE=1 SV=2;>tr|V9PBN7|V9PBN7_HUMAN Aquaporin 4 isoform delta4 OS=Homo sapiens GN=AQP4 PE=2 SV=1	AQP4	2.53399	0.00044875	Yes	0.00388941	Yes	3.39678
P30041	>sp|P30041|PRDX6_HUMAN Peroxiredoxin-6 OS=Homo sapiens (Human) OX=9606 GN=PRDX6 PE=1 SV=3	PRDX6	2.23551	0.000474167	Yes	0.00407993	Yes	3.3798
P02792	>sp|P02792|FRIL_HUMAN Ferritin light chain OS=Homo sapiens (Human) OX=9606 GN=FTL PE=1 SV=2	FTL	2.40202	0.000497083	Yes	0.00424634	Yes	3.36432
P51570;P51570-2	>sp|P51570|GALK1_HUMAN Galactokinase OS=Homo sapiens (Human) OX=9606 GN=GALK1 PE=1 SV=1;>sp|P51570-2|GALK1-2_HUMAN Isoform of P51570, Isoform 2 of Galactokinase OS=Homo sapiens (Human) OX=9606 GN=GALK1 PE=1 SV=1	GALK1	2.1961	0.000520833	Yes	0.00441744	Yes	3.35013
Q8NE62	>sp|Q8NE62|CHDH_HUMAN Choline dehydrogenase, mitochondrial OS=Homo sapiens (Human) OX=9606 GN=CHDH PE=1 SV=2	CHDH	2.31351	0.0005425	Yes	0.00456858	Yes	3.33479
Q5TEC6	>tr|Q5TEC6|Q5TEC6_HUMAN Histone H3 OS=Homo sapiens (Human) OX=9606 GN=HIST2H3PS2 PE=1 SV=1	HIST2H3PS2	1.72773	0.000552083	Yes	0.00461654	Yes	3.3266
H7C276;Q9UPR0;Q9UPR0-2;Q9UPR0-3	>tr|H7C276|H7C276_HUMAN Isoform of Q9UPR0, Phosphoinositide phospholipase C (Fragment) OS=Homo sapiens (Human) OX=9606 GN=PLCL2 PE=1 SV=1;>sp|Q9UPR0|PLCL2_HUMAN Inactive phospholipase C-like protein 2 OS=Homo sapiens (Human) OX=9606 GN=PLCL2 PE=1 SV=2;>sp|Q9UPR0-2|PLCL2-2_HUMAN Isoform of Q9UPR0, Isoform 2 of Inactive phospholipase C-like protein 2 OS=Homo sapiens (Human) OX=9606 GN=PLCL2 PE=1 SV…	PLCL2	0.669741	0.00056625	Yes	0.00470189	Yes	-3.31852
Q5VWZ2;Q5VWZ2-2	>sp|Q5VWZ2|LYPL1_HUMAN Lysophospholipase-like protein 1 OS=Homo sapiens (Human) OX=9606 GN=LYPLAL1 PE=1 SV=3;>sp|Q5VWZ2-2|LYPL1-2_HUMAN Isoform of Q5VWZ2, Isoform 2 of Lysophospholipase-like protein 1 OS=Homo sapiens (Human) OX=9606 GN=LYPLAL1 PE=1 SV=3	LYPLAL1	2.36627	0.000591667	Yes	0.00485541	Yes	3.29772
A0A087X1Z3;Q9UL46	>tr|A0A087X1Z3|A0A087X1Z3_HUMAN Isoform of Q9UL46, Proteasome activator complex subunit 2 OS=Homo sapiens (Human) OX=9606 GN=PSME2 PE=1 SV=1;>sp|Q9UL46|PSME2_HUMAN Proteasome activator complex subunit 2 OS=Homo sapiens (Human) OX=9606 GN=PSME2 PE=1 SV=4	PSME2	1.96108	0.000592917	Yes	0.00485541	Yes	3.29575
E9PPG8	>tr|E9PPG8|E9PPG8_HUMAN Isoform of Q53FT3, DUF775 domain-containing protein OS=Homo sapiens (Human) OX=9606 GN=HIKESHI PE=1 SV=1	HIKESHI	3.39942	0.00059875	Yes	0.0048696	Yes	3.29254
Q14344	>sp|Q14344|GNA13_HUMAN Guanine nucleotide-binding protein subunit alpha-13 OS=Homo sapiens (Human) OX=9606 GN=GNA13 PE=1 SV=2	GNA13	2.0199	0.000605417	Yes	0.00489032	Yes	3.2876
E7EWD3;O75077;O75077-2	>tr|E7EWD3|E7EWD3_HUMAN Isoform of O75077, Disintegrin and metalloproteinase domain-containing protein 23 OS=Homo sapiens (Human) OX=9606 GN=ADAM23 PE=1 SV=2;>sp|O75077|ADA23_HUMAN Disintegrin and metalloproteinase domain-containing protein 23 OS=Homo sapiens (Human) OX=9606 GN=ADAM23 PE=1 SV=1;>sp|O75077-2|ADA23-2_HUMAN Isoform of O75077, Isoform Beta of Disintegrin and metalloproteinase domain-…	ADAM23	0.518144	0.000617917	Yes	0.00495757	Yes	-3.28093
P21333;P21333-2;Q5HY54;Q60FE5	>sp|P21333|FLNA_HUMAN Filamin-A OS=Homo sapiens (Human) OX=9606 GN=FLNA PE=1 SV=4;>sp|P21333-2|FLNA-2_HUMAN Isoform of P21333, Isoform 2 of Filamin-A OS=Homo sapiens (Human) OX=9606 GN=FLNA PE=1 SV=4;>tr|Q5HY54|Q5HY54_HUMAN Filamin-A OS=Homo sapiens GN=FLNA PE=1 SV=1;>tr|Q60FE5|Q60FE5_HUMAN Isoform of P21333, Filamin-A OS=Homo sapiens (Human) OX=9606 GN=FLNA PE=1 SV=1	FLNA	2.44481	0.000628333	Yes	0.00500731	Yes	3.27624
Q96DG6	>sp|Q96DG6|CMBL_HUMAN Carboxymethylenebutenolidase homolog OS=Homo sapiens (Human) OX=9606 GN=CMBL PE=1 SV=1	CMBL	2.17412	0.000645833	Yes	0.00501221	Yes	3.26667
O60331;O60331-2;O60331-3;O60331-4	>sp|O60331|PI51C_HUMAN Phosphatidylinositol 4-phosphate 5-kinase type-1 gamma OS=Homo sapiens (Human) OX=9606 GN=PIP5K1C PE=1 SV=2;>sp|O60331-2|PI51C-2_HUMAN Isoform of O60331, Isoform 2 of Phosphatidylinositol 4-phosphate 5-kinase type-1 gamma OS=Homo sapiens (Human) OX=9606 GN=PIP5K1C PE=1 SV=2;>sp|O60331-3|PI51C-3_HUMAN Isoform of O60331, Isoform 3 of Phosphatidylinositol 4-phosphate 5-kinase …	PIP5K1C	0.725646	0.00064375	Yes	0.00501221	Yes	-3.26753
B5MCX3;Q15019;Q15019-2;Q15019-3	>tr|B5MCX3|B5MCX3_HUMAN Isoform of Q15019, Septin-type G domain-containing protein OS=Homo sapiens (Human) OX=9606 GN=SEPTIN2 PE=1 SV=1;>sp|Q15019|SEPT2_HUMAN Septin-2 OS=Homo sapiens (Human) OX=9606 GN=SEPTIN2 PE=1 SV=1;>sp|Q15019-2|SEPT2-2_HUMAN Isoform of Q15019, Isoform 2 of Septin-2 OS=Homo sapiens (Human) OX=9606 GN=SEPTIN2 PE=1 SV=1;>sp|Q15019-3|SEPT2-3_HUMAN Isoform of Q15019, Isoform 3 o…	SEPTIN2	1.61402	0.00064125	Yes	0.00501221	Yes	3.26941
H0YLR3;H0YMA0;P09661	>tr|H0YLR3|H0YLR3_HUMAN Isoform of P09661, U2 small nuclear ribonucleoprotein A' (Fragment) OS=Homo sapiens (Human) OX=9606 GN=SNRPA1 PE=1 SV=1;>tr|H0YMA0|H0YMA0_HUMAN Isoform of P09661, LRRcap domain-containing protein (Fragment) OS=Homo sapiens (Human) OX=9606 GN=SNRPA1 PE=1 SV=1;>sp|P09661|RU2A_HUMAN U2 small nuclear ribonucleoprotein A' OS=Homo sapiens (Human) OX=9606 GN=SNRPA1 PE=1 SV=2	SNRPA1	0.433141	0.000634167	Yes	0.00501221	Yes	-3.27475
D6W648;Q9P1Y5;Q9P1Y5-2	>tr|D6W648|D6W648_HUMAN Calmodulin-regulated spectrin-associated protein 3 OS=Homo sapiens GN=CAMSAP3 PE=4 SV=1;>sp|Q9P1Y5|CAMP3_HUMAN Calmodulin-regulated spectrin-associated protein 3 OS=Homo sapiens (Human) OX=9606 GN=CAMSAP3 PE=1 SV=2;>sp|Q9P1Y5-2|CAMP3-2_HUMAN Isoform of Q9P1Y5, Isoform 2 of Calmodulin-regulated spectrin-associated protein 3 OS=Homo sapiens (Human) OX=9606 GN=CAMSAP3 PE=1 SV…	CAMSAP3	0.685149	0.00065875	Yes	0.00507926	Yes	-3.25944
B3KRD8;O76054;O76054-5	>tr|B3KRD8|B3KRD8_HUMAN Isoform of O76054, SEC14-like 2 (S. cerevisiae), isoform CRA_c OS=Homo sapiens (Human) OX=9606 GN=SEC14L2 PE=1 SV=1;>sp|O76054|S14L2_HUMAN SEC14-like protein 2 OS=Homo sapiens (Human) OX=9606 GN=SEC14L2 PE=1 SV=1;>sp|O76054-5|S14L2-5_HUMAN Isoform of O76054, Isoform 3 of SEC14-like protein 2 OS=Homo sapiens (Human) OX=9606 GN=SEC14L2 PE=1 SV=1	SEC14L2	2.49014	0.000664583	Yes	0.00509117	Yes	3.2556
P62805	>sp|P62805|H4_HUMAN Histone H4 OS=Homo sapiens (Human) OX=9606 GN=H4C12 PE=1 SV=2	H4C12	1.73316	0.000669167	Yes	0.00509343	Yes	3.25033
P21399	>sp|P21399|ACOC_HUMAN Cytoplasmic aconitate hydratase OS=Homo sapiens (Human) OX=9606 GN=ACO1 PE=1 SV=3	ACO1	1.64351	0.000684583	Yes	0.00514481	Yes	3.24279
P13489	>sp|P13489|RINI_HUMAN Ribonuclease inhibitor OS=Homo sapiens (Human) OX=9606 GN=RNH1 PE=1 SV=2	RNH1	1.57787	0.000680417	Yes	0.00514481	Yes	3.24484
B8ZZB8;Q96F85;Q96F85-2	>tr|B8ZZB8|B8ZZB8_HUMAN Isoform of Q96F85, CB1 cannabinoid receptor-interacting protein 1 OS=Homo sapiens (Human) OX=9606 GN=CNRIP1 PE=1 SV=1;>sp|Q96F85|CNRP1_HUMAN CB1 cannabinoid receptor-interacting protein 1 OS=Homo sapiens (Human) OX=9606 GN=CNRIP1 PE=1 SV=1;>sp|Q96F85-2|CNRP1-2_HUMAN Isoform of Q96F85, Isoform 2 of CB1 cannabinoid receptor-interacting protein 1 OS=Homo sapiens (Human) OX=96…	CNRIP1	1.67217	0.000701667	Yes	0.00520728	Yes	3.23451
P78318	>sp|P78318|IGBP1_HUMAN Immunoglobulin-binding protein 1 OS=Homo sapiens (Human) OX=9606 GN=IGBP1 PE=1 SV=1	IGBP1	0.424189	0.000700417	Yes	0.00520728	Yes	-3.23566
E9PHY5;O43491-4	>tr|E9PHY5|E9PHY5_HUMAN Isoform of O43491, FERM domain-containing protein OS=Homo sapiens (Human) OX=9606 GN=EPB41L2 PE=1 SV=1;>sp|O43491-4|E41L2-4_HUMAN Isoform of O43491, Isoform 4 of Band 4.1-like protein 2 OS=Homo sapiens (Human) OX=9606 GN=EPB41L2 PE=1 SV=1	EPB41L2	1.5572	0.000715	Yes	0.00527327	Yes	3.22635
P07741	>sp|P07741|APT_HUMAN Adenine phosphoribosyltransferase OS=Homo sapiens (Human) OX=9606 GN=APRT PE=1 SV=2	APRT	1.96986	0.000735417	Yes	0.00539037	Yes	3.21866
Q15404;Q15404-2	>sp|Q15404|RSU1_HUMAN Ras suppressor protein 1 OS=Homo sapiens (Human) OX=9606 GN=RSU1 PE=1 SV=3;>sp|Q15404-2|RSU1-2_HUMAN Isoform of Q15404, Isoform 2 of Ras suppressor protein 1 OS=Homo sapiens (Human) OX=9606 GN=RSU1 PE=1 SV=3	RSU1	1.75981	0.000744167	Yes	0.00542104	Yes	3.21503
Q6PKG0;Q6PKG0-3	>sp|Q6PKG0|LARP1_HUMAN La-related protein 1 OS=Homo sapiens (Human) OX=9606 GN=LARP1 PE=1 SV=2;>sp|Q6PKG0-3|LARP1-3_HUMAN Isoform of Q6PKG0, Isoform 2 of La-related protein 1 OS=Homo sapiens (Human) OX=9606 GN=LARP1 PE=1 SV=2	LARP1	0.671802	0.000752083	Yes	0.00544531	Yes	-3.20969
Q13303	>sp|Q13303|KCAB2_HUMAN Voltage-gated potassium channel subunit beta-2 OS=Homo sapiens (Human) OX=9606 GN=KCNAB2 PE=1 SV=2	KCNAB2	0.535641	0.000764167	Yes	0.00549926	Yes	-3.20282
Q96HC4	>sp|Q96HC4|PDLI5_HUMAN PDZ and LIM domain protein 5 OS=Homo sapiens (Human) OX=9606 GN=PDLIM5 PE=1 SV=5	PDLIM5	2.7579	0.00077375	Yes	0.00553468	Yes	3.19834
Q8WXF7-2	>sp|Q8WXF7-2|ATLA1-2_HUMAN Isoform of Q8WXF7, Isoform 2 of Atlastin-1 OS=Homo sapiens (Human) OX=9606 GN=ATL1 PE=1 SV=1	ATL1	0.717326	0.000779167	Yes	0.00554006	Yes	-3.1961
O95865	>sp|O95865|DDAH2_HUMAN N(G),N(G)-dimethylarginine dimethylaminohydrolase 2 OS=Homo sapiens (Human) OX=9606 GN=DDAH2 PE=1 SV=1	DDAH2	2.06981	0.00079	Yes	0.00558365	Yes	3.19225
P30043	>sp|P30043|BLVRB_HUMAN Flavin reductase (NADPH) OS=Homo sapiens (Human) OX=9606 GN=BLVRB PE=1 SV=3	BLVRB	3.74807	0.000800833	Yes	0.00559363	Yes	3.18894
D6RDN9;Q15119;Q15119-2	>tr|D6RDN9|D6RDN9_HUMAN Isoform of Q15119, Protein-serine/threonine kinase (Fragment) OS=Homo sapiens (Human) OX=9606 GN=PDK2 PE=1 SV=1;>sp|Q15119|PDK2_HUMAN [Pyruvate dehydrogenase (acetyl-transferring)] kinase isozyme 2, mitochondrial OS=Homo sapiens (Human) OX=9606 GN=PDK2 PE=1 SV=2;>sp|Q15119-2|PDK2-2_HUMAN Isoform of Q15119, Isoform 2 of [Pyruvate dehydrogenase (acetyl-transferring)] kinase …	PDK2	0.680353	0.000799167	Yes	0.00559363	Yes	-3.1897
F5GX29;H0YKE7;H0YLY7;H0YNG9;Q99653	>tr|F5GX29|F5GX29_HUMAN Isoform of Q99653, EF-hand domain-containing protein OS=Homo sapiens (Human) OX=9606 GN=CHP1 PE=1 SV=1;>tr|H0YKE7|H0YKE7_HUMAN Isoform of Q99653, EF-hand domain-containing protein OS=Homo sapiens (Human) OX=9606 GN=CHP1 PE=1 SV=1;>tr|H0YLY7|H0YLY7_HUMAN Isoform of Q99653, EF-hand domain-containing protein (Fragment) OS=Homo sapiens (Human) OX=9606 GN=CHP1 PE=1 SV=1;>tr|H0Y…	CHP1	0.63203	0.00081	Yes	0.00562457	Yes	-3.18513
Q8N5S9	>sp|Q8N5S9|KKCC1_HUMAN Calcium/calmodulin-dependent protein kinase kinase 1 OS=Homo sapiens (Human) OX=9606 GN=CAMKK1 PE=1 SV=2	CAMKK1	0.567026	0.000840833	Yes	0.00580473	Yes	-3.17118
Q15223	>sp|Q15223|NECT1_HUMAN Nectin-1 OS=Homo sapiens (Human) OX=9606 GN=NECTIN1 PE=1 SV=3	NECTIN1	0.697389	0.000853333	Yes	0.00585697	Yes	-3.16627
Q27J81;Q27J81-2	>sp|Q27J81|INF2_HUMAN Inverted formin-2 OS=Homo sapiens (Human) OX=9606 GN=INF2 PE=1 SV=2;>sp|Q27J81-2|INF2-2_HUMAN Isoform of Q27J81, Isoform 2 of Inverted formin-2 OS=Homo sapiens (Human) OX=9606 GN=INF2 PE=1 SV=2	INF2	0.576248	0.000878333	Yes	0.00595966	Yes	-3.15526
M0QWZ7;Q9NP81	>tr|M0QWZ7|M0QWZ7_HUMAN Isoform of Q9NP81, AA_TRNA_LIGASE_II domain-containing protein OS=Homo sapiens (Human) OX=9606 GN=SARS2 PE=1 SV=1;>sp|Q9NP81|SYSM_HUMAN Serine--tRNA ligase, mitochondrial OS=Homo sapiens (Human) OX=9606 GN=SARS2 PE=1 SV=1	SARS2	0.495616	0.000874583	Yes	0.00595966	Yes	-3.15723
P08758	>sp|P08758|ANXA5_HUMAN Annexin A5 OS=Homo sapiens (Human) OX=9606 GN=ANXA5 PE=1 SV=2	ANXA5	1.81318	0.000884167	Yes	0.00596515	Yes	3.15271
M0QZ28;M0R021;Q9Y4J8;Q9Y4J8-10;Q9Y4J8-11;Q9Y4J8-12	NA	DTNA	1.56096	0.0009025	Yes	0.00602043	Yes	3.14535
Q15773	>sp|Q15773|MLF2_HUMAN Myeloid leukemia factor 2 OS=Homo sapiens (Human) OX=9606 GN=MLF2 PE=1 SV=1	MLF2	0.536518	0.0009025	Yes	0.00602043	Yes	-3.14521
P11182	>sp|P11182|ODB2_HUMAN Lipoamide acyltransferase component of branched-chain alpha-keto acid dehydrogenase complex, mitochondrial OS=Homo sapiens (Human) OX=9606 GN=DBT PE=1 SV=3	DBT	0.651312	0.00093	Yes	0.00616922	Yes	-3.13495
Q9NUB1;Q9NUB1-2	>sp|Q9NUB1|ACS2L_HUMAN Acetyl-coenzyme A synthetase 2-like, mitochondrial OS=Homo sapiens (Human) OX=9606 GN=ACSS1 PE=1 SV=2;>sp|Q9NUB1-2|ACS2L-2_HUMAN Isoform of Q9NUB1, Isoform 2 of Acetyl-coenzyme A synthetase 2-like, mitochondrial OS=Homo sapiens (Human) OX=9606 GN=ACSS1 PE=1 SV=2	ACSS1	1.64655	0.00097	Yes	0.00627401	Yes	3.12172
P61601	>sp|P61601|NCALD_HUMAN Neurocalcin-delta OS=Homo sapiens (Human) OX=9606 GN=NCALD PE=1 SV=2	NCALD	0.460397	0.00095125	Yes	0.00627401	Yes	-3.12882
Q9NRX4	>sp|Q9NRX4|PHP14_HUMAN 14 kDa phosphohistidine phosphatase OS=Homo sapiens (Human) OX=9606 GN=PHPT1 PE=1 SV=1	PHPT1	2.05449	0.0009775	Yes	0.00627401	Yes	3.11903
P27986;P27986-4	>sp|P27986|P85A_HUMAN Phosphatidylinositol 3-kinase regulatory subunit alpha OS=Homo sapiens (Human) OX=9606 GN=PIK3R1 PE=1 SV=2;>sp|P27986-4|P85A-4_HUMAN Isoform of P27986, Isoform 4 of Phosphatidylinositol 3-kinase regulatory subunit alpha OS=Homo sapiens (Human) OX=9606 GN=PIK3R1 PE=1 SV=2	PIK3R1	0.558426	0.000965833	Yes	0.00627401	Yes	-3.12339
A0A087WTW9;A0A0A0MRA9;B7Z2N1;P49758;P49758-10;P497	NA	RGS6	0.59386	0.00096125	Yes	0.00627401	Yes	-3.12475
Q96PV0	>sp|Q96PV0|SYGP1_HUMAN Ras/Rap GTPase-activating protein SynGAP OS=Homo sapiens (Human) OX=9606 GN=SYNGAP1 PE=1 SV=4	SYNGAP1	0.671354	0.0009775	Yes	0.00627401	Yes	-3.11905
Q9UMX0;Q9UMX0-2	>sp|Q9UMX0|UBQL1_HUMAN Ubiquilin-1 OS=Homo sapiens (Human) OX=9606 GN=UBQLN1 PE=1 SV=2;>sp|Q9UMX0-2|UBQL1-2_HUMAN Isoform of Q9UMX0, Isoform 2 of Ubiquilin-1 OS=Homo sapiens (Human) OX=9606 GN=UBQLN1 PE=1 SV=2	UBQLN1	0.360966	0.000990833	Yes	0.0063254	Yes	-3.11323
Q96PU8;Q96PU8-3;Q96PU8-5;Q96PU8-6;Q96PU8-8;Q96PU8-	NA	QKI	1.77605	0.00101583	Yes	0.00645032	Yes	3.10492
H0YDD4;P10515	>tr|H0YDD4|H0YDD4_HUMAN Isoform of P10515, Acetyltransferase component of pyruvate dehydrogenase complex (Fragment) OS=Homo sapiens (Human) OX=9606 GN=DLAT PE=1 SV=1;>sp|P10515|ODP2_HUMAN Dihydrolipoyllysine-residue acetyltransferase component of pyruvate dehydrogenase complex, mitochondrial OS=Homo sapiens (Human) OX=9606 GN=DLAT PE=1 SV=3	DLAT	0.724421	0.00104625	Yes	0.00660812	Yes	-3.095
H0YIZ9;H0YJE3;Q6ZU80;Q6ZU80-1;Q6ZU80-3	>tr|H0YIZ9|H0YIZ9_HUMAN Isoform of Q6ZU80, Centrosomal protein of 128 kDa (Fragment) OS=Homo sapiens (Human) OX=9606 GN=CEP128 PE=1 SV=1;>tr|H0YJE3|H0YJE3_HUMAN Isoform of Q6ZU80, Centrosomal protein of 128 kDa (Fragment) OS=Homo sapiens (Human) OX=9606 GN=CEP128 PE=1 SV=1;>sp|Q6ZU80|CE128_HUMAN Centrosomal protein of 128 kDa OS=Homo sapiens (Human) OX=9606 GN=CEP128 PE=1 SV=2;>sp|Q6ZU80-1|CE128-…	CEP128	0.144825	0.00105333	Yes	0.00661766	Yes	-3.09299
G3V0G5;Q8IV38	>tr|G3V0G5|G3V0G5_HUMAN Isoform of Q8IV38, ANK_REP_REGION domain-containing protein OS=Homo sapiens (Human) OX=9606 GN=ANKMY2 PE=1 SV=1;>sp|Q8IV38|ANKY2_HUMAN Ankyrin repeat and MYND domain-containing protein 2 OS=Homo sapiens (Human) OX=9606 GN=ANKMY2 PE=1 SV=1	ANKMY2	0.506348	0.00107583	Yes	0.00672344	Yes	-3.08686
C9JQ42;G5E9W8;P46976;P46976-2;P46976-3	>tr|C9JQ42|C9JQ42_HUMAN Isoform of P46976, Glycogenin-1 (Fragment) OS=Homo sapiens (Human) OX=9606 GN=GYG1 PE=1 SV=8;>tr|G5E9W8|G5E9W8_HUMAN Isoform of P46976, Glycogenin 1, isoform CRA_e OS=Homo sapiens (Human) OX=9606 GN=GYG1 PE=1 SV=1;>sp|P46976|GLYG_HUMAN Glycogenin-1 OS=Homo sapiens (Human) OX=9606 GN=GYG1 PE=1 SV=4;>sp|P46976-2|GLYG-2_HUMAN Isoform of P46976, Isoform GN-1 of Glycogenin-1 OS…	GYG1	1.93377	0.0010875	Yes	0.00676077	Yes	3.08287
P40939	>sp|P40939|ECHA_HUMAN Trifunctional enzyme subunit alpha, mitochondrial OS=Homo sapiens (Human) OX=9606 GN=HADHA PE=1 SV=2	HADHA	1.62328	0.00115792	Yes	0.00712394	Yes	3.05824
P29401;P29401-2	>sp|P29401|TKT_HUMAN Transketolase OS=Homo sapiens (Human) OX=9606 GN=TKT PE=1 SV=3;>sp|P29401-2|TKT-2_HUMAN Isoform of P29401, Isoform 2 of Transketolase OS=Homo sapiens (Human) OX=9606 GN=TKT PE=1 SV=3	TKT	1.51484	0.00115458	Yes	0.00712394	Yes	3.05908
Q8IWA5;Q8IWA5-2;Q8IWA5-3	>sp|Q8IWA5|CTL2_HUMAN Choline transporter-like protein 2 OS=Homo sapiens (Human) OX=9606 GN=SLC44A2 PE=1 SV=3;>sp|Q8IWA5-2|CTL2-2_HUMAN Isoform of Q8IWA5, Isoform 2 of Choline transporter-like protein 2 OS=Homo sapiens (Human) OX=9606 GN=SLC44A2 PE=1 SV=3;>sp|Q8IWA5-3|CTL2-3_HUMAN Isoform of Q8IWA5, Isoform 3 of Choline transporter-like protein 2 OS=Homo sapiens (Human) OX=9606 GN=SLC44A2 PE=1 SV…	SLC44A2	2.02254	0.00117708	Yes	0.00720311	Yes	3.05312
Q9BUF5	>sp|Q9BUF5|TBB6_HUMAN Tubulin beta-6 chain OS=Homo sapiens (Human) OX=9606 GN=TUBB6 PE=1 SV=1	TUBB6	0.773483	0.00118292	Yes	0.00720311	Yes	-3.05147
Q10567;Q10567-2;Q10567-3	>sp|Q10567|AP1B1_HUMAN AP-1 complex subunit beta-1 OS=Homo sapiens (Human) OX=9606 GN=AP1B1 PE=1 SV=2;>sp|Q10567-2|AP1B1-2_HUMAN Isoform of Q10567, Isoform B of AP-1 complex subunit beta-1 OS=Homo sapiens (Human) OX=9606 GN=AP1B1 PE=1 SV=2;>sp|Q10567-3|AP1B1-3_HUMAN Isoform of Q10567, Isoform C of AP-1 complex subunit beta-1 OS=Homo sapiens (Human) OX=9606 GN=AP1B1 PE=1 SV=2	AP1B1	0.698553	0.00119458	Yes	0.00721391	Yes	-3.04927
Q8NBM8	>sp|Q8NBM8|PCYXL_HUMAN Prenylcysteine oxidase-like OS=Homo sapiens (Human) OX=9606 GN=PCYOX1L PE=1 SV=2	PCYOX1L	0.555192	0.00119917	Yes	0.00721391	Yes	-3.04763
Q8NBN7	>sp|Q8NBN7|RDH13_HUMAN Retinol dehydrogenase 13 OS=Homo sapiens (Human) OX=9606 GN=RDH13 PE=1 SV=2	RDH13	0.22197	0.00120292	Yes	0.00721391	Yes	-3.04606
Q01814-2;Q01814-3;Q01814-4;Q01814-7	>sp|Q01814-2|AT2B2-2_HUMAN Isoform of Q01814, Isoform WA of Plasma membrane calcium-transporting ATPase 2 OS=Homo sapiens (Human) OX=9606 GN=ATP2B2 PE=1 SV=2;>sp|Q01814-3|AT2B2-3_HUMAN Isoform of Q01814, Isoform YA of Plasma membrane calcium-transporting ATPase 2 OS=Homo sapiens (Human) OX=9606 GN=ATP2B2 PE=1 SV=2;>sp|Q01814-4|AT2B2-4_HUMAN Isoform of Q01814, Isoform ZA of Plasma membrane calcium…	ATP2B2	0.717897	0.00121125	Yes	0.0072234	Yes	-3.04354
E7EN95;O75369-7	>tr|E7EN95|E7EN95_HUMAN Isoform of O75369, Calponin-homology (CH) domain-containing protein OS=Homo sapiens (Human) OX=9606 GN=FLNB PE=1 SV=1;>sp|O75369-7|FLNB-7_HUMAN Isoform of O75369, Isoform 7 of Filamin-B OS=Homo sapiens (Human) OX=9606 GN=FLNB PE=1 SV=2	FLNB	2.46484	0.00121667	Yes	0.0072234	Yes	3.04074
O14548	>sp|O14548|COX7R_HUMAN Cytochrome c oxidase subunit 7A-related protein, mitochondrial OS=Homo sapiens (Human) OX=9606 GN=COX7A2L PE=1 SV=2	COX7A2L	0.664196	0.00126	Yes	0.0073945	Yes	-3.02833
F5GXC1;K7EQF2;Q8N3E9	>tr|F5GXC1|F5GXC1_HUMAN Isoform of Q8N3E9, PH domain-containing protein (Fragment) OS=Homo sapiens (Human) OX=9606 GN=PLCD3 PE=1 SV=1;>tr|K7EQF2|K7EQF2_HUMAN Isoform of Q8N3E9, PH domain-containing protein (Fragment) OS=Homo sapiens (Human) OX=9606 GN=PLCD3 PE=1 SV=1;>sp|Q8N3E9|PLCD3_HUMAN 1-phosphatidylinositol 4,5-bisphosphate phosphodiesterase delta-3 OS=Homo sapiens (Human) OX=9606 GN=PLCD3 P…	PLCD3	2.13887	0.00125917	Yes	0.0073945	Yes	3.02848
P53985	>sp|P53985|MOT1_HUMAN Monocarboxylate transporter 1 OS=Homo sapiens (Human) OX=9606 GN=SLC16A1 PE=1 SV=3	SLC16A1	1.94543	0.00126417	Yes	0.0073945	Yes	3.02745
P17655	>sp|P17655|CAN2_HUMAN Calpain-2 catalytic subunit OS=Homo sapiens (Human) OX=9606 GN=CAPN2 PE=1 SV=6	CAPN2	1.94637	0.00128083	Yes	0.00745526	Yes	3.02337
Q9H0E2	>sp|Q9H0E2|TOLIP_HUMAN Toll-interacting protein OS=Homo sapiens (Human) OX=9606 GN=TOLLIP PE=1 SV=1	TOLLIP	0.723083	0.00128917	Yes	0.00746716	Yes	-3.02053
P61266;P61266-2	>sp|P61266|STX1B_HUMAN Syntaxin-1B OS=Homo sapiens (Human) OX=9606 GN=STX1B PE=1 SV=1;>sp|P61266-2|STX1B-2_HUMAN Isoform of P61266, Isoform 2 of Syntaxin-1B OS=Homo sapiens (Human) OX=9606 GN=STX1B PE=1 SV=1	STX1B	0.708437	0.00130542	Yes	0.00752458	Yes	-3.01602
Q5HYI7	>sp|Q5HYI7|MTX3_HUMAN Metaxin-3 OS=Homo sapiens (Human) OX=9606 GN=MTX3 PE=1 SV=2	MTX3	0.508613	0.00132292	Yes	0.00758861	Yes	-3.0105
C9JA33;Q8IXS6;Q8IXS6-2	>tr|C9JA33|C9JA33_HUMAN Isoform of Q8IXS6, Paralemmin-2 OS=Homo sapiens (Human) OX=9606 GN=PALM2 PE=1 SV=1;>sp|Q8IXS6|PALM2_HUMAN Paralemmin-2 OS=Homo sapiens (Human) OX=9606 GN=PALM2 PE=1 SV=3;>sp|Q8IXS6-2|PALM2-2_HUMAN Isoform of Q8IXS6, Isoform 2 of Paralemmin-2 OS=Homo sapiens (Human) OX=9606 GN=PALM2 PE=1 SV=3	PALM2	0.457713	0.00133917	Yes	0.00760832	Yes	-3.00618
Q15388	>sp|Q15388|TOM20_HUMAN Mitochondrial import receptor subunit TOM20 homolog OS=Homo sapiens (Human) OX=9606 GN=TOMM20 PE=1 SV=1	TOMM20	0.586242	0.00133792	Yes	0.00760832	Yes	-3.00645
M0QZJ5;Q9BV35;Q9BV35-2;Q9BV35-3;Q9BV35-4	>tr|M0QZJ5|M0QZJ5_HUMAN Isoform of Q9BV35, Calcium-binding mitochondrial carrier protein SCaMC-3 (Fragment) OS=Homo sapiens (Human) OX=9606 GN=SLC25A23 PE=1 SV=1;>sp|Q9BV35|SCMC3_HUMAN Calcium-binding mitochondrial carrier protein SCaMC-3 OS=Homo sapiens (Human) OX=9606 GN=SLC25A23 PE=1 SV=2;>sp|Q9BV35-2|SCMC3-2_HUMAN Isoform of Q9BV35, Isoform 2 of Calcium-binding mitochondrial carrier protein S…	SLC25A23	0.564222	0.00135125	Yes	0.00764041	Yes	-3.00275
O43707	>sp|O43707|ACTN4_HUMAN Alpha-actinin-4 OS=Homo sapiens (Human) OX=9606 GN=ACTN4 PE=1 SV=2	ACTN4	0.743808	0.00139125	Yes	0.00781433	Yes	-2.9914
P68402	>sp|P68402|PA1B2_HUMAN Platelet-activating factor acetylhydrolase IB subunit beta OS=Homo sapiens (Human) OX=9606 GN=PAFAH1B2 PE=1 SV=1	PAFAH1B2	1.99367	0.00140667	Yes	0.00781433	Yes	2.98666
P17252	>sp|P17252|KPCA_HUMAN Protein kinase C alpha type OS=Homo sapiens (Human) OX=9606 GN=PRKCA PE=1 SV=4	PRKCA	1.4864	0.00140833	Yes	0.00781433	Yes	2.98606
Q9Y490	>sp|Q9Y490|TLN1_HUMAN Talin-1 OS=Homo sapiens (Human) OX=9606 GN=TLN1 PE=1 SV=3	TLN1	1.95816	0.00139875	Yes	0.00781433	Yes	2.98879
O00330;O00330-3	>sp|O00330|ODPX_HUMAN Pyruvate dehydrogenase protein X component, mitochondrial OS=Homo sapiens (Human) OX=9606 GN=PDHX PE=1 SV=3;>sp|O00330-3|ODPX-3_HUMAN Isoform of O00330, Isoform 3 of Pyruvate dehydrogenase protein X component, mitochondrial OS=Homo sapiens (Human) OX=9606 GN=PDHX PE=1 SV=3	PDHX	0.628343	0.00144875	Yes	0.0080012	Yes	-2.97656
P15170-2;P15170-3	>sp|P15170-2|ERF3A-2_HUMAN Isoform of P15170, Isoform 2 of Eukaryotic peptide chain release factor GTP-binding subunit ERF3A OS=Homo sapiens (Human) OX=9606 GN=GSPT1 PE=1 SV=1;>sp|P15170-3|ERF3A-3_HUMAN Isoform of P15170, Isoform 3 of Eukaryotic peptide chain release factor GTP-binding subunit ERF3A OS=Homo sapiens (Human) OX=9606 GN=GSPT1 PE=1 SV=1	GSPT1	2.79108	0.00146042	Yes	0.00802829	Yes	2.97404
B4DQI4;F8W9U3;Q96IU4	>tr|B4DQI4|B4DQI4_HUMAN Isoform of Q96IU4, AB hydrolase-1 domain-containing protein OS=Homo sapiens (Human) OX=9606 GN=ABHD14B PE=1 SV=1;>tr|F8W9U3|F8W9U3_HUMAN Isoform of Q96IU4, AB hydrolase-1 domain-containing protein OS=Homo sapiens (Human) OX=9606 GN=ABHD14B PE=1 SV=1;>sp|Q96IU4|ABHEB_HUMAN Protein ABHD14B OS=Homo sapiens (Human) OX=9606 GN=ABHD14B PE=1 SV=1	ABHD14B	2.56366	0.0014775	Yes	0.00808478	Yes	2.97081
P31930	>sp|P31930|QCR1_HUMAN Cytochrome b-c1 complex subunit 1, mitochondrial OS=Homo sapiens (Human) OX=9606 GN=UQCRC1 PE=1 SV=3	UQCRC1	0.76695	0.001485	Yes	0.00808854	Yes	-2.96928
Q92974;Q92974-2;Q92974-3;V9GYM8	>sp|Q92974|ARHG2_HUMAN Rho guanine nucleotide exchange factor 2 OS=Homo sapiens (Human) OX=9606 GN=ARHGEF2 PE=1 SV=4;>sp|Q92974-2|ARHG2-2_HUMAN Isoform of Q92974, Isoform 2 of Rho guanine nucleotide exchange factor 2 OS=Homo sapiens (Human) OX=9606 GN=ARHGEF2 PE=1 SV=4;>sp|Q92974-3|ARHG2-3_HUMAN Isoform of Q92974, Isoform 3 of Rho guanine nucleotide exchange factor 2 OS=Homo sapiens (Human) OX=96…	ARHGEF2	0.690622	0.00152792	Yes	0.00820933	Yes	-2.95991
Q9UI12;Q9UI12-2	>sp|Q9UI12|VATH_HUMAN V-type proton ATPase subunit H OS=Homo sapiens (Human) OX=9606 GN=ATP6V1H PE=1 SV=1;>sp|Q9UI12-2|VATH-2_HUMAN Isoform of Q9UI12, Isoform 2 of V-type proton ATPase subunit H OS=Homo sapiens (Human) OX=9606 GN=ATP6V1H PE=1 SV=1	ATP6V1H	0.776769	0.00152542	Yes	0.00820933	Yes	-2.96054
F8W726;Q14157;Q14157-1;Q14157-3;Q14157-4;Q14157-5	>tr|F8W726|F8W726_HUMAN Isoform of Q14157, UBA domain-containing protein OS=Homo sapiens (Human) OX=9606 GN=UBAP2L PE=1 SV=2;>sp|Q14157|UBP2L_HUMAN Ubiquitin-associated protein 2-like OS=Homo sapiens (Human) OX=9606 GN=UBAP2L PE=1 SV=2;>sp|Q14157-1|UBP2L-1_HUMAN Isoform of Q14157, Isoform 2 of Ubiquitin-associated protein 2-like OS=Homo sapiens (Human) OX=9606 GN=UBAP2L PE=1 SV=2;>sp|Q14157-3|UBP…	UBAP2L	0.243689	0.00152458	Yes	0.00820933	Yes	-2.9608
O00299	>sp|O00299|CLIC1_HUMAN Chloride intracellular channel protein 1 OS=Homo sapiens (Human) OX=9606 GN=CLIC1 PE=1 SV=4	CLIC1	2.37336	0.00155875	Yes	0.00833727	Yes	2.95278
O14994	>sp|O14994|SYN3_HUMAN Synapsin-3 OS=Homo sapiens (Human) OX=9606 GN=SYN3 PE=1 SV=2	SYN3	0.523838	0.0015775	Yes	0.00839972	Yes	-2.94878
P08559;P08559-2;P08559-3;P08559-4	>sp|P08559|ODPA_HUMAN Pyruvate dehydrogenase E1 component subunit alpha, somatic form, mitochondrial OS=Homo sapiens (Human) OX=9606 GN=PDHA1 PE=1 SV=3;>sp|P08559-2|ODPA-2_HUMAN Isoform of P08559, Isoform 2 of Pyruvate dehydrogenase E1 component subunit alpha, somatic form, mitochondrial OS=Homo sapiens (Human) OX=9606 GN=PDHA1 PE=1 SV=3;>sp|P08559-3|ODPA-3_HUMAN Isoform of P08559, Isoform 3 of P…	PDHA1	0.731351	0.00159208	Yes	0.00843953	Yes	-2.946
Q06830	>sp|Q06830|PRDX1_HUMAN Peroxiredoxin-1 OS=Homo sapiens (Human) OX=9606 GN=PRDX1 PE=1 SV=1	PRDX1	1.54883	0.00161083	Yes	0.00850097	Yes	2.94083
Q13740-2	>sp|Q13740-2|CD166-2_HUMAN Isoform of Q13740, Isoform 2 of CD166 antigen OS=Homo sapiens (Human) OX=9606 GN=ALCAM PE=1 SV=2	ALCAM	1.47935	0.00162	Yes	0.00851151	Yes	2.93924
P11177;P11177-2	>sp|P11177|ODPB_HUMAN Pyruvate dehydrogenase E1 component subunit beta, mitochondrial OS=Homo sapiens (Human) OX=9606 GN=PDHB PE=1 SV=3;>sp|P11177-2|ODPB-2_HUMAN Isoform of P11177, Isoform 2 of Pyruvate dehydrogenase E1 component subunit beta, mitochondrial OS=Homo sapiens (Human) OX=9606 GN=PDHB PE=1 SV=3	PDHB	0.686583	0.00162833	Yes	0.00851761	Yes	-2.93737
P49748;P49748-2;P49748-3	>sp|P49748|ACADV_HUMAN Very long-chain specific acyl-CoA dehydrogenase, mitochondrial OS=Homo sapiens (Human) OX=9606 GN=ACADVL PE=1 SV=1;>sp|P49748-2|ACADV-2_HUMAN Isoform of P49748, Isoform 2 of Very long-chain specific acyl-CoA dehydrogenase, mitochondrial OS=Homo sapiens (Human) OX=9606 GN=ACADVL PE=1 SV=1;>sp|P49748-3|ACADV-3_HUMAN Isoform of P49748, Isoform 3 of Very long-chain specific acy…	ACADVL	1.54801	0.00163667	Yes	0.00852365	Yes	2.93593
Q9P2R3;Q9P2R3-2;Q9P2R3-4	>sp|Q9P2R3|ANFY1_HUMAN Rabankyrin-5 OS=Homo sapiens (Human) OX=9606 GN=ANKFY1 PE=1 SV=2;>sp|Q9P2R3-2|ANFY1-2_HUMAN Isoform of Q9P2R3, Isoform 2 of Rabankyrin-5 OS=Homo sapiens (Human) OX=9606 GN=ANKFY1 PE=1 SV=2;>sp|Q9P2R3-4|ANFY1-4_HUMAN Isoform of Q9P2R3, Isoform 4 of Rabankyrin-5 OS=Homo sapiens (Human) OX=9606 GN=ANKFY1 PE=1 SV=2	ANKFY1	1.40697	0.00174	Yes	0.00895054	Yes	2.9161
A8MRA7;I3L448;Q5TC12	>tr|A8MRA7|A8MRA7_HUMAN Isoform of Q5TC12, ATP synthase mitochondrial F1 complex assembly factor 1 OS=Homo sapiens (Human) OX=9606 GN=ATPAF1 PE=1 SV=2;>tr|I3L448|I3L448_HUMAN Isoform of Q5TC12, ATP synthase mitochondrial F1 complex assembly factor 1 OS=Homo sapiens (Human) OX=9606 GN=ATPAF1 PE=1 SV=1;>sp|Q5TC12|ATPF1_HUMAN ATP synthase mitochondrial F1 complex assembly factor 1 OS=Homo sapiens (H…	ATPAF1	0.560972	0.00173375	Yes	0.00895054	Yes	-2.91758
E9PMM3;E9PQW0;Q9Y5Y5;Q9Y5Y5-2	>tr|E9PMM3|E9PMM3_HUMAN Isoform of Q9Y5Y5, Peroxisomal membrane protein PEX16 (Fragment) OS=Homo sapiens (Human) OX=9606 GN=PEX16 PE=1 SV=1;>tr|E9PQW0|E9PQW0_HUMAN Isoform of Q9Y5Y5, Peroxisomal membrane protein PEX16 OS=Homo sapiens (Human) OX=9606 GN=PEX16 PE=1 SV=1;>sp|Q9Y5Y5|PEX16_HUMAN Peroxisomal membrane protein PEX16 OS=Homo sapiens (Human) OX=9606 GN=PEX16 PE=1 SV=2;>sp|Q9Y5Y5-2|PEX16-2_…	PEX16	0.290504	0.00174125	Yes	0.00895054	Yes	-2.91586
P49418	>sp|P49418|AMPH_HUMAN Amphiphysin OS=Homo sapiens (Human) OX=9606 GN=AMPH PE=1 SV=1	AMPH	0.685346	0.00175875	Yes	0.00900153	Yes	-2.91089
Q8N573-8	>sp|Q8N573-8|OXR1-8_HUMAN Isoform of Q8N573, Isoform 8 of Oxidation resistance protein 1 OS=Homo sapiens (Human) OX=9606 GN=OXR1 PE=1 SV=2	OXR1	0.683933	0.00177208	Yes	0.00903085	Yes	-2.90833
Q7L099;Q7L099-2;Q7L099-3;Q7L099-4	>sp|Q7L099|RUFY3_HUMAN Protein RUFY3 OS=Homo sapiens (Human) OX=9606 GN=RUFY3 PE=1 SV=1;>sp|Q7L099-2|RUFY3-2_HUMAN Isoform of Q7L099, Isoform 2 of Protein RUFY3 OS=Homo sapiens (Human) OX=9606 GN=RUFY3 PE=1 SV=1;>sp|Q7L099-3|RUFY3-3_HUMAN Isoform of Q7L099, Isoform 3 of Protein RUFY3 OS=Homo sapiens (Human) OX=9606 GN=RUFY3 PE=1 SV=1;>sp|Q7L099-4|RUFY3-4_HUMAN Isoform of Q7L099, Isoform 4 of Prot…	RUFY3	0.75401	0.00178292	Yes	0.00904723	Yes	-2.90661
O75379;O75379-2	>sp|O75379|VAMP4_HUMAN Vesicle-associated membrane protein 4 OS=Homo sapiens (Human) OX=9606 GN=VAMP4 PE=1 SV=2;>sp|O75379-2|VAMP4-2_HUMAN Isoform of O75379, Isoform 2 of Vesicle-associated membrane protein 4 OS=Homo sapiens (Human) OX=9606 GN=VAMP4 PE=1 SV=2	VAMP4	0.401416	0.00180167	Yes	0.00910347	Yes	-2.90284
Q00796	>sp|Q00796|DHSO_HUMAN Sorbitol dehydrogenase OS=Homo sapiens (Human) OX=9606 GN=SORD PE=1 SV=4	SORD	3.65286	0.00183417	Yes	0.00922841	Yes	2.89526
A0A087X1X9;Q8IYB5;Q8IYB5-2;Q8IYB5-3	>tr|A0A087X1X9|A0A087X1X9_HUMAN Isoform of Q8IYB5, Arf-GAP domain-containing protein OS=Homo sapiens (Human) OX=9606 GN=SMAP1 PE=1 SV=1;>sp|Q8IYB5|SMAP1_HUMAN Stromal membrane-associated protein 1 OS=Homo sapiens (Human) OX=9606 GN=SMAP1 PE=1 SV=2;>sp|Q8IYB5-2|SMAP1-2_HUMAN Isoform of Q8IYB5, Isoform 2 of Stromal membrane-associated protein 1 OS=Homo sapiens (Human) OX=9606 GN=SMAP1 PE=1 SV=2;>sp…	SMAP1	0.667731	0.00185833	Yes	0.00931055	Yes	-2.89163
Q9BS92	>sp|Q9BS92|NPS3B_HUMAN Protein NipSnap homolog 3B OS=Homo sapiens (Human) OX=9606 GN=NIPSNAP3B PE=2 SV=1	NIPSNAP3B	0.344069	0.00186917	Yes	0.00932548	Yes	-2.89012
Q99614	>sp|Q99614|TTC1_HUMAN Tetratricopeptide repeat protein 1 OS=Homo sapiens (Human) OX=9606 GN=TTC1 PE=1 SV=1	TTC1	0.632089	0.00189625	Yes	0.00942102	Yes	-2.8858
P21283	>sp|P21283|VATC1_HUMAN V-type proton ATPase subunit C 1 OS=Homo sapiens (Human) OX=9606 GN=ATP6V1C1 PE=1 SV=4	ATP6V1C1	0.758216	0.00193542	Yes	0.00942871	Yes	-2.87763
A0A087WYJ6;P42263	>tr|A0A087WYJ6|A0A087WYJ6_HUMAN Isoform of P42263, Glutamate receptor 3 OS=Homo sapiens (Human) OX=9606 GN=GRIA3 PE=1 SV=1;>sp|P42263|GRIA3_HUMAN Glutamate receptor 3 OS=Homo sapiens (Human) OX=9606 GN=GRIA3 PE=1 SV=2	GRIA3	0.671274	0.00191417	Yes	0.00942871	Yes	-2.88269
P28482	>sp|P28482|MK01_HUMAN Mitogen-activated protein kinase 1 OS=Homo sapiens (Human) OX=9606 GN=MAPK1 PE=1 SV=3	MAPK1	1.41459	0.00193333	Yes	0.00942871	Yes	2.87822
O43815;O43815-2	>sp|O43815|STRN_HUMAN Striatin OS=Homo sapiens (Human) OX=9606 GN=STRN PE=1 SV=4;>sp|O43815-2|STRN-2_HUMAN Isoform of O43815, Isoform 2 of Striatin OS=Homo sapiens (Human) OX=9606 GN=STRN PE=1 SV=4	STRN	0.745006	0.00192667	Yes	0.00942871	Yes	-2.8799
P37802;P37802-2	>sp|P37802|TAGL2_HUMAN Transgelin-2 OS=Homo sapiens (Human) OX=9606 GN=TAGLN2 PE=1 SV=3;>sp|P37802-2|TAGL2-2_HUMAN Isoform of P37802, Isoform 2 of Transgelin-2 OS=Homo sapiens (Human) OX=9606 GN=TAGLN2 PE=1 SV=3	TAGLN2	1.96655	0.0019375	Yes	0.00942871	Yes	2.87715
Q9H3Q1;Q9H3Q1-2	>sp|Q9H3Q1|BORG4_HUMAN Cdc42 effector protein 4 OS=Homo sapiens (Human) OX=9606 GN=CDC42EP4 PE=1 SV=1;>sp|Q9H3Q1-2|BORG4-2_HUMAN Isoform of Q9H3Q1, Isoform 2 of Cdc42 effector protein 4 OS=Homo sapiens (Human) OX=9606 GN=CDC42EP4 PE=1 SV=1	CDC42EP4	1.8522	0.00196042	Yes	0.00946642	Yes	2.87253
P54652	>sp|P54652|HSP72_HUMAN Heat shock-related 70 kDa protein 2 OS=Homo sapiens (Human) OX=9606 GN=HSPA2 PE=1 SV=1	HSPA2	1.80296	0.00196917	Yes	0.00946642	Yes	2.87063
Q16795	>sp|Q16795|NDUA9_HUMAN NADH dehydrogenase [ubiquinone] 1 alpha subcomplex subunit 9, mitochondrial OS=Homo sapiens (Human) OX=9606 GN=NDUFA9 PE=1 SV=2	NDUFA9	0.631583	0.00196833	Yes	0.00946642	Yes	-2.87069
P00505	>sp|P00505|AATM_HUMAN Aspartate aminotransferase, mitochondrial OS=Homo sapiens (Human) OX=9606 GN=GOT2 PE=1 SV=3	GOT2	0.728574	0.00200875	Yes	0.00961777	Yes	-2.86338
F8VVT9;J3KNM6	>tr|F8VVT9|F8VVT9_HUMAN Isoform of Q99490, Arf-GAP with GTPase, ANK repeat and PH domain-containing protein 2 OS=Homo sapiens (Human) OX=9606 GN=AGAP2 PE=1 SV=1;>tr|J3KNM6|J3KNM6_HUMAN Isoform of Q99490, Arf-GAP with GTPase, ANK repeat and PH domain-containing protein 2 (Fragment) OS=Homo sapiens (Human) OX=9606 GN=AGAP2 PE=1 SV=1	AGAP2	0.699754	0.00211833	Yes	0.0100567	Yes	-2.84516
O75146	>sp|O75146|HIP1R_HUMAN Huntingtin-interacting protein 1-related protein OS=Homo sapiens (Human) OX=9606 GN=HIP1R PE=1 SV=2	HIP1R	1.45073	0.00212583	Yes	0.0100567	Yes	2.84405
A0A0A0MRM8;E7EW20;Q9UM54;Q9UM54-1;Q9UM54-2;Q9UM54-	NA	MYO6	1.58652	0.00211333	Yes	0.0100567	Yes	2.84581
P15121	>sp|P15121|ALDR_HUMAN Aldo-keto reductase family 1 member B1 OS=Homo sapiens (Human) OX=9606 GN=AKR1B1 PE=1 SV=3	AKR1B1	3.02436	0.00214542	Yes	0.0101091	Yes	2.84163
P10636-4	>sp|P10636-4|TAU-4_HUMAN Isoform of P10636, Isoform Tau-B of Microtubule-associated protein tau OS=Homo sapiens (Human) OX=9606 GN=MAPT PE=1 SV=5	MAPT	0.612538	0.00220417	Yes	0.0102637	Yes	-2.83317
Q9UMS4	>sp|Q9UMS4|PRP19_HUMAN Pre-mRNA-processing factor 19 OS=Homo sapiens (Human) OX=9606 GN=PRPF19 PE=1 SV=1	PRPF19	0.580275	0.00219375	Yes	0.0102637	Yes	-2.835
H3BM38;H3BNE1;H3BPJ0;H3BR18;O00161;O00161-2	>tr|H3BM38|H3BM38_HUMAN Isoform of O00161, Synaptosomal-associated protein (Fragment) OS=Homo sapiens (Human) OX=9606 GN=SNAP23 PE=1 SV=1;>tr|H3BNE1|H3BNE1_HUMAN Isoform of O00161, t-SNARE coiled-coil homology domain-containing protein OS=Homo sapiens (Human) OX=9606 GN=SNAP23 PE=1 SV=1;>tr|H3BPJ0|H3BPJ0_HUMAN Isoform of O00161, t-SNARE coiled-coil homology domain-containing protein OS=Homo sapie…	SNAP23	1.6154	0.00219833	Yes	0.0102637	Yes	2.83409
Q9HCM2	>sp|Q9HCM2|PLXA4_HUMAN Plexin-A4 OS=Homo sapiens (Human) OX=9606 GN=PLXNA4 PE=1 SV=4	PLXNA4	0.695153	0.00223875	Yes	0.010384	Yes	-2.82831
F8VWM7	>tr|F8VWM7|F8VWM7_HUMAN Sodium channel protein type 8 subunit alpha OS=Homo sapiens GN=SCN8A PE=4 SV=1	SCN8A	0.497127	0.002255	Yes	0.0104187	Yes	-2.82561
H0Y507;Q5TCZ1;Q5TCZ1-2;Q5TCZ1-3	>tr|H0Y507|H0Y507_HUMAN Isoform of Q5TCZ1, SH3 and PX domain-containing protein 2A (Fragment) OS=Homo sapiens (Human) OX=9606 GN=SH3PXD2A PE=1 SV=1;>sp|Q5TCZ1|SPD2A_HUMAN SH3 and PX domain-containing protein 2A OS=Homo sapiens (Human) OX=9606 GN=SH3PXD2A PE=1 SV=1;>sp|Q5TCZ1-2|SPD2A-2_HUMAN Isoform of Q5TCZ1, Isoform 2 of SH3 and PX domain-containing protein 2A OS=Homo sapiens (Human) OX=9606 GN=…	SH3PXD2A	2.52086	0.00228375	Yes	0.0105106	Yes	2.82175
Q01813	>sp|Q01813|PFKAP_HUMAN ATP-dependent 6-phosphofructokinase, platelet type OS=Homo sapiens (Human) OX=9606 GN=PFKP PE=1 SV=2	PFKP	0.673377	0.00229708	Yes	0.0105312	Yes	-2.81971
P25705	>sp|P25705|ATPA_HUMAN ATP synthase subunit alpha, mitochondrial OS=Homo sapiens (Human) OX=9606 GN=ATP5F1A PE=1 SV=1	ATP5F1A	0.70461	0.00237208	Yes	0.0108332	Yes	-2.80951
Q8TF44	>sp|Q8TF44|C2C4C_HUMAN C2 calcium-dependent domain-containing protein 4C OS=Homo sapiens (Human) OX=9606 GN=C2CD4C PE=1 SV=2	C2CD4C	0.609457	0.00239042	Yes	0.0108751	Yes	-2.80631
P20674	>sp|P20674|COX5A_HUMAN Cytochrome c oxidase subunit 5A, mitochondrial OS=Homo sapiens (Human) OX=9606 GN=COX5A PE=1 SV=2	COX5A	0.666326	0.00240167	Yes	0.0108846	Yes	-2.80427
Q09666	>sp|Q09666|AHNK_HUMAN Neuroblast differentiation-associated protein AHNAK OS=Homo sapiens (Human) OX=9606 GN=AHNAK PE=1 SV=2	AHNAK	2.42343	0.00243	Yes	0.0109633	Yes	2.80024
P10301	>sp|P10301|RRAS_HUMAN Ras-related protein R-Ras OS=Homo sapiens (Human) OX=9606 GN=RRAS PE=1 SV=1	RRAS	1.77023	0.0024375	Yes	0.0109633	Yes	2.79913
B0QZ18;F2Z2V0;Q99829	>tr|B0QZ18|B0QZ18_HUMAN Isoform of Q99829, C2 domain-containing protein OS=Homo sapiens (Human) OX=9606 GN=CPNE1 PE=1 SV=1;>tr|F2Z2V0|F2Z2V0_HUMAN Isoform of Q99829, C2 domain-containing protein (Fragment) OS=Homo sapiens (Human) OX=9606 GN=CPNE1 PE=1 SV=1;>sp|Q99829|CPNE1_HUMAN Copine-1 OS=Homo sapiens (Human) OX=9606 GN=CPNE1 PE=1 SV=1	CPNE1	2.73486	0.00247208	Yes	0.0110769	Yes	2.79354
P11216	>sp|P11216|PYGB_HUMAN Glycogen phosphorylase, brain form OS=Homo sapiens (Human) OX=9606 GN=PYGB PE=1 SV=5	PYGB	1.49719	0.002485	Yes	0.0110929	Yes	2.79166
Q9UNA1;Q9UNA1-2	>sp|Q9UNA1|RHG26_HUMAN Rho GTPase-activating protein 26 OS=Homo sapiens (Human) OX=9606 GN=ARHGAP26 PE=1 SV=1;>sp|Q9UNA1-2|RHG26-2_HUMAN Isoform of Q9UNA1, Isoform 2 of Rho GTPase-activating protein 26 OS=Homo sapiens (Human) OX=9606 GN=ARHGAP26 PE=1 SV=1	ARHGAP26	0.66556	0.00259375	Yes	0.011535	Yes	-2.77658
H3BLU7;O43488	>tr|H3BLU7|H3BLU7_HUMAN Isoform of O43488, Aflatoxin B1 aldehyde reductase member 2 (Fragment) OS=Homo sapiens (Human) OX=9606 GN=AKR7A2 PE=1 SV=1;>sp|O43488|ARK72_HUMAN Aflatoxin B1 aldehyde reductase member 2 OS=Homo sapiens (Human) OX=9606 GN=AKR7A2 PE=1 SV=3	AKR7A2	2.13674	0.00267625	Yes	0.0118575	Yes	2.76546
P43897	>sp|P43897|EFTS_HUMAN Elongation factor Ts, mitochondrial OS=Homo sapiens (Human) OX=9606 GN=TSFM PE=1 SV=2	TSFM	0.695686	0.00278	Yes	0.0122714	Yes	-2.75222
A6NIZ0;Q9GZM8;Q9GZM8-2;Q9GZM8-3	>tr|A6NIZ0|A6NIZ0_HUMAN Isoform of Q9GZM8, NUDE_C domain-containing protein OS=Homo sapiens (Human) OX=9606 GN=NDEL1 PE=1 SV=4;>sp|Q9GZM8|NDEL1_HUMAN Nuclear distribution protein nudE-like 1 OS=Homo sapiens (Human) OX=9606 GN=NDEL1 PE=1 SV=1;>sp|Q9GZM8-2|NDEL1-2_HUMAN Isoform of Q9GZM8, Isoform 2 of Nuclear distribution protein nudE-like 1 OS=Homo sapiens (Human) OX=9606 GN=NDEL1 PE=1 SV=1;>sp|Q9…	NDEL1	0.513046	0.00281375	Yes	0.0123743	Yes	-2.74807
P10606	>sp|P10606|COX5B_HUMAN Cytochrome c oxidase subunit 5B, mitochondrial OS=Homo sapiens (Human) OX=9606 GN=COX5B PE=1 SV=2	COX5B	0.664874	0.00287083	Yes	0.0125526	Yes	-2.74163
E7ESK9;Q9Y2G0;Q9Y2G0-3	>tr|E7ESK9|E7ESK9_HUMAN Isoform of Q9Y2G0, Protein EFR3 homolog B OS=Homo sapiens (Human) OX=9606 GN=EFR3B PE=1 SV=1;>sp|Q9Y2G0|EFR3B_HUMAN Protein EFR3 homolog B OS=Homo sapiens (Human) OX=9606 GN=EFR3B PE=1 SV=2;>sp|Q9Y2G0-3|EFR3B-3_HUMAN Isoform of Q9Y2G0, Isoform 3 of Protein EFR3 homolog B OS=Homo sapiens (Human) OX=9606 GN=EFR3B PE=1 SV=2	EFR3B	0.696714	0.00287542	Yes	0.0125526	Yes	-2.74092
Q9Y5L4	>sp|Q9Y5L4|TIM13_HUMAN Mitochondrial import inner membrane translocase subunit Tim13 OS=Homo sapiens (Human) OX=9606 GN=TIMM13 PE=1 SV=1	TIMM13	0.33205	0.00291292	Yes	0.0126697	Yes	-2.73642
J3KRE2;P52565	>tr|J3KRE2|J3KRE2_HUMAN Isoform of P52565, Rho GDP-dissociation inhibitor 1 OS=Homo sapiens (Human) OX=9606 GN=ARHGDIA PE=1 SV=1;>sp|P52565|GDIR1_HUMAN Rho GDP-dissociation inhibitor 1 OS=Homo sapiens (Human) OX=9606 GN=ARHGDIA PE=1 SV=3	ARHGDIA	3.10698	0.0029325	Yes	0.0127071	Yes	2.73373
O95336	>sp|O95336|6PGL_HUMAN 6-phosphogluconolactonase OS=Homo sapiens (Human) OX=9606 GN=PGLS PE=1 SV=2	PGLS	1.67246	0.00294292	Yes	0.0127071	Yes	2.73251
P09110	>sp|P09110|THIK_HUMAN 3-ketoacyl-CoA thiolase, peroxisomal OS=Homo sapiens (Human) OX=9606 GN=ACAA1 PE=1 SV=2	ACAA1	2.19053	0.00298583	Yes	0.0128457	Yes	2.72768
Q9BUT1	>sp|Q9BUT1|BDH2_HUMAN 3-hydroxybutyrate dehydrogenase type 2 OS=Homo sapiens (Human) OX=9606 GN=BDH2 PE=1 SV=2	BDH2	2.13229	0.003035	Yes	0.0129168	Yes	2.72183
Q8WW22;Q8WW22-2;Q8WW22-3	>sp|Q8WW22|DNJA4_HUMAN DnaJ homolog subfamily A member 4 OS=Homo sapiens (Human) OX=9606 GN=DNAJA4 PE=1 SV=1;>sp|Q8WW22-2|DNJA4-2_HUMAN Isoform of Q8WW22, Isoform 2 of DnaJ homolog subfamily A member 4 OS=Homo sapiens (Human) OX=9606 GN=DNAJA4 PE=1 SV=1;>sp|Q8WW22-3|DNJA4-3_HUMAN Isoform of Q8WW22, Isoform 3 of DnaJ homolog subfamily A member 4 OS=Homo sapiens (Human) OX=9606 GN=DNAJA4 PE=1 SV=1	DNAJA4	0.412609	0.00302625	Yes	0.0129168	Yes	-2.72305
A0A096LPA6	>tr|A0A096LPA6|A0A096LPA6_HUMAN Isoform of O60518, Ran-binding protein 6 (Fragment) OS=Homo sapiens (Human) OX=9606 GN=RANBP6 PE=1 SV=1	RANBP6	0.606629	0.00301375	Yes	0.0129168	Yes	-2.72461
Q8WXS5	>sp|Q8WXS5|CCG8_HUMAN Voltage-dependent calcium channel gamma-8 subunit OS=Homo sapiens (Human) OX=9606 GN=CACNG8 PE=2 SV=3	CACNG8	0.251846	0.00305583	Yes	0.012959	Yes	-2.71911
A0A087WUT8;O95196;O95196-2	>tr|A0A087WUT8|A0A087WUT8_HUMAN Isoform of O95196, Chon_Sulph_att domain-containing protein OS=Homo sapiens (Human) OX=9606 GN=CSPG5 PE=1 SV=1;>sp|O95196|CSPG5_HUMAN Chondroitin sulfate proteoglycan 5 OS=Homo sapiens (Human) OX=9606 GN=CSPG5 PE=1 SV=3;>sp|O95196-2|CSPG5-2_HUMAN Isoform of O95196, Isoform 2 of Chondroitin sulfate proteoglycan 5 OS=Homo sapiens (Human) OX=9606 GN=CSPG5 PE=1 SV=3	CSPG5	0.697009	0.00308708	Yes	0.0130449	Yes	-2.71556
E7EX44;E9PGZ1;Q05682;Q05682-2;Q05682-3;Q05682-4;Q0	NA	CALD1	2.0766	0.00312708	Yes	0.0131671	Yes	2.71158
Q96JE9	>sp|Q96JE9|MAP6_HUMAN Microtubule-associated protein 6 OS=Homo sapiens (Human) OX=9606 GN=MAP6 PE=1 SV=2	MAP6	0.660427	0.0032175	Yes	0.0135	Yes	-2.70301
Q7L576	>sp|Q7L576|CYFP1_HUMAN Cytoplasmic FMR1-interacting protein 1 OS=Homo sapiens (Human) OX=9606 GN=CYFIP1 PE=1 SV=1	CYFIP1	1.55151	0.00328958	Yes	0.0135782	Yes	2.69519
P45985;P45985-2	>sp|P45985|MP2K4_HUMAN Dual specificity mitogen-activated protein kinase kinase 4 OS=Homo sapiens (Human) OX=9606 GN=MAP2K4 PE=1 SV=1;>sp|P45985-2|MP2K4-2_HUMAN Isoform of P45985, Isoform 2 of Dual specificity mitogen-activated protein kinase kinase 4 OS=Homo sapiens (Human) OX=9606 GN=MAP2K4 PE=1 SV=1	MAP2K4	0.595304	0.00327708	Yes	0.0135782	Yes	-2.6968
O14495	>sp|O14495|PLPP3_HUMAN Phospholipid phosphatase 3 OS=Homo sapiens (Human) OX=9606 GN=PLPP3 PE=1 SV=1	PLPP3	1.9326	0.00327667	Yes	0.0135782	Yes	2.69684
P68371	>sp|P68371|TBB4B_HUMAN Tubulin beta-4B chain OS=Homo sapiens (Human) OX=9606 GN=TUBB4B PE=1 SV=1	TUBB4B	0.760507	0.00329333	Yes	0.0135782	Yes	-2.69496
P26640	>sp|P26640|SYVC_HUMAN Valine--tRNA ligase OS=Homo sapiens (Human) OX=9606 GN=VARS PE=1 SV=4	VARS	0.674242	0.00327417	Yes	0.0135782	Yes	-2.69734
A0A0A0MRE5;Q9ULH1;Q9ULH1-2	>tr|A0A0A0MRE5|A0A0A0MRE5_HUMAN Isoform of Q9ULH1, Arf-GAP with SH3 domain, ANK repeat and PH domain-containing protein 1 OS=Homo sapiens (Human) OX=9606 GN=ASAP1 PE=1 SV=1;>sp|Q9ULH1|ASAP1_HUMAN Arf-GAP with SH3 domain, ANK repeat and PH domain-containing protein 1 OS=Homo sapiens (Human) OX=9606 GN=ASAP1 PE=1 SV=4;>sp|Q9ULH1-2|ASAP1-2_HUMAN Isoform of Q9ULH1, Isoform 1 of Arf-GAP with SH3 domai…	ASAP1	0.625381	0.00338917	Yes	0.013925	Yes	-2.68529
E5KLJ5;E5KLJ6;O60313;O60313-2	>tr|E5KLJ5|E5KLJ5_HUMAN Dynamin-like 120 kDa protein, mitochondrial OS=Homo sapiens GN=OPA1 PE=4 SV=1;>tr|E5KLJ6|E5KLJ6_HUMAN Dynamin-like 120 kDa protein, mitochondrial OS=Homo sapiens GN=OPA1 PE=4 SV=1;>sp|O60313|OPA1_HUMAN Dynamin-like 120 kDa protein, mitochondrial OS=Homo sapiens (Human) OX=9606 GN=OPA1 PE=1 SV=3;>sp|O60313-2|OPA1-2_HUMAN Isoform of O60313, Isoform 2 of Dynamin-like 120 kDa …	OPA1	0.782937	0.00340125	Yes	0.0139265	Yes	-2.68399
P00403	>sp|P00403|COX2_HUMAN Cytochrome c oxidase subunit 2 OS=Homo sapiens (Human) OX=9606 GN=MT-CO2 PE=1 SV=1	MT-CO2	0.764119	0.00342625	Yes	0.0139806	Yes	-2.68125
Q14019	>sp|Q14019|COTL1_HUMAN Coactosin-like protein OS=Homo sapiens (Human) OX=9606 GN=COTL1 PE=1 SV=3	COTL1	2.03799	0.00353083	Yes	0.0142603	Yes	2.67122
P23677	>sp|P23677|IP3KA_HUMAN Inositol-trisphosphate 3-kinase A OS=Homo sapiens (Human) OX=9606 GN=ITPKA PE=1 SV=1	ITPKA	0.567489	0.00351542	Yes	0.0142603	Yes	-2.67309
O95197;O95197-2;O95197-7	>sp|O95197|RTN3_HUMAN Reticulon-3 OS=Homo sapiens (Human) OX=9606 GN=RTN3 PE=1 SV=2;>sp|O95197-2|RTN3-2_HUMAN Isoform of O95197, Isoform 2 of Reticulon-3 OS=Homo sapiens (Human) OX=9606 GN=RTN3 PE=1 SV=2;>sp|O95197-7|RTN3-7_HUMAN Isoform of O95197, Isoform 7 of Reticulon-3 OS=Homo sapiens (Human) OX=9606 GN=RTN3 PE=1 SV=2	RTN3	0.641201	0.00352292	Yes	0.0142603	Yes	-2.67221
K7EK59;O75381;O75381-2	>tr|K7EK59|K7EK59_HUMAN Isoform of O75381, Pex14_N domain-containing protein (Fragment) OS=Homo sapiens (Human) OX=9606 GN=PEX14 PE=1 SV=1;>sp|O75381|PEX14_HUMAN Peroxisomal membrane protein PEX14 OS=Homo sapiens (Human) OX=9606 GN=PEX14 PE=1 SV=1;>sp|O75381-2|PEX14-2_HUMAN Isoform of O75381, Isoform 2 of Peroxisomal membrane protein PEX14 OS=Homo sapiens (Human) OX=9606 GN=PEX14 PE=1 SV=1	PEX14	0.665366	0.00354458	Yes	0.0142674	Yes	-2.66952
C9J2C4;O75190;O75190-2;O75190-3	>tr|C9J2C4|C9J2C4_HUMAN Isoform of O75190, J domain-containing protein (Fragment) OS=Homo sapiens (Human) OX=9606 GN=DNAJB6 PE=1 SV=1;>sp|O75190|DNJB6_HUMAN DnaJ homolog subfamily B member 6 OS=Homo sapiens (Human) OX=9606 GN=DNAJB6 PE=1 SV=2;>sp|O75190-2|DNJB6-2_HUMAN Isoform of O75190, Isoform B of DnaJ homolog subfamily B member 6 OS=Homo sapiens (Human) OX=9606 GN=DNAJB6 PE=1 SV=2;>sp|O75190-…	DNAJB6	0.678495	0.00360083	Yes	0.0144448	Yes	-2.66457
E7EMM4;Q13510;Q13510-2	>tr|E7EMM4|E7EMM4_HUMAN Isoform of Q13510, Acid ceramidase OS=Homo sapiens (Human) OX=9606 GN=ASAH1 PE=1 SV=1;>sp|Q13510|ASAH1_HUMAN Acid ceramidase OS=Homo sapiens (Human) OX=9606 GN=ASAH1 PE=1 SV=5;>sp|Q13510-2|ASAH1-2_HUMAN Isoform of Q13510, Isoform 2 of Acid ceramidase OS=Homo sapiens (Human) OX=9606 GN=ASAH1 PE=1 SV=5	ASAH1	1.49684	0.00363958	Yes	0.0145511	Yes	2.6603
Q9H2M9	>sp|Q9H2M9|RBGPR_HUMAN Rab3 GTPase-activating protein non-catalytic subunit OS=Homo sapiens (Human) OX=9606 GN=RAB3GAP2 PE=1 SV=1	RAB3GAP2	0.761805	0.00373542	Yes	0.0148841	Yes	-2.65074
Q6ZVM7	>sp|Q6ZVM7|TM1L2_HUMAN TOM1-like protein 2 OS=Homo sapiens (Human) OX=9606 GN=TOM1L2 PE=1 SV=1	TOM1L2	0.674153	0.00390833	Yes	0.015521	Yes	-2.63574
P47736-2;X6R8W7	>sp|P47736-2|RPGP1-2_HUMAN Isoform of P47736, Isoform 2 of Rap1 GTPase-activating protein 1 OS=Homo sapiens (Human) OX=9606 GN=RAP1GAP PE=1 SV=2;>tr|X6R8W7|X6R8W7_HUMAN Isoform of P47736, Rap-GAP domain-containing protein OS=Homo sapiens (Human) OX=9606 GN=RAP1GAP PE=1 SV=1	RAP1GAP	0.706773	0.00394792	Yes	0.015626	Yes	-2.63262
P82909	>sp|P82909|RT36_HUMAN 28S ribosomal protein S36, mitochondrial OS=Homo sapiens (Human) OX=9606 GN=MRPS36 PE=1 SV=2	MRPS36	0.317044	0.00401667	Yes	0.0157407	Yes	-2.62626
Q96FC7	>sp|Q96FC7|PHIPL_HUMAN Phytanoyl-CoA hydroxylase-interacting protein-like OS=Homo sapiens (Human) OX=9606 GN=PHYHIPL PE=1 SV=3	PHYHIPL	1.69447	0.00400833	Yes	0.0157407	Yes	2.6275
Q86TV6;Q86TV6-2	>sp|Q86TV6|TTC7B_HUMAN Tetratricopeptide repeat protein 7B OS=Homo sapiens (Human) OX=9606 GN=TTC7B PE=1 SV=3;>sp|Q86TV6-2|TTC7B-2_HUMAN Isoform of Q86TV6, Isoform 2 of Tetratricopeptide repeat protein 7B OS=Homo sapiens (Human) OX=9606 GN=TTC7B PE=1 SV=3	TTC7B	0.761405	0.00400125	Yes	0.0157407	Yes	-2.62804
E9PN51;E9PPW7;F8W9K7;O00217	>tr|E9PN51|E9PN51_HUMAN Isoform of O00217, NADH dehydrogenase [ubiquinone] iron-sulfur protein 8, mitochondrial (Fragment) OS=Homo sapiens (Human) OX=9606 GN=NDUFS8 PE=1 SV=1;>tr|E9PPW7|E9PPW7_HUMAN Isoform of O00217, NADH dehydrogenase [ubiquinone] iron-sulfur protein 8, mitochondrial (Fragment) OS=Homo sapiens (Human) OX=9606 GN=NDUFS8 PE=1 SV=1;>tr|F8W9K7|F8W9K7_HUMAN Isoform of O00217, 4Fe-4S…	NDUFS8	0.740138	0.00403667	Yes	0.015767	Yes	-2.62455
Q12959-8;Q12959-9	>sp|Q12959-8|DLG1-8_HUMAN Isoform of Q12959, Isoform 8 of Disks large homolog 1 OS=Homo sapiens (Human) OX=9606 GN=DLG1 PE=1 SV=2;>sp|Q12959-9|DLG1-9_HUMAN Isoform of Q12959, Isoform 9 of Disks large homolog 1 OS=Homo sapiens (Human) OX=9606 GN=DLG1 PE=1 SV=2	DLG1	0.776223	0.00414333	Yes	0.0160255	Yes	-2.61581
P35052	>sp|P35052|GPC1_HUMAN Glypican-1 OS=Homo sapiens (Human) OX=9606 GN=GPC1 PE=1 SV=2	GPC1	0.72039	0.00414333	Yes	0.0160255	Yes	-2.61575
Q92783;Q92783-2	>sp|Q92783|STAM1_HUMAN Signal transducing adapter molecule 1 OS=Homo sapiens (Human) OX=9606 GN=STAM PE=1 SV=3;>sp|Q92783-2|STAM1-2_HUMAN Isoform of Q92783, Isoform 2 of Signal transducing adapter molecule 1 OS=Homo sapiens (Human) OX=9606 GN=STAM PE=1 SV=3	STAM	0.610153	0.00413375	Yes	0.0160255	Yes	-2.61637
Q9ULD0	>sp|Q9ULD0|OGDHL_HUMAN 2-oxoglutarate dehydrogenase-like, mitochondrial OS=Homo sapiens (Human) OX=9606 GN=OGDHL PE=1 SV=3	OGDHL	0.682239	0.00417542	Yes	0.0160972	Yes	-2.6129
O75534;O75534-2;O75534-3;O75534-4	>sp|O75534|CSDE1_HUMAN Cold shock domain-containing protein E1 OS=Homo sapiens (Human) OX=9606 GN=CSDE1 PE=1 SV=2;>sp|O75534-2|CSDE1-2_HUMAN Isoform of O75534, Isoform 2 of Cold shock domain-containing protein E1 OS=Homo sapiens (Human) OX=9606 GN=CSDE1 PE=1 SV=2;>sp|O75534-3|CSDE1-3_HUMAN Isoform of O75534, Isoform 3 of Cold shock domain-containing protein E1 OS=Homo sapiens (Human) OX=9606 GN=C…	CSDE1	0.746449	0.00426333	Yes	0.0163444	Yes	-2.60569
Q8N9I0	>sp|Q8N9I0|SYT2_HUMAN Synaptotagmin-2 OS=Homo sapiens (Human) OX=9606 GN=SYT2 PE=1 SV=2	SYT2	0.41341	0.00426708	Yes	0.0163444	Yes	-2.60521
P28289;P28289-2	>sp|P28289|TMOD1_HUMAN Tropomodulin-1 OS=Homo sapiens (Human) OX=9606 GN=TMOD1 PE=1 SV=1;>sp|P28289-2|TMOD1-2_HUMAN Isoform of P28289, Isoform 2 of Tropomodulin-1 OS=Homo sapiens (Human) OX=9606 GN=TMOD1 PE=1 SV=1	TMOD1	0.632709	0.00434333	Yes	0.016583	Yes	-2.5995
O95741;O95741-2	>sp|O95741|CPNE6_HUMAN Copine-6 OS=Homo sapiens (Human) OX=9606 GN=CPNE6 PE=1 SV=3;>sp|O95741-2|CPNE6-2_HUMAN Isoform of O95741, Isoform 2 of Copine-6 OS=Homo sapiens (Human) OX=9606 GN=CPNE6 PE=1 SV=3	CPNE6	1.43492	0.00446	Yes	0.0169739	Yes	2.59014
P35222	>sp|P35222|CTNB1_HUMAN Catenin beta-1 OS=Homo sapiens (Human) OX=9606 GN=CTNNB1 PE=1 SV=1	CTNNB1	1.49076	0.0044775	Yes	0.016986	Yes	2.58896
P41222	>sp|P41222|PTGDS_HUMAN Prostaglandin-H2 D-isomerase OS=Homo sapiens (Human) OX=9606 GN=PTGDS PE=1 SV=1	PTGDS	2.0542	0.00452375	Yes	0.0170525	Yes	2.58573
Q12765;Q12765-2	>sp|Q12765|SCRN1_HUMAN Secernin-1 OS=Homo sapiens (Human) OX=9606 GN=SCRN1 PE=1 SV=2;>sp|Q12765-2|SCRN1-2_HUMAN Isoform of Q12765, Isoform 2 of Secernin-1 OS=Homo sapiens (Human) OX=9606 GN=SCRN1 PE=1 SV=2	SCRN1	1.31076	0.0045175	Yes	0.0170525	Yes	2.58635
Q8N5V2;Q8N5V2-3	>sp|Q8N5V2|NGEF_HUMAN Ephexin-1 OS=Homo sapiens (Human) OX=9606 GN=NGEF PE=1 SV=2;>sp|Q8N5V2-3|NGEF-3_HUMAN Isoform of Q8N5V2, Isoform 3 of Ephexin-1 OS=Homo sapiens (Human) OX=9606 GN=NGEF PE=1 SV=2	NGEF	0.609287	0.00454167	Yes	0.0170659	Yes	-2.58406
F8VQX6;H0YI09;Q9H8H3	>tr|F8VQX6|F8VQX6_HUMAN Isoform of Q9H8H3, Methyltransf_11 domain-containing protein (Fragment) OS=Homo sapiens (Human) OX=9606 GN=METTL7A PE=1 SV=1;>tr|H0YI09|H0YI09_HUMAN Isoform of Q9H8H3, Methyltransf_11 domain-containing protein (Fragment) OS=Homo sapiens (Human) OX=9606 GN=METTL7A PE=1 SV=1;>sp|Q9H8H3|MET7A_HUMAN Methyltransferase-like protein 7A OS=Homo sapiens (Human) OX=9606 GN=METTL7A P…	METTL7A	2.27539	0.00459417	Yes	0.0171546	Yes	2.57998
Q9Y2J0	>sp|Q9Y2J0|RP3A_HUMAN Rabphilin-3A OS=Homo sapiens (Human) OX=9606 GN=RPH3A PE=1 SV=1	RPH3A	0.649526	0.00459417	Yes	0.0171546	Yes	-2.58004
H3BPF6;Q99471	>tr|H3BPF6|H3BPF6_HUMAN Isoform of Q99471, Prefoldin subunit 5 (Fragment) OS=Homo sapiens (Human) OX=9606 GN=PFDN5 PE=1 SV=1;>sp|Q99471|PFD5_HUMAN Prefoldin subunit 5 OS=Homo sapiens (Human) OX=9606 GN=PFDN5 PE=1 SV=2	PFDN5	0.604431	0.00471542	Yes	0.0175521	Yes	-2.57126
Q99426	>sp|Q99426|TBCB_HUMAN Tubulin-folding cofactor B OS=Homo sapiens (Human) OX=9606 GN=TBCB PE=1 SV=2	TBCB	1.64011	0.00474583	Yes	0.0176101	Yes	2.56886
O95757	>sp|O95757|HS74L_HUMAN Heat shock 70 kDa protein 4L OS=Homo sapiens (Human) OX=9606 GN=HSPA4L PE=1 SV=3	HSPA4L	0.719995	0.00478542	Yes	0.0177017	Yes	-2.56645
Q8WXD9	>sp|Q8WXD9|CSKI1_HUMAN Caskin-1 OS=Homo sapiens (Human) OX=9606 GN=CASKIN1 PE=1 SV=1	CASKIN1	0.670913	0.00490083	Yes	0.0178855	Yes	-2.55798
E5RHW4;O94905	>tr|E5RHW4|E5RHW4_HUMAN Isoform of O94905, PHB domain-containing protein (Fragment) OS=Homo sapiens (Human) OX=9606 GN=ERLIN2 PE=1 SV=1;>sp|O94905|ERLN2_HUMAN Erlin-2 OS=Homo sapiens (Human) OX=9606 GN=ERLIN2 PE=1 SV=1	ERLIN2	1.55416	0.00490792	Yes	0.0178855	Yes	2.5573
Q86VS8	>sp|Q86VS8|HOOK3_HUMAN Protein Hook homolog 3 OS=Homo sapiens (Human) OX=9606 GN=HOOK3 PE=1 SV=2	HOOK3	0.415579	0.00491042	Yes	0.0178855	Yes	-2.5572
A0A087X011;E9PES4;J3KPF9;Q9Y496	>tr|A0A087X011|A0A087X011_HUMAN Isoform of Q9Y496, Kinesin-like protein OS=Homo sapiens (Human) OX=9606 GN=KIF3A PE=1 SV=1;>tr|E9PES4|E9PES4_HUMAN Isoform of Q9Y496, Kinesin-like protein OS=Homo sapiens (Human) OX=9606 GN=KIF3A PE=1 SV=1;>tr|J3KPF9|J3KPF9_HUMAN Isoform of Q9Y496, Kinesin-like protein OS=Homo sapiens (Human) OX=9606 GN=KIF3A PE=1 SV=1;>sp|Q9Y496|KIF3A_HUMAN Kinesin-like protein KI…	KIF3A	0.57787	0.00490333	Yes	0.0178855	Yes	-2.55771
A0A087X0K9;G3V1L9;G5E9E7;Q07157;Q07157-2	>tr|A0A087X0K9|A0A087X0K9_HUMAN Isoform of Q07157, Tight junction protein ZO-1 OS=Homo sapiens (Human) OX=9606 GN=TJP1 PE=1 SV=1;>tr|G3V1L9|G3V1L9_HUMAN Isoform of Q07157, Tight junction protein 1 (Zona occludens 1), isoform CRA_a OS=Homo sapiens (Human) OX=9606 GN=TJP1 PE=1 SV=1;>tr|G5E9E7|G5E9E7_HUMAN Isoform of Q07157, Tight junction protein 1 (Zona occludens 1), isoform CRA_e OS=Homo sapiens …	TJP1	1.66386	0.00486917	Yes	0.0178855	Yes	2.56025
Q8N2K0;Q8N2K0-2;Q8N2K0-3	>sp|Q8N2K0|ABD12_HUMAN Lysophosphatidylserine lipase ABHD12 OS=Homo sapiens (Human) OX=9606 GN=ABHD12 PE=1 SV=2;>sp|Q8N2K0-2|ABD12-2_HUMAN Isoform of Q8N2K0, Isoform 2 of Lysophosphatidylserine lipase ABHD12 OS=Homo sapiens (Human) OX=9606 GN=ABHD12 PE=1 SV=2;>sp|Q8N2K0-3|ABD12-3_HUMAN Isoform of Q8N2K0, Isoform 3 of Lysophosphatidylserine lipase ABHD12 OS=Homo sapiens (Human) OX=9606 GN=ABHD12 P…	ABHD12	0.592495	0.00498375	Yes	0.0179871	Yes	-2.55226
O94985;O94985-2	>sp|O94985|CSTN1_HUMAN Calsyntenin-1 OS=Homo sapiens (Human) OX=9606 GN=CLSTN1 PE=1 SV=1;>sp|O94985-2|CSTN1-2_HUMAN Isoform of O94985, Isoform 2 of Calsyntenin-1 OS=Homo sapiens (Human) OX=9606 GN=CLSTN1 PE=1 SV=1	CLSTN1	0.768731	0.00495458	Yes	0.0179871	Yes	-2.55418
P52209;P52209-2	>sp|P52209|6PGD_HUMAN 6-phosphogluconate dehydrogenase, decarboxylating OS=Homo sapiens (Human) OX=9606 GN=PGD PE=1 SV=3;>sp|P52209-2|6PGD-2_HUMAN Isoform of P52209, Isoform 2 of 6-phosphogluconate dehydrogenase, decarboxylating OS=Homo sapiens (Human) OX=9606 GN=PGD PE=1 SV=3	PGD	1.43745	0.00498375	Yes	0.0179871	Yes	2.55227
F8W1A4;P54819;P54819-2;P54819-3;P54819-5	>tr|F8W1A4|F8W1A4_HUMAN Isoform of P54819, Adenylate kinase 2, mitochondrial OS=Homo sapiens (Human) OX=9606 GN=AK2 PE=1 SV=1;>sp|P54819|KAD2_HUMAN Adenylate kinase 2, mitochondrial OS=Homo sapiens (Human) OX=9606 GN=AK2 PE=1 SV=2;>sp|P54819-2|KAD2-2_HUMAN Isoform of P54819, Isoform 2 of Adenylate kinase 2, mitochondrial OS=Homo sapiens (Human) OX=9606 GN=AK2 PE=1 SV=2;>sp|P54819-3|KAD2-3_HUMAN I…	AK2	2.78677	0.00500417	Yes	0.018006	Yes	2.55093
Q9GZT4	>sp|Q9GZT4|SRR_HUMAN Serine racemase OS=Homo sapiens (Human) OX=9606 GN=SRR PE=1 SV=1	SRR	2.09353	0.00504708	Yes	0.0181056	Yes	2.54735
Q9Y2J8	>sp|Q9Y2J8|PADI2_HUMAN Protein-arginine deiminase type-2 OS=Homo sapiens (Human) OX=9606 GN=PADI2 PE=1 SV=2	PADI2	1.88196	0.00509292	Yes	0.018215	Yes	2.54381
M0R366;Q9BTV5	>tr|M0R366|M0R366_HUMAN Isoform of Q9BTV5, Fibronectin type III and SPRY domain-containing protein 1 OS=Homo sapiens (Human) OX=9606 GN=FSD1 PE=1 SV=1;>sp|Q9BTV5|FSD1_HUMAN Fibronectin type III and SPRY domain-containing protein 1 OS=Homo sapiens (Human) OX=9606 GN=FSD1 PE=1 SV=1	FSD1	0.674519	0.00521542	Yes	0.018431	Yes	-2.53576
P16403	>sp|P16403|H12_HUMAN Histone H1.2 OS=Homo sapiens (Human) OX=9606 GN=H1-2 PE=1 SV=2	H1-2	1.6686	0.00520667	Yes	0.018431	Yes	2.53637
Q92522	>sp|Q92522|H1X_HUMAN Histone H1x OS=Homo sapiens (Human) OX=9606 GN=H1FX PE=1 SV=1	H1FX	1.80966	0.00518792	Yes	0.018431	Yes	2.53752
Q92890;Q92890-1	>sp|Q92890|UFD1_HUMAN Ubiquitin recognition factor in ER-associated degradation protein 1 OS=Homo sapiens (Human) OX=9606 GN=UFD1 PE=1 SV=3;>sp|Q92890-1|UFD1-1_HUMAN Isoform of Q92890, Isoform Long of Ubiquitin recognition factor in ER-associated degradation protein 1 OS=Homo sapiens (Human) OX=9606 GN=UFD1 PE=1 SV=3	UFD1	0.602836	0.00518667	Yes	0.018431	Yes	-2.53756
F8W7Q4;Q96A26	>tr|F8W7Q4|F8W7Q4_HUMAN Isoform of Q96A26, Protein FAM162A OS=Homo sapiens (Human) OX=9606 GN=FAM162A PE=1 SV=1;>sp|Q96A26|F162A_HUMAN Protein FAM162A OS=Homo sapiens (Human) OX=9606 GN=FAM162A PE=1 SV=2	FAM162A	0.706932	0.0052825	Yes	0.0186127	Yes	-2.53097
P13073	>sp|P13073|COX41_HUMAN Cytochrome c oxidase subunit 4 isoform 1, mitochondrial OS=Homo sapiens (Human) OX=9606 GN=COX4I1 PE=1 SV=1	COX4I1	0.774804	0.00531292	Yes	0.0186645	Yes	-2.5292
K7EPS8;Q9NSK7;Q9NSK7-2;Q9NSK7-3;Q9NSK7-4	>tr|K7EPS8|K7EPS8_HUMAN Isoform of Q9NSK7, Protein C19orf12 (Fragment) OS=Homo sapiens (Human) OX=9606 GN=C19orf12 PE=1 SV=1;>sp|Q9NSK7|CS012_HUMAN Protein C19orf12 OS=Homo sapiens (Human) OX=9606 GN=C19orf12 PE=1 SV=3;>sp|Q9NSK7-2|CS012-2_HUMAN Isoform of Q9NSK7, Isoform 2 of Protein C19orf12 OS=Homo sapiens (Human) OX=9606 GN=C19orf12 PE=1 SV=3;>sp|Q9NSK7-3|CS012-3_HUMAN Isoform of Q9NSK7, Isof…	C19ORF12	0.700677	0.00537708	Yes	0.0188342	Yes	-2.52471
P02042	>sp|P02042|HBD_HUMAN Hemoglobin subunit delta OS=Homo sapiens (Human) OX=9606 GN=HBD PE=1 SV=2	HBD	1.55949	0.00541208	Yes	0.0188804	Yes	2.52228
P20916;P20916-3	>sp|P20916|MAG_HUMAN Myelin-associated glycoprotein OS=Homo sapiens (Human) OX=9606 GN=MAG PE=1 SV=1;>sp|P20916-3|MAG-3_HUMAN Isoform of P20916, Isoform 3 of Myelin-associated glycoprotein OS=Homo sapiens (Human) OX=9606 GN=MAG PE=1 SV=1	MAG	0.352339	0.00542208	Yes	0.0188804	Yes	-2.52173
P35609	>sp|P35609|ACTN2_HUMAN Alpha-actinin-2 OS=Homo sapiens (Human) OX=9606 GN=ACTN2 PE=1 SV=1	ACTN2	0.674577	0.00547042	Yes	0.0189377	Yes	-2.51804
P02649	>sp|P02649|APOE_HUMAN Apolipoprotein E OS=Homo sapiens (Human) OX=9606 GN=APOE PE=1 SV=1	APOE	0.681087	0.00546917	Yes	0.0189377	Yes	-2.51811
D6R938;E9PBG7;E9PF82;Q13557;Q13557-10;Q13557-11;Q1	NA	CAMK2D	0.770945	0.00557083	Yes	0.0192292	Yes	-2.51209
F5H459	>tr|F5H459|F5H459_HUMAN Isoform of Q92572, AP complex subunit sigma OS=Homo sapiens (Human) OX=9606 GN=AP3S1 PE=1 SV=1	AP3S1	0.741358	0.00571958	Yes	0.0196855	Yes	-2.50404
P61224;P61224-3	>sp|P61224|RAP1B_HUMAN Ras-related protein Rap-1b OS=Homo sapiens (Human) OX=9606 GN=RAP1B PE=1 SV=1;>sp|P61224-3|RAP1B-3_HUMAN Isoform of P61224, Isoform 3 of Ras-related protein Rap-1b OS=Homo sapiens (Human) OX=9606 GN=RAP1B PE=1 SV=1	RAP1B	1.36498	0.00575042	Yes	0.0197344	Yes	2.50189
Q9NZB2;Q9NZB2-4;Q9NZB2-6	>sp|Q9NZB2|F120A_HUMAN Constitutive coactivator of PPAR-gamma-like protein 1 OS=Homo sapiens (Human) OX=9606 GN=FAM120A PE=1 SV=2;>sp|Q9NZB2-4|F120A-4_HUMAN Isoform of Q9NZB2, Isoform D of Constitutive coactivator of PPAR-gamma-like protein 1 OS=Homo sapiens (Human) OX=9606 GN=FAM120A PE=1 SV=2;>sp|Q9NZB2-6|F120A-6_HUMAN Isoform of Q9NZB2, Isoform F of Constitutive coactivator of PPAR-gamma-like …	FAM120A	0.532098	0.00584	Yes	0.0199551	Yes	-2.49684
C9J0K6;P30626;P30626-2;P30626-3	>tr|C9J0K6|C9J0K6_HUMAN Isoform of P30626, Sorcin OS=Homo sapiens (Human) OX=9606 GN=SRI PE=1 SV=1;>sp|P30626|SORCN_HUMAN Sorcin OS=Homo sapiens (Human) OX=9606 GN=SRI PE=1 SV=1;>sp|P30626-2|SORCN-2_HUMAN Isoform of P30626, Isoform 2 of Sorcin OS=Homo sapiens (Human) OX=9606 GN=SRI PE=1 SV=1;>sp|P30626-3|SORCN-3_HUMAN Isoform of P30626, Isoform 3 of Sorcin OS=Homo sapiens (Human) OX=9606 GN=SRI P…	SRI	2.28406	0.00584833	Yes	0.0199551	Yes	2.49624
P60880	>sp|P60880|SNP25_HUMAN Synaptosomal-associated protein 25 OS=Homo sapiens (Human) OX=9606 GN=SNAP25 PE=1 SV=1	SNAP25	0.724441	0.00596542	Yes	0.0202962	Yes	-2.48853
P07196	>sp|P07196|NFL_HUMAN Neurofilament light polypeptide OS=Homo sapiens (Human) OX=9606 GN=NEFL PE=1 SV=3	NEFL	0.552819	0.00599417	Yes	0.0203358	Yes	-2.48691
Q9UDY4	>sp|Q9UDY4|DNJB4_HUMAN DnaJ homolog subfamily B member 4 OS=Homo sapiens (Human) OX=9606 GN=DNAJB4 PE=1 SV=1	DNAJB4	0.533156	0.00601583	Yes	0.0203511	Yes	-2.48539
P02689	>sp|P02689|MYP2_HUMAN Myelin P2 protein OS=Homo sapiens (Human) OX=9606 GN=PMP2 PE=1 SV=3	PMP2	0.491668	0.00611042	Yes	0.0206124	Yes	-2.47955
Q96GW7	>sp|Q96GW7|PGCB_HUMAN Brevican core protein OS=Homo sapiens (Human) OX=9606 GN=BCAN PE=1 SV=2	BCAN	1.42153	0.00621958	Yes	0.0208845	Yes	2.4729
Q9BW30	>sp|Q9BW30|TPPP3_HUMAN Tubulin polymerization-promoting protein family member 3 OS=Homo sapiens (Human) OX=9606 GN=TPPP3 PE=1 SV=1	TPPP3	2.31022	0.00622625	Yes	0.0208845	Yes	2.4725
O00499;O00499-3;O00499-5	>sp|O00499|BIN1_HUMAN Myc box-dependent-interacting protein 1 OS=Homo sapiens (Human) OX=9606 GN=BIN1 PE=1 SV=1;>sp|O00499-3|BIN1-3_HUMAN Isoform of O00499, Isoform IIC1 of Myc box-dependent-interacting protein 1 OS=Homo sapiens (Human) OX=9606 GN=BIN1 PE=1 SV=1;>sp|O00499-5|BIN1-5_HUMAN Isoform of O00499, Isoform IID of Myc box-dependent-interacting protein 1 OS=Homo sapiens (Human) OX=9606 GN=B…	BIN1	0.699065	0.00626333	Yes	0.0209497	Yes	-2.47049
P00966	>sp|P00966|ASSY_HUMAN Argininosuccinate synthase OS=Homo sapiens (Human) OX=9606 GN=ASS1 PE=1 SV=2	ASS1	2.10754	0.0063025	Yes	0.0210215	Yes	2.46841
Q9UI09	>sp|Q9UI09|NDUAC_HUMAN NADH dehydrogenase [ubiquinone] 1 alpha subcomplex subunit 12 OS=Homo sapiens (Human) OX=9606 GN=NDUFA12 PE=1 SV=1	NDUFA12	0.691214	0.00638292	Yes	0.0212301	Yes	-2.46375
Q86UN3	>sp|Q86UN3|R4RL2_HUMAN Reticulon-4 receptor-like 2 OS=Homo sapiens (Human) OX=9606 GN=RTN4RL2 PE=1 SV=1	RTN4RL2	0.631747	0.00646125	Yes	0.0214306	Yes	-2.45875
F5H126;F5H6C1;O43581-2	>tr|F5H126|F5H126_HUMAN Synaptotagmin-7 OS=Homo sapiens GN=SYT7 PE=4 SV=1;>tr|F5H6C1|F5H6C1_HUMAN Synaptotagmin-7 OS=Homo sapiens GN=SYT7 PE=4 SV=1;>sp|O43581-2|SYT7-2_HUMAN Isoform of O43581, Isoform 2 of Synaptotagmin-7 OS=Homo sapiens (Human) OX=9606 GN=SYT7 PE=1 SV=3	SYT7	0.709245	0.00648583	Yes	0.0214522	Yes	-2.45744
Q6F5E8;Q6F5E8-2	>sp|Q6F5E8|CARL2_HUMAN Capping protein, Arp2/3 and myosin-I linker protein 2 OS=Homo sapiens (Human) OX=9606 GN=CARMIL2 PE=1 SV=2;>sp|Q6F5E8-2|CARL2-2_HUMAN Isoform of Q6F5E8, Isoform 2 of Capping protein, Arp2/3 and myosin-I linker protein 2 OS=Homo sapiens (Human) OX=9606 GN=CARMIL2 PE=1 SV=2	CARMIL2	0.4968	0.00655292	Yes	0.0215423	Yes	-2.45367
P06756;P06756-2;P06756-3	>sp|P06756|ITAV_HUMAN Integrin alpha-V OS=Homo sapiens (Human) OX=9606 GN=ITGAV PE=1 SV=2;>sp|P06756-2|ITAV-2_HUMAN Isoform of P06756, Isoform 2 of Integrin alpha-V OS=Homo sapiens (Human) OX=9606 GN=ITGAV PE=1 SV=2;>sp|P06756-3|ITAV-3_HUMAN Isoform of P06756, Isoform 3 of Integrin alpha-V OS=Homo sapiens (Human) OX=9606 GN=ITGAV PE=1 SV=2	ITGAV	1.43301	0.0065675	Yes	0.0215423	Yes	2.4529
Q9BQI5;Q9BQI5-2	>sp|Q9BQI5|SGIP1_HUMAN SH3-containing GRB2-like protein 3-interacting protein 1 OS=Homo sapiens (Human) OX=9606 GN=SGIP1 PE=1 SV=2;>sp|Q9BQI5-2|SGIP1-2_HUMAN Isoform of Q9BQI5, Isoform 2 of SH3-containing GRB2-like protein 3-interacting protein 1 OS=Homo sapiens (Human) OX=9606 GN=SGIP1 PE=1 SV=2	SGIP1	0.670075	0.00654542	Yes	0.0215423	Yes	-2.454
Q86UU1;Q86UU1-2;Q86UU1-3	>sp|Q86UU1|PHLB1_HUMAN Pleckstrin homology-like domain family B member 1 OS=Homo sapiens (Human) OX=9606 GN=PHLDB1 PE=1 SV=1;>sp|Q86UU1-2|PHLB1-2_HUMAN Isoform of Q86UU1, Isoform 2 of Pleckstrin homology-like domain family B member 1 OS=Homo sapiens (Human) OX=9606 GN=PHLDB1 PE=1 SV=1;>sp|Q86UU1-3|PHLB1-3_HUMAN Isoform of Q86UU1, Isoform 3 of Pleckstrin homology-like domain family B member 1 OS=H…	PHLDB1	1.40505	0.00666375	Yes	0.0217978	Yes	2.4474
Q9BW62	>sp|Q9BW62|KATL1_HUMAN Katanin p60 ATPase-containing subunit A-like 1 OS=Homo sapiens (Human) OX=9606 GN=KATNAL1 PE=1 SV=1	KATNAL1	0.396666	0.00673458	Yes	0.0219467	Yes	-2.44379
Q9NRD5	>sp|Q9NRD5|PICK1_HUMAN PRKCA-binding protein OS=Homo sapiens (Human) OX=9606 GN=PICK1 PE=1 SV=2	PICK1	0.651153	0.00674625	Yes	0.0219467	Yes	-2.44328
Q5SSJ5;X6RGJ2	>sp|Q5SSJ5|HP1B3_HUMAN Heterochromatin protein 1-binding protein 3 OS=Homo sapiens (Human) OX=9606 GN=HP1BP3 PE=1 SV=1;>tr|X6RGJ2|X6RGJ2_HUMAN Isoform of Q5SSJ5, Heterochromatin protein 1-binding protein 3 (Fragment) OS=Homo sapiens (Human) OX=9606 GN=HP1BP3 PE=1 SV=1	HP1BP3	1.62702	0.00677583	Yes	0.0219827	Yes	2.44174
G3V0I5;P49821;P49821-2	>tr|G3V0I5|G3V0I5_HUMAN Isoform of P49821, NADH dehydrogenase [ubiquinone] flavoprotein 1, mitochondrial OS=Homo sapiens (Human) OX=9606 GN=NDUFV1 PE=1 SV=1;>sp|P49821|NDUV1_HUMAN NADH dehydrogenase [ubiquinone] flavoprotein 1, mitochondrial OS=Homo sapiens (Human) OX=9606 GN=NDUFV1 PE=1 SV=4;>sp|P49821-2|NDUV1-2_HUMAN Isoform of P49821, Isoform 2 of NADH dehydrogenase [ubiquinone] flavoprotein 1…	NDUFV1	0.70014	0.0068	Yes	0.022001	Yes	-2.44064
P49773	>sp|P49773|HINT1_HUMAN Histidine triad nucleotide-binding protein 1 OS=Homo sapiens (Human) OX=9606 GN=HINT1 PE=1 SV=2	HINT1	1.75621	0.00689542	Yes	0.0222491	Yes	2.43578
P11586	>sp|P11586|C1TC_HUMAN C-1-tetrahydrofolate synthase, cytoplasmic OS=Homo sapiens (Human) OX=9606 GN=MTHFD1 PE=1 SV=3	MTHFD1	1.2997	0.00695667	Yes	0.0223254	Yes	2.43271
E9PLK3;P55786	>tr|E9PLK3|E9PLK3_HUMAN Isoform of P55786, Aminopeptidase OS=Homo sapiens (Human) OX=9606 GN=NPEPPS PE=1 SV=1;>sp|P55786|PSA_HUMAN Puromycin-sensitive aminopeptidase OS=Homo sapiens (Human) OX=9606 GN=NPEPPS PE=1 SV=2	NPEPPS	1.22806	0.00694167	Yes	0.0223254	Yes	2.43337
O75821	>sp|O75821|EIF3G_HUMAN Eukaryotic translation initiation factor 3 subunit G OS=Homo sapiens (Human) OX=9606 GN=EIF3G PE=1 SV=2	EIF3G	0.611524	0.0070625	Yes	0.022604	Yes	-2.4265
Q8IVF2;Q8IVF2-3	>sp|Q8IVF2|AHNK2_HUMAN Protein AHNAK2 OS=Homo sapiens (Human) OX=9606 GN=AHNAK2 PE=1 SV=2;>sp|Q8IVF2-3|AHNK2-3_HUMAN Isoform of Q8IVF2, Isoform 3 of Protein AHNAK2 OS=Homo sapiens (Human) OX=9606 GN=AHNAK2 PE=1 SV=2	AHNAK2	0.503205	0.00716875	Yes	0.0228824	Yes	-2.421
O00592;O00592-2	>sp|O00592|PODXL_HUMAN Podocalyxin OS=Homo sapiens (Human) OX=9606 GN=PODXL PE=1 SV=2;>sp|O00592-2|PODXL-2_HUMAN Isoform of O00592, Isoform 2 of Podocalyxin OS=Homo sapiens (Human) OX=9606 GN=PODXL PE=1 SV=2	PODXL	1.61086	0.00718958	Yes	0.0228873	Yes	2.41982
O14964;O14964-2	>sp|O14964|HGS_HUMAN Hepatocyte growth factor-regulated tyrosine kinase substrate OS=Homo sapiens (Human) OX=9606 GN=HGS PE=1 SV=1;>sp|O14964-2|HGS-2_HUMAN Isoform of O14964, Isoform 2 of Hepatocyte growth factor-regulated tyrosine kinase substrate OS=Homo sapiens (Human) OX=9606 GN=HGS PE=1 SV=1	HGS	0.808376	0.0072775	Yes	0.0231053	Yes	-2.41573
P30519	>sp|P30519|HMOX2_HUMAN Heme oxygenase 2 OS=Homo sapiens (Human) OX=9606 GN=HMOX2 PE=1 SV=2	HMOX2	0.673534	0.00734042	Yes	0.0232429	Yes	-2.41283
C9JYY6;Q92823;Q92823-2;Q92823-3;Q92823-5;Q92823-6	>tr|C9JYY6|C9JYY6_HUMAN Isoform of Q92823, Neuronal cell adhesion molecule OS=Homo sapiens (Human) OX=9606 GN=NRCAM PE=1 SV=3;>sp|Q92823|NRCAM_HUMAN Neuronal cell adhesion molecule OS=Homo sapiens (Human) OX=9606 GN=NRCAM PE=1 SV=3;>sp|Q92823-2|NRCAM-2_HUMAN Isoform of Q92823, Isoform 2 of Neuronal cell adhesion molecule OS=Homo sapiens (Human) OX=9606 GN=NRCAM PE=1 SV=3;>sp|Q92823-3|NRCAM-3_HUMA…	NRCAM	1.30311	0.00738667	Yes	0.0232994	Yes	2.41044
C9JIR6;O75688;O75688-2;O75688-4;O75688-5	>tr|C9JIR6|C9JIR6_HUMAN Isoform of O75688, PPM-type phosphatase domain-containing protein (Fragment) OS=Homo sapiens (Human) OX=9606 GN=PPM1B PE=1 SV=1;>sp|O75688|PPM1B_HUMAN Protein phosphatase 1B OS=Homo sapiens (Human) OX=9606 GN=PPM1B PE=1 SV=1;>sp|O75688-2|PPM1B-2_HUMAN Isoform of O75688, Isoform Beta-2 of Protein phosphatase 1B OS=Homo sapiens (Human) OX=9606 GN=PPM1B PE=1 SV=1;>sp|O75688-4…	PPM1B	1.86163	0.0073975	Yes	0.0232994	Yes	2.40989
P46439	>sp|P46439|GSTM5_HUMAN Glutathione S-transferase Mu 5 OS=Homo sapiens (Human) OX=9606 GN=GSTM5 PE=1 SV=3	GSTM5	3.97412	0.00742667	Yes	0.0233293	Yes	2.40853
P24534	>sp|P24534|EF1B_HUMAN Elongation factor 1-beta OS=Homo sapiens (Human) OX=9606 GN=EEF1B2 PE=1 SV=3	EEF1B2	0.713771	0.00747542	Yes	0.0234205	Yes	-2.40649
Q9C0C9	>sp|Q9C0C9|UBE2O_HUMAN (E3-independent) E2 ubiquitin-conjugating enzyme OS=Homo sapiens (Human) OX=9606 GN=UBE2O PE=1 SV=3	UBE2O	0.694244	0.00758083	Yes	0.0236883	Yes	-2.4019
O00429-6	>sp|O00429-6|DNM1L-6_HUMAN Isoform of O00429, Isoform 6 of Dynamin-1-like protein OS=Homo sapiens (Human) OX=9606 GN=DNM1L PE=1 SV=2	DNM1L	0.732379	0.00774708	Yes	0.0241442	Yes	-2.39424
H0YI37	>tr|H0YI37|H0YI37_HUMAN Isoform of P06576, ATP-synt_ab domain-containing protein (Fragment) OS=Homo sapiens (Human) OX=9606 GN=ATP5F1B PE=1 SV=1	ATP5F1B	0.709066	0.00777167	Yes	0.0241574	Yes	-2.39299
P14550	>sp|P14550|AK1A1_HUMAN Aldo-keto reductase family 1 member A1 OS=Homo sapiens (Human) OX=9606 GN=AKR1A1 PE=1 SV=3	AKR1A1	1.80929	0.00806042	Yes	0.0248598	Yes	2.37953
G3V2S6;Q9Y5K8	>tr|G3V2S6|G3V2S6_HUMAN Isoform of Q9Y5K8, V-type proton ATPase subunit D OS=Homo sapiens (Human) OX=9606 GN=ATP6V1D PE=1 SV=1;>sp|Q9Y5K8|VATD_HUMAN V-type proton ATPase subunit D OS=Homo sapiens (Human) OX=9606 GN=ATP6V1D PE=1 SV=1	ATP6V1D	0.776395	0.00803958	Yes	0.0248598	Yes	-2.38051
P07737	>sp|P07737|PROF1_HUMAN Profilin-1 OS=Homo sapiens (Human) OX=9606 GN=PFN1 PE=1 SV=2	PFN1	1.8261	0.0080575	Yes	0.0248598	Yes	2.37979
Q9NPH2;Q9NPH2-2;Q9NPH2-3	>sp|Q9NPH2|INO1_HUMAN Inositol-3-phosphate synthase 1 OS=Homo sapiens (Human) OX=9606 GN=ISYNA1 PE=1 SV=1;>sp|Q9NPH2-2|INO1-2_HUMAN Isoform of Q9NPH2, Isoform 2 of Inositol-3-phosphate synthase 1 OS=Homo sapiens (Human) OX=9606 GN=ISYNA1 PE=1 SV=1;>sp|Q9NPH2-3|INO1-3_HUMAN Isoform of Q9NPH2, Isoform 3 of Inositol-3-phosphate synthase 1 OS=Homo sapiens (Human) OX=9606 GN=ISYNA1 PE=1 SV=1	ISYNA1	3.10417	0.00810417	Yes	0.024877	Yes	2.37771
A0A0A0MSQ6;A6NHU9;E7EUA2;H7C1X5;Q9UPX8;Q9UPX8-3;Q9	NA	SHANK2	0.512732	0.00810792	Yes	0.024877	Yes	-2.37757
P13591	>sp|P13591|NCAM1_HUMAN Neural cell adhesion molecule 1 OS=Homo sapiens (Human) OX=9606 GN=NCAM1 PE=1 SV=3	NCAM1	1.28408	0.00819708	Yes	0.0250858	Yes	2.37375
Q96CX2	>sp|Q96CX2|KCD12_HUMAN BTB/POZ domain-containing protein KCTD12 OS=Homo sapiens (Human) OX=9606 GN=KCTD12 PE=1 SV=1	KCTD12	1.40387	0.00841958	Yes	0.0257005	Yes	2.36443
O95183	>sp|O95183|VAMP5_HUMAN Vesicle-associated membrane protein 5 OS=Homo sapiens (Human) OX=9606 GN=VAMP5 PE=1 SV=1	VAMP5	2.01908	0.00851667	Yes	0.0259302	Yes	2.35984
Q12955	>sp|Q12955|ANK3_HUMAN Ankyrin-3 OS=Homo sapiens (Human) OX=9606 GN=ANK3 PE=1 SV=3	ANK3	0.702614	0.00857583	Yes	0.0259771	Yes	-2.35734
Q9NS69	>sp|Q9NS69|TOM22_HUMAN Mitochondrial import receptor subunit TOM22 homolog OS=Homo sapiens (Human) OX=9606 GN=TOMM22 PE=1 SV=3	TOMM22	0.524821	0.00855958	Yes	0.0259771	Yes	-2.3579
O95782;O95782-2	>sp|O95782|AP2A1_HUMAN AP-2 complex subunit alpha-1 OS=Homo sapiens (Human) OX=9606 GN=AP2A1 PE=1 SV=3;>sp|O95782-2|AP2A1-2_HUMAN Isoform of O95782, Isoform B of AP-2 complex subunit alpha-1 OS=Homo sapiens (Human) OX=9606 GN=AP2A1 PE=1 SV=3	AP2A1	0.778947	0.00865833	Yes	0.0260939	Yes	-2.35372
P00367	>sp|P00367|DHE3_HUMAN Glutamate dehydrogenase 1, mitochondrial OS=Homo sapiens (Human) OX=9606 GN=GLUD1 PE=1 SV=2	GLUD1	1.42355	0.00863833	Yes	0.0260939	Yes	2.35457
P07195	>sp|P07195|LDHB_HUMAN L-lactate dehydrogenase B chain OS=Homo sapiens (Human) OX=9606 GN=LDHB PE=1 SV=2	LDHB	1.28113	0.00874875	Yes	0.0262332	Yes	2.35003
C9JTE0;Q16653	>tr|C9JTE0|C9JTE0_HUMAN Isoform of Q16653, Myelin-oligodendrocyte glycoprotein OS=Homo sapiens (Human) OX=9606 GN=MOG PE=1 SV=1;>sp|Q16653|MOG_HUMAN Myelin-oligodendrocyte glycoprotein OS=Homo sapiens (Human) OX=9606 GN=MOG PE=1 SV=2	MOG	0.541221	0.00873583	Yes	0.0262332	Yes	-2.35038
P60953	>sp|P60953|CDC42_HUMAN Cell division control protein 42 homolog OS=Homo sapiens (Human) OX=9606 GN=CDC42 PE=1 SV=2	CDC42	1.55875	0.00880125	Yes	0.0263241	Yes	2.34796
H0YI72;Q7Z6G8-10;Q7Z6G8-2;Q7Z6G8-3;Q7Z6G8-5	>tr|H0YI72|H0YI72_HUMAN Isoform of Q7Z6G8, Ankyrin repeat and sterile alpha motif domain-containing protein 1B (Fragment) OS=Homo sapiens (Human) OX=9606 GN=ANKS1B PE=1 SV=1;>sp|Q7Z6G8-10|ANS1B-10_HUMAN Isoform of Q7Z6G8, Isoform 10 of Ankyrin repeat and sterile alpha motif domain-containing protein 1B OS=Homo sapiens (Human) OX=9606 GN=ANKS1B PE=1 SV=2;>sp|Q7Z6G8-2|ANS1B-2_HUMAN Isoform of Q7Z6G…	ANKS1B	0.574047	0.00892208	Yes	0.0264194	Yes	-2.34282
A0A087WYG2;E9PFH7;Q9UPT6	>tr|A0A087WYG2|A0A087WYG2_HUMAN Isoform of Q9UPT6, C-Jun-amino-terminal kinase-interacting protein 3 OS=Homo sapiens (Human) OX=9606 GN=MAPK8IP3 PE=1 SV=1;>tr|E9PFH7|E9PFH7_HUMAN Isoform of Q9UPT6, C-Jun-amino-terminal kinase-interacting protein 3 OS=Homo sapiens (Human) OX=9606 GN=MAPK8IP3 PE=1 SV=1;>sp|Q9UPT6|JIP3_HUMAN C-Jun-amino-terminal kinase-interacting protein 3 OS=Homo sapiens (Human) O…	MAPK8IP3	0.704157	0.00891792	Yes	0.0264194	Yes	-2.343
Q00013;Q00013-2;Q00013-3	>sp|Q00013|EM55_HUMAN 55 kDa erythrocyte membrane protein OS=Homo sapiens (Human) OX=9606 GN=MPP1 PE=1 SV=2;>sp|Q00013-2|EM55-2_HUMAN Isoform of Q00013, Isoform 2 of 55 kDa erythrocyte membrane protein OS=Homo sapiens (Human) OX=9606 GN=MPP1 PE=1 SV=2;>sp|Q00013-3|EM55-3_HUMAN Isoform of Q00013, Isoform 3 of 55 kDa erythrocyte membrane protein OS=Homo sapiens (Human) OX=9606 GN=MPP1 PE=1 SV=2	MPP1	0.654249	0.00886042	Yes	0.0264194	Yes	-2.34536
E9PGT1;Q15631	>tr|E9PGT1|E9PGT1_HUMAN Isoform of Q15631, Translin OS=Homo sapiens (Human) OX=9606 GN=TSN PE=1 SV=1;>sp|Q15631|TSN_HUMAN Translin OS=Homo sapiens (Human) OX=9606 GN=TSN PE=1 SV=1	TSN	1.57392	0.00888208	Yes	0.0264194	Yes	2.34466
A0A087X208;O00468;O00468-2;O00468-3;O00468-4;O0046	NA	AGRN	1.70882	0.0090475	Yes	0.0267241	Yes	2.3377
P06396-2	>sp|P06396-2|GELS-2_HUMAN Isoform of P06396, Isoform 2 of Gelsolin OS=Homo sapiens (Human) OX=9606 GN=GSN PE=1 SV=1	GSN	1.63888	0.00907625	Yes	0.0267425	Yes	2.33652
Q13367	>sp|Q13367|AP3B2_HUMAN AP-3 complex subunit beta-2 OS=Homo sapiens (Human) OX=9606 GN=AP3B2 PE=1 SV=2	AP3B2	0.766357	0.00916292	Yes	0.026931	Yes	-2.33321
E9PDG8;O60641	>tr|E9PDG8|E9PDG8_HUMAN Isoform of O60641, ENTH domain-containing protein OS=Homo sapiens (Human) OX=9606 GN=SNAP91 PE=1 SV=1;>sp|O60641|AP180_HUMAN Clathrin coat assembly protein AP180 OS=Homo sapiens (Human) OX=9606 GN=SNAP91 PE=1 SV=2	SNAP91	0.758657	0.00926583	Yes	0.0271663	Yes	-2.32944
A0A087WX97;Q9BXK5	>tr|A0A087WX97|A0A087WX97_HUMAN Isoform of Q9BXK5, Bcl-2-like protein 13 OS=Homo sapiens (Human) OX=9606 GN=BCL2L13 PE=1 SV=1;>sp|Q9BXK5|B2L13_HUMAN Bcl-2-like protein 13 OS=Homo sapiens (Human) OX=9606 GN=BCL2L13 PE=1 SV=1	BCL2L13	0.665779	0.00934458	Yes	0.0273297	Yes	-2.32641
P60174;P60174-1	>sp|P60174|TPIS_HUMAN Triosephosphate isomerase OS=Homo sapiens (Human) OX=9606 GN=TPI1 PE=1 SV=3;>sp|P60174-1|TPIS-1_HUMAN Isoform of P60174, Isoform 2 of Triosephosphate isomerase OS=Homo sapiens (Human) OX=9606 GN=TPI1 PE=1 SV=3	TPI1	1.81056	0.0094675	Yes	0.0276211	Yes	2.32158
K7EPS3;Q9GZN7	>tr|K7EPS3|K7EPS3_HUMAN Isoform of Q9GZN7, Protein rogdi homolog (Fragment) OS=Homo sapiens (Human) OX=9606 GN=ROGDI PE=1 SV=8;>sp|Q9GZN7|ROGDI_HUMAN Protein rogdi homolog OS=Homo sapiens (Human) OX=9606 GN=ROGDI PE=1 SV=1	ROGDI	0.733404	0.00950708	Yes	0.0276686	Yes	-2.32001
H7C1U8;Q9BUR5;Q9BUR5-2	>tr|H7C1U8|H7C1U8_HUMAN Isoform of Q9BUR5, MICOS complex subunit (Fragment) OS=Homo sapiens (Human) OX=9606 GN=APOO PE=1 SV=1;>sp|Q9BUR5|MIC26_HUMAN MICOS complex subunit MIC26 OS=Homo sapiens (Human) OX=9606 GN=APOO PE=1 SV=1;>sp|Q9BUR5-2|MIC26-2_HUMAN Isoform of Q9BUR5, Isoform 2 of MICOS complex subunit MIC26 OS=Homo sapiens (Human) OX=9606 GN=APOO PE=1 SV=1	APOO	0.701348	0.00961167	Yes	0.0279046	Yes	-2.31632
Q9Y512	>sp|Q9Y512|SAM50_HUMAN Sorting and assembly machinery component 50 homolog OS=Homo sapiens (Human) OX=9606 GN=SAMM50 PE=1 SV=3	SAMM50	0.746923	0.00968	Yes	0.0280344	Yes	-2.31402
O95817	>sp|O95817|BAG3_HUMAN BAG family molecular chaperone regulator 3 OS=Homo sapiens (Human) OX=9606 GN=BAG3 PE=1 SV=3	BAG3	2.47063	0.00970667	Yes	0.0280433	Yes	2.31312
K7EQG4;O00168	>tr|K7EQG4|K7EQG4_HUMAN Isoform of O00168, FXYD domain-containing ion transport regulator (Fragment) OS=Homo sapiens (Human) OX=9606 GN=FXYD1 PE=1 SV=2;>sp|O00168|PLM_HUMAN Phospholemman OS=Homo sapiens (Human) OX=9606 GN=FXYD1 PE=1 SV=2	FXYD1	2.4501	0.00980583	Yes	0.028261	Yes	2.30928
Q08495;Q08495-4	>sp|Q08495|DEMA_HUMAN Dematin OS=Homo sapiens (Human) OX=9606 GN=DMTN PE=1 SV=3;>sp|Q08495-4|DEMA-4_HUMAN Isoform of Q08495, Isoform 4 of Dematin OS=Homo sapiens (Human) OX=9606 GN=DMTN PE=1 SV=3	DMTN	0.627777	0.00985458	Yes	0.0282643	Yes	-2.30757
P55084;P55084-2	>sp|P55084|ECHB_HUMAN Trifunctional enzyme subunit beta, mitochondrial OS=Homo sapiens (Human) OX=9606 GN=HADHB PE=1 SV=3;>sp|P55084-2|ECHB-2_HUMAN Isoform of P55084, Isoform 2 of Trifunctional enzyme subunit beta, mitochondrial OS=Homo sapiens (Human) OX=9606 GN=HADHB PE=1 SV=3	HADHB	1.40428	0.00983125	Yes	0.0282643	Yes	2.30845
Q01082	>sp|Q01082|SPTB2_HUMAN Spectrin beta chain, non-erythrocytic 1 OS=Homo sapiens (Human) OX=9606 GN=SPTBN1 PE=1 SV=2	SPTBN1	1.261	0.00988208	Yes	0.0282749	Yes	2.30662
Q8TBF8	>sp|Q8TBF8|FA81A_HUMAN Protein FAM81A OS=Homo sapiens (Human) OX=9606 GN=FAM81A PE=2 SV=3	FAM81A	0.64165	0.00991667	Yes	0.0283056	Yes	-2.30532
Q8WZA9	>sp|Q8WZA9|IRGQ_HUMAN Immunity-related GTPase family Q protein OS=Homo sapiens (Human) OX=9606 GN=IRGQ PE=1 SV=1	IRGQ	0.572202	0.0101954	Yes	0.0288571	Yes	-2.29594
Q14289	>sp|Q14289|FAK2_HUMAN Protein-tyrosine kinase 2-beta OS=Homo sapiens (Human) OX=9606 GN=PTK2B PE=1 SV=2	PTK2B	0.619058	0.0101675	Yes	0.0288571	Yes	-2.29715
P22695	>sp|P22695|QCR2_HUMAN Cytochrome b-c1 complex subunit 2, mitochondrial OS=Homo sapiens (Human) OX=9606 GN=UQCRC2 PE=1 SV=3	UQCRC2	0.711335	0.0102071	Yes	0.0288571	Yes	-2.29563
O15240;Q05BJ3	>sp|O15240|VGF_HUMAN Neurosecretory protein VGF OS=Homo sapiens (Human) OX=9606 GN=VGF PE=1 SV=2;>tr|Q05BJ3|Q05BJ3_HUMAN Isoform of O15240, Neurosecretory protein VGF OS=Homo sapiens (Human) OX=9606 GN=VGF PE=1 SV=1	VGF	0.580798	0.0101933	Yes	0.0288571	Yes	-2.29606
G3XA86;Q9Y2Z9;Q9Y2Z9-2;Q9Y2Z9-3	>tr|G3XA86|G3XA86_HUMAN Ubiquinone biosynthesis monooxygenase COQ6 OS=Homo sapiens GN=COQ6 PE=1 SV=2;>sp|Q9Y2Z9|COQ6_HUMAN Ubiquinone biosynthesis monooxygenase COQ6, mitochondrial OS=Homo sapiens (Human) OX=9606 GN=COQ6 PE=1 SV=2;>sp|Q9Y2Z9-2|COQ6-2_HUMAN Isoform of Q9Y2Z9, Isoform 2 of Ubiquinone biosynthesis monooxygenase COQ6, mitochondrial OS=Homo sapiens (Human) OX=9606 GN=COQ6 PE=1 SV=2;>s…	COQ6	0.439182	0.0105863	Yes	0.029806	Yes	-2.28164
P21796	>sp|P21796|VDAC1_HUMAN Voltage-dependent anion-selective channel protein 1 OS=Homo sapiens (Human) OX=9606 GN=VDAC1 PE=1 SV=2	VDAC1	0.832872	0.0105929	Yes	0.029806	Yes	-2.28139
Q86SK9;Q86SK9-2	>sp|Q86SK9|SCD5_HUMAN Stearoyl-CoA desaturase 5 OS=Homo sapiens (Human) OX=9606 GN=SCD5 PE=1 SV=2;>sp|Q86SK9-2|SCD5-2_HUMAN Isoform of Q86SK9, Isoform 2 of Stearoyl-CoA desaturase 5 OS=Homo sapiens (Human) OX=9606 GN=SCD5 PE=1 SV=2	SCD5	2.19933	0.0106792	Yes	0.0299776	Yes	2.27836
Q9H9B4	>sp|Q9H9B4|SFXN1_HUMAN Sideroflexin-1 OS=Homo sapiens (Human) OX=9606 GN=SFXN1 PE=1 SV=4	SFXN1	0.812863	0.010745	Yes	0.0300913	Yes	-2.27611
Q9UHY1	>sp|Q9UHY1|NRBP_HUMAN Nuclear receptor-binding protein OS=Homo sapiens (Human) OX=9606 GN=NRBP1 PE=1 SV=1	NRBP1	0.676715	0.0108154	Yes	0.0302172	Yes	-2.27383
C9J0J7;G5E9Q6;P35080-2	>tr|C9J0J7|C9J0J7_HUMAN Isoform of P35080, Profilin OS=Homo sapiens (Human) OX=9606 GN=PFN2 PE=1 SV=1;>tr|G5E9Q6|G5E9Q6_HUMAN Isoform of P35080, Profilin OS=Homo sapiens (Human) OX=9606 GN=PFN2 PE=1 SV=1;>sp|P35080-2|PROF2-2_HUMAN Isoform of P35080, Isoform IIb of Profilin-2 OS=Homo sapiens (Human) OX=9606 GN=PFN2 PE=1 SV=3	PFN2	1.34151	0.0109083	Yes	0.0304053	Yes	2.2708
O14576;O14576-2;O14576-3;O14576-5	>sp|O14576|DC1I1_HUMAN Cytoplasmic dynein 1 intermediate chain 1 OS=Homo sapiens (Human) OX=9606 GN=DYNC1I1 PE=1 SV=2;>sp|O14576-2|DC1I1-2_HUMAN Isoform of O14576, Isoform 2 of Cytoplasmic dynein 1 intermediate chain 1 OS=Homo sapiens (Human) OX=9606 GN=DYNC1I1 PE=1 SV=2;>sp|O14576-3|DC1I1-3_HUMAN Isoform of O14576, Isoform 3 of Cytoplasmic dynein 1 intermediate chain 1 OS=Homo sapiens (Human) OX…	DYNC1I1	0.649062	0.0109862	Yes	0.0305507	Yes	-2.26793
O75569;O75569-2;O75569-3	>sp|O75569|PRKRA_HUMAN Interferon-inducible double-stranded RNA-dependent protein kinase activator A OS=Homo sapiens (Human) OX=9606 GN=PRKRA PE=1 SV=1;>sp|O75569-2|PRKRA-2_HUMAN Isoform of O75569, Isoform 2 of Interferon-inducible double-stranded RNA-dependent protein kinase activator A OS=Homo sapiens (Human) OX=9606 GN=PRKRA PE=1 SV=1;>sp|O75569-3|PRKRA-3_HUMAN Isoform of O75569, Isoform 3 of …	PRKRA	0.711632	0.0111467	Yes	0.0309244	Yes	-2.26301
P06733	>sp|P06733|ENOA_HUMAN Alpha-enolase OS=Homo sapiens (Human) OX=9606 GN=ENO1 PE=1 SV=2	ENO1	2.08007	0.0112525	Yes	0.0310728	Yes	2.25936
Q08209	>sp|Q08209|PP2BA_HUMAN Serine/threonine-protein phosphatase 2B catalytic subunit alpha isoform OS=Homo sapiens (Human) OX=9606 GN=PPP3CA PE=1 SV=1	PPP3CA	0.795275	0.0112379	Yes	0.0310728	Yes	-2.25989
Q8N9F7;Q8N9F7-2;Q8N9F7-3	>sp|Q8N9F7|GDPD1_HUMAN Lysophospholipase D GDPD1 OS=Homo sapiens (Human) OX=9606 GN=GDPD1 PE=1 SV=2;>sp|Q8N9F7-2|GDPD1-2_HUMAN Isoform of Q8N9F7, Isoform 2 of Lysophospholipase D GDPD1 OS=Homo sapiens (Human) OX=9606 GN=GDPD1 PE=1 SV=2;>sp|Q8N9F7-3|GDPD1-3_HUMAN Isoform of Q8N9F7, Isoform 3 of Lysophospholipase D GDPD1 OS=Homo sapiens (Human) OX=9606 GN=GDPD1 PE=1 SV=2	GDPD1	0.641928	0.0114996	Yes	0.0316815	Yes	-2.2512
P42262	>sp|P42262|GRIA2_HUMAN Glutamate receptor 2 OS=Homo sapiens (Human) OX=9606 GN=GRIA2 PE=1 SV=3	GRIA2	0.767102	0.0115854	Yes	0.0317705	Yes	-2.24829
G3V448;Q9H3N1	>tr|G3V448|G3V448_HUMAN Isoform of Q9H3N1, Thioredoxin domain-containing protein OS=Homo sapiens (Human) OX=9606 GN=TMX1 PE=1 SV=1;>sp|Q9H3N1|TMX1_HUMAN Thioredoxin-related transmembrane protein 1 OS=Homo sapiens (Human) OX=9606 GN=TMX1 PE=1 SV=1	TMX1	1.4606	0.0115712	Yes	0.0317705	Yes	2.24874
P36871	>sp|P36871|PGM1_HUMAN Phosphoglucomutase-1 OS=Homo sapiens (Human) OX=9606 GN=PGM1 PE=1 SV=3	PGM1	1.61975	0.0116329	Yes	0.0318273	Yes	2.24669
H9KV31;O15394	>tr|H9KV31|H9KV31_HUMAN Isoform of O15394, Neural cell adhesion molecule 2 OS=Homo sapiens (Human) OX=9606 GN=NCAM2 PE=1 SV=2;>sp|O15394|NCAM2_HUMAN Neural cell adhesion molecule 2 OS=Homo sapiens (Human) OX=9606 GN=NCAM2 PE=1 SV=2	NCAM2	1.2711	0.0118683	Yes	0.0323967	Yes	2.23947
P56181	>sp|P56181|NDUV3_HUMAN NADH dehydrogenase [ubiquinone] flavoprotein 3, mitochondrial OS=Homo sapiens (Human) OX=9606 GN=NDUFV3 PE=1 SV=2	NDUFV3	0.390006	0.0119058	Yes	0.0324149	Yes	-2.23814
Q9BYB0;Q9BYB0-3	>sp|Q9BYB0|SHAN3_HUMAN SH3 and multiple ankyrin repeat domains protein 3 OS=Homo sapiens (Human) OX=9606 GN=SHANK3 PE=1 SV=3;>sp|Q9BYB0-3|SHAN3-3_HUMAN Isoform of Q9BYB0, Isoform 2 of SH3 and multiple ankyrin repeat domains protein 3 OS=Homo sapiens (Human) OX=9606 GN=SHANK3 PE=1 SV=3	SHANK3	0.627644	0.0119296	Yes	0.0324149	Yes	-2.23733
Q8TBG9-2	>sp|Q8TBG9-2|SYNPR-2_HUMAN Isoform of Q8TBG9, Isoform 2 of Synaptoporin OS=Homo sapiens (Human) OX=9606 GN=SYNPR PE=2 SV=1	SYNPR	1.36364	0.0119787	Yes	0.0324741	Yes	2.2357
P36957	>sp|P36957|ODO2_HUMAN Dihydrolipoyllysine-residue succinyltransferase component of 2-oxoglutarate dehydrogenase complex, mitochondrial OS=Homo sapiens (Human) OX=9606 GN=DLST PE=1 SV=4	DLST	0.645711	0.0120775	Yes	0.032593	Yes	-2.23288
O94826	>sp|O94826|TOM70_HUMAN Mitochondrial import receptor subunit TOM70 OS=Homo sapiens (Human) OX=9606 GN=TOMM70 PE=1 SV=1	TOMM70	0.776768	0.0120767	Yes	0.032593	Yes	-2.23293
O95140	>sp|O95140|MFN2_HUMAN Mitofusin-2 OS=Homo sapiens (Human) OX=9606 GN=MFN2 PE=1 SV=3	MFN2	0.702413	0.0122375	Yes	0.0329499	Yes	-2.22843
A8MT37;P49840	>tr|A8MT37|A8MT37_HUMAN Isoform of P49840, Protein kinase domain-containing protein OS=Homo sapiens (Human) OX=9606 GN=GSK3A PE=1 SV=2;>sp|P49840|GSK3A_HUMAN Glycogen synthase kinase-3 alpha OS=Homo sapiens (Human) OX=9606 GN=GSK3A PE=1 SV=2	GSK3A	0.758484	0.0123088	Yes	0.0330668	Yes	-2.2264
O60869;O60869-2;O60869-3	>sp|O60869|EDF1_HUMAN Endothelial differentiation-related factor 1 OS=Homo sapiens (Human) OX=9606 GN=EDF1 PE=1 SV=1;>sp|O60869-2|EDF1-2_HUMAN Isoform of O60869, Isoform 2 of Endothelial differentiation-related factor 1 OS=Homo sapiens (Human) OX=9606 GN=EDF1 PE=1 SV=1;>sp|O60869-3|EDF1-3_HUMAN Isoform of O60869, Isoform 3 of Endothelial differentiation-related factor 1 OS=Homo sapiens (Human) OX…	EDF1	0.440522	0.0124129	Yes	0.0332713	Yes	-2.22312
P50990	>sp|P50990|TCPQ_HUMAN T-complex protein 1 subunit theta OS=Homo sapiens (Human) OX=9606 GN=CCT8 PE=1 SV=4	CCT8	0.783521	0.0124979	Yes	0.0334237	Yes	-2.22047
K4DI93;Q13620;Q13620-1;Q13620-3	>tr|K4DI93|K4DI93_HUMAN Isoform of Q13620, CULLIN_2 domain-containing protein OS=Homo sapiens (Human) OX=9606 GN=CUL4B PE=1 SV=1;>sp|Q13620|CUL4B_HUMAN Cullin-4B OS=Homo sapiens (Human) OX=9606 GN=CUL4B PE=1 SV=4;>sp|Q13620-1|CUL4B-1_HUMAN Isoform of Q13620, Isoform 2 of Cullin-4B OS=Homo sapiens (Human) OX=9606 GN=CUL4B PE=1 SV=4;>sp|Q13620-3|CUL4B-3_HUMAN Isoform of Q13620, Isoform 3 of Cullin-…	CUL4B	0.820092	0.0125525	Yes	0.0334943	Yes	-2.21904
O43747;O43747-2	>sp|O43747|AP1G1_HUMAN AP-1 complex subunit gamma-1 OS=Homo sapiens (Human) OX=9606 GN=AP1G1 PE=1 SV=5;>sp|O43747-2|AP1G1-2_HUMAN Isoform of O43747, Isoform 2 of AP-1 complex subunit gamma-1 OS=Homo sapiens (Human) OX=9606 GN=AP1G1 PE=1 SV=5	AP1G1	0.811553	0.0126671	Yes	0.0336488	Yes	-2.21578
A0A087X294;O75914;O75914-2;O75914-3;O75914-4	>tr|A0A087X294|A0A087X294_HUMAN Isoform of O75914, Non-specific serine/threonine protein kinase OS=Homo sapiens (Human) OX=9606 GN=PAK3 PE=1 SV=1;>sp|O75914|PAK3_HUMAN Serine/threonine-protein kinase PAK 3 OS=Homo sapiens (Human) OX=9606 GN=PAK3 PE=1 SV=2;>sp|O75914-2|PAK3-2_HUMAN Isoform of O75914, Isoform 2 of Serine/threonine-protein kinase PAK 3 OS=Homo sapiens (Human) OX=9606 GN=PAK3 PE=1 SV…	PAK3	0.738408	0.0126429	Yes	0.0336488	Yes	-2.21656
Q16864;Q16864-2	>sp|Q16864|VATF_HUMAN V-type proton ATPase subunit F OS=Homo sapiens (Human) OX=9606 GN=ATP6V1F PE=1 SV=2;>sp|Q16864-2|VATF-2_HUMAN Isoform of Q16864, Isoform 2 of V-type proton ATPase subunit F OS=Homo sapiens (Human) OX=9606 GN=ATP6V1F PE=1 SV=2	ATP6V1F	0.653435	0.0127179	Yes	0.0337084	Yes	-2.21436
Q96P47;Q96P47-2;Q96P47-4	>sp|Q96P47|AGAP3_HUMAN Arf-GAP with GTPase, ANK repeat and PH domain-containing protein 3 OS=Homo sapiens (Human) OX=9606 GN=AGAP3 PE=1 SV=2;>sp|Q96P47-2|AGAP3-2_HUMAN Isoform of Q96P47, Isoform 2 of Arf-GAP with GTPase, ANK repeat and PH domain-containing protein 3 OS=Homo sapiens (Human) OX=9606 GN=AGAP3 PE=1 SV=2;>sp|Q96P47-4|AGAP3-4_HUMAN Isoform of Q96P47, Isoform 4 of Arf-GAP with GTPase, A…	AGAP3	0.815856	0.0128067	Yes	0.033868	Yes	-2.21171
Q3ZCQ8;Q3ZCQ8-2	>sp|Q3ZCQ8|TIM50_HUMAN Mitochondrial import inner membrane translocase subunit TIM50 OS=Homo sapiens (Human) OX=9606 GN=TIMM50 PE=1 SV=2;>sp|Q3ZCQ8-2|TIM50-2_HUMAN Isoform of Q3ZCQ8, Isoform 2 of Mitochondrial import inner membrane translocase subunit TIM50 OS=Homo sapiens (Human) OX=9606 GN=TIMM50 PE=1 SV=2	TIMM50	0.787543	0.0128667	Yes	0.0339511	Yes	-2.20982
Q8IU85;Q8IU85-2	>sp|Q8IU85|KCC1D_HUMAN Calcium/calmodulin-dependent protein kinase type 1D OS=Homo sapiens (Human) OX=9606 GN=CAMK1D PE=1 SV=1;>sp|Q8IU85-2|KCC1D-2_HUMAN Isoform of Q8IU85, Isoform 2 of Calcium/calmodulin-dependent protein kinase type 1D OS=Homo sapiens (Human) OX=9606 GN=CAMK1D PE=1 SV=1	CAMK1D	0.76862	0.0128996	Yes	0.0339625	Yes	-2.20864
C9JYN0;Q16563-2	>tr|C9JYN0|C9JYN0_HUMAN Isoform of Q16563, MARVEL domain-containing protein OS=Homo sapiens (Human) OX=9606 GN=SYPL1 PE=1 SV=1;>sp|Q16563-2|SYPL1-2_HUMAN Isoform of Q16563, Isoform 2 of Synaptophysin-like protein 1 OS=Homo sapiens (Human) OX=9606 GN=SYPL1 PE=1 SV=1	SYPL1	1.49884	0.0130358	Yes	0.0342453	Yes	2.20506
G3V4F7;P61011;P61011-2	>tr|G3V4F7|G3V4F7_HUMAN Isoform of P61011, Signal recognition particle 54 kDa protein OS=Homo sapiens (Human) OX=9606 GN=SRP54 PE=1 SV=1;>sp|P61011|SRP54_HUMAN Signal recognition particle 54 kDa protein OS=Homo sapiens (Human) OX=9606 GN=SRP54 PE=1 SV=1;>sp|P61011-2|SRP54-2_HUMAN Isoform of P61011, Isoform 2 of Signal recognition particle 54 kDa protein OS=Homo sapiens (Human) OX=9606 GN=SRP54 PE…	SRP54	0.639064	0.0130754	Yes	0.0342734	Yes	-2.20409
Q13492;Q13492-2;Q13492-3;Q13492-5	>sp|Q13492|PICAL_HUMAN Phosphatidylinositol-binding clathrin assembly protein OS=Homo sapiens (Human) OX=9606 GN=PICALM PE=1 SV=2;>sp|Q13492-2|PICAL-2_HUMAN Isoform of Q13492, Isoform 2 of Phosphatidylinositol-binding clathrin assembly protein OS=Homo sapiens (Human) OX=9606 GN=PICALM PE=1 SV=2;>sp|Q13492-3|PICAL-3_HUMAN Isoform of Q13492, Isoform 3 of Phosphatidylinositol-binding clathrin assemb…	PICALM	0.688809	0.0131212	Yes	0.0343178	Yes	-2.20303
P62760	>sp|P62760|VISL1_HUMAN Visinin-like protein 1 OS=Homo sapiens (Human) OX=9606 GN=VSNL1 PE=1 SV=2	VSNL1	0.692564	0.0132762	Yes	0.0346469	Yes	-2.19893
D6RI11;O14810	>tr|D6RI11|D6RI11_HUMAN Isoform of O14810, Complexin-1 OS=Homo sapiens (Human) OX=9606 GN=CPLX1 PE=1 SV=1;>sp|O14810|CPLX1_HUMAN Complexin-1 OS=Homo sapiens (Human) OX=9606 GN=CPLX1 PE=1 SV=1	CPLX1	0.225993	0.0133567	Yes	0.0346641	Yes	-2.19659
P26232-2	>sp|P26232-2|CTNA2-2_HUMAN Isoform of P26232, Isoform 2 of Catenin alpha-2 OS=Homo sapiens (Human) OX=9606 GN=CTNNA2 PE=1 SV=5	CTNNA2	1.23391	0.0133704	Yes	0.0346641	Yes	2.19628
O14490-2;O14490-3;O14490-6	>sp|O14490-2|DLGP1-2_HUMAN Isoform of O14490, Isoform 2 of Disks large-associated protein 1 OS=Homo sapiens (Human) OX=9606 GN=DLGAP1 PE=2 SV=1;>sp|O14490-3|DLGP1-3_HUMAN Isoform of O14490, Isoform 3 of Disks large-associated protein 1 OS=Homo sapiens (Human) OX=9606 GN=DLGAP1 PE=2 SV=1;>sp|O14490-6|DLGP1-6_HUMAN Isoform of O14490, Isoform 6 of Disks large-associated protein 1 OS=Homo sapiens (Hu…	DLGAP1	0.74566	0.013345	Yes	0.0346641	Yes	-2.19696
O94760	>sp|O94760|DDAH1_HUMAN N(G),N(G)-dimethylarginine dimethylaminohydrolase 1 OS=Homo sapiens (Human) OX=9606 GN=DDAH1 PE=1 SV=3	DDAH1	1.41598	0.0134867	Yes	0.0348543	Yes	2.1932
B5MCQ6;B5MCU6;Q96DB2	>tr|B5MCQ6|B5MCQ6_HUMAN Isoform of Q96DB2, Hist_deacetyl domain-containing protein OS=Homo sapiens (Human) OX=9606 GN=HDAC11 PE=1 SV=1;>tr|B5MCU6|B5MCU6_HUMAN Isoform of Q96DB2, Hist_deacetyl domain-containing protein OS=Homo sapiens (Human) OX=9606 GN=HDAC11 PE=1 SV=1;>sp|Q96DB2|HDA11_HUMAN Histone deacetylase 11 OS=Homo sapiens (Human) OX=9606 GN=HDAC11 PE=1 SV=1	HDAC11	0.468106	0.0135025	Yes	0.0348543	Yes	-2.19284
C9JF17;P05090	>tr|C9JF17|C9JF17_HUMAN Isoform of P05090, Lipocln_cytosolic_FA-bd_dom domain-containing protein (Fragment) OS=Homo sapiens (Human) OX=9606 GN=APOD PE=1 SV=1;>sp|P05090|APOD_HUMAN Apolipoprotein D OS=Homo sapiens (Human) OX=9606 GN=APOD PE=1 SV=1	APOD	1.57056	0.0135379	Yes	0.0348699	Yes	2.19185
Q5T848	>sp|Q5T848|GP158_HUMAN Probable G-protein coupled receptor 158 OS=Homo sapiens (Human) OX=9606 GN=GPR158 PE=1 SV=1	GPR158	0.642702	0.0136267	Yes	0.0350226	Yes	-2.18955
Q16620;Q16620-4;Q16620-6	>sp|Q16620|NTRK2_HUMAN BDNF/NT-3 growth factors receptor OS=Homo sapiens (Human) OX=9606 GN=NTRK2 PE=1 SV=1;>sp|Q16620-4|NTRK2-4_HUMAN Isoform of Q16620, Isoform 4 of BDNF/NT-3 growth factors receptor OS=Homo sapiens (Human) OX=9606 GN=NTRK2 PE=1 SV=1;>sp|Q16620-6|NTRK2-6_HUMAN Isoform of Q16620, Isoform TrkB-T-TK of BDNF/NT-3 growth factors receptor OS=Homo sapiens (Human) OX=9606 GN=NTRK2 PE=1 …	NTRK2	1.35601	0.0137075	Yes	0.0351542	Yes	2.18713
Q04446	>sp|Q04446|GLGB_HUMAN 1,4-alpha-glucan-branching enzyme OS=Homo sapiens (Human) OX=9606 GN=GBE1 PE=1 SV=3	GBE1	1.30003	0.0138746	Yes	0.035506	Yes	2.18266
F5GWR7;P23468;P23468-2;P23468-3;P23468-4;P23468-5;	NA	PTPRD	0.699816	0.0139479	Yes	0.0355405	Yes	-2.18068
A0A0A0MSJ9;Q15283;Q15283-2	>tr|A0A0A0MSJ9|A0A0A0MSJ9_HUMAN Isoform of Q15283, Ras GTPase-activating protein 2 OS=Homo sapiens (Human) OX=9606 GN=RASA2 PE=1 SV=1;>sp|Q15283|RASA2_HUMAN Ras GTPase-activating protein 2 OS=Homo sapiens (Human) OX=9606 GN=RASA2 PE=1 SV=3;>sp|Q15283-2|RASA2-2_HUMAN Isoform of Q15283, Isoform 2 of Ras GTPase-activating protein 2 OS=Homo sapiens (Human) OX=9606 GN=RASA2 PE=1 SV=3	RASA2	0.516873	0.0139192	Yes	0.0355405	Yes	-2.18139
O60268;O60268-3	>sp|O60268|K0513_HUMAN Uncharacterized protein KIAA0513 OS=Homo sapiens (Human) OX=9606 GN=KIAA0513 PE=1 SV=1;>sp|O60268-3|K0513-3_HUMAN Isoform of O60268, Isoform 3 of Uncharacterized protein KIAA0513 OS=Homo sapiens (Human) OX=9606 GN=KIAA0513 PE=1 SV=1	KIAA0513	0.760699	0.0140629	Yes	0.0356043	Yes	-2.17786
Q12874	>sp|Q12874|SF3A3_HUMAN Splicing factor 3A subunit 3 OS=Homo sapiens (Human) OX=9606 GN=SF3A3 PE=1 SV=1	SF3A3	0.427315	0.01406	Yes	0.0356043	Yes	-2.17797
A0A087WSW9;A0A087WSY9;E2QRB9;E9PIR7;E9PNQ6;F8W809;	NA	TXNRD1	1.3784	0.0140613	Yes	0.0356043	Yes	2.17792
O75891;O75891-3	>sp|O75891|AL1L1_HUMAN Cytosolic 10-formyltetrahydrofolate dehydrogenase OS=Homo sapiens (Human) OX=9606 GN=ALDH1L1 PE=1 SV=2;>sp|O75891-3|AL1L1-3_HUMAN Isoform of O75891, Isoform 3 of Cytosolic 10-formyltetrahydrofolate dehydrogenase OS=Homo sapiens (Human) OX=9606 GN=ALDH1L1 PE=1 SV=2	ALDH1L1	1.41936	0.0140946	Yes	0.0356086	Yes	2.17704
Q9Y3C6	>sp|Q9Y3C6|PPIL1_HUMAN Peptidyl-prolyl cis-trans isomerase-like 1 OS=Homo sapiens (Human) OX=9606 GN=PPIL1 PE=1 SV=1	PPIL1	1.58971	0.0142575	Yes	0.0359437	Yes	2.17274
Q14677;Q14677-2;Q14677-3	>sp|Q14677|EPN4_HUMAN Clathrin interactor 1 OS=Homo sapiens (Human) OX=9606 GN=CLINT1 PE=1 SV=1;>sp|Q14677-2|EPN4-2_HUMAN Isoform of Q14677, Isoform 2 of Clathrin interactor 1 OS=Homo sapiens (Human) OX=9606 GN=CLINT1 PE=1 SV=1;>sp|Q14677-3|EPN4-3_HUMAN Isoform of Q14677, Isoform 3 of Clathrin interactor 1 OS=Homo sapiens (Human) OX=9606 GN=CLINT1 PE=1 SV=1	CLINT1	0.652989	0.0143467	Yes	0.0360229	Yes	-2.17054
Q86X10;Q86X10-3	>sp|Q86X10|RLGPB_HUMAN Ral GTPase-activating protein subunit beta OS=Homo sapiens (Human) OX=9606 GN=RALGAPB PE=1 SV=1;>sp|Q86X10-3|RLGPB-3_HUMAN Isoform of Q86X10, Isoform 3 of Ral GTPase-activating protein subunit beta OS=Homo sapiens (Human) OX=9606 GN=RALGAPB PE=1 SV=1	RALGAPB	0.45265	0.0143496	Yes	0.0360229	Yes	-2.17043
Q3KQU3;Q3KQU3-4	>sp|Q3KQU3|MA7D1_HUMAN MAP7 domain-containing protein 1 OS=Homo sapiens (Human) OX=9606 GN=MAP7D1 PE=1 SV=1;>sp|Q3KQU3-4|MA7D1-4_HUMAN Isoform of Q3KQU3, Isoform 4 of MAP7 domain-containing protein 1 OS=Homo sapiens (Human) OX=9606 GN=MAP7D1 PE=1 SV=1	MAP7D1	0.402215	0.01444	Yes	0.0361734	Yes	-2.16803
P13473-2	>sp|P13473-2|LAMP2-2_HUMAN Isoform of P13473, Isoform LAMP-2B of Lysosome-associated membrane glycoprotein 2 OS=Homo sapiens (Human) OX=9606 GN=LAMP2 PE=1 SV=2	LAMP2	1.44556	0.01469	Yes	0.0367222	Yes	2.16178
Q8IXJ6;Q8IXJ6-2;Q8IXJ6-3	>sp|Q8IXJ6|SIR2_HUMAN NAD-dependent protein deacetylase sirtuin-2 OS=Homo sapiens (Human) OX=9606 GN=SIRT2 PE=1 SV=2;>sp|Q8IXJ6-2|SIR2-2_HUMAN Isoform of Q8IXJ6, Isoform 2 of NAD-dependent protein deacetylase sirtuin-2 OS=Homo sapiens (Human) OX=9606 GN=SIRT2 PE=1 SV=2;>sp|Q8IXJ6-3|SIR2-3_HUMAN Isoform of Q8IXJ6, Isoform 3 of NAD-dependent protein deacetylase sirtuin-2 OS=Homo sapiens (Human) OX=…	SIRT2	0.629655	0.0147312	Yes	0.0367479	Yes	-2.16073
E9PCN2;Q02153	>tr|E9PCN2|E9PCN2_HUMAN Isoform of Q02153, Guanylate cyclase domain-containing protein OS=Homo sapiens (Human) OX=9606 GN=GUCY1B1 PE=1 SV=1;>sp|Q02153|GCYB1_HUMAN Guanylate cyclase soluble subunit beta-1 OS=Homo sapiens (Human) OX=9606 GN=GUCY1B1 PE=1 SV=1	GUCY1B1	0.796565	0.0147979	Yes	0.0368368	Yes	-2.15921
E9PC62;O95319;O95319-2;O95319-3;O95319-4;O95319-5;	NA	CELF2	0.549175	0.0148654	Yes	0.0369061	Yes	-2.15771
A0A087X0V8;Q59EK9;Q59EK9-2;Q59EK9-3;Q59EK9-4	>tr|A0A087X0V8|A0A087X0V8_HUMAN RUN domain-containing protein 3A OS=Homo sapiens GN=RUNDC3A PE=4 SV=1;>sp|Q59EK9|RUN3A_HUMAN RUN domain-containing protein 3A OS=Homo sapiens (Human) OX=9606 GN=RUNDC3A PE=1 SV=2;>sp|Q59EK9-2|RUN3A-2_HUMAN Isoform of Q59EK9, Isoform 2 of RUN domain-containing protein 3A OS=Homo sapiens (Human) OX=9606 GN=RUNDC3A PE=2 SV=2;>sp|Q59EK9-3|RUN3A-3_HUMAN Isoform of Q59EK…	RUNDC3A	0.579743	0.0148879	Yes	0.0369061	Yes	-2.15697
Q9BRA2	>sp|Q9BRA2|TXD17_HUMAN Thioredoxin domain-containing protein 17 OS=Homo sapiens (Human) OX=9606 GN=TXNDC17 PE=1 SV=1	TXNDC17	1.64622	0.0149892	Yes	0.0370797	Yes	2.15435
Q8IXS8	>sp|Q8IXS8|F126B_HUMAN Protein FAM126B OS=Homo sapiens (Human) OX=9606 GN=FAM126B PE=1 SV=1	FAM126B	0.689958	0.0150667	Yes	0.037194	Yes	-2.15255
O60741	>sp|O60741|HCN1_HUMAN Potassium/sodium hyperpolarization-activated cyclic nucleotide-gated channel 1 OS=Homo sapiens (Human) OX=9606 GN=HCN1 PE=1 SV=3	HCN1	0.616837	0.0151375	Yes	0.0372161	Yes	-2.15107
P10620	>sp|P10620|MGST1_HUMAN Microsomal glutathione S-transferase 1 OS=Homo sapiens (Human) OX=9606 GN=MGST1 PE=1 SV=1	MGST1	2.01196	0.0151383	Yes	0.0372161	Yes	2.15105
Q9Y265	>sp|Q9Y265|RUVB1_HUMAN RuvB-like 1 OS=Homo sapiens (Human) OX=9606 GN=RUVBL1 PE=1 SV=1	RUVBL1	1.44277	0.0151717	Yes	0.037221	Yes	2.15013
P36405	>sp|P36405|ARL3_HUMAN ADP-ribosylation factor-like protein 3 OS=Homo sapiens (Human) OX=9606 GN=ARL3 PE=1 SV=2	ARL3	1.38369	0.0152858	Yes	0.0373987	Yes	2.14728
P62316	>sp|P62316|SMD2_HUMAN Small nuclear ribonucleoprotein Sm D2 OS=Homo sapiens (Human) OX=9606 GN=SNRPD2 PE=1 SV=1	SNRPD2	1.39823	0.0153071	Yes	0.0373987	Yes	2.14671
Q8NB37;Q8NB37-2;Q8NB37-3	>sp|Q8NB37|GALD1_HUMAN Glutamine amidotransferase-like class 1 domain-containing protein 1 OS=Homo sapiens (Human) OX=9606 GN=GATD1 PE=1 SV=1;>sp|Q8NB37-2|GALD1-2_HUMAN Isoform of Q8NB37, Isoform 2 of Glutamine amidotransferase-like class 1 domain-containing protein 1 OS=Homo sapiens (Human) OX=9606 GN=GATD1 PE=1 SV=1;>sp|Q8NB37-3|GALD1-3_HUMAN Isoform of Q8NB37, Isoform 3 of Glutamine amidotrans…	GATD1	1.56954	0.015365	Yes	0.0374631	Yes	2.14532
A0A087WT45;Q4V328	>tr|A0A087WT45|A0A087WT45_HUMAN Isoform of Q4V328, GRIP1-associated protein 1 OS=Homo sapiens (Human) OX=9606 GN=GRIPAP1 PE=1 SV=1;>sp|Q4V328|GRAP1_HUMAN GRIP1-associated protein 1 OS=Homo sapiens (Human) OX=9606 GN=GRIPAP1 PE=1 SV=2	GRIPAP1	0.710296	0.0155529	Yes	0.0378436	Yes	-2.14107
P56556	>sp|P56556|NDUA6_HUMAN NADH dehydrogenase [ubiquinone] 1 alpha subcomplex subunit 6 OS=Homo sapiens (Human) OX=9606 GN=NDUFA6 PE=1 SV=4	NDUFA6	0.752707	0.0156333	Yes	0.037884	Yes	-2.13911
Q16143	>sp|Q16143|SYUB_HUMAN Beta-synuclein OS=Homo sapiens (Human) OX=9606 GN=SNCB PE=1 SV=1	SNCB	0.609311	0.0156175	Yes	0.037884	Yes	-2.13951
O15079;O15079-2	>sp|O15079|SNPH_HUMAN Syntaphilin OS=Homo sapiens (Human) OX=9606 GN=SNPH PE=1 SV=2;>sp|O15079-2|SNPH-2_HUMAN Isoform of O15079, Isoform 2 of Syntaphilin OS=Homo sapiens (Human) OX=9606 GN=SNPH PE=2 SV=2	SNPH	0.582917	0.0157454	Yes	0.0380005	Yes	-2.13634
Q9UID3	>sp|Q9UID3|VPS51_HUMAN Vacuolar protein sorting-associated protein 51 homolog OS=Homo sapiens (Human) OX=9606 GN=VPS51 PE=1 SV=2	VPS51	0.746631	0.0157254	Yes	0.0380005	Yes	-2.13683
P49407;P49407-2	>sp|P49407|ARRB1_HUMAN Beta-arrestin-1 OS=Homo sapiens (Human) OX=9606 GN=ARRB1 PE=1 SV=2;>sp|P49407-2|ARRB1-2_HUMAN Isoform of P49407, Isoform 1B of Beta-arrestin-1 OS=Homo sapiens (Human) OX=9606 GN=ARRB1 PE=1 SV=2	ARRB1	1.52168	0.0158946	Yes	0.0382827	Yes	2.133
A0A5E8;Q99501	>tr|A0A5E8|A0A5E8_HUMAN Isoform of Q99501, GAS2-like protein 1 OS=Homo sapiens (Human) OX=9606 GN=GAS2L1 PE=1 SV=1;>sp|Q99501|GA2L1_HUMAN GAS2-like protein 1 OS=Homo sapiens (Human) OX=9606 GN=GAS2L1 PE=1 SV=2	GAS2L1	0.644374	0.0159421	Yes	0.0383194	Yes	-2.13174
P35612	>sp|P35612|ADDB_HUMAN Beta-adducin OS=Homo sapiens (Human) OX=9606 GN=ADD2 PE=1 SV=3	ADD2	0.819861	0.0159929	Yes	0.0383639	Yes	-2.13055
Q08AD1;Q08AD1-2;Q08AD1-3	>sp|Q08AD1|CAMP2_HUMAN Calmodulin-regulated spectrin-associated protein 2 OS=Homo sapiens (Human) OX=9606 GN=CAMSAP2 PE=1 SV=3;>sp|Q08AD1-2|CAMP2-2_HUMAN Isoform of Q08AD1, Isoform 2 of Calmodulin-regulated spectrin-associated protein 2 OS=Homo sapiens (Human) OX=9606 GN=CAMSAP2 PE=1 SV=3;>sp|Q08AD1-3|CAMP2-3_HUMAN Isoform of Q08AD1, Isoform 3 of Calmodulin-regulated spectrin-associated protein 2…	CAMSAP2	0.685647	0.0162746	Yes	0.0389609	Yes	-2.12427
Q8WY22	>sp|Q8WY22|BRI3B_HUMAN BRI3-binding protein OS=Homo sapiens (Human) OX=9606 GN=BRI3BP PE=1 SV=1	BRI3BP	0.566501	0.0164362	Yes	0.0392687	Yes	-2.12088
O15511	>sp|O15511|ARPC5_HUMAN Actin-related protein 2/3 complex subunit 5 OS=Homo sapiens (Human) OX=9606 GN=ARPC5 PE=1 SV=3	ARPC5	1.36572	0.0165683	Yes	0.0394435	Yes	2.11795
P12532	>sp|P12532|KCRU_HUMAN Creatine kinase U-type, mitochondrial OS=Homo sapiens (Human) OX=9606 GN=CKMT1B PE=1 SV=1	CKMT1B	0.770783	0.0165758	Yes	0.0394435	Yes	-2.11781
O95057	>sp|O95057|DIRA1_HUMAN GTP-binding protein Di-Ras1 OS=Homo sapiens (Human) OX=9606 GN=DIRAS1 PE=1 SV=1	DIRAS1	0.777624	0.0166533	Yes	0.0394697	Yes	-2.11616
A0A0A0MRU0;B4DZ84;D3DX48;D3DX49;Q14168;Q14168-2;Q1	NA	MPP2	0.751186	0.0166271	Yes	0.0394697	Yes	-2.11671
P40123	>sp|P40123|CAP2_HUMAN Adenylyl cyclase-associated protein 2 OS=Homo sapiens (Human) OX=9606 GN=CAP2 PE=1 SV=1	CAP2	0.783503	0.0168475	Yes	0.0397711	Yes	-2.11191
M0R2Z9;M0R3F6;Q8IX01;Q8IX01-3;Q8IX01-4	>tr|M0R2Z9|M0R2Z9_HUMAN Isoform of Q8IX01, SURP and G-patch domain-containing protein 2 OS=Homo sapiens (Human) OX=9606 GN=SUGP2 PE=1 SV=1;>tr|M0R3F6|M0R3F6_HUMAN Isoform of Q8IX01, SURP and G-patch domain-containing protein 2 OS=Homo sapiens (Human) OX=9606 GN=SUGP2 PE=1 SV=1;>sp|Q8IX01|SUGP2_HUMAN SURP and G-patch domain-containing protein 2 OS=Homo sapiens (Human) OX=9606 GN=SUGP2 PE=1 SV=2;>s…	SUGP2	0.487382	0.0168375	Yes	0.0397711	Yes	-2.11212
H3BLZ8;Q92841;Q92841-1;Q92841-2;Q92841-3	>tr|H3BLZ8|H3BLZ8_HUMAN Probable ATP-dependent RNA helicase DDX17 OS=Homo sapiens GN=DDX17 PE=1 SV=1;>sp|Q92841|DDX17_HUMAN Probable ATP-dependent RNA helicase DDX17 OS=Homo sapiens (Human) OX=9606 GN=DDX17 PE=1 SV=2;>sp|Q92841-1|DDX17-1_HUMAN Isoform of Q92841, Isoform 2 of Probable ATP-dependent RNA helicase DDX17 OS=Homo sapiens (Human) OX=9606 GN=DDX17 PE=1 SV=2;>sp|Q92841-2|DDX17-2_HUMAN Iso…	DDX17	1.26765	0.0171546	Yes	0.0404157	Yes	2.10532
Q9Y696	>sp|Q9Y696|CLIC4_HUMAN Chloride intracellular channel protein 4 OS=Homo sapiens (Human) OX=9606 GN=CLIC4 PE=1 SV=4	CLIC4	2.48666	0.0172121	Yes	0.0404708	Yes	2.10407
P53396	>sp|P53396|ACLY_HUMAN ATP-citrate synthase OS=Homo sapiens (Human) OX=9606 GN=ACLY PE=1 SV=3	ACLY	0.788789	0.0174117	Yes	0.0407753	Yes	-2.09993
Q9UMS0;Q9UMS0-3	>sp|Q9UMS0|NFU1_HUMAN NFU1 iron-sulfur cluster scaffold homolog, mitochondrial OS=Homo sapiens (Human) OX=9606 GN=NFU1 PE=1 SV=2;>sp|Q9UMS0-3|NFU1-3_HUMAN Isoform of Q9UMS0, Isoform 3 of NFU1 iron-sulfur cluster scaffold homolog, mitochondrial OS=Homo sapiens (Human) OX=9606 GN=NFU1 PE=1 SV=2	NFU1	0.590999	0.0174013	Yes	0.0407753	Yes	-2.10023
O15020	>sp|O15020|SPTN2_HUMAN Spectrin beta chain, non-erythrocytic 2 OS=Homo sapiens (Human) OX=9606 GN=SPTBN2 PE=1 SV=3	SPTBN2	0.79067	0.0174446	Yes	0.0407753	Yes	-2.09929
P15924	>sp|P15924|DESP_HUMAN Desmoplakin OS=Homo sapiens (Human) OX=9606 GN=DSP PE=1 SV=3	DSP	1.96485	0.0175558	Yes	0.0409547	Yes	2.09678
O60359	>sp|O60359|CCG3_HUMAN Voltage-dependent calcium channel gamma-3 subunit OS=Homo sapiens (Human) OX=9606 GN=CACNG3 PE=2 SV=1	CACNG3	0.278494	0.0176758	Yes	0.0411538	Yes	-2.09442
K7EL21;Q13938;Q13938-3	>tr|K7EL21|K7EL21_HUMAN Calcyphosin OS=Homo sapiens GN=CAPS PE=4 SV=1;>sp|Q13938|CAYP1_HUMAN Calcyphosin OS=Homo sapiens (Human) OX=9606 GN=CAPS PE=1 SV=2;>sp|Q13938-3|CAYP1-3_HUMAN Isoform of Q13938, Isoform 2 of Calcyphosin OS=Homo sapiens (Human) OX=9606 GN=CAPS PE=1 SV=2	CAPS	2.34634	0.0178021	Yes	0.0412858	Yes	2.09193
O95298	>sp|O95298|NDUC2_HUMAN NADH dehydrogenase [ubiquinone] 1 subunit C2 OS=Homo sapiens (Human) OX=9606 GN=NDUFC2 PE=1 SV=1	NDUFC2	0.778457	0.0177896	Yes	0.0412858	Yes	-2.0922
P22676	>sp|P22676|CALB2_HUMAN Calretinin OS=Homo sapiens (Human) OX=9606 GN=CALB2 PE=2 SV=2	CALB2	1.8424	0.0180158	Yes	0.041619	Yes	2.08729
O95169;O95169-3	>sp|O95169|NDUB8_HUMAN NADH dehydrogenase [ubiquinone] 1 beta subcomplex subunit 8, mitochondrial OS=Homo sapiens (Human) OX=9606 GN=NDUFB8 PE=1 SV=1;>sp|O95169-3|NDUB8-3_HUMAN Isoform of O95169, Isoform 3 of NADH dehydrogenase [ubiquinone] 1 beta subcomplex subunit 8, mitochondrial OS=Homo sapiens (Human) OX=9606 GN=NDUFB8 PE=1 SV=1	NDUFB8	0.758357	0.0180117	Yes	0.041619	Yes	-2.08738
H0YDU8;P53041	>tr|H0YDU8|H0YDU8_HUMAN Isoform of P53041, Serine/threonine-protein phosphatase (Fragment) OS=Homo sapiens (Human) OX=9606 GN=PPP5C PE=1 SV=1;>sp|P53041|PPP5_HUMAN Serine/threonine-protein phosphatase 5 OS=Homo sapiens (Human) OX=9606 GN=PPP5C PE=1 SV=1	PPP5C	0.598035	0.0181313	Yes	0.0416655	Yes	-2.08501
A0A0A0MTB9;H0YAK8;P09455	>tr|A0A0A0MTB9|A0A0A0MTB9_HUMAN Isoform of P09455, FABP domain-containing protein OS=Homo sapiens (Human) OX=9606 GN=RBP1 PE=1 SV=1;>tr|H0YAK8|H0YAK8_HUMAN Isoform of P09455, FABP domain-containing protein OS=Homo sapiens (Human) OX=9606 GN=RBP1 PE=1 SV=2;>sp|P09455|RET1_HUMAN Retinol-binding protein 1 OS=Homo sapiens (Human) OX=9606 GN=RBP1 PE=1 SV=2	RBP1	2.08199	0.0181413	Yes	0.0416655	Yes	2.08484
Q9UBV2	>sp|Q9UBV2|SE1L1_HUMAN Protein sel-1 homolog 1 OS=Homo sapiens (Human) OX=9606 GN=SEL1L PE=1 SV=3	SEL1L	0.682834	0.0180808	Yes	0.0416655	Yes	-2.086
Q9UJ70	>sp|Q9UJ70|NAGK_HUMAN N-acetyl-D-glucosamine kinase OS=Homo sapiens (Human) OX=9606 GN=NAGK PE=1 SV=4	NAGK	1.33392	0.01835	Yes	0.0420398	Yes	2.08054
E9PDQ8;Q96I99;Q96I99-2	>tr|E9PDQ8|E9PDQ8_HUMAN Isoform of Q96I99, ATP-grasp_2 domain-containing protein OS=Homo sapiens (Human) OX=9606 GN=SUCLG2 PE=1 SV=1;>sp|Q96I99|SUCB2_HUMAN Succinate--CoA ligase [GDP-forming] subunit beta, mitochondrial OS=Homo sapiens (Human) OX=9606 GN=SUCLG2 PE=1 SV=2;>sp|Q96I99-2|SUCB2-2_HUMAN Isoform of Q96I99, Isoform 2 of Succinate--CoA ligase [GDP-forming] subunit beta, mitochondrial OS=H…	SUCLG2	1.56411	0.018375	Yes	0.0420398	Yes	2.07997
Q13618;Q13618-2	>sp|Q13618|CUL3_HUMAN Cullin-3 OS=Homo sapiens (Human) OX=9606 GN=CUL3 PE=1 SV=2;>sp|Q13618-2|CUL3-2_HUMAN Isoform of Q13618, Isoform 2 of Cullin-3 OS=Homo sapiens (Human) OX=9606 GN=CUL3 PE=1 SV=2	CUL3	0.801598	0.0185729	Yes	0.0421676	Yes	-2.07599
O14775;O14775-2	>sp|O14775|GNB5_HUMAN Guanine nucleotide-binding protein subunit beta-5 OS=Homo sapiens (Human) OX=9606 GN=GNB5 PE=1 SV=2;>sp|O14775-2|GNB5-2_HUMAN Isoform of O14775, Isoform 2 of Guanine nucleotide-binding protein subunit beta-5 OS=Homo sapiens (Human) OX=9606 GN=GNB5 PE=1 SV=2	GNB5	0.772433	0.0185671	Yes	0.0421676	Yes	-2.07612
B1ANR0;Q13310;Q13310-2;Q13310-3	>tr|B1ANR0|B1ANR0_HUMAN Isoform of Q13310, Polyadenylate-binding protein OS=Homo sapiens (Human) OX=9606 GN=PABPC4 PE=1 SV=1;>sp|Q13310|PABP4_HUMAN Polyadenylate-binding protein 4 OS=Homo sapiens (Human) OX=9606 GN=PABPC4 PE=1 SV=1;>sp|Q13310-2|PABP4-2_HUMAN Isoform of Q13310, Isoform 2 of Polyadenylate-binding protein 4 OS=Homo sapiens (Human) OX=9606 GN=PABPC4 PE=1 SV=1;>sp|Q13310-3|PABP4-3_HUM…	PABPC4	0.519363	0.0185425	Yes	0.0421676	Yes	-2.07663
P52788	>sp|P52788|SPSY_HUMAN Spermine synthase OS=Homo sapiens (Human) OX=9606 GN=SMS PE=1 SV=2	SMS	2.08062	0.0184838	Yes	0.0421676	Yes	2.07781
E5RJ52;P53677	>tr|E5RJ52|E5RJ52_HUMAN Isoform of P53677, MHD domain-containing protein (Fragment) OS=Homo sapiens (Human) OX=9606 GN=AP3M2 PE=1 SV=1;>sp|P53677|AP3M2_HUMAN AP-3 complex subunit mu-2 OS=Homo sapiens (Human) OX=9606 GN=AP3M2 PE=2 SV=1	AP3M2	0.717513	0.0186775	Yes	0.0422435	Yes	-2.07371
Q9P0J0	>sp|Q9P0J0|NDUAD_HUMAN NADH dehydrogenase [ubiquinone] 1 alpha subcomplex subunit 13 OS=Homo sapiens (Human) OX=9606 GN=NDUFA13 PE=1 SV=3	NDUFA13	0.779757	0.0186642	Yes	0.0422435	Yes	-2.07395
P04844;P04844-2	>sp|P04844|RPN2_HUMAN Dolichyl-diphosphooligosaccharide--protein glycosyltransferase subunit 2 OS=Homo sapiens (Human) OX=9606 GN=RPN2 PE=1 SV=3;>sp|P04844-2|RPN2-2_HUMAN Isoform of P04844, Isoform 2 of Dolichyl-diphosphooligosaccharide--protein glycosyltransferase subunit 2 OS=Homo sapiens (Human) OX=9606 GN=RPN2 PE=1 SV=3	RPN2	1.61241	0.018765	Yes	0.0423607	Yes	2.07205
P51991	>sp|P51991|ROA3_HUMAN Heterogeneous nuclear ribonucleoprotein A3 OS=Homo sapiens (Human) OX=9606 GN=HNRNPA3 PE=1 SV=2	HNRNPA3	1.31244	0.0188138	Yes	0.0423902	Yes	2.07094
P12036;P12036-2	>sp|P12036|NFH_HUMAN Neurofilament heavy polypeptide OS=Homo sapiens (Human) OX=9606 GN=NEFH PE=1 SV=4;>sp|P12036-2|NFH-2_HUMAN Isoform of P12036, Isoform 2 of Neurofilament heavy polypeptide OS=Homo sapiens (Human) OX=9606 GN=NEFH PE=1 SV=4	NEFH	0.53177	0.0188633	Yes	0.0424214	Yes	-2.07007
C9JPF8;Q9H9H5	>tr|C9JPF8|C9JPF8_HUMAN Isoform of Q9H9H5, MAP6 domain containing 1, isoform CRA_b OS=Homo sapiens (Human) OX=9606 GN=MAP6D1 PE=1 SV=1;>sp|Q9H9H5|MA6D1_HUMAN MAP6 domain-containing protein 1 OS=Homo sapiens (Human) OX=9606 GN=MAP6D1 PE=1 SV=1	MAP6D1	0.508774	0.0189092	Yes	0.0424441	Yes	-2.06913
Q9NWV4	>sp|Q9NWV4|CZIB_HUMAN CXXC motif containing zinc binding protein OS=Homo sapiens (Human) OX=9606 GN=CZIB PE=1 SV=1	CZIB	1.72798	0.0189542	Yes	0.0424648	Yes	2.06833
Q13554;Q13554-2;Q13554-3;Q13554-4;Q13554-5;Q13554-	NA	CAMK2B	0.751733	0.0190396	Yes	0.0425758	Yes	-2.06667
O94832	>sp|O94832|MYO1D_HUMAN Unconventional myosin-Id OS=Homo sapiens (Human) OX=9606 GN=MYO1D PE=1 SV=2	MYO1D	0.511698	0.0191275	Yes	0.042692	Yes	-2.06503
O43676	>sp|O43676|NDUB3_HUMAN NADH dehydrogenase [ubiquinone] 1 beta subcomplex subunit 3 OS=Homo sapiens (Human) OX=9606 GN=NDUFB3 PE=1 SV=3	NDUFB3	0.782376	0.0192396	Yes	0.0428616	Yes	-2.06285
Q08211	>sp|Q08211|DHX9_HUMAN ATP-dependent RNA helicase A OS=Homo sapiens (Human) OX=9606 GN=DHX9 PE=1 SV=4	DHX9	1.30589	0.0194033	Yes	0.0431455	Yes	2.05974
J3KNV4;Q13683;Q13683-10;Q13683-13;Q13683-3;Q13683-	NA	ITGA7	1.93606	0.0195325	Yes	0.0433515	Yes	2.05724
O75061;O75061-2;O75061-4	>sp|O75061|AUXI_HUMAN Putative tyrosine-protein phosphatase auxilin OS=Homo sapiens (Human) OX=9606 GN=DNAJC6 PE=1 SV=3;>sp|O75061-2|AUXI-2_HUMAN Isoform of O75061, Isoform 2 of Putative tyrosine-protein phosphatase auxilin OS=Homo sapiens (Human) OX=9606 GN=DNAJC6 PE=1 SV=3;>sp|O75061-4|AUXI-4_HUMAN Isoform of O75061, Isoform 4 of Putative tyrosine-protein phosphatase auxilin OS=Homo sapiens (Hu…	DNAJC6	0.819562	0.0196242	Yes	0.0433928	Yes	-2.05551
Q8IVD9	>sp|Q8IVD9|NUDC3_HUMAN NudC domain-containing protein 3 OS=Homo sapiens (Human) OX=9606 GN=NUDCD3 PE=1 SV=3	NUDCD3	0.726375	0.0195942	Yes	0.0433928	Yes	-2.05611
A0A087WTP3;Q92945	>tr|A0A087WTP3|A0A087WTP3_HUMAN Isoform of Q92945, Far upstream element-binding protein 2 OS=Homo sapiens (Human) OX=9606 GN=KHSRP PE=1 SV=1;>sp|Q92945|FUBP2_HUMAN Far upstream element-binding protein 2 OS=Homo sapiens (Human) OX=9606 GN=KHSRP PE=1 SV=4	KHSRP	0.575586	0.01967	Yes	0.0434133	Yes	-2.05462
Q9NR50;Q9NR50-2;Q9NR50-3	>sp|Q9NR50|EI2BG_HUMAN Translation initiation factor eIF-2B subunit gamma OS=Homo sapiens (Human) OX=9606 GN=EIF2B3 PE=1 SV=1;>sp|Q9NR50-2|EI2BG-2_HUMAN Isoform of Q9NR50, Isoform 2 of Translation initiation factor eIF-2B subunit gamma OS=Homo sapiens (Human) OX=9606 GN=EIF2B3 PE=1 SV=1;>sp|Q9NR50-3|EI2BG-3_HUMAN Isoform of Q9NR50, Isoform 3 of Translation initiation factor eIF-2B subunit gamma O…	EIF2B3	0.571621	0.0197454	Yes	0.0434989	Yes	-2.05327
A6NMH8;E9PIF1;E9PJK1;E9PRJ8;H0YDJ9;H0YDL9;P60033	>tr|A6NMH8|A6NMH8_HUMAN Isoform of P60033, Tetraspanin OS=Homo sapiens (Human) OX=9606 GN=CD81 PE=1 SV=1;>tr|E9PIF1|E9PIF1_HUMAN Isoform of P60033, Tetraspanin OS=Homo sapiens (Human) OX=9606 GN=CD81 PE=1 SV=1;>tr|E9PJK1|E9PJK1_HUMAN Isoform of P60033, Tetraspanin OS=Homo sapiens (Human) OX=9606 GN=CD81 PE=1 SV=1;>tr|E9PRJ8|E9PRJ8_HUMAN Isoform of P60033, Tetraspanin (Fragment) OS=Homo sapiens (H…	CD81	1.5842	0.0198004	Yes	0.0435392	Yes	2.05227
Q9Y697;Q9Y697-2	>sp|Q9Y697|NFS1_HUMAN Cysteine desulfurase, mitochondrial OS=Homo sapiens (Human) OX=9606 GN=NFS1 PE=1 SV=3;>sp|Q9Y697-2|NFS1-2_HUMAN Isoform of Q9Y697, Isoform Cytoplasmic of Cysteine desulfurase, mitochondrial OS=Homo sapiens (Human) OX=9606 GN=NFS1 PE=1 SV=3	NFS1	0.754106	0.0199829	Yes	0.0438593	Yes	-2.04918
A0A087X1G1;C9IZN5;F8WAS3;H7BYD0;Q16718;Q16718-2	>tr|A0A087X1G1|A0A087X1G1_HUMAN Isoform of Q16718, NADH dehydrogenase [ubiquinone] 1 alpha subcomplex subunit 5 OS=Homo sapiens (Human) OX=9606 GN=NDUFA5 PE=1 SV=1;>tr|C9IZN5|C9IZN5_HUMAN Isoform of Q16718, NADH dehydrogenase [ubiquinone] 1 alpha subcomplex subunit 5 (Fragment) OS=Homo sapiens (Human) OX=9606 GN=NDUFA5 PE=1 SV=1;>tr|F8WAS3|F8WAS3_HUMAN Isoform of Q16718, NADH dehydrogenase [ubiqu…	NDUFA5	0.756548	0.0202083	Yes	0.0442722	Yes	-2.04529
Q9UKU7;Q9UKU7-2	>sp|Q9UKU7|ACAD8_HUMAN Isobutyryl-CoA dehydrogenase, mitochondrial OS=Homo sapiens (Human) OX=9606 GN=ACAD8 PE=1 SV=1;>sp|Q9UKU7-2|ACAD8-2_HUMAN Isoform of Q9UKU7, Isoform 2 of Isobutyryl-CoA dehydrogenase, mitochondrial OS=Homo sapiens (Human) OX=9606 GN=ACAD8 PE=1 SV=1	ACAD8	1.68831	0.0207412	Yes	0.0453254	Yes	2.03597
P30044;P30044-2	>sp|P30044|PRDX5_HUMAN Peroxiredoxin-5, mitochondrial OS=Homo sapiens (Human) OX=9606 GN=PRDX5 PE=1 SV=4;>sp|P30044-2|PRDX5-2_HUMAN Isoform of P30044, Isoform Cytoplasmic+peroxisomal of Peroxiredoxin-5, mitochondrial OS=Homo sapiens (Human) OX=9606 GN=PRDX5 PE=1 SV=4	PRDX5	1.60605	0.0207654	Yes	0.0453254	Yes	2.0354
O95292	>sp|O95292|VAPB_HUMAN Vesicle-associated membrane protein-associated protein B/C OS=Homo sapiens (Human) OX=9606 GN=VAPB PE=1 SV=3	VAPB	0.714842	0.0209083	Yes	0.0455536	Yes	-2.03247
Q9Y2S2;Q9Y2S2-2	>sp|Q9Y2S2|CRYL1_HUMAN Lambda-crystallin homolog OS=Homo sapiens (Human) OX=9606 GN=CRYL1 PE=1 SV=3;>sp|Q9Y2S2-2|CRYL1-2_HUMAN Isoform of Q9Y2S2, Isoform 2 of Lambda-crystallin homolog OS=Homo sapiens (Human) OX=9606 GN=CRYL1 PE=1 SV=3	CRYL1	1.418	0.0209617	Yes	0.0455862	Yes	2.0316
Q9HD34	>sp|Q9HD34|LYRM4_HUMAN LYR motif-containing protein 4 OS=Homo sapiens (Human) OX=9606 GN=LYRM4 PE=1 SV=1	LYRM4	0.562606	0.0210608	Yes	0.0457181	Yes	-2.02985
E9PC15;Q53H12	>tr|E9PC15|E9PC15_HUMAN Isoform of Q53H12, DAGKc domain-containing protein OS=Homo sapiens (Human) OX=9606 GN=AGK PE=1 SV=1;>sp|Q53H12|AGK_HUMAN Acylglycerol kinase, mitochondrial OS=Homo sapiens (Human) OX=9606 GN=AGK PE=1 SV=2	AGK	0.785428	0.0211321	Yes	0.0457733	Yes	-2.02855
Q6YN16	>sp|Q6YN16|HSDL2_HUMAN Hydroxysteroid dehydrogenase-like protein 2 OS=Homo sapiens (Human) OX=9606 GN=HSDL2 PE=1 SV=1	HSDL2	1.41934	0.0211633	Yes	0.0457733	Yes	2.02795
Q5T6V5	>sp|Q5T6V5|QSPP_HUMAN Queuosine salvage protein OS=Homo sapiens (Human) OX=9606 GN=C9orf64 PE=1 SV=1	C9ORF64	1.3836	0.0213346	Yes	0.0460598	Yes	2.02489
Q16537;Q16537-2	>sp|Q16537|2A5E_HUMAN Serine/threonine-protein phosphatase 2A 56 kDa regulatory subunit epsilon isoform OS=Homo sapiens (Human) OX=9606 GN=PPP2R5E PE=1 SV=1;>sp|Q16537-2|2A5E-2_HUMAN Isoform of Q16537, Isoform 2 of Serine/threonine-protein phosphatase 2A 56 kDa regulatory subunit epsilon isoform OS=Homo sapiens (Human) OX=9606 GN=PPP2R5E PE=1 SV=1	PPP2R5E	0.784113	0.0214325	Yes	0.0461872	Yes	-2.02333
B0YIW6;P48444	>tr|B0YIW6|B0YIW6_HUMAN Isoform of P48444, Coatomer subunit delta OS=Homo sapiens (Human) OX=9606 GN=ARCN1 PE=1 SV=1;>sp|P48444|COPD_HUMAN Coatomer subunit delta OS=Homo sapiens (Human) OX=9606 GN=ARCN1 PE=1 SV=1	ARCN1	0.748216	0.0215654	Yes	0.046222	Yes	-2.02097
Q00765	>sp|Q00765|REEP5_HUMAN Receptor expression-enhancing protein 5 OS=Homo sapiens (Human) OX=9606 GN=REEP5 PE=1 SV=3	REEP5	0.724824	0.0215379	Yes	0.046222	Yes	-2.02148
Q9Y277-2	>sp|Q9Y277-2|VDAC3-2_HUMAN Isoform of Q9Y277, Isoform 2 of Voltage-dependent anion-selective channel protein 3 OS=Homo sapiens (Human) OX=9606 GN=VDAC3 PE=1 SV=1	VDAC3	0.829201	0.0215521	Yes	0.046222	Yes	-2.02125
Q9UBQ7	>sp|Q9UBQ7|GRHPR_HUMAN Glyoxylate reductase/hydroxypyruvate reductase OS=Homo sapiens (Human) OX=9606 GN=GRHPR PE=1 SV=1	GRHPR	1.5618	0.0218354	Yes	0.0467163	Yes	2.01594
P19784	>sp|P19784|CSK22_HUMAN Casein kinase II subunit alpha' OS=Homo sapiens (Human) OX=9606 GN=CSNK2A2 PE=1 SV=1	CSNK2A2	1.44831	0.0219333	Yes	0.0468414	Yes	2.01433
Q9NV96;Q9NV96-2	>sp|Q9NV96|CC50A_HUMAN Cell cycle control protein 50A OS=Homo sapiens (Human) OX=9606 GN=TMEM30A PE=1 SV=1;>sp|Q9NV96-2|CC50A-2_HUMAN Isoform of Q9NV96, Isoform 2 of Cell cycle control protein 50A OS=Homo sapiens (Human) OX=9606 GN=TMEM30A PE=1 SV=1	TMEM30A	1.31001	0.0220358	Yes	0.0469758	Yes	2.01258
Q99726	>sp|Q99726|ZNT3_HUMAN Zinc transporter 3 OS=Homo sapiens (Human) OX=9606 GN=SLC30A3 PE=1 SV=2	SLC30A3	0.641342	0.0221996	Yes	0.0472401	Yes	-2.00954
Q8IYB4;Q8IYB4-2;Q8IYB4-3;Q8IYB4-4;Q8IYB4-5;Q8IYB4-	NA	PEX5L	0.724673	0.0223171	Yes	0.0474052	Yes	-2.00759
P24539	>sp|P24539|AT5F1_HUMAN ATP synthase F(0) complex subunit B1, mitochondrial OS=Homo sapiens (Human) OX=9606 GN=ATP5PB PE=1 SV=2	ATP5PB	0.808951	0.0224633	Yes	0.0475457	Yes	-2.00507
Q96NT1	>sp|Q96NT1|NP1L5_HUMAN Nucleosome assembly protein 1-like 5 OS=Homo sapiens (Human) OX=9606 GN=NAP1L5 PE=1 SV=1	NAP1L5	0.419022	0.0224296	Yes	0.0475457	Yes	-2.00577
P19022;P19022-2	>sp|P19022|CADH2_HUMAN Cadherin-2 OS=Homo sapiens (Human) OX=9606 GN=CDH2 PE=1 SV=4;>sp|P19022-2|CADH2-2_HUMAN Isoform of P19022, Isoform 2 of Cadherin-2 OS=Homo sapiens (Human) OX=9606 GN=CDH2 PE=1 SV=4	CDH2	1.39585	0.0226521	Yes	0.0476084	Yes	2.0018
Q5JUW8;Q92796	>tr|Q5JUW8|Q5JUW8_HUMAN Isoform of Q92796, Discs, large homolog 3 (Neuroendocrine-dlg, Drosophila), isoform CRA_b OS=Homo sapiens (Human) OX=9606 GN=DLG3 PE=1 SV=1;>sp|Q92796|DLG3_HUMAN Disks large homolog 3 OS=Homo sapiens (Human) OX=9606 GN=DLG3 PE=1 SV=2	DLG3	0.775564	0.022625	Yes	0.0476084	Yes	-2.00221
Q9BUL8	>sp|Q9BUL8|PDC10_HUMAN Programmed cell death protein 10 OS=Homo sapiens (Human) OX=9606 GN=PDCD10 PE=1 SV=1	PDCD10	0.813035	0.0226533	Yes	0.0476084	Yes	-2.00178
Q9UI40-2	>sp|Q9UI40-2|NCKX2-2_HUMAN Isoform of Q9UI40, Isoform 2 of Sodium/potassium/calcium exchanger 2 OS=Homo sapiens (Human) OX=9606 GN=SLC24A2 PE=1 SV=1	SLC24A2	0.758855	0.0226158	Yes	0.0476084	Yes	-2.00239
O95970	>sp|O95970|LGI1_HUMAN Leucine-rich glioma-inactivated protein 1 OS=Homo sapiens (Human) OX=9606 GN=LGI1 PE=1 SV=1	LGI1	0.711798	0.0228396	Yes	0.0479151	Yes	-1.99831
Q7Z406;Q7Z406-2;Q7Z406-6	>sp|Q7Z406|MYH14_HUMAN Myosin-14 OS=Homo sapiens (Human) OX=9606 GN=MYH14 PE=1 SV=2;>sp|Q7Z406-2|MYH14-2_HUMAN Isoform of Q7Z406, Isoform 2 of Myosin-14 OS=Homo sapiens (Human) OX=9606 GN=MYH14 PE=1 SV=2;>sp|Q7Z406-6|MYH14-6_HUMAN Isoform of Q7Z406, Isoform 6 of Myosin-14 OS=Homo sapiens (Human) OX=9606 GN=MYH14 PE=1 SV=2	MYH14	1.4316	0.0228821	Yes	0.0479196	Yes	1.99759
P62899	>sp|P62899|RL31_HUMAN 60S ribosomal protein L31 OS=Homo sapiens (Human) OX=9606 GN=RPL31 PE=1 SV=1	RPL31	1.38375	0.0229337	Yes	0.0479432	Yes	1.99661
Q12860;Q12860-2	>sp|Q12860|CNTN1_HUMAN Contactin-1 OS=Homo sapiens (Human) OX=9606 GN=CNTN1 PE=1 SV=1;>sp|Q12860-2|CNTN1-2_HUMAN Isoform of Q12860, Isoform 2 of Contactin-1 OS=Homo sapiens (Human) OX=9606 GN=CNTN1 PE=1 SV=1	CNTN1	1.25446	0.0231971	Yes	0.0482389	Yes	1.99236
Q9GZY8-2	>sp|Q9GZY8-2|MFF-2_HUMAN Isoform of Q9GZY8, Isoform 2 of Mitochondrial fission factor OS=Homo sapiens (Human) OX=9606 GN=MFF PE=1 SV=1	MFF	0.76331	0.0231946	Yes	0.0482389	Yes	-1.99241
Q6SZW1;Q6SZW1-2	>sp|Q6SZW1|SARM1_HUMAN Sterile alpha and TIR motif-containing protein 1 OS=Homo sapiens (Human) OX=9606 GN=SARM1 PE=1 SV=1;>sp|Q6SZW1-2|SARM1-2_HUMAN Isoform of Q6SZW1, Isoform 2 of Sterile alpha and TIR motif-containing protein 1 OS=Homo sapiens (Human) OX=9606 GN=SARM1 PE=1 SV=1	SARM1	0.521743	0.0231621	Yes	0.0482389	Yes	-1.99294
C9J2C0;Q9NY65	>tr|C9J2C0|C9J2C0_HUMAN Isoform of Q9NY65, Tubulin alpha chain (Fragment) OS=Homo sapiens (Human) OX=9606 GN=TUBA8 PE=1 SV=1;>sp|Q9NY65|TBA8_HUMAN Tubulin alpha-8 chain OS=Homo sapiens (Human) OX=9606 GN=TUBA8 PE=1 SV=1	TUBA8	0.781801	0.0235296	Yes	0.0488448	Yes	-1.98694
E7EP65;E7EW77;F8WAL6;Q9NYB9;Q9NYB9-2;Q9NYB9-4	>tr|E7EP65|E7EP65_HUMAN Isoform of Q9NYB9, Abl interactor 2 (Fragment) OS=Homo sapiens (Human) OX=9606 GN=ABI2 PE=1 SV=1;>tr|E7EW77|E7EW77_HUMAN Isoform of Q9NYB9, Abl interactor 2 OS=Homo sapiens (Human) OX=9606 GN=ABI2 PE=1 SV=1;>tr|F8WAL6|F8WAL6_HUMAN Isoform of Q9NYB9, Abl interactor 2 OS=Homo sapiens (Human) OX=9606 GN=ABI2 PE=1 SV=2;>sp|Q9NYB9|ABI2_HUMAN Abl interactor 2 OS=Homo sapiens (Hu…	ABI2	0.785713	0.0236896	Yes	0.0490116	Yes	-1.98446
A0A0A0MSA7;O43432;O43432-3;O43432-4	>tr|A0A0A0MSA7|A0A0A0MSA7_HUMAN Isoform of O43432, Eukaryotic translation initiation factor 4 gamma 3 OS=Homo sapiens (Human) OX=9606 GN=EIF4G3 PE=1 SV=1;>sp|O43432|IF4G3_HUMAN Eukaryotic translation initiation factor 4 gamma 3 OS=Homo sapiens (Human) OX=9606 GN=EIF4G3 PE=1 SV=2;>sp|O43432-3|IF4G3-3_HUMAN Isoform of O43432, Isoform 3 of Eukaryotic translation initiation factor 4 gamma 3 OS=Homo s…	EIF4G3	0.447423	0.0236925	Yes	0.0490116	Yes	-1.98442
Q13813-2	>sp|Q13813-2|SPTN1-2_HUMAN Isoform of Q13813, Isoform 2 of Spectrin alpha chain, non-erythrocytic 1 OS=Homo sapiens (Human) OX=9606 GN=SPTAN1 PE=1 SV=3	SPTAN1	1.22119	0.0237412	Yes	0.0490271	Yes	1.98353
P68871	>sp|P68871|HBB_HUMAN Hemoglobin subunit beta OS=Homo sapiens (Human) OX=9606 GN=HBB PE=1 SV=2	HBB	1.3565	0.0238775	Yes	0.0492228	Yes	1.98141
P18669	>sp|P18669|PGAM1_HUMAN Phosphoglycerate mutase 1 OS=Homo sapiens (Human) OX=9606 GN=PGAM1 PE=1 SV=2	PGAM1	1.89475	0.0239912	Yes	0.0492862	Yes	1.97954
O43592	>sp|O43592|XPOT_HUMAN Exportin-T OS=Homo sapiens (Human) OX=9606 GN=XPOT PE=1 SV=2	XPOT	1.38187	0.0239771	Yes	0.0492862	Yes	1.97973
C9JNW5;C9JXB8;P83731	>tr|C9JNW5|C9JNW5_HUMAN Isoform of P83731, TRASH domain-containing protein OS=Homo sapiens (Human) OX=9606 GN=RPL24 PE=1 SV=1;>tr|C9JXB8|C9JXB8_HUMAN Isoform of P83731, TRASH domain-containing protein OS=Homo sapiens (Human) OX=9606 GN=RPL24 PE=1 SV=1;>sp|P83731|RL24_HUMAN 60S ribosomal protein L24 OS=Homo sapiens (Human) OX=9606 GN=RPL24 PE=1 SV=1	RPL24	1.31468	0.02427	Yes	0.0497727	Yes	1.97532
P01019	>sp|P01019|ANGT_HUMAN Angiotensinogen OS=Homo sapiens (Human) OX=9606 GN=AGT PE=1 SV=1	AGT	1.38145	0.0246962	Yes	0.05051	No	1.96856
Q9Y2Q0;Q9Y2Q0-2;Q9Y2Q0-3	>sp|Q9Y2Q0|AT8A1_HUMAN Phospholipid-transporting ATPase IA OS=Homo sapiens (Human) OX=9606 GN=ATP8A1 PE=1 SV=1;>sp|Q9Y2Q0-2|AT8A1-2_HUMAN Isoform of Q9Y2Q0, Isoform 2 of Phospholipid-transporting ATPase IA OS=Homo sapiens (Human) OX=9606 GN=ATP8A1 PE=1 SV=1;>sp|Q9Y2Q0-3|AT8A1-3_HUMAN Isoform of Q9Y2Q0, Isoform 3 of Phospholipid-transporting ATPase IA OS=Homo sapiens (Human) OX=9606 GN=ATP8A1 PE=1…	ATP8A1	1.3844	0.0247146	Yes	0.05051	No	1.96826
D6R9S8;D6RA76;D6RC11;D6RCE6;D6RCR8;D6RDI6;D6RDP6;D	NA	CLDND1	0.66637	0.0247587	Yes	0.0505133	No	-1.96745
P21281	>sp|P21281|VATB2_HUMAN V-type proton ATPase subunit B, brain isoform OS=Homo sapiens (Human) OX=9606 GN=ATP6V1B2 PE=1 SV=3	ATP6V1B2	0.830126	0.0253263	Yes	0.051349	No	-1.95888
A0A087X082;G3V153;Q14444;Q14444-2	>tr|A0A087X082|A0A087X082_HUMAN Caprin-1 OS=Homo sapiens GN=CAPRIN1 PE=1 SV=1;>tr|G3V153|G3V153_HUMAN Isoform of Q14444, Caprin-1 OS=Homo sapiens (Human) OX=9606 GN=CAPRIN1 PE=1 SV=1;>sp|Q14444|CAPR1_HUMAN Caprin-1 OS=Homo sapiens (Human) OX=9606 GN=CAPRIN1 PE=1 SV=2;>sp|Q14444-2|CAPR1-2_HUMAN Isoform of Q14444, Isoform 2 of Caprin-1 OS=Homo sapiens (Human) OX=9606 GN=CAPRIN1 PE=1 SV=2	CAPRIN1	0.743636	0.0253263	Yes	0.051349	No	-1.95889
Q15126	>sp|Q15126|PMVK_HUMAN Phosphomevalonate kinase OS=Homo sapiens (Human) OX=9606 GN=PMVK PE=1 SV=3	PMVK	1.41441	0.0253846	Yes	0.051349	No	1.95804
Q9H1E5	>sp|Q9H1E5|TMX4_HUMAN Thioredoxin-related transmembrane protein 4 OS=Homo sapiens (Human) OX=9606 GN=TMX4 PE=1 SV=1	TMX4	0.758149	0.0253646	Yes	0.051349	No	-1.9584
Q969M1;Q969M1-2	>sp|Q969M1|TM40L_HUMAN Mitochondrial import receptor subunit TOM40B OS=Homo sapiens (Human) OX=9606 GN=TOMM40L PE=1 SV=1;>sp|Q969M1-2|TM40L-2_HUMAN Isoform of Q969M1, Isoform 2 of Mitochondrial import receptor subunit TOM40B OS=Homo sapiens (Human) OX=9606 GN=TOMM40L PE=1 SV=1	TOMM40L	0.665041	0.0252758	Yes	0.051349	No	-1.95967
A0A087X1P3;C9IYE1;F8W8P5;Q86UW7	>tr|A0A087X1P3|A0A087X1P3_HUMAN Isoform of Q86UW7, Calcium-dependent secretion activator 2 OS=Homo sapiens (Human) OX=9606 GN=CADPS2 PE=1 SV=1;>tr|C9IYE1|C9IYE1_HUMAN Isoform of Q86UW7, Calcium-dependent secretion activator 2 OS=Homo sapiens (Human) OX=9606 GN=CADPS2 PE=1 SV=1;>tr|F8W8P5|F8W8P5_HUMAN Isoform of Q86UW7, Calcium-dependent secretion activator 2 OS=Homo sapiens (Human) OX=9606 GN=CAD…	CADPS2	0.689372	0.0254788	Yes	0.0514519	No	-1.95657
Q92752	>sp|Q92752|TENR_HUMAN Tenascin-R OS=Homo sapiens (Human) OX=9606 GN=TNR PE=1 SV=3	TNR	1.31136	0.0257575	Yes	0.0519265	No	1.95245
P12814-3	>sp|P12814-3|ACTN1-3_HUMAN Isoform of P12814, Isoform 3 of Alpha-actinin-1 OS=Homo sapiens (Human) OX=9606 GN=ACTN1 PE=1 SV=2	ACTN1	0.802996	0.0262313	Yes	0.0527919	No	-1.94563
Q02978	>sp|Q02978|M2OM_HUMAN Mitochondrial 2-oxoglutarate/malate carrier protein OS=Homo sapiens (Human) OX=9606 GN=SLC25A11 PE=1 SV=3	SLC25A11	0.749092	0.0263408	Yes	0.0529227	No	-1.94399
O00232	>sp|O00232|PSD12_HUMAN 26S proteasome non-ATPase regulatory subunit 12 OS=Homo sapiens (Human) OX=9606 GN=PSMD12 PE=1 SV=3	PSMD12	0.755606	0.0265504	Yes	0.0532537	No	-1.94106
C9IYV2;Q96NX5;Q96NX5-2	>tr|C9IYV2|C9IYV2_HUMAN Isoform of Q96NX5, Protein kinase domain-containing protein (Fragment) OS=Homo sapiens (Human) OX=9606 GN=CAMK1G PE=1 SV=1;>sp|Q96NX5|KCC1G_HUMAN Calcium/calmodulin-dependent protein kinase type 1G OS=Homo sapiens (Human) OX=9606 GN=CAMK1G PE=1 SV=3;>sp|Q96NX5-2|KCC1G-2_HUMAN Isoform of Q96NX5, Isoform 2 of Calcium/calmodulin-dependent protein kinase type 1G OS=Homo sapien…	CAMK1G	0.558992	0.0266204	Yes	0.0533041	No	-1.94002
P78324	>sp|P78324|SHPS1_HUMAN Tyrosine-protein phosphatase non-receptor type substrate 1 OS=Homo sapiens (Human) OX=9606 GN=SIRPA PE=1 SV=2	SIRPA	0.777234	0.0269067	Yes	0.0537866	No	-1.93598
Q8N6D5;Q8N6D5-3	>sp|Q8N6D5|ANR29_HUMAN Ankyrin repeat domain-containing protein 29 OS=Homo sapiens (Human) OX=9606 GN=ANKRD29 PE=2 SV=2;>sp|Q8N6D5-3|ANR29-3_HUMAN Isoform of Q8N6D5, Isoform 3 of Ankyrin repeat domain-containing protein 29 OS=Homo sapiens (Human) OX=9606 GN=ANKRD29 PE=2 SV=2	ANKRD29	0.628722	0.0273613	Yes	0.0544287	No	-1.92944
P02545;P02545-2;P02545-6	>sp|P02545|LMNA_HUMAN Prelamin-A/C OS=Homo sapiens (Human) OX=9606 GN=LMNA PE=1 SV=1;>sp|P02545-2|LMNA-2_HUMAN Isoform of P02545, Isoform C of Prelamin-A/C OS=Homo sapiens (Human) OX=9606 GN=LMNA PE=1 SV=1;>sp|P02545-6|LMNA-6_HUMAN Isoform of P02545, Isoform 6 of Prelamin-A/C OS=Homo sapiens (Human) OX=9606 GN=LMNA PE=1 SV=1	LMNA	1.49936	0.0273079	Yes	0.0544287	No	1.9303
H3BN27;Q9Y342	>tr|H3BN27|H3BN27_HUMAN Isoform of Q9Y342, Plasmolipin OS=Homo sapiens (Human) OX=9606 GN=PLLP PE=1 SV=1;>sp|Q9Y342|PLLP_HUMAN Plasmolipin OS=Homo sapiens (Human) OX=9606 GN=PLLP PE=1 SV=1	PLLP	0.553461	0.0273654	Yes	0.0544287	No	-1.9294
Q9UK22	>sp|Q9UK22|FBX2_HUMAN F-box only protein 2 OS=Homo sapiens (Human) OX=9606 GN=FBXO2 PE=1 SV=2	FBXO2	1.66912	0.0274533	Yes	0.0545123	No	1.92821
E7ENL6;P12111;P12111-2;P12111-4	>tr|E7ENL6|E7ENL6_HUMAN Isoform of P12111, Collagen alpha-3(VI) chain OS=Homo sapiens (Human) OX=9606 GN=COL6A3 PE=1 SV=2;>sp|P12111|CO6A3_HUMAN Collagen alpha-3(VI) chain OS=Homo sapiens (Human) OX=9606 GN=COL6A3 PE=1 SV=5;>sp|P12111-2|CO6A3-2_HUMAN Isoform of P12111, Isoform 2 of Collagen alpha-3(VI) chain OS=Homo sapiens (Human) OX=9606 GN=COL6A3 PE=1 SV=5;>sp|P12111-4|CO6A3-4_HUMAN Isoform of…	COL6A3	1.81702	0.0275692	Yes	0.054632	No	1.92668
P19525;P19525-2	>sp|P19525|E2AK2_HUMAN Interferon-induced, double-stranded RNA-activated protein kinase OS=Homo sapiens (Human) OX=9606 GN=EIF2AK2 PE=1 SV=2;>sp|P19525-2|E2AK2-2_HUMAN Isoform of P19525, Isoform 2 of Interferon-induced, double-stranded RNA-activated protein kinase OS=Homo sapiens (Human) OX=9606 GN=EIF2AK2 PE=1 SV=2	EIF2AK2	0.655076	0.0276517	Yes	0.054632	No	-1.92545
P04271	>sp|P04271|S100B_HUMAN Protein S100-B OS=Homo sapiens (Human) OX=9606 GN=S100B PE=1 SV=2	S100B	1.97645	0.0276288	Yes	0.054632	No	1.92582
F8VXU5;Q9UBQ0;Q9UBQ0-2	>tr|F8VXU5|F8VXU5_HUMAN Isoform of Q9UBQ0, Vacuolar protein sorting-associated protein 29 OS=Homo sapiens (Human) OX=9606 GN=VPS29 PE=1 SV=1;>sp|Q9UBQ0|VPS29_HUMAN Vacuolar protein sorting-associated protein 29 OS=Homo sapiens (Human) OX=9606 GN=VPS29 PE=1 SV=1;>sp|Q9UBQ0-2|VPS29-2_HUMAN Isoform of Q9UBQ0, Isoform 2 of Vacuolar protein sorting-associated protein 29 OS=Homo sapiens (Human) OX=9606…	VPS29	2.52568	0.0277487	Yes	0.0547327	No	1.92406
Q9NZH0;Q9NZH0-2	>sp|Q9NZH0|GPC5B_HUMAN G-protein coupled receptor family C group 5 member B OS=Homo sapiens (Human) OX=9606 GN=GPRC5B PE=2 SV=2;>sp|Q9NZH0-2|GPC5B-2_HUMAN Isoform of Q9NZH0, Isoform 2 of G-protein coupled receptor family C group 5 member B OS=Homo sapiens (Human) OX=9606 GN=GPRC5B PE=2 SV=2	GPRC5B	1.78496	0.0278492	Yes	0.0548397	No	1.9228
Q9UHC6	>sp|Q9UHC6|CNTP2_HUMAN Contactin-associated protein-like 2 OS=Homo sapiens (Human) OX=9606 GN=CNTNAP2 PE=1 SV=1	CNTNAP2	0.801138	0.0279875	Yes	0.0549299	No	-1.92102
P14543;P14543-2	>sp|P14543|NID1_HUMAN Nidogen-1 OS=Homo sapiens (Human) OX=9606 GN=NID1 PE=1 SV=3;>sp|P14543-2|NID1-2_HUMAN Isoform of P14543, Isoform 2 of Nidogen-1 OS=Homo sapiens (Human) OX=9606 GN=NID1 PE=1 SV=3	NID1	1.36907	0.0279417	Yes	0.0549299	No	1.92161
P13716	>sp|P13716|HEM2_HUMAN Delta-aminolevulinic acid dehydratase OS=Homo sapiens (Human) OX=9606 GN=ALAD PE=1 SV=1	ALAD	1.51264	0.028165	Yes	0.0551871	No	1.91867
J3KNF4;O14618	>tr|J3KNF4|J3KNF4_HUMAN Isoform of O14618, HMA domain-containing protein OS=Homo sapiens (Human) OX=9606 GN=CCS PE=1 SV=1;>sp|O14618|CCS_HUMAN Copper chaperone for superoxide dismutase OS=Homo sapiens (Human) OX=9606 GN=CCS PE=1 SV=1	CCS	1.4627	0.0282867	Yes	0.0553342	No	1.9171
E7EPT4;P19404	>tr|E7EPT4|E7EPT4_HUMAN Isoform of P19404, NADH dehydrogenase [ubiquinone] flavoprotein 2, mitochondrial OS=Homo sapiens (Human) OX=9606 GN=NDUFV2 PE=1 SV=1;>sp|P19404|NDUV2_HUMAN NADH dehydrogenase [ubiquinone] flavoprotein 2, mitochondrial OS=Homo sapiens (Human) OX=9606 GN=NDUFV2 PE=1 SV=2	NDUFV2	0.735228	0.0287787	Yes	0.0562042	No	-1.91048
O60220	>sp|O60220|TIM8A_HUMAN Mitochondrial import inner membrane translocase subunit Tim8 A OS=Homo sapiens (Human) OX=9606 GN=TIMM8A PE=1 SV=1	TIMM8A	0.495579	0.0288954	Yes	0.0563394	No	-1.90889
Q9UQB3;Q9UQB3-2	>sp|Q9UQB3|CTND2_HUMAN Catenin delta-2 OS=Homo sapiens (Human) OX=9606 GN=CTNND2 PE=1 SV=3;>sp|Q9UQB3-2|CTND2-2_HUMAN Isoform of Q9UQB3, Isoform 2 of Catenin delta-2 OS=Homo sapiens (Human) OX=9606 GN=CTNND2 PE=1 SV=3	CTNND2	1.21055	0.0290863	Yes	0.0564334	No	1.90654
O75251	>sp|O75251|NDUS7_HUMAN NADH dehydrogenase [ubiquinone] iron-sulfur protein 7, mitochondrial OS=Homo sapiens (Human) OX=9606 GN=NDUFS7 PE=1 SV=3	NDUFS7	0.718672	0.0290588	Yes	0.0564334	No	-1.90692
Q99961	>sp|Q99961|SH3G1_HUMAN Endophilin-A2 OS=Homo sapiens (Human) OX=9606 GN=SH3GL1 PE=1 SV=1	SH3GL1	0.791481	0.0290308	Yes	0.0564334	No	-1.90729
Q13561;Q13561-2;Q13561-3	>sp|Q13561|DCTN2_HUMAN Dynactin subunit 2 OS=Homo sapiens (Human) OX=9606 GN=DCTN2 PE=1 SV=4;>sp|Q13561-2|DCTN2-2_HUMAN Isoform of Q13561, Isoform 2 of Dynactin subunit 2 OS=Homo sapiens (Human) OX=9606 GN=DCTN2 PE=1 SV=4;>sp|Q13561-3|DCTN2-3_HUMAN Isoform of Q13561, Isoform 3 of Dynactin subunit 2 OS=Homo sapiens (Human) OX=9606 GN=DCTN2 PE=1 SV=4	DCTN2	0.801265	0.0292271	Yes	0.0566142	No	-1.90489
Q9H3P7	>sp|Q9H3P7|GCP60_HUMAN Golgi resident protein GCP60 OS=Homo sapiens (Human) OX=9606 GN=ACBD3 PE=1 SV=4	ACBD3	0.389617	0.0294125	Yes	0.0566959	No	-1.90247
Q99570	>sp|Q99570|PI3R4_HUMAN Phosphoinositide 3-kinase regulatory subunit 4 OS=Homo sapiens (Human) OX=9606 GN=PIK3R4 PE=1 SV=3	PIK3R4	0.692272	0.0293996	Yes	0.0566959	No	-1.90264
O75746	>sp|O75746|CMC1_HUMAN Calcium-binding mitochondrial carrier protein Aralar1 OS=Homo sapiens (Human) OX=9606 GN=SLC25A12 PE=1 SV=2	SLC25A12	0.783946	0.0293429	Yes	0.0566959	No	-1.90347
P41594;P41594-2;P41594-3	>sp|P41594|GRM5_HUMAN Metabotropic glutamate receptor 5 OS=Homo sapiens (Human) OX=9606 GN=GRM5 PE=1 SV=2;>sp|P41594-2|GRM5-2_HUMAN Isoform of P41594, Isoform 1 of Metabotropic glutamate receptor 5 OS=Homo sapiens (Human) OX=9606 GN=GRM5 PE=1 SV=2;>sp|P41594-3|GRM5-3_HUMAN Isoform of P41594, Isoform 3 of Metabotropic glutamate receptor 5 OS=Homo sapiens (Human) OX=9606 GN=GRM5 PE=1 SV=2	GRM5	1.59539	0.0295762	Yes	0.0569191	No	1.90029
Q8NBU5	>sp|Q8NBU5|ATAD1_HUMAN ATPase family AAA domain-containing protein 1 OS=Homo sapiens (Human) OX=9606 GN=ATAD1 PE=1 SV=1	ATAD1	0.68049	0.0298071	Yes	0.0571631	No	-1.89737
P27544;P27544-2	>sp|P27544|CERS1_HUMAN Ceramide synthase 1 OS=Homo sapiens (Human) OX=9606 GN=CERS1 PE=1 SV=1;>sp|P27544-2|CERS1-2_HUMAN Isoform of P27544, Isoform 2 of Ceramide synthase 1 OS=Homo sapiens (Human) OX=9606 GN=CERS1 PE=1 SV=1	CERS1	2.02283	0.0298496	Yes	0.0571631	No	1.89681
A0A087X0S5;P12109	>tr|A0A087X0S5|A0A087X0S5_HUMAN Isoform of P12109, Collagen alpha-1(VI) chain OS=Homo sapiens (Human) OX=9606 GN=COL6A1 PE=1 SV=1;>sp|P12109|CO6A1_HUMAN Collagen alpha-1(VI) chain OS=Homo sapiens (Human) OX=9606 GN=COL6A1 PE=1 SV=3	COL6A1	1.61516	0.0297946	Yes	0.0571631	No	1.89752
Q9BSJ8;Q9BSJ8-2	>sp|Q9BSJ8|ESYT1_HUMAN Extended synaptotagmin-1 OS=Homo sapiens (Human) OX=9606 GN=ESYT1 PE=1 SV=1;>sp|Q9BSJ8-2|ESYT1-2_HUMAN Isoform of Q9BSJ8, Isoform 2 of Extended synaptotagmin-1 OS=Homo sapiens (Human) OX=9606 GN=ESYT1 PE=1 SV=1	ESYT1	0.810747	0.03004	Yes	0.0571631	No	-1.89419
P43490	>sp|P43490|NAMPT_HUMAN Nicotinamide phosphoribosyltransferase OS=Homo sapiens (Human) OX=9606 GN=NAMPT PE=1 SV=1	NAMPT	1.37902	0.0299754	Yes	0.0571631	No	1.89509
P55011;P55011-3	>sp|P55011|S12A2_HUMAN Solute carrier family 12 member 2 OS=Homo sapiens (Human) OX=9606 GN=SLC12A2 PE=1 SV=1;>sp|P55011-3|S12A2-3_HUMAN Isoform of P55011, Isoform 2 of Solute carrier family 12 member 2 OS=Homo sapiens (Human) OX=9606 GN=SLC12A2 PE=1 SV=1	SLC12A2	0.794996	0.0299925	Yes	0.0571631	No	-1.89481
F8WD64;Q69YW2	>tr|F8WD64|F8WD64_HUMAN Isoform of Q69YW2, Protein stum homolog OS=Homo sapiens (Human) OX=9606 GN=STUM PE=1 SV=1;>sp|Q69YW2|STUM_HUMAN Protein stum homolog OS=Homo sapiens (Human) OX=9606 GN=STUM PE=2 SV=1	STUM	1.95918	0.0300013	Yes	0.0571631	No	1.89472
M0R2G0;Q9NT99	>tr|M0R2G0|M0R2G0_HUMAN Isoform of Q9NT99, LRRNT domain-containing protein (Fragment) OS=Homo sapiens (Human) OX=9606 GN=LRRC4B PE=1 SV=1;>sp|Q9NT99|LRC4B_HUMAN Leucine-rich repeat-containing protein 4B OS=Homo sapiens (Human) OX=9606 GN=LRRC4B PE=2 SV=3	LRRC4B	0.659409	0.0301983	Yes	0.0573724	No	-1.89216
P46108	>sp|P46108|CRK_HUMAN Adapter molecule crk OS=Homo sapiens (Human) OX=9606 GN=CRK PE=1 SV=2	CRK	1.63561	0.0307246	Yes	0.058186	No	1.88546
Q9Y6R0	>sp|Q9Y6R0|NUMBL_HUMAN Numb-like protein OS=Homo sapiens (Human) OX=9606 GN=NUMBL PE=1 SV=1	NUMBL	0.666263	0.0307238	Yes	0.058186	No	-1.88547
Q4G0N4	>sp|Q4G0N4|NAKD2_HUMAN NAD kinase 2, mitochondrial OS=Homo sapiens (Human) OX=9606 GN=NADK2 PE=1 SV=2	NADK2	1.61029	0.0308404	Yes	0.0583124	No	1.88383
Q14982;Q14982-2;Q14982-3;Q14982-4	>sp|Q14982|OPCM_HUMAN Opioid-binding protein/cell adhesion molecule OS=Homo sapiens (Human) OX=9606 GN=OPCML PE=1 SV=1;>sp|Q14982-2|OPCM-2_HUMAN Isoform of Q14982, Isoform 2 of Opioid-binding protein/cell adhesion molecule OS=Homo sapiens (Human) OX=9606 GN=OPCML PE=2 SV=1;>sp|Q14982-3|OPCM-3_HUMAN Isoform of Q14982, Isoform 3 of Opioid-binding protein/cell adhesion molecule OS=Homo sapiens (Huma…	OPCML	0.783902	0.0309638	Yes	0.0584525	No	-1.88224
P01876	>sp|P01876|IGHA1_HUMAN Immunoglobulin heavy constant alpha 1 OS=Homo sapiens (Human) OX=9606 GN=IGHA1 PE=1 SV=2	IGHA1	1.75041	0.0310696	Yes	0.0585252	No	1.88096
O60939	>sp|O60939|SCN2B_HUMAN Sodium channel subunit beta-2 OS=Homo sapiens (Human) OX=9606 GN=SCN2B PE=1 SV=1	SCN2B	0.693061	0.0311008	Yes	0.0585252	No	-1.88056
Q9NZN4	>sp|Q9NZN4|EHD2_HUMAN EH domain-containing protein 2 OS=Homo sapiens (Human) OX=9606 GN=EHD2 PE=1 SV=2	EHD2	1.82669	0.0312758	Yes	0.0587614	No	1.87827
O75335	>sp|O75335|LIPA4_HUMAN Liprin-alpha-4 OS=Homo sapiens (Human) OX=9606 GN=PPFIA4 PE=2 SV=3	PPFIA4	0.567468	0.0313475	Yes	0.058803	No	-1.87736
P00352	>sp|P00352|AL1A1_HUMAN Retinal dehydrogenase 1 OS=Homo sapiens (Human) OX=9606 GN=ALDH1A1 PE=1 SV=2	ALDH1A1	1.49624	0.031745	Yes	0.0591747	No	1.87258
P10915	>sp|P10915|HPLN1_HUMAN Hyaluronan and proteoglycan link protein 1 OS=Homo sapiens (Human) OX=9606 GN=HAPLN1 PE=2 SV=2	HAPLN1	2.0896	0.0316967	Yes	0.0591747	No	1.87316
Q8N9R8;Q8N9R8-2	>sp|Q8N9R8|SCAI_HUMAN Protein SCAI OS=Homo sapiens (Human) OX=9606 GN=SCAI PE=1 SV=2;>sp|Q8N9R8-2|SCAI-2_HUMAN Isoform of Q8N9R8, Isoform 2 of Protein SCAI OS=Homo sapiens (Human) OX=9606 GN=SCAI PE=1 SV=2	SCAI	0.365166	0.0317158	Yes	0.0591747	No	-1.87294
P61758	>sp|P61758|PFD3_HUMAN Prefoldin subunit 3 OS=Homo sapiens (Human) OX=9606 GN=VBP1 PE=1 SV=4	VBP1	2.77677	0.0316225	Yes	0.0591747	No	1.87404
Q9UQM7	>sp|Q9UQM7|KCC2A_HUMAN Calcium/calmodulin-dependent protein kinase type II subunit alpha OS=Homo sapiens (Human) OX=9606 GN=CAMK2A PE=1 SV=2	CAMK2A	0.804968	0.031865	Yes	0.0593053	No	-1.87105
Q86X76;Q86X76-2;Q86X76-4	>sp|Q86X76|NIT1_HUMAN Deaminated glutathione amidase OS=Homo sapiens (Human) OX=9606 GN=NIT1 PE=1 SV=2;>sp|Q86X76-2|NIT1-2_HUMAN Isoform of Q86X76, Isoform 1 of Deaminated glutathione amidase OS=Homo sapiens (Human) OX=9606 GN=NIT1 PE=1 SV=2;>sp|Q86X76-4|NIT1-4_HUMAN Isoform of Q86X76, Isoform 5 of Deaminated glutathione amidase OS=Homo sapiens (Human) OX=9606 GN=NIT1 PE=1 SV=2	NIT1	1.39879	0.03196	Yes	0.059389	No	1.86996
P18433;P18433-2;P18433-3;P18433-4	>sp|P18433|PTPRA_HUMAN Receptor-type tyrosine-protein phosphatase alpha OS=Homo sapiens (Human) OX=9606 GN=PTPRA PE=1 SV=3;>sp|P18433-2|PTPRA_HUMAN Isoform 2 of Receptor-type tyrosine-protein phosphatase alpha OS=Homo sapiens GN=PTPRA;>sp|P18433-3|PTPRA_HUMAN Isoform 3 of Receptor-type tyrosine-protein phosphatase alpha OS=Homo sapiens GN=PTPRA;>sp|P18433-4|PTPRA_HUMAN Isoform 4 of Receptor-type …	PTPRA	1.27909	0.0321425	Yes	0.0595518	No	1.86791
Q99536	>sp|Q99536|VAT1_HUMAN Synaptic vesicle membrane protein VAT-1 homolog OS=Homo sapiens (Human) OX=9606 GN=VAT1 PE=1 SV=2	VAT1	1.51775	0.0321479	Yes	0.0595518	No	1.86785
Q8IV08	>sp|Q8IV08|PLD3_HUMAN Phospholipase D3 OS=Homo sapiens (Human) OX=9606 GN=PLD3 PE=1 SV=1	PLD3	0.687514	0.0325454	Yes	0.0601943	No	-1.86308
P68366;P68366-2	>sp|P68366|TBA4A_HUMAN Tubulin alpha-4A chain OS=Homo sapiens (Human) OX=9606 GN=TUBA4A PE=1 SV=1;>sp|P68366-2|TBA4A-2_HUMAN Isoform of P68366, Isoform 2 of Tubulin alpha-4A chain OS=Homo sapiens (Human) OX=9606 GN=TUBA4A PE=1 SV=1	TUBA4A	0.826722	0.0326379	Yes	0.0602715	No	-1.86193
Q9Y224	>sp|Q9Y224|RTRAF_HUMAN RNA transcription, translation and transport factor protein OS=Homo sapiens (Human) OX=9606 GN=RTRAF PE=1 SV=1	RTRAF	0.710625	0.0327983	Yes	0.0603217	No	-1.86017
P43007	>sp|P43007|SATT_HUMAN Neutral amino acid transporter A OS=Homo sapiens (Human) OX=9606 GN=SLC1A4 PE=1 SV=1	SLC1A4	1.36458	0.0327838	Yes	0.0603217	No	1.86032
Q8TAF3	>sp|Q8TAF3|WDR48_HUMAN WD repeat-containing protein 48 OS=Homo sapiens (Human) OX=9606 GN=WDR48 PE=1 SV=1	WDR48	2.13411	0.0328175	Yes	0.0603217	No	1.85992
Q9H425;Q9H425-3	>sp|Q9H425|CA198_HUMAN Uncharacterized protein C1orf198 OS=Homo sapiens (Human) OX=9606 GN=C1orf198 PE=1 SV=1;>sp|Q9H425-3|CA198-3_HUMAN Isoform of Q9H425, Isoform 3 of Uncharacterized protein C1orf198 OS=Homo sapiens (Human) OX=9606 GN=C1orf198 PE=1 SV=1	C1ORF198	1.55098	0.0328813	Yes	0.0603454	No	1.85915
O14656	>sp|O14656|TOR1A_HUMAN Torsin-1A OS=Homo sapiens (Human) OX=9606 GN=TOR1A PE=1 SV=1	TOR1A	0.540655	0.0330308	Yes	0.0605264	No	-1.85744
E7EQL5;E7EV09;Q13409;Q13409-2;Q13409-3;Q13409-5;Q1	NA	DYNC1I2	1.64238	0.0331292	Yes	0.060613	No	1.85633
Q99963;Q99963-3;Q99963-4	>sp|Q99963|SH3G3_HUMAN Endophilin-A3 OS=Homo sapiens (Human) OX=9606 GN=SH3GL3 PE=1 SV=1;>sp|Q99963-3|SH3G3-3_HUMAN Isoform of Q99963, Isoform 3 of Endophilin-A3 OS=Homo sapiens (Human) OX=9606 GN=SH3GL3 PE=1 SV=1;>sp|Q99963-4|SH3G3-4_HUMAN Isoform of Q99963, Isoform 4 of Endophilin-A3 OS=Homo sapiens (Human) OX=9606 GN=SH3GL3 PE=1 SV=1	SH3GL3	0.80034	0.0332721	Yes	0.0607809	No	-1.85479
J3KTL2;Q07955;Q07955-2;Q07955-3	>tr|J3KTL2|J3KTL2_HUMAN Isoform of Q07955, Serine/arginine-rich-splicing factor 1 OS=Homo sapiens (Human) OX=9606 GN=SRSF1 PE=1 SV=1;>sp|Q07955|SRSF1_HUMAN Serine/arginine-rich splicing factor 1 OS=Homo sapiens (Human) OX=9606 GN=SRSF1 PE=1 SV=2;>sp|Q07955-2|SRSF1-2_HUMAN Isoform of Q07955, Isoform ASF-2 of Serine/arginine-rich splicing factor 1 OS=Homo sapiens (Human) OX=9606 GN=SRSF1 PE=1 SV=2;…	SRSF1	1.21962	0.0334192	Yes	0.0609558	No	1.853
Q9BPW8	>sp|Q9BPW8|NIPS1_HUMAN Protein NipSnap homolog 1 OS=Homo sapiens (Human) OX=9606 GN=NIPSNAP1 PE=1 SV=1	NIPSNAP1	0.781282	0.0334733	Yes	0.0609609	No	-1.85234
Q15075	>sp|Q15075|EEA1_HUMAN Early endosome antigen 1 OS=Homo sapiens (Human) OX=9606 GN=EEA1 PE=1 SV=2	EEA1	0.810988	0.0336421	Yes	0.0610809	No	-1.8502
Q96CN7	>sp|Q96CN7|ISOC1_HUMAN Isochorismatase domain-containing protein 1 OS=Homo sapiens (Human) OX=9606 GN=ISOC1 PE=1 SV=3	ISOC1	1.8896	0.0336258	Yes	0.0610809	No	1.85042
Q8TBP6	>sp|Q8TBP6|S2540_HUMAN Solute carrier family 25 member 40 OS=Homo sapiens (Human) OX=9606 GN=SLC25A40 PE=1 SV=1	SLC25A40	0.35425	0.0337033	Yes	0.0610987	No	-1.84956
C9J9W2;Q14847;Q14847-2;Q14847-3	>tr|C9J9W2|C9J9W2_HUMAN Isoform of Q14847, LIM and SH3 domain protein 1 (Fragment) OS=Homo sapiens (Human) OX=9606 GN=LASP1 PE=1 SV=1;>sp|Q14847|LASP1_HUMAN LIM and SH3 domain protein 1 OS=Homo sapiens (Human) OX=9606 GN=LASP1 PE=1 SV=2;>sp|Q14847-2|LASP1-2_HUMAN Isoform of Q14847, Isoform 2 of LIM and SH3 domain protein 1 OS=Homo sapiens (Human) OX=9606 GN=LASP1 PE=1 SV=2;>sp|Q14847-3|LASP1-3_HU…	LASP1	1.33787	0.0340213	Yes	0.061581	No	1.84593
Q07666;Q07666-2	>sp|Q07666|KHDR1_HUMAN KH domain-containing, RNA-binding, signal transduction-associated protein 1 OS=Homo sapiens (Human) OX=9606 GN=KHDRBS1 PE=1 SV=1;>sp|Q07666-2|KHDR1-2_HUMAN Isoform of Q07666, Isoform 2 of KH domain-containing, RNA-binding, signal transduction-associated protein 1 OS=Homo sapiens (Human) OX=9606 GN=KHDRBS1 PE=1 SV=1	KHDRBS1	0.688126	0.0341408	Yes	0.0617034	No	-1.84443
P35232	>sp|P35232|PHB_HUMAN Prohibitin OS=Homo sapiens (Human) OX=9606 GN=PHB PE=1 SV=1	PHB	0.841343	0.0342117	Yes	0.0617374	No	-1.84363
P27824;P27824-2	>sp|P27824|CALX_HUMAN Calnexin OS=Homo sapiens (Human) OX=9606 GN=CANX PE=1 SV=2;>sp|P27824-2|CALX-2_HUMAN Isoform of P27824, Isoform 2 of Calnexin OS=Homo sapiens (Human) OX=9606 GN=CANX PE=1 SV=2	CANX	1.33144	0.0342975	Yes	0.0617402	No	1.84258
Q7Z4S6;Q7Z4S6-2	>sp|Q7Z4S6|KI21A_HUMAN Kinesin-like protein KIF21A OS=Homo sapiens (Human) OX=9606 GN=KIF21A PE=1 SV=2;>sp|Q7Z4S6-2|KI21A-2_HUMAN Isoform of Q7Z4S6, Isoform 2 of Kinesin-like protein KIF21A OS=Homo sapiens (Human) OX=9606 GN=KIF21A PE=1 SV=2	KIF21A	0.789257	0.0343692	Yes	0.0617402	No	-1.84169
P03886	>sp|P03886|NU1M_HUMAN NADH-ubiquinone oxidoreductase chain 1 OS=Homo sapiens (Human) OX=9606 GN=MT-ND1 PE=1 SV=1	MT-ND1	0.712989	0.0343529	Yes	0.0617402	No	-1.84187
O76041-2	>sp|O76041-2|NEBL-2_HUMAN Isoform of O76041, Isoform 2 of Nebulette OS=Homo sapiens (Human) OX=9606 GN=NEBL PE=1 SV=1	NEBL	1.60442	0.0346738	Yes	0.0621932	No	1.83815
E9PL57	>tr|E9PL57|E9PL57_HUMAN NEDD8-MDP1 readthrough, Ubiquitin-like domain-containing protein (Fragment) OS=Homo sapiens (Human) OX=9606 GN=NEDD8-MDP1 PE=4 SV=1	NEDD8-MDP1	2.11151	0.0347413	Yes	0.0622203	No	1.83745
Q9UHD8-5	>sp|Q9UHD8-5|SEPT9-5_HUMAN Isoform of Q9UHD8, Isoform 5 of Septin-9 OS=Homo sapiens (Human) OX=9606 GN=SEPTIN9 PE=1 SV=2	SEPTIN9	1.2196	0.034825	Yes	0.0622764	No	1.83647
E7ETT1;E7ETT4;E7EX59;E9PDR0;P05166;P05166-2	>tr|E7ETT1|E7ETT1_HUMAN Isoform of P05166, Propionyl-CoA carboxylase beta chain, mitochondrial OS=Homo sapiens (Human) OX=9606 GN=PCCB PE=1 SV=1;>tr|E7ETT4|E7ETT4_HUMAN Isoform of P05166, Propionyl-CoA carboxylase beta chain, mitochondrial OS=Homo sapiens (Human) OX=9606 GN=PCCB PE=1 SV=1;>tr|E7EX59|E7EX59_HUMAN Isoform of P05166, Propionyl-CoA carboxylase beta chain, mitochondrial OS=Homo sapien…	PCCB	0.788475	0.0350742	Yes	0.0625648	No	-1.83361
Q92623	>sp|Q92623|TTC9A_HUMAN Tetratricopeptide repeat protein 9A OS=Homo sapiens (Human) OX=9606 GN=TTC9 PE=1 SV=3	TTC9	0.721233	0.0350917	Yes	0.0625648	No	-1.83344
Q13884	>sp|Q13884|SNTB1_HUMAN Beta-1-syntrophin OS=Homo sapiens (Human) OX=9606 GN=SNTB1 PE=1 SV=3	SNTB1	1.64327	0.0351604	Yes	0.0625934	No	1.83272
Q96PY5-3	>sp|Q96PY5-3|FMNL2-3_HUMAN Isoform of Q96PY5, Isoform 2 of Formin-like protein 2 OS=Homo sapiens (Human) OX=9606 GN=FMNL2 PE=1 SV=3	FMNL2	1.47258	0.0354025	Yes	0.0627421	No	1.8301
A0A0A0MT83;P26440;P26440-2	>tr|A0A0A0MT83|A0A0A0MT83_HUMAN Isoform of P26440, Isovaleryl-CoA dehydrogenase isoform 1 OS=Homo sapiens (Human) OX=9606 GN=IVD PE=1 SV=2;>sp|P26440|IVD_HUMAN Isovaleryl-CoA dehydrogenase, mitochondrial OS=Homo sapiens (Human) OX=9606 GN=IVD PE=1 SV=2;>sp|P26440-2|IVD-2_HUMAN Isoform of P26440, Isoform 2 of Isovaleryl-CoA dehydrogenase, mitochondrial OS=Homo sapiens (Human) OX=9606 GN=IVD PE=1 S…	IVD	1.35252	0.0353217	Yes	0.0627421	No	1.83092
C9JB30;Q9UPY8	>tr|C9JB30|C9JB30_HUMAN Isoform of Q9UPY8, Calponin-homology (CH) domain-containing protein (Fragment) OS=Homo sapiens (Human) OX=9606 GN=MAPRE3 PE=1 SV=1;>sp|Q9UPY8|MARE3_HUMAN Microtubule-associated protein RP/EB family member 3 OS=Homo sapiens (Human) OX=9606 GN=MAPRE3 PE=1 SV=1	MAPRE3	0.816531	0.0353987	Yes	0.0627421	No	-1.83016
G3V1N2	>tr|G3V1N2|G3V1N2_HUMAN Isoform of P69905, GLOBIN domain-containing protein OS=Homo sapiens (Human) OX=9606 GN=HBA2 PE=1 SV=1	HBA2	1.37226	0.0356017	Yes	0.0630011	No	1.82785
P61201;P61201-2	>sp|P61201|CSN2_HUMAN COP9 signalosome complex subunit 2 OS=Homo sapiens (Human) OX=9606 GN=COPS2 PE=1 SV=1;>sp|P61201-2|CSN2-2_HUMAN Isoform of P61201, Isoform 2 of COP9 signalosome complex subunit 2 OS=Homo sapiens (Human) OX=9606 GN=COPS2 PE=1 SV=1	COPS2	0.697653	0.0360675	Yes	0.0636358	No	-1.82295
H7BY35;Q92736;Q92736-2	>tr|H7BY35|H7BY35_HUMAN Isoform of Q92736, Ryanodine receptor 2 OS=Homo sapiens (Human) OX=9606 GN=RYR2 PE=1 SV=2;>sp|Q92736|RYR2_HUMAN Ryanodine receptor 2 OS=Homo sapiens (Human) OX=9606 GN=RYR2 PE=1 SV=3;>sp|Q92736-2|RYR2-2_HUMAN Isoform of Q92736, Isoform 2 of Ryanodine receptor 2 OS=Homo sapiens (Human) OX=9606 GN=RYR2 PE=1 SV=3	RYR2	0.706304	0.0360558	Yes	0.0636358	No	-1.82309
Q01484	>sp|Q01484|ANK2_HUMAN Ankyrin-2 OS=Homo sapiens (Human) OX=9606 GN=ANK2 PE=1 SV=4	ANK2	1.23269	0.0362738	Yes	0.0637961	No	1.82079
Q8NEU8;Q8NEU8-3	>sp|Q8NEU8|DP13B_HUMAN DCC-interacting protein 13-beta OS=Homo sapiens (Human) OX=9606 GN=APPL2 PE=1 SV=3;>sp|Q8NEU8-3|DP13B-3_HUMAN Isoform of Q8NEU8, Isoform 3 of DCC-interacting protein 13-beta OS=Homo sapiens (Human) OX=9606 GN=APPL2 PE=1 SV=3	APPL2	1.30617	0.0363196	Yes	0.0637961	No	1.82031
F6U236;Q9BY11	>tr|F6U236|F6U236_HUMAN Isoform of Q9BY11, Protein kinase C and casein kinase substrate in neurons protein 1 OS=Homo sapiens (Human) OX=9606 GN=PACSIN1 PE=1 SV=1;>sp|Q9BY11|PACN1_HUMAN Protein kinase C and casein kinase substrate in neurons protein 1 OS=Homo sapiens (Human) OX=9606 GN=PACSIN1 PE=1 SV=1	PACSIN1	0.73708	0.0362221	Yes	0.0637961	No	-1.82135
P54920	>sp|P54920|SNAA_HUMAN Alpha-soluble NSF attachment protein OS=Homo sapiens (Human) OX=9606 GN=NAPA PE=1 SV=3	NAPA	0.86999	0.036565	Yes	0.0641324	No	-1.81775
P16615	>sp|P16615|AT2A2_HUMAN Sarcoplasmic/endoplasmic reticulum calcium ATPase 2 OS=Homo sapiens (Human) OX=9606 GN=ATP2A2 PE=1 SV=1	ATP2A2	0.816762	0.0370283	Yes	0.0644078	No	-1.81277
E7EN11;H0Y476;O00305;O00305-2;O00305-3;O00305-4	>tr|E7EN11|E7EN11_HUMAN Isoform of O00305, SH3 domain-containing protein OS=Homo sapiens (Human) OX=9606 GN=CACNB4 PE=1 SV=2;>tr|H0Y476|H0Y476_HUMAN Isoform of O00305, SH3 domain-containing protein OS=Homo sapiens (Human) OX=9606 GN=CACNB4 PE=1 SV=2;>sp|O00305|CACB4_HUMAN Voltage-dependent L-type calcium channel subunit beta-4 OS=Homo sapiens (Human) OX=9606 GN=CACNB4 PE=1 SV=2;>sp|O00305-2|CACB4…	CACNB4	0.759921	0.0370475	Yes	0.0644078	No	-1.81257
Q6UWR7	>sp|Q6UWR7|ENPP6_HUMAN Glycerophosphocholine cholinephosphodiesterase ENPP6 OS=Homo sapiens (Human) OX=9606 GN=ENPP6 PE=1 SV=2	ENPP6	0.432804	0.0369046	Yes	0.0644078	No	-1.81413
P06702	>sp|P06702|S10A9_HUMAN Protein S100-A9 OS=Homo sapiens (Human) OX=9606 GN=S100A9 PE=1 SV=1	S100A9	1.93832	0.0370275	Yes	0.0644078	No	1.81277
Q5VIR6-4	>sp|Q5VIR6-4|VPS53-4_HUMAN Isoform of Q5VIR6, Isoform 4 of Vacuolar protein sorting-associated protein 53 homolog OS=Homo sapiens (Human) OX=9606 GN=VPS53 PE=1 SV=1	VPS53	0.817979	0.0368079	Yes	0.0644078	No	-1.81513
A6NG10;B4DFG2;K7EIJ0;K7EMC9;K7ENL2;Q969T9	>tr|A6NG10|A6NG10_HUMAN Isoform of Q969T9, GRAM domain-containing protein OS=Homo sapiens (Human) OX=9606 GN=WBP2 PE=1 SV=2;>tr|B4DFG2|B4DFG2_HUMAN WW domain-binding protein 2 OS=Homo sapiens GN=WBP2 PE=2 SV=1;>tr|K7EIJ0|K7EIJ0_HUMAN Isoform of Q969T9, GRAM domain-containing protein (Fragment) OS=Homo sapiens (Human) OX=9606 GN=WBP2 PE=1 SV=1;>tr|K7EMC9|K7EMC9_HUMAN Isoform of Q969T9, GRAM domain…	WBP2	0.767764	0.0368733	Yes	0.0644078	No	-1.81445
Q8TB96	>sp|Q8TB96|TIP_HUMAN T-cell immunomodulatory protein OS=Homo sapiens (Human) OX=9606 GN=ITFG1 PE=1 SV=1	ITFG1	0.48314	0.0374662	Yes	0.0650406	No	-1.8083
O14773;O14773-2	>sp|O14773|TPP1_HUMAN Tripeptidyl-peptidase 1 OS=Homo sapiens (Human) OX=9606 GN=TPP1 PE=1 SV=2;>sp|O14773-2|TPP1-2_HUMAN Isoform of O14773, Isoform 2 of Tripeptidyl-peptidase 1 OS=Homo sapiens (Human) OX=9606 GN=TPP1 PE=1 SV=2	TPP1	1.49047	0.0375758	Yes	0.0651356	No	1.80706
Q9UPV7	>sp|Q9UPV7|PHF24_HUMAN PHD finger protein 24 OS=Homo sapiens (Human) OX=9606 GN=PHF24 PE=1 SV=2	PHF24	0.844655	0.0377917	Yes	0.0652241	No	-1.8049
A0A0A0MRE3;G3V5X4;Q8WXH0;Q8WXH0-2	>tr|A0A0A0MRE3|A0A0A0MRE3_HUMAN Isoform of Q8WXH0, Nesprin-2 OS=Homo sapiens (Human) OX=9606 GN=SYNE2 PE=1 SV=1;>tr|G3V5X4|G3V5X4_HUMAN Isoform of Q8WXH0, Nesprin-2 OS=Homo sapiens (Human) OX=9606 GN=SYNE2 PE=1 SV=1;>sp|Q8WXH0|SYNE2_HUMAN Nesprin-2 OS=Homo sapiens (Human) OX=9606 GN=SYNE2 PE=1 SV=3;>sp|Q8WXH0-2|SYNE2-2_HUMAN Isoform of Q8WXH0, Isoform 2 of Nesprin-2 OS=Homo sapiens (Human) OX=960…	SYNE2	0.749688	0.0377742	Yes	0.0652241	No	-1.80505
P54577	>sp|P54577|SYYC_HUMAN Tyrosine--tRNA ligase, cytoplasmic OS=Homo sapiens (Human) OX=9606 GN=YARS PE=1 SV=4	YARS	0.759478	0.0377212	Yes	0.0652241	No	-1.8056
A0A087WWM6;E7EQL6;O43272;O43272-1;O43272-2	>tr|A0A087WWM6|A0A087WWM6_HUMAN Isoform of O43272, Proline dehydrogenase OS=Homo sapiens (Human) OX=9606 GN=PRODH PE=1 SV=1;>tr|E7EQL6|E7EQL6_HUMAN Isoform of O43272, Proline dehydrogenase OS=Homo sapiens (Human) OX=9606 GN=PRODH PE=1 SV=1;>sp|O43272|PROD_HUMAN Proline dehydrogenase 1, mitochondrial OS=Homo sapiens (Human) OX=9606 GN=PRODH PE=1 SV=3;>sp|O43272-1|PROD-1_HUMAN Isoform of O43272, Is…	PRODH	1.66241	0.0378846	Yes	0.0652895	No	1.80404
O95168;O95168-2	>sp|O95168|NDUB4_HUMAN NADH dehydrogenase [ubiquinone] 1 beta subcomplex subunit 4 OS=Homo sapiens (Human) OX=9606 GN=NDUFB4 PE=1 SV=3;>sp|O95168-2|NDUB4-2_HUMAN Isoform of O95168, Isoform 2 of NADH dehydrogenase [ubiquinone] 1 beta subcomplex subunit 4 OS=Homo sapiens (Human) OX=9606 GN=NDUFB4 PE=1 SV=3	NDUFB4	0.768602	0.0380883	Yes	0.0655455	No	-1.80192
Q9Y5Z4;Q9Y5Z4-2	>sp|Q9Y5Z4|HEBP2_HUMAN Heme-binding protein 2 OS=Homo sapiens (Human) OX=9606 GN=HEBP2 PE=1 SV=1;>sp|Q9Y5Z4-2|HEBP2-2_HUMAN Isoform of Q9Y5Z4, Isoform 2 of Heme-binding protein 2 OS=Homo sapiens (Human) OX=9606 GN=HEBP2 PE=1 SV=1	HEBP2	2.28329	0.0385238	Yes	0.0661989	No	1.79727
Q9P1U1;Q9P1U1-2	>sp|Q9P1U1|ARP3B_HUMAN Actin-related protein 3B OS=Homo sapiens (Human) OX=9606 GN=ACTR3B PE=2 SV=1;>sp|Q9P1U1-2|ARP3B-2_HUMAN Isoform of Q9P1U1, Isoform 2 of Actin-related protein 3B OS=Homo sapiens (Human) OX=9606 GN=ACTR3B PE=2 SV=1	ACTR3B	0.778247	0.0386404	Yes	0.0662256	No	-1.79606
Q9NUQ9	>sp|Q9NUQ9|FA49B_HUMAN Protein FAM49B OS=Homo sapiens (Human) OX=9606 GN=FAM49B PE=1 SV=1	FAM49B	0.818614	0.0386508	Yes	0.0662256	No	-1.79598
P05141	>sp|P05141|ADT2_HUMAN ADP/ATP translocase 2 OS=Homo sapiens (Human) OX=9606 GN=SLC25A5 PE=1 SV=7	SLC25A5	0.837966	0.0388013	Yes	0.0663875	No	-1.79454
P10155;P10155-3;P10155-4;P10155-5	>sp|P10155|RO60_HUMAN 60 kDa SS-A/Ro ribonucleoprotein OS=Homo sapiens (Human) OX=9606 GN=RO60 PE=1 SV=2;>sp|P10155-3|RO60-3_HUMAN Isoform of P10155, Isoform 3 of 60 kDa SS-A/Ro ribonucleoprotein OS=Homo sapiens (Human) OX=9606 GN=RO60 PE=1 SV=2;>sp|P10155-4|RO60-4_HUMAN Isoform of P10155, Isoform 4 of 60 kDa SS-A/Ro ribonucleoprotein OS=Homo sapiens (Human) OX=9606 GN=RO60 PE=1 SV=2;>sp|P10155-5…	RO60	1.55633	0.0389033	Yes	0.0664664	No	1.79348
Q92845;Q92845-2;Q92845-3	>sp|Q92845|KIFA3_HUMAN Kinesin-associated protein 3 OS=Homo sapiens (Human) OX=9606 GN=KIFAP3 PE=1 SV=2;>sp|Q92845-2|KIFA3-2_HUMAN Isoform of Q92845, Isoform 2 of Kinesin-associated protein 3 OS=Homo sapiens (Human) OX=9606 GN=KIFAP3 PE=1 SV=2;>sp|Q92845-3|KIFA3-3_HUMAN Isoform of Q92845, Isoform 3 of Kinesin-associated protein 3 OS=Homo sapiens (Human) OX=9606 GN=KIFAP3 PE=1 SV=2	KIFAP3	0.704849	0.0389729	Yes	0.0664896	No	-1.79286
Q5SYC1	>sp|Q5SYC1|CLVS2_HUMAN Clavesin-2 OS=Homo sapiens (Human) OX=9606 GN=CLVS2 PE=2 SV=1	CLVS2	0.673133	0.0391404	Yes	0.0666796	No	-1.79107
K7EQA9;Q16543	>tr|K7EQA9|K7EQA9_HUMAN Isoform of Q16543, Hsp90 co-chaperone Cdc37 (Fragment) OS=Homo sapiens (Human) OX=9606 GN=CDC37 PE=1 SV=1;>sp|Q16543|CDC37_HUMAN Hsp90 co-chaperone Cdc37 OS=Homo sapiens (Human) OX=9606 GN=CDC37 PE=1 SV=1	CDC37	0.842179	0.0392754	Yes	0.0667181	No	-1.78977
A0A087WWK8;Q6DN90;Q6DN90-2	>tr|A0A087WWK8|A0A087WWK8_HUMAN Isoform of Q6DN90, SEC7 domain-containing protein OS=Homo sapiens (Human) OX=9606 GN=IQSEC1 PE=1 SV=1;>sp|Q6DN90|IQEC1_HUMAN IQ motif and SEC7 domain-containing protein 1 OS=Homo sapiens (Human) OX=9606 GN=IQSEC1 PE=1 SV=1;>sp|Q6DN90-2|IQEC1-2_HUMAN Isoform of Q6DN90, Isoform 2 of IQ motif and SEC7 domain-containing protein 1 OS=Homo sapiens (Human) OX=9606 GN=IQSE…	IQSEC1	0.82633	0.0392508	Yes	0.0667181	No	-1.79005
Q9H008	>sp|Q9H008|LHPP_HUMAN Phospholysine phosphohistidine inorganic pyrophosphate phosphatase OS=Homo sapiens (Human) OX=9606 GN=LHPP PE=1 SV=2	LHPP	1.57752	0.039875	Yes	0.0675695	No	1.78382
P43034	>sp|P43034|LIS1_HUMAN Platelet-activating factor acetylhydrolase IB subunit alpha OS=Homo sapiens (Human) OX=9606 GN=PAFAH1B1 PE=1 SV=2	PAFAH1B1	1.24144	0.0398904	Yes	0.0675695	No	1.78366
E9PCG9;Q02338	>tr|E9PCG9|E9PCG9_HUMAN Isoform of Q02338, D-beta-hydroxybutyrate dehydrogenase, mitochondrial OS=Homo sapiens (Human) OX=9606 GN=BDH1 PE=1 SV=1;>sp|Q02338|BDH_HUMAN D-beta-hydroxybutyrate dehydrogenase, mitochondrial OS=Homo sapiens (Human) OX=9606 GN=BDH1 PE=1 SV=3	BDH1	0.756022	0.0400383	Yes	0.0677235	No	-1.78228
P01023	>sp|P01023|A2MG_HUMAN Alpha-2-macroglobulin OS=Homo sapiens (Human) OX=9606 GN=A2M PE=1 SV=3	A2M	1.3673	0.04021	Yes	0.0679171	No	1.78058
E9PJ55;Q9NUJ3	>tr|E9PJ55|E9PJ55_HUMAN Isoform of Q9NUJ3, T-complex protein 11-like protein 1 OS=Homo sapiens (Human) OX=9606 GN=TCP11L1 PE=1 SV=1;>sp|Q9NUJ3|T11L1_HUMAN T-complex protein 11-like protein 1 OS=Homo sapiens (Human) OX=9606 GN=TCP11L1 PE=1 SV=1	TCP11L1	0.63982	0.0402838	Yes	0.067945	No	-1.77977
P31939	>sp|P31939|PUR9_HUMAN Bifunctional purine biosynthesis protein PURH OS=Homo sapiens (Human) OX=9606 GN=ATIC PE=1 SV=3	ATIC	1.32482	0.0403992	Yes	0.068043	No	1.77857
A0A0A0MS52;Q13555-5;Q5SWX3	>tr|A0A0A0MS52|A0A0A0MS52_HUMAN Calcium/calmodulin-dependent protein kinase (CaM kinase) II gamma, isoform CRA_a OS=Homo sapiens GN=CAMK2G PE=4 SV=1;>sp|Q13555-5|KCC2G-5_HUMAN Isoform of Q13555, Isoform 5 of Calcium/calmodulin-dependent protein kinase type II subunit gamma OS=Homo sapiens (Human) OX=9606 GN=CAMK2G PE=1 SV=4;>tr|Q5SWX3|Q5SWX3_HUMAN Isoform of Q13555, Protein kinase domain-containi…	CAMK2G	0.802197	0.0405542	Yes	0.0682073	No	-1.77692
Q7Z3D6;Q7Z3D6-2;Q7Z3D6-3;Q7Z3D6-5	>sp|Q7Z3D6|GLUCM_HUMAN D-glutamate cyclase, mitochondrial OS=Homo sapiens (Human) OX=9606 GN=DGLUCY PE=1 SV=2;>sp|Q7Z3D6-2|GLUCM-2_HUMAN Isoform of Q7Z3D6, Isoform 2 of D-glutamate cyclase, mitochondrial OS=Homo sapiens (Human) OX=9606 GN=DGLUCY PE=1 SV=2;>sp|Q7Z3D6-3|GLUCM-3_HUMAN Isoform of Q7Z3D6, Isoform 3 of D-glutamate cyclase, mitochondrial OS=Homo sapiens (Human) OX=9606 GN=DGLUCY PE=1 SV…	DGLUCY	1.65432	0.0406879	Yes	0.0683355	No	1.77564
Q9UN86	>sp|Q9UN86|G3BP2_HUMAN Ras GTPase-activating protein-binding protein 2 OS=Homo sapiens (Human) OX=9606 GN=G3BP2 PE=1 SV=2	G3BP2	0.542295	0.0408054	Yes	0.068436	No	-1.77451
Q99747	>sp|Q99747|SNAG_HUMAN Gamma-soluble NSF attachment protein OS=Homo sapiens (Human) OX=9606 GN=NAPG PE=1 SV=1	NAPG	0.792016	0.0409363	Yes	0.0685586	No	-1.77312
Q9NZ08;Q9NZ08-2	>sp|Q9NZ08|ERAP1_HUMAN Endoplasmic reticulum aminopeptidase 1 OS=Homo sapiens (Human) OX=9606 GN=ERAP1 PE=1 SV=3;>sp|Q9NZ08-2|ERAP1-2_HUMAN Isoform of Q9NZ08, Isoform 2 of Endoplasmic reticulum aminopeptidase 1 OS=Homo sapiens (Human) OX=9606 GN=ERAP1 PE=1 SV=3	ERAP1	1.67544	0.0410592	Yes	0.0686676	No	1.77195
Q9UHY7	>sp|Q9UHY7|ENOPH_HUMAN Enolase-phosphatase E1 OS=Homo sapiens (Human) OX=9606 GN=ENOPH1 PE=1 SV=1	ENOPH1	1.22802	0.0411525	Yes	0.0687269	No	1.77099
P08572	>sp|P08572|CO4A2_HUMAN Collagen alpha-2(IV) chain OS=Homo sapiens (Human) OX=9606 GN=COL4A2 PE=1 SV=4	COL4A2	2.1636	0.0414775	Yes	0.0691226	No	1.76806
P48506	>sp|P48506|GSH1_HUMAN Glutamate--cysteine ligase catalytic subunit OS=Homo sapiens (Human) OX=9606 GN=GCLC PE=1 SV=2	GCLC	1.39253	0.0415058	Yes	0.0691226	No	1.76777
A0A0A0MRL6;F8W8M4;O14639;O14639-2;O14639-6	>tr|A0A0A0MRL6|A0A0A0MRL6_HUMAN Isoform of O14639, Actin-binding LIM protein 1 OS=Homo sapiens (Human) OX=9606 GN=ABLIM1 PE=1 SV=1;>tr|F8W8M4|F8W8M4_HUMAN Isoform of O14639, Actin-binding LIM protein 1 OS=Homo sapiens (Human) OX=9606 GN=ABLIM1 PE=1 SV=1;>sp|O14639|ABLM1_HUMAN Actin-binding LIM protein 1 OS=Homo sapiens (Human) OX=9606 GN=ABLIM1 PE=1 SV=3;>sp|O14639-2|ABLM1-2_HUMAN Isoform of O146…	ABLIM1	1.52384	0.0421438	Yes	0.0700866	No	1.76174
P07099	>sp|P07099|HYEP_HUMAN Epoxide hydrolase 1 OS=Homo sapiens (Human) OX=9606 GN=EPHX1 PE=1 SV=1	EPHX1	1.39651	0.0423446	Yes	0.0703221	No	1.75997
E9PJP2;Q5TF21	>tr|E9PJP2|E9PJP2_HUMAN Isoform of Q5TF21, Protein SOGA3 OS=Homo sapiens (Human) OX=9606 GN=SOGA3 PE=1 SV=1;>sp|Q5TF21|SOGA3_HUMAN Protein SOGA3 OS=Homo sapiens (Human) OX=9606 GN=SOGA3 PE=3 SV=1	SOGA3	0.79223	0.0426454	Yes	0.0707228	No	-1.75701
Q9NZN3	>sp|Q9NZN3|EHD3_HUMAN EH domain-containing protein 3 OS=Homo sapiens (Human) OX=9606 GN=EHD3 PE=1 SV=2	EHD3	0.813753	0.0427587	Yes	0.0708119	No	-1.75588
Q8IUQ0	>sp|Q8IUQ0|CLVS1_HUMAN Clavesin-1 OS=Homo sapiens (Human) OX=9606 GN=CLVS1 PE=1 SV=1	CLVS1	0.530957	0.0430817	Yes	0.0709652	No	-1.75286
A0A0A6YYI7;Q9UJU6;Q9UJU6-2;Q9UJU6-3;Q9UJU6-6	>tr|A0A0A6YYI7|A0A0A6YYI7_HUMAN Drebrin-like protein OS=Homo sapiens GN=DBNL PE=4 SV=1;>sp|Q9UJU6|DBNL_HUMAN Drebrin-like protein OS=Homo sapiens (Human) OX=9606 GN=DBNL PE=1 SV=1;>sp|Q9UJU6-2|DBNL-2_HUMAN Isoform of Q9UJU6, Isoform 2 of Drebrin-like protein OS=Homo sapiens (Human) OX=9606 GN=DBNL PE=1 SV=1;>sp|Q9UJU6-3|DBNL-3_HUMAN Isoform of Q9UJU6, Isoform 3 of Drebrin-like protein OS=Homo sap…	DBNL	0.67981	0.0430904	Yes	0.0709652	No	-1.7528
A0A087WT48;O60884	>tr|A0A087WT48|A0A087WT48_HUMAN Isoform of O60884, CR-type domain-containing protein (Fragment) OS=Homo sapiens (Human) OX=9606 GN=DNAJA2 PE=1 SV=1;>sp|O60884|DNJA2_HUMAN DnaJ homolog subfamily A member 2 OS=Homo sapiens (Human) OX=9606 GN=DNAJA2 PE=1 SV=1	DNAJA2	0.72776	0.04301	Yes	0.0709652	No	-1.75357
Q9NZB8;Q9NZB8-2;Q9NZB8-7;Q9NZB8-8	>sp|Q9NZB8|MOCS1_HUMAN Molybdenum cofactor biosynthesis protein 1 OS=Homo sapiens (Human) OX=9606 GN=MOCS1 PE=1 SV=3;>sp|Q9NZB8-2|MOCS1-2_HUMAN Isoform of Q9NZB8, Isoform 6 of Molybdenum cofactor biosynthesis protein 1 OS=Homo sapiens (Human) OX=9606 GN=MOCS1 PE=1 SV=3;>sp|Q9NZB8-7|MOCS1-7_HUMAN Isoform of Q9NZB8, Isoform 7 of Molybdenum cofactor biosynthesis protein 1 OS=Homo sapiens (Human) OX=…	MOCS1	0.696935	0.0429571	Yes	0.0709652	No	-1.75405
H7C5G1;Q2TAA2	>tr|H7C5G1|H7C5G1_HUMAN Isoform of Q2TAA2, SGNH_hydro domain-containing protein (Fragment) OS=Homo sapiens (Human) OX=9606 GN=IAH1 PE=1 SV=1;>sp|Q2TAA2|IAH1_HUMAN Isoamyl acetate-hydrolyzing esterase 1 homolog OS=Homo sapiens (Human) OX=9606 GN=IAH1 PE=1 SV=1	IAH1	0.696295	0.0436583	Yes	0.071801	No	-1.74773
Q14240;Q14240-2	>sp|Q14240|IF4A2_HUMAN Eukaryotic initiation factor 4A-II OS=Homo sapiens (Human) OX=9606 GN=EIF4A2 PE=1 SV=2;>sp|Q14240-2|IF4A2-2_HUMAN Isoform of Q14240, Isoform 2 of Eukaryotic initiation factor 4A-II OS=Homo sapiens (Human) OX=9606 GN=EIF4A2 PE=1 SV=2	EIF4A2	0.820481	0.0437413	Yes	0.0718378	No	-1.74709
P42345	>sp|P42345|MTOR_HUMAN Serine/threonine-protein kinase mTOR OS=Homo sapiens (Human) OX=9606 GN=MTOR PE=1 SV=1	MTOR	1.41235	0.0439258	Yes	0.0720027	No	1.7455
O15498	>sp|O15498|YKT6_HUMAN Synaptobrevin homolog YKT6 OS=Homo sapiens (Human) OX=9606 GN=YKT6 PE=1 SV=1	YKT6	1.42182	0.0439629	Yes	0.0720027	No	1.74512
A8MZH3;J3QL64;P02686;P02686-3;P02686-5	>tr|A8MZH3|A8MZH3_HUMAN Isoform of P02686, Myelin basic protein OS=Homo sapiens (Human) OX=9606 GN=MBP PE=1 SV=1;>tr|J3QL64|J3QL64_HUMAN Isoform of P02686, Myelin basic protein OS=Homo sapiens (Human) OX=9606 GN=MBP PE=1 SV=1;>sp|P02686|MBP_HUMAN Myelin basic protein OS=Homo sapiens (Human) OX=9606 GN=MBP PE=1 SV=3;>sp|P02686-3|MBP-3_HUMAN Isoform of P02686, Isoform 3 of Myelin basic protein OS=H…	MBP	0.494912	0.0442296	Yes	0.0723397	No	-1.74265
C9JCY1;C9JPK3;C9JQS3;C9K0E4;E9PFI2;Q9Y2K9	>tr|C9JCY1|C9JCY1_HUMAN Isoform of Q9Y2K9, WD_REPEATS_REGION domain-containing protein OS=Homo sapiens (Human) OX=9606 GN=STXBP5L PE=1 SV=1;>tr|C9JPK3|C9JPK3_HUMAN Isoform of Q9Y2K9, WD_REPEATS_REGION domain-containing protein OS=Homo sapiens (Human) OX=9606 GN=STXBP5L PE=1 SV=1;>tr|C9JQS3|C9JQS3_HUMAN Isoform of Q9Y2K9, Syntaxin-binding protein 5-like (Fragment) OS=Homo sapiens (Human) OX=9606 G…	STXBP5L	0.694482	0.0443	Yes	0.0723552	No	-1.74202
F8VWH9;Q8N6T3;Q8N6T3-2;Q8N6T3-4;Q8N6T3-5	>tr|F8VWH9|F8VWH9_HUMAN Isoform of Q8N6T3, ADP-ribosylation factor GTPase-activating protein 1 OS=Homo sapiens (Human) OX=9606 GN=ARFGAP1 PE=1 SV=1;>sp|Q8N6T3|ARFG1_HUMAN ADP-ribosylation factor GTPase-activating protein 1 OS=Homo sapiens (Human) OX=9606 GN=ARFGAP1 PE=1 SV=2;>sp|Q8N6T3-2|ARFG1-2_HUMAN Isoform of Q8N6T3, Isoform 2 of ADP-ribosylation factor GTPase-activating protein 1 OS=Homo sapi…	ARFGAP1	0.814994	0.0444138	Yes	0.0723935	No	-1.74099
P45880	>sp|P45880|VDAC2_HUMAN Voltage-dependent anion-selective channel protein 2 OS=Homo sapiens (Human) OX=9606 GN=VDAC2 PE=1 SV=2	VDAC2	0.859414	0.0444454	Yes	0.0723935	No	-1.74074
G5E972;P42166;P42167;P42167-2;P42167-3	>tr|G5E972|G5E972_HUMAN Isoform of P42166, Lamina-associated polypeptide 2, isoforms beta/gamma OS=Homo sapiens (Human) OX=9606 GN=TMPO PE=1 SV=1;>sp|P42166|LAP2A_HUMAN Lamina-associated polypeptide 2, isoform alpha OS=Homo sapiens (Human) OX=9606 GN=TMPO PE=1 SV=2;>sp|P42167|LAP2B_HUMAN Isoform of P42166, Lamina-associated polypeptide 2, isoforms beta/gamma OS=Homo sapiens (Human) OX=9606 GN=TMP…	TMPO	0.633981	0.0446054	Yes	0.0725546	No	-1.73937
Q9ULC3	>sp|Q9ULC3|RAB23_HUMAN Ras-related protein Rab-23 OS=Homo sapiens (Human) OX=9606 GN=RAB23 PE=1 SV=1	RAB23	1.35114	0.0448717	Yes	0.0727883	No	1.73701
P61764	>sp|P61764|STXB1_HUMAN Syntaxin-binding protein 1 OS=Homo sapiens (Human) OX=9606 GN=STXBP1 PE=1 SV=1	STXBP1	0.813423	0.0448333	Yes	0.0727883	No	-1.73735
Q13526	>sp|Q13526|PIN1_HUMAN Peptidyl-prolyl cis-trans isomerase NIMA-interacting 1 OS=Homo sapiens (Human) OX=9606 GN=PIN1 PE=1 SV=1	PIN1	0.761105	0.0449908	Yes	0.072882	No	-1.73592
P00915	>sp|P00915|CAH1_HUMAN Carbonic anhydrase 1 OS=Homo sapiens (Human) OX=9606 GN=CA1 PE=1 SV=2	CA1	2.01152	0.0452663	Yes	0.0732283	No	1.73352
E9PLD2;Q9H019;Q9H019-3	>tr|E9PLD2|E9PLD2_HUMAN Isoform of Q9H019, Mitochondrial fission regulator 1-like OS=Homo sapiens (Human) OX=9606 GN=MTFR1L PE=1 SV=1;>sp|Q9H019|MFR1L_HUMAN Mitochondrial fission regulator 1-like OS=Homo sapiens (Human) OX=9606 GN=MTFR1L PE=1 SV=2;>sp|Q9H019-3|MFR1L-3_HUMAN Isoform of Q9H019, Isoform 3 of Mitochondrial fission regulator 1-like OS=Homo sapiens (Human) OX=9606 GN=MTFR1L PE=1 SV=2	MTFR1L	0.605504	0.04537	Yes	0.0732962	No	-1.73271
O43678	>sp|O43678|NDUA2_HUMAN NADH dehydrogenase [ubiquinone] 1 alpha subcomplex subunit 2 OS=Homo sapiens (Human) OX=9606 GN=NDUFA2 PE=1 SV=3	NDUFA2	0.52837	0.0455104	Yes	0.0734232	No	-1.73146
Q5RGS4;Q9HB21;Q9HB21-2	>tr|Q5RGS4|Q5RGS4_HUMAN Isoform of Q9HB21, Pleckstrin homology domain-containing family A member 1 OS=Homo sapiens (Human) OX=9606 GN=PLEKHA1 PE=1 SV=1;>sp|Q9HB21|PKHA1_HUMAN Pleckstrin homology domain-containing family A member 1 OS=Homo sapiens (Human) OX=9606 GN=PLEKHA1 PE=1 SV=2;>sp|Q9HB21-2|PKHA1-2_HUMAN Isoform of Q9HB21, Isoform 2 of Pleckstrin homology domain-containing family A member 1 …	PLEKHA1	0.613429	0.0457175	Yes	0.0736572	No	-1.72961
E7ENY0;E7EV99;P35611;P35611-2;P35611-3;P35611-6	>tr|E7ENY0|E7ENY0_HUMAN Isoform of P35611, Aldolase_II domain-containing protein OS=Homo sapiens (Human) OX=9606 GN=ADD1 PE=1 SV=1;>tr|E7EV99|E7EV99_HUMAN Isoform of P35611, Aldolase_II domain-containing protein OS=Homo sapiens (Human) OX=9606 GN=ADD1 PE=1 SV=1;>sp|P35611|ADDA_HUMAN Alpha-adducin OS=Homo sapiens (Human) OX=9606 GN=ADD1 PE=1 SV=2;>sp|P35611-2|ADDA-2_HUMAN Isoform of P35611, Isofor…	ADD1	1.20099	0.0463067	Yes	0.0741391	No	1.72469
Q9P265	>sp|Q9P265|DIP2B_HUMAN Disco-interacting protein 2 homolog B OS=Homo sapiens (Human) OX=9606 GN=DIP2B PE=1 SV=3	DIP2B	0.813381	0.0463913	Yes	0.0741391	No	-1.72394
Q9Y6G9	>sp|Q9Y6G9|DC1L1_HUMAN Cytoplasmic dynein 1 light intermediate chain 1 OS=Homo sapiens (Human) OX=9606 GN=DYNC1LI1 PE=1 SV=3	DYNC1LI1	0.770357	0.0463846	Yes	0.0741391	No	-1.72401
Q92947	>sp|Q92947|GCDH_HUMAN Glutaryl-CoA dehydrogenase, mitochondrial OS=Homo sapiens (Human) OX=9606 GN=GCDH PE=1 SV=1	GCDH	1.35692	0.0463887	Yes	0.0741391	No	1.72397
A0A087WWW7;E9PF55;E9PGF5;Q59G71;Q9HBL0	>tr|A0A087WWW7|A0A087WWW7_HUMAN Isoform of Q9HBL0, SH2 domain-containing protein OS=Homo sapiens (Human) OX=9606 GN=TNS1 PE=1 SV=1;>tr|E9PF55|E9PF55_HUMAN Isoform of Q9HBL0, Tensin-1 OS=Homo sapiens (Human) OX=9606 GN=TNS1 PE=1 SV=1;>tr|E9PGF5|E9PGF5_HUMAN Isoform of Q9HBL0, Tensin-1 OS=Homo sapiens (Human) OX=9606 GN=TNS1 PE=1 SV=1;>tr|Q59G71|Q59G71_HUMAN Tensin variant (Fragment) OS=Homo sapien…	TNS1	2.20116	0.04626	Yes	0.0741391	No	1.72505
A0A087WTQ2;C9JGR9;E7EQ49;Q9Y2I8;Q9Y2I8-2;Q9Y2I8-3	>tr|A0A087WTQ2|A0A087WTQ2_HUMAN Isoform of Q9Y2I8, WD_REPEATS_REGION domain-containing protein OS=Homo sapiens (Human) OX=9606 GN=WDR37 PE=1 SV=1;>tr|C9JGR9|C9JGR9_HUMAN Isoform of Q9Y2I8, WD_REPEATS_REGION domain-containing protein (Fragment) OS=Homo sapiens (Human) OX=9606 GN=WDR37 PE=1 SV=1;>tr|E7EQ49|E7EQ49_HUMAN Isoform of Q9Y2I8, WD_REPEATS_REGION domain-containing protein OS=Homo sapiens (…	WDR37	0.782042	0.0461942	Yes	0.0741391	No	-1.72555
Q15714	>sp|Q15714|T22D1_HUMAN TSC22 domain family protein 1 OS=Homo sapiens (Human) OX=9606 GN=TSC22D1 PE=1 SV=3	TSC22D1	0.654734	0.0465075	Yes	0.074225	No	-1.723
P12236	>sp|P12236|ADT3_HUMAN ADP/ATP translocase 3 OS=Homo sapiens (Human) OX=9606 GN=SLC25A6 PE=1 SV=4	SLC25A6	0.843942	0.04679	Yes	0.0745756	No	-1.7207
Q13442	>sp|Q13442|HAP28_HUMAN 28 kDa heat- and acid-stable phosphoprotein OS=Homo sapiens (Human) OX=9606 GN=PDAP1 PE=1 SV=1	PDAP1	0.614555	0.0469429	Yes	0.0747191	No	-1.71945
P10114	>sp|P10114|RAP2A_HUMAN Ras-related protein Rap-2a OS=Homo sapiens (Human) OX=9606 GN=RAP2A PE=1 SV=1	RAP2A	0.835438	0.0470171	Yes	0.0747369	No	-1.71877
Q92506	>sp|Q92506|DHB8_HUMAN Estradiol 17-beta-dehydrogenase 8 OS=Homo sapiens (Human) OX=9606 GN=HSD17B8 PE=1 SV=2	HSD17B8	1.67708	0.0471983	Yes	0.0749248	No	1.71731
P10909;P10909-2;P10909-4;P10909-5	>sp|P10909|CLUS_HUMAN Clusterin OS=Homo sapiens (Human) OX=9606 GN=CLU PE=1 SV=1;>sp|P10909-2|CLUS-2_HUMAN Isoform of P10909, Isoform 2 of Clusterin OS=Homo sapiens (Human) OX=9606 GN=CLU PE=1 SV=1;>sp|P10909-4|CLUS-4_HUMAN Isoform of P10909, Isoform 4 of Clusterin OS=Homo sapiens (Human) OX=9606 GN=CLU PE=1 SV=1;>sp|P10909-5|CLUS-5_HUMAN Isoform of P10909, Isoform 5 of Clusterin OS=Homo sapiens …	CLU	1.28637	0.0477046	Yes	0.0755753	No	1.71291
Q8NF91	>sp|Q8NF91|SYNE1_HUMAN Nesprin-1 OS=Homo sapiens (Human) OX=9606 GN=SYNE1 PE=1 SV=4	SYNE1	1.27086	0.0477354	Yes	0.0755753	No	1.71266
Q01995	>sp|Q01995|TAGL_HUMAN Transgelin OS=Homo sapiens (Human) OX=9606 GN=TAGLN PE=1 SV=4	TAGLN	1.91636	0.0478425	Yes	0.0756439	No	1.71183
Q9Y6I3;Q9Y6I3-1;Q9Y6I3-3	>sp|Q9Y6I3|EPN1_HUMAN Epsin-1 OS=Homo sapiens (Human) OX=9606 GN=EPN1 PE=1 SV=2;>sp|Q9Y6I3-1|EPN1-1_HUMAN Isoform of Q9Y6I3, Isoform 2 of Epsin-1 OS=Homo sapiens (Human) OX=9606 GN=EPN1 PE=1 SV=2;>sp|Q9Y6I3-3|EPN1-3_HUMAN Isoform of Q9Y6I3, Isoform 3 of Epsin-1 OS=Homo sapiens (Human) OX=9606 GN=EPN1 PE=1 SV=2	EPN1	0.801646	0.0482163	Yes	0.0761335	No	-1.70873
Q14108	>sp|Q14108|SCRB2_HUMAN Lysosome membrane protein 2 OS=Homo sapiens (Human) OX=9606 GN=SCARB2 PE=1 SV=2	SCARB2	1.3533	0.0482975	Yes	0.0761605	No	1.70802
O75083	>sp|O75083|WDR1_HUMAN WD repeat-containing protein 1 OS=Homo sapiens (Human) OX=9606 GN=WDR1 PE=1 SV=4	WDR1	1.23479	0.0483804	Yes	0.0761901	No	1.70729
A0A087WY61;Q14980-2	>tr|A0A087WY61|A0A087WY61_HUMAN Isoform of Q14980, Nuclear mitotic apparatus protein 1 OS=Homo sapiens (Human) OX=9606 GN=NUMA1 PE=1 SV=1;>sp|Q14980-2|NUMA1-2_HUMAN Isoform of Q14980, Isoform 2 of Nuclear mitotic apparatus protein 1 OS=Homo sapiens (Human) OX=9606 GN=NUMA1 PE=1 SV=2	NUMA1	1.52335	0.04859	Yes	0.0764188	No	1.70547
Q9ULU8;Q9ULU8-4	>sp|Q9ULU8|CAPS1_HUMAN Calcium-dependent secretion activator 1 OS=Homo sapiens (Human) OX=9606 GN=CADPS PE=1 SV=3;>sp|Q9ULU8-4|CAPS1-4_HUMAN Isoform of Q9ULU8, Isoform 4 of Calcium-dependent secretion activator 1 OS=Homo sapiens (Human) OX=9606 GN=CADPS PE=1 SV=3	CADPS	0.839014	0.0488121	Yes	0.0765093	No	-1.70362
P51116	>sp|P51116|FXR2_HUMAN Fragile X mental retardation syndrome-related protein 2 OS=Homo sapiens (Human) OX=9606 GN=FXR2 PE=1 SV=2	FXR2	0.806785	0.0487504	Yes	0.0765093	No	-1.70412
E9PMB9;Q16798	>tr|E9PMB9|E9PMB9_HUMAN Isoform of Q16798, Malic enzyme (Fragment) OS=Homo sapiens (Human) OX=9606 GN=ME3 PE=1 SV=8;>sp|Q16798|MAON_HUMAN NADP-dependent malic enzyme, mitochondrial OS=Homo sapiens (Human) OX=9606 GN=ME3 PE=2 SV=2	ME3	0.765328	0.0488408	Yes	0.0765093	No	-1.70336
O75439	>sp|O75439|MPPB_HUMAN Mitochondrial-processing peptidase subunit beta OS=Homo sapiens (Human) OX=9606 GN=PMPCB PE=1 SV=2	PMPCB	0.599202	0.0490508	Yes	0.076737	No	-1.70153
P31942;P31942-2;P31942-3	>sp|P31942|HNRH3_HUMAN Heterogeneous nuclear ribonucleoprotein H3 OS=Homo sapiens (Human) OX=9606 GN=HNRNPH3 PE=1 SV=2;>sp|P31942-2|HNRH3-2_HUMAN Isoform of P31942, Isoform 2 of Heterogeneous nuclear ribonucleoprotein H3 OS=Homo sapiens (Human) OX=9606 GN=HNRNPH3 PE=1 SV=2;>sp|P31942-3|HNRH3-3_HUMAN Isoform of P31942, Isoform 3 of Heterogeneous nuclear ribonucleoprotein H3 OS=Homo sapiens (Human)…	HNRNPH3	1.19087	0.0493996	Yes	0.0771809	No	1.69862
Q12904;Q12904-2	>sp|Q12904|AIMP1_HUMAN Aminoacyl tRNA synthase complex-interacting multifunctional protein 1 OS=Homo sapiens (Human) OX=9606 GN=AIMP1 PE=1 SV=2;>sp|Q12904-2|AIMP1-2_HUMAN Isoform of Q12904, Isoform 2 of Aminoacyl tRNA synthase complex-interacting multifunctional protein 1 OS=Homo sapiens (Human) OX=9606 GN=AIMP1 PE=1 SV=2	AIMP1	0.642286	0.0495246	Yes	0.0772745	No	-1.69758
J3QTA6;J3QTB2;Q9BRQ6	>tr|J3QTA6|J3QTA6_HUMAN Isoform of Q9BRQ6, MICOS complex subunit OS=Homo sapiens (Human) OX=9606 GN=CHCHD6 PE=1 SV=1;>tr|J3QTB2|J3QTB2_HUMAN Isoform of Q9BRQ6, MICOS complex subunit OS=Homo sapiens (Human) OX=9606 GN=CHCHD6 PE=1 SV=1;>sp|Q9BRQ6|MIC25_HUMAN MICOS complex subunit MIC25 OS=Homo sapiens (Human) OX=9606 GN=CHCHD6 PE=1 SV=1	CHCHD6	0.650338	0.0500333	No	0.0777462	No	-1.69352
O60256	>sp|O60256|KPRB_HUMAN Phosphoribosyl pyrophosphate synthase-associated protein 2 OS=Homo sapiens (Human) OX=9606 GN=PRPSAP2 PE=1 SV=1	PRPSAP2	1.22638	0.04996	Yes	0.0777462	No	1.69409
P23469;P23469-2;P23469-3	>sp|P23469|PTPRE_HUMAN Receptor-type tyrosine-protein phosphatase epsilon OS=Homo sapiens (Human) OX=9606 GN=PTPRE PE=1 SV=1;>sp|P23469-2|PTPRE-2_HUMAN Isoform of P23469, Isoform 2 of Receptor-type tyrosine-protein phosphatase epsilon OS=Homo sapiens (Human) OX=9606 GN=PTPRE PE=1 SV=1;>sp|P23469-3|PTPRE-3_HUMAN Isoform of P23469, Isoform 3 of Receptor-type tyrosine-protein phosphatase epsilon OS=…	PTPRE	0.769206	0.0500763	No	0.0777462	No	-1.69314
A0A087WTB8;P15374	>tr|A0A087WTB8|A0A087WTB8_HUMAN Isoform of P15374, Ubiquitin carboxyl-terminal hydrolase OS=Homo sapiens (Human) OX=9606 GN=UCHL3 PE=1 SV=1;>sp|P15374|UCHL3_HUMAN Ubiquitin carboxyl-terminal hydrolase isozyme L3 OS=Homo sapiens (Human) OX=9606 GN=UCHL3 PE=1 SV=1	UCHL3	1.25931	0.0500888	No	0.0777462	No	1.69302
A0A087WUN7;G3V2S9;G3V4X6;H0YJ40;Q9GZT3;Q9GZT3-2	>tr|A0A087WUN7|A0A087WUN7_HUMAN Isoform of Q9GZT3, RRM domain-containing protein OS=Homo sapiens (Human) OX=9606 GN=SLIRP PE=1 SV=1;>tr|G3V2S9|G3V2S9_HUMAN Isoform of Q9GZT3, RRM domain-containing protein OS=Homo sapiens (Human) OX=9606 GN=SLIRP PE=1 SV=1;>tr|G3V4X6|G3V4X6_HUMAN Isoform of Q9GZT3, RRM domain-containing protein OS=Homo sapiens (Human) OX=9606 GN=SLIRP PE=1 SV=1;>tr|H0YJ40|H0YJ40_H…	SLIRP	0.695178	0.0503075	No	0.0779838	No	-1.69129
P48047	>sp|P48047|ATPO_HUMAN ATP synthase subunit O, mitochondrial OS=Homo sapiens (Human) OX=9606 GN=ATP5PO PE=1 SV=1	ATP5PO	0.810802	0.0504358	No	0.0780808	No	-1.69025
H3BPJ9;O96000	>tr|H3BPJ9|H3BPJ9_HUMAN Isoform of O96000, NADH dehydrogenase [ubiquinone] 1 beta subcomplex subunit 10 OS=Homo sapiens (Human) OX=9606 GN=NDUFB10 PE=1 SV=1;>sp|O96000|NDUBA_HUMAN NADH dehydrogenase [ubiquinone] 1 beta subcomplex subunit 10 OS=Homo sapiens (Human) OX=9606 GN=NDUFB10 PE=1 SV=3	NDUFB10	0.845035	0.050725	No	0.0784262	No	-1.68793
P31150	>sp|P31150|GDIA_HUMAN Rab GDP dissociation inhibitor alpha OS=Homo sapiens (Human) OX=9606 GN=GDI1 PE=1 SV=2	GDI1	1.164	0.0510275	No	0.0787075	No	1.68556
A0A0A0MRC3;A0A0A0MRR0;A0A0A0MSE6;H0Y379;H0Y382;H0Y	NA	KCNMA1	1.37203	0.0511625	No	0.0787075	No	1.6845
F5H1S8;H0YG07;Q14165	>tr|F5H1S8|F5H1S8_HUMAN Isoform of Q14165, Malectin domain-containing protein (Fragment) OS=Homo sapiens (Human) OX=9606 GN=MLEC PE=1 SV=1;>tr|H0YG07|H0YG07_HUMAN Isoform of Q14165, Malectin domain-containing protein (Fragment) OS=Homo sapiens (Human) OX=9606 GN=MLEC PE=1 SV=1;>sp|Q14165|MLEC_HUMAN Malectin OS=Homo sapiens (Human) OX=9606 GN=MLEC PE=1 SV=1	MLEC	0.834661	0.0511721	No	0.0787075	No	-1.68442
Q9BU61	>sp|Q9BU61|NDUF3_HUMAN NADH dehydrogenase [ubiquinone] 1 alpha subcomplex assembly factor 3 OS=Homo sapiens (Human) OX=9606 GN=NDUFAF3 PE=1 SV=1	NDUFAF3	0.711028	0.051155	No	0.0787075	No	-1.68458
E9PEX6;P09622;P09622-3	>tr|E9PEX6|E9PEX6_HUMAN Isoform of P09622, Dihydrolipoyl dehydrogenase OS=Homo sapiens (Human) OX=9606 GN=DLD PE=1 SV=1;>sp|P09622|DLDH_HUMAN Dihydrolipoyl dehydrogenase, mitochondrial OS=Homo sapiens (Human) OX=9606 GN=DLD PE=1 SV=2;>sp|P09622-3|DLDH-3_HUMAN Isoform of P09622, Isoform 3 of Dihydrolipoyl dehydrogenase, mitochondrial OS=Homo sapiens (Human) OX=9606 GN=DLD PE=1 SV=2	DLD	0.606452	0.0514792	No	0.0790774	No	-1.68209
B8ZZW5;Q8NBF6;Q8NBF6-2	>tr|B8ZZW5|B8ZZW5_HUMAN Isoform of Q8NBF6, UDENN domain-containing protein OS=Homo sapiens (Human) OX=9606 GN=AVL9 PE=1 SV=1;>sp|Q8NBF6|AVL9_HUMAN Late secretory pathway protein AVL9 homolog OS=Homo sapiens (Human) OX=9606 GN=AVL9 PE=1 SV=1;>sp|Q8NBF6-2|AVL9-2_HUMAN Isoform of Q8NBF6, Isoform 2 of Late secretory pathway protein AVL9 homolog OS=Homo sapiens (Human) OX=9606 GN=AVL9 PE=1 SV=1	AVL9	0.735353	0.0518479	No	0.0795409	No	-1.67915
Q9UJW0;Q9UJW0-3	>sp|Q9UJW0|DCTN4_HUMAN Dynactin subunit 4 OS=Homo sapiens (Human) OX=9606 GN=DCTN4 PE=1 SV=1;>sp|Q9UJW0-3|DCTN4-3_HUMAN Isoform of Q9UJW0, Isoform 3 of Dynactin subunit 4 OS=Homo sapiens (Human) OX=9606 GN=DCTN4 PE=1 SV=1	DCTN4	0.789239	0.05203	No	0.0797173	No	-1.67772
J3KN10	>tr|J3KN10|J3KN10_HUMAN Phosphatidylinositol 4-kinase alpha OS=Homo sapiens GN=PI4KA PE=1 SV=1	PI4KA	0.811097	0.0525354	No	0.0803879	No	-1.67371
P52306-4	>sp|P52306-4|GDS1-4_HUMAN Isoform of P52306, Isoform 4 of Rap1 GTPase-GDP dissociation stimulator 1 OS=Homo sapiens (Human) OX=9606 GN=RAP1GDS1 PE=1 SV=3	RAP1GDS1	0.826865	0.0529	No	0.0808416	No	-1.67092
P08574	>sp|P08574|CY1_HUMAN Cytochrome c1, heme protein, mitochondrial OS=Homo sapiens (Human) OX=9606 GN=CYC1 PE=1 SV=3	CYC1	0.797951	0.0531354	No	0.0809929	No	-1.66915
A0A087WXU0;Q5SZ82;Q9NWS8;Q9NWS8-2	>tr|A0A087WXU0|A0A087WXU0_HUMAN Isoform of Q9NWS8, DUF155 domain-containing protein OS=Homo sapiens (Human) OX=9606 GN=RMND1 PE=1 SV=1;>tr|Q5SZ82|Q5SZ82_HUMAN Required for meiotic nuclear division protein 1 homolog (Fragment) OS=Homo sapiens GN=RMND1 PE=1 SV=1;>sp|Q9NWS8|RMND1_HUMAN Required for meiotic nuclear division protein 1 homolog OS=Homo sapiens (Human) OX=9606 GN=RMND1 PE=1 SV=2;>sp|Q9NW…	RMND1	0.707981	0.0531075	No	0.0809929	No	-1.66938
P62310	>sp|P62310|LSM3_HUMAN U6 snRNA-associated Sm-like protein LSm3 OS=Homo sapiens (Human) OX=9606 GN=LSM3 PE=1 SV=2	LSM3	1.25975	0.0532233	No	0.0810229	No	1.66854
B8ZZL8;P61604	>tr|B8ZZL8|B8ZZL8_HUMAN Isoform of P61604, 10 kDa heat shock protein, mitochondrial OS=Homo sapiens (Human) OX=9606 GN=HSPE1 PE=1 SV=1;>sp|P61604|CH10_HUMAN 10 kDa heat shock protein, mitochondrial OS=Homo sapiens (Human) OX=9606 GN=HSPE1 PE=1 SV=2	HSPE1	0.508778	0.0535137	No	0.0813607	No	-1.66636
Q9BVA1	>sp|Q9BVA1|TBB2B_HUMAN Tubulin beta-2B chain OS=Homo sapiens (Human) OX=9606 GN=TUBB2B PE=1 SV=1	TUBB2B	1.30988	0.0540788	No	0.0821146	No	1.66223
P18124	>sp|P18124|RL7_HUMAN 60S ribosomal protein L7 OS=Homo sapiens (Human) OX=9606 GN=RPL7 PE=1 SV=1	RPL7	0.820415	0.0544942	No	0.0826397	No	-1.65923
P30153	>sp|P30153|2AAA_HUMAN Serine/threonine-protein phosphatase 2A 65 kDa regulatory subunit A alpha isoform OS=Homo sapiens (Human) OX=9606 GN=PPP2R1A PE=1 SV=4	PPP2R1A	0.823133	0.0552621	No	0.0836973	No	-1.6534
P27361	>sp|P27361|MK03_HUMAN Mitogen-activated protein kinase 3 OS=Homo sapiens (Human) OX=9606 GN=MAPK3 PE=1 SV=4	MAPK3	1.20249	0.0554275	No	0.0837342	No	1.65224
P68036;P68036-2;P68036-3	>sp|P68036|UB2L3_HUMAN Ubiquitin-conjugating enzyme E2 L3 OS=Homo sapiens (Human) OX=9606 GN=UBE2L3 PE=1 SV=1;>sp|P68036-2|UB2L3-2_HUMAN Isoform of P68036, Isoform 2 of Ubiquitin-conjugating enzyme E2 L3 OS=Homo sapiens (Human) OX=9606 GN=UBE2L3 PE=1 SV=1;>sp|P68036-3|UB2L3-3_HUMAN Isoform of P68036, Isoform 3 of Ubiquitin-conjugating enzyme E2 L3 OS=Homo sapiens (Human) OX=9606 GN=UBE2L3 PE=1 SV…	UBE2L3	1.2904	0.05538	No	0.0837342	No	1.65258
H0Y368;O60762;Q5QPK2	>tr|H0Y368|H0Y368_HUMAN Isoform of O60762, Dolichol-phosphate mannosyltransferase subunit 1 (Fragment) OS=Homo sapiens (Human) OX=9606 GN=DPM1 PE=1 SV=1;>sp|O60762|DPM1_HUMAN Dolichol-phosphate mannosyltransferase subunit 1 OS=Homo sapiens (Human) OX=9606 GN=DPM1 PE=1 SV=1;>tr|Q5QPK2|Q5QPK2_HUMAN Isoform of O60762, Dolichol-phosphate mannosyltransferase subunit 1 OS=Homo sapiens (Human) OX=9606 G…	DPM1	0.798563	0.0555192	No	0.0837661	No	-1.65155
P09669	>sp|P09669|COX6C_HUMAN Cytochrome c oxidase subunit 6C OS=Homo sapiens (Human) OX=9606 GN=COX6C PE=1 SV=2	COX6C	0.686704	0.0557633	No	0.0840278	No	-1.64983
Q9Y4G8	>sp|Q9Y4G8|RPGF2_HUMAN Rap guanine nucleotide exchange factor 2 OS=Homo sapiens (Human) OX=9606 GN=RAPGEF2 PE=1 SV=1	RAPGEF2	0.783681	0.0561933	No	0.0845684	No	-1.64685
B5MCD7;O43759;O43759-2	>tr|B5MCD7|B5MCD7_HUMAN Isoform of O43759, MARVEL domain-containing protein OS=Homo sapiens (Human) OX=9606 GN=SYNGR1 PE=1 SV=1;>sp|O43759|SNG1_HUMAN Synaptogyrin-1 OS=Homo sapiens (Human) OX=9606 GN=SYNGR1 PE=1 SV=2;>sp|O43759-2|SNG1-2_HUMAN Isoform of O43759, Isoform 1B of Synaptogyrin-1 OS=Homo sapiens (Human) OX=9606 GN=SYNGR1 PE=1 SV=2	SYNGR1	0.838029	0.0563254	No	0.0846599	No	-1.64599
Q9H0Q0	>sp|Q9H0Q0|FA49A_HUMAN Protein FAM49A OS=Homo sapiens (Human) OX=9606 GN=FAM49A PE=2 SV=1	FAM49A	0.808868	0.0567775	No	0.0850958	No	-1.64259
P09382	>sp|P09382|LEG1_HUMAN Galectin-1 OS=Homo sapiens (Human) OX=9606 GN=LGALS1 PE=1 SV=2	LGALS1	1.50115	0.0567904	No	0.0850958	No	1.64251
P09874	>sp|P09874|PARP1_HUMAN Poly [ADP-ribose] polymerase 1 OS=Homo sapiens (Human) OX=9606 GN=PARP1 PE=1 SV=4	PARP1	1.22904	0.0568304	No	0.0850958	No	1.64222
E7ENJ6;Q9BXS5;Q9BXS5-2	>tr|E7ENJ6|E7ENJ6_HUMAN Isoform of Q9BXS5, AP-1 complex subunit mu-1 OS=Homo sapiens (Human) OX=9606 GN=AP1M1 PE=1 SV=1;>sp|Q9BXS5|AP1M1_HUMAN AP-1 complex subunit mu-1 OS=Homo sapiens (Human) OX=9606 GN=AP1M1 PE=1 SV=3;>sp|Q9BXS5-2|AP1M1-2_HUMAN Isoform of Q9BXS5, Isoform 2 of AP-1 complex subunit mu-1 OS=Homo sapiens (Human) OX=9606 GN=AP1M1 PE=1 SV=3	AP1M1	0.792419	0.0569833	No	0.0852173	No	-1.64115
Q9NVI7-2	>sp|Q9NVI7-2|ATD3A-2_HUMAN Isoform of Q9NVI7, Isoform 2 of ATPase family AAA domain-containing protein 3A OS=Homo sapiens (Human) OX=9606 GN=ATAD3A PE=1 SV=2	ATAD3A	0.785584	0.0573967	No	0.0856197	No	-1.63823
E7ETY4;E9PC69;Q7KZI7;Q7KZI7-10;Q7KZI7-11;Q7KZI7-12	NA	MARK2	0.771821	0.0573529	No	0.0856197	No	-1.63853
O95433	>sp|O95433|AHSA1_HUMAN Activator of 90 kDa heat shock protein ATPase homolog 1 OS=Homo sapiens (Human) OX=9606 GN=AHSA1 PE=1 SV=1	AHSA1	0.821113	0.0578804	No	0.086233	No	-1.63484
Q9UQ03;Q9UQ03-2	>sp|Q9UQ03|COR2B_HUMAN Coronin-2B OS=Homo sapiens (Human) OX=9606 GN=CORO2B PE=1 SV=4;>sp|Q9UQ03-2|COR2B-2_HUMAN Isoform of Q9UQ03, Isoform 2 of Coronin-2B OS=Homo sapiens (Human) OX=9606 GN=CORO2B PE=2 SV=4	CORO2B	0.779173	0.0581258	No	0.0864901	No	-1.63326
P54136;P54136-2	>sp|P54136|SYRC_HUMAN Arginine--tRNA ligase, cytoplasmic OS=Homo sapiens (Human) OX=9606 GN=RARS PE=1 SV=2;>sp|P54136-2|SYRC-2_HUMAN Isoform of P54136, Isoform Monomeric of Arginine--tRNA ligase, cytoplasmic OS=Homo sapiens (Human) OX=9606 GN=RARS PE=1 SV=2	RARS	0.680686	0.0582146	No	0.0865138	No	-1.63265
A8MUM1;Q53HC9	>tr|A8MUM1|A8MUM1_HUMAN Isoform of Q53HC9, WD_REPEATS_REGION domain-containing protein OS=Homo sapiens (Human) OX=9606 GN=EIPR1 PE=1 SV=2;>sp|Q53HC9|EIPR1_HUMAN EARP and GARP complex-interacting protein 1 OS=Homo sapiens (Human) OX=9606 GN=EIPR1 PE=1 SV=2	EIPR1	0.754029	0.0583046	No	0.0865392	No	-1.63198
Q66LE6	>sp|Q66LE6|2ABD_HUMAN Serine/threonine-protein phosphatase 2A 55 kDa regulatory subunit B delta isoform OS=Homo sapiens (Human) OX=9606 GN=PPP2R2D PE=1 SV=1	PPP2R2D	0.650003	0.0584783	No	0.0865807	No	-1.63078
F2Z2T0;G3V154;Q3YEC7;Q3YEC7-2;Q3YEC7-3	>tr|F2Z2T0|F2Z2T0_HUMAN Isoform of Q3YEC7, Rab-like protein 6 OS=Homo sapiens (Human) OX=9606 GN=RABL6 PE=1 SV=1;>tr|G3V154|G3V154_HUMAN Isoform of Q3YEC7, Chromosome 9 open reading frame 86, isoform CRA_d OS=Homo sapiens (Human) OX=9606 GN=RABL6 PE=1 SV=1;>sp|Q3YEC7|RABL6_HUMAN Rab-like protein 6 OS=Homo sapiens (Human) OX=9606 GN=RABL6 PE=1 SV=2;>sp|Q3YEC7-2|RABL6-2_HUMAN Isoform of Q3YEC7, Iso…	RABL6	0.747882	0.0584408	No	0.0865807	No	-1.63105
O43236	>sp|O43236|SEPT4_HUMAN Septin-4 OS=Homo sapiens (Human) OX=9606 GN=SEPTIN4 PE=1 SV=1	SEPTIN4	0.802029	0.0587767	No	0.086914	No	-1.62866
Q96HS1	>sp|Q96HS1|PGAM5_HUMAN Serine/threonine-protein phosphatase PGAM5, mitochondrial OS=Homo sapiens (Human) OX=9606 GN=PGAM5 PE=1 SV=2	PGAM5	0.830338	0.0589138	No	0.0870083	No	-1.62767
P00918	>sp|P00918|CAH2_HUMAN Carbonic anhydrase 2 OS=Homo sapiens (Human) OX=9606 GN=CA2 PE=1 SV=2	CA2	1.69542	0.0590717	No	0.0871332	No	1.62658
A0A087WUT0;A0A0A0MQW0;A0A0A0MR39;Q9P2K5;Q9P2K5-2	>tr|A0A087WUT0|A0A087WUT0_HUMAN Isoform of Q9P2K5, Myelin expression factor 2 OS=Homo sapiens (Human) OX=9606 GN=MYEF2 PE=1 SV=1;>tr|A0A0A0MQW0|A0A0A0MQW0_HUMAN Isoform of Q9P2K5, Myelin expression factor 2 OS=Homo sapiens (Human) OX=9606 GN=MYEF2 PE=1 SV=1;>tr|A0A0A0MR39|A0A0A0MR39_HUMAN Isoform of Q9P2K5, Myelin expression factor 2 OS=Homo sapiens (Human) OX=9606 GN=MYEF2 PE=1 SV=1;>sp|Q9P2K5|M…	MYEF2	0.634221	0.0592958	No	0.0872741	No	-1.6251
Q92696	>sp|Q92696|PGTA_HUMAN Geranylgeranyl transferase type-2 subunit alpha OS=Homo sapiens (Human) OX=9606 GN=RABGGTA PE=1 SV=2	RABGGTA	0.477128	0.0593142	No	0.0872741	No	-1.62494
Q9Y4I1;Q9Y4I1-2	>sp|Q9Y4I1|MYO5A_HUMAN Unconventional myosin-Va OS=Homo sapiens (Human) OX=9606 GN=MYO5A PE=1 SV=2;>sp|Q9Y4I1-2|MYO5A-2_HUMAN Isoform of Q9Y4I1, Isoform 2 of Unconventional myosin-Va OS=Homo sapiens (Human) OX=9606 GN=MYO5A PE=1 SV=2	MYO5A	0.774905	0.0597029	No	0.0876619	No	-1.62232
P20618	>sp|P20618|PSB1_HUMAN Proteasome subunit beta type-1 OS=Homo sapiens (Human) OX=9606 GN=PSMB1 PE=1 SV=2	PSMB1	1.22509	0.0597254	No	0.0876619	No	1.62213
Q9UM19	>sp|Q9UM19|HPCL4_HUMAN Hippocalcin-like protein 4 OS=Homo sapiens (Human) OX=9606 GN=HPCAL4 PE=1 SV=3	HPCAL4	1.60355	0.0602608	No	0.0883386	No	1.61832
P17900	>sp|P17900|SAP3_HUMAN Ganglioside GM2 activator OS=Homo sapiens (Human) OX=9606 GN=GM2A PE=1 SV=4	GM2A	1.97096	0.0603525	No	0.0883639	No	1.61763
Q9BTE6-3	>sp|Q9BTE6-3|AASD1-3_HUMAN Isoform of Q9BTE6, Isoform 3 of Alanyl-tRNA editing protein Aarsd1 OS=Homo sapiens (Human) OX=9606 GN=AARSD1 PE=1 SV=2	AARSD1	0.69668	0.0604683	No	0.0884244	No	-1.61685
P55268	>sp|P55268|LAMB2_HUMAN Laminin subunit beta-2 OS=Homo sapiens (Human) OX=9606 GN=LAMB2 PE=1 SV=2	LAMB2	1.55853	0.0606808	No	0.088626	No	1.61544
P28838;P28838-2	>sp|P28838|AMPL_HUMAN Cytosol aminopeptidase OS=Homo sapiens (Human) OX=9606 GN=LAP3 PE=1 SV=3;>sp|P28838-2|AMPL-2_HUMAN Isoform of P28838, Isoform 2 of Cytosol aminopeptidase OS=Homo sapiens (Human) OX=9606 GN=LAP3 PE=1 SV=3	LAP3	1.3753	0.0618667	No	0.0900258	No	1.60769
Q96L34;Q96L34-2	>sp|Q96L34|MARK4_HUMAN MAP/microtubule affinity-regulating kinase 4 OS=Homo sapiens (Human) OX=9606 GN=MARK4 PE=1 SV=1;>sp|Q96L34-2|MARK4-2_HUMAN Isoform of Q96L34, Isoform 2 of MAP/microtubule affinity-regulating kinase 4 OS=Homo sapiens (Human) OX=9606 GN=MARK4 PE=1 SV=1	MARK4	0.652758	0.0617562	No	0.0900258	No	-1.60837
Q9HBL7	>sp|Q9HBL7|PLRKT_HUMAN Plasminogen receptor (KT) OS=Homo sapiens (Human) OX=9606 GN=PLGRKT PE=1 SV=1	PLGRKT	1.34283	0.0617929	No	0.0900258	No	1.60818
D6R9C3;D6RGV5;D6RIE3;H0UI06;P14406	>tr|D6R9C3|D6R9C3_HUMAN Isoform of P14406, Cytochrome c oxidase subunit 7A2, mitochondrial OS=Homo sapiens (Human) OX=9606 GN=COX7A2 PE=1 SV=1;>tr|D6RGV5|D6RGV5_HUMAN Isoform of P14406, Cytochrome c oxidase subunit 7A2, mitochondrial (Fragment) OS=Homo sapiens (Human) OX=9606 GN=COX7A2 PE=1 SV=1;>tr|D6RIE3|D6RIE3_HUMAN Isoform of P14406, Cytochrome c oxidase subunit 7A2, mitochondrial OS=Homo sap…	COX7A2	0.352125	0.0624625	No	0.0906706	No	-1.60371
P17600	>sp|P17600|SYN1_HUMAN Synapsin-1 OS=Homo sapiens (Human) OX=9606 GN=SYN1 PE=1 SV=3	SYN1	1.3475	0.0623954	No	0.0906706	No	1.60412
Q9Y4W6	>sp|Q9Y4W6|AFG32_HUMAN AFG3-like protein 2 OS=Homo sapiens (Human) OX=9606 GN=AFG3L2 PE=1 SV=2	AFG3L2	0.797528	0.0628083	No	0.090872	No	-1.60141
Q15029;Q15029-2;Q15029-3	>sp|Q15029|U5S1_HUMAN 116 kDa U5 small nuclear ribonucleoprotein component OS=Homo sapiens (Human) OX=9606 GN=EFTUD2 PE=1 SV=1;>sp|Q15029-2|U5S1-2_HUMAN Isoform of Q15029, Isoform 2 of 116 kDa U5 small nuclear ribonucleoprotein component OS=Homo sapiens (Human) OX=9606 GN=EFTUD2 PE=1 SV=1;>sp|Q15029-3|U5S1-3_HUMAN Isoform of Q15029, Isoform 3 of 116 kDa U5 small nuclear ribonucleoprotein componen…	EFTUD2	1.35962	0.0629221	No	0.090872	No	1.6007
B7ZL14;Q96RU3;Q96RU3-2;Q96RU3-3;Q96RU3-4;Q96RU3-5	>tr|B7ZL14|B7ZL14_HUMAN Isoform of Q96RU3, FNBP1 protein OS=Homo sapiens (Human) OX=9606 GN=FNBP1 PE=1 SV=1;>sp|Q96RU3|FNBP1_HUMAN Formin-binding protein 1 OS=Homo sapiens (Human) OX=9606 GN=FNBP1 PE=1 SV=2;>sp|Q96RU3-2|FNBP1-2_HUMAN Isoform of Q96RU3, Isoform 2 of Formin-binding protein 1 OS=Homo sapiens (Human) OX=9606 GN=FNBP1 PE=1 SV=2;>sp|Q96RU3-3|FNBP1-3_HUMAN Isoform of Q96RU3, Isoform 3 o…	FNBP1	1.44079	0.0627338	No	0.090872	No	1.60194
O43301	>sp|O43301|HS12A_HUMAN Heat shock 70 kDa protein 12A OS=Homo sapiens (Human) OX=9606 GN=HSPA12A PE=1 SV=2	HSPA12A	0.788415	0.0630604	No	0.090872	No	-1.59989
P11047	>sp|P11047|LAMC1_HUMAN Laminin subunit gamma-1 OS=Homo sapiens (Human) OX=9606 GN=LAMC1 PE=1 SV=3	LAMC1	1.56645	0.0630183	No	0.090872	No	1.60014
Q9HCJ6	>sp|Q9HCJ6|VAT1L_HUMAN Synaptic vesicle membrane protein VAT-1 homolog-like OS=Homo sapiens (Human) OX=9606 GN=VAT1L PE=1 SV=2	VAT1L	1.22971	0.0628571	No	0.090872	No	1.60107
J9JID7;Q03252	>tr|J9JID7|J9JID7_HUMAN Lamin B2, isoform CRA_a OS=Homo sapiens GN=LMNB2 PE=3 SV=1;>sp|Q03252|LMNB2_HUMAN Lamin-B2 OS=Homo sapiens (Human) OX=9606 GN=LMNB2 PE=1 SV=4	LMNB2	1.18317	0.0633754	No	0.0911509	No	1.59784
Q8NCW5;Q8NCW5-2	>sp|Q8NCW5|NNRE_HUMAN NAD(P)H-hydrate epimerase OS=Homo sapiens (Human) OX=9606 GN=NAXE PE=1 SV=2;>sp|Q8NCW5-2|NNRE-2_HUMAN Isoform of Q8NCW5, Isoform 2 of NAD(P)H-hydrate epimerase OS=Homo sapiens (Human) OX=9606 GN=NAXE PE=1 SV=2	NAXE	1.23462	0.0634075	No	0.0911509	No	1.59765
P30086	>sp|P30086|PEBP1_HUMAN Phosphatidylethanolamine-binding protein 1 OS=Homo sapiens (Human) OX=9606 GN=PEBP1 PE=1 SV=3	PEBP1	1.44203	0.0635933	No	0.0913075	No	1.5965
P26012;P26012-2	>sp|P26012|ITB8_HUMAN Integrin beta-8 OS=Homo sapiens (Human) OX=9606 GN=ITGB8 PE=1 SV=1;>sp|P26012-2|ITB8-2_HUMAN Isoform of P26012, Isoform 2 of Integrin beta-8 OS=Homo sapiens (Human) OX=9606 GN=ITGB8 PE=1 SV=1	ITGB8	1.33659	0.0638575	No	0.091576	No	1.59473
P61586	>sp|P61586|RHOA_HUMAN Transforming protein RhoA OS=Homo sapiens (Human) OX=9606 GN=RHOA PE=1 SV=1	RHOA	2.4582	0.0640279	No	0.0917097	No	1.59363
P07339	>sp|P07339|CATD_HUMAN Cathepsin D OS=Homo sapiens (Human) OX=9606 GN=CTSD PE=1 SV=1	CTSD	1.25034	0.0643079	No	0.0919997	No	1.59182
Q9NTJ5	>sp|Q9NTJ5|SAC1_HUMAN Phosphatidylinositide phosphatase SAC1 OS=Homo sapiens (Human) OX=9606 GN=SACM1L PE=1 SV=2	SACM1L	1.2744	0.0645021	No	0.0921665	No	1.59058
O15400;O15400-2	>sp|O15400|STX7_HUMAN Syntaxin-7 OS=Homo sapiens (Human) OX=9606 GN=STX7 PE=1 SV=4;>sp|O15400-2|STX7-2_HUMAN Isoform of O15400, Isoform 2 of Syntaxin-7 OS=Homo sapiens (Human) OX=9606 GN=STX7 PE=1 SV=4	STX7	0.829003	0.0646971	No	0.092334	No	-1.5894
H7C3P7	>tr|H7C3P7|H7C3P7_HUMAN Isoform of P11233, Ras-related protein Ral-A (Fragment) OS=Homo sapiens (Human) OX=9606 GN=RALA PE=1 SV=1	RALA	0.85518	0.0648692	No	0.0924684	No	-1.58827
Q9HAB8	>sp|Q9HAB8|PPCS_HUMAN Phosphopantothenate--cysteine ligase OS=Homo sapiens (Human) OX=9606 GN=PPCS PE=1 SV=2	PPCS	2.00818	0.0650292	No	0.0925854	No	1.58733
Q8NHG7	>sp|Q8NHG7|SVIP_HUMAN Small VCP/p97-interacting protein OS=Homo sapiens (Human) OX=9606 GN=SVIP PE=1 SV=1	SVIP	0.677283	0.0651633	No	0.0926653	No	-1.58655
P01024	>sp|P01024|CO3_HUMAN Complement C3 OS=Homo sapiens (Human) OX=9606 GN=C3 PE=1 SV=2	C3	1.29522	0.06585	No	0.0935297	No	1.58223
P24386	>sp|P24386|RAE1_HUMAN Rab proteins geranylgeranyltransferase component A 1 OS=Homo sapiens (Human) OX=9606 GN=CHM PE=1 SV=3	CHM	0.776875	0.0663846	No	0.0941764	No	-1.57889
P17931	>sp|P17931|LEG3_HUMAN Galectin-3 OS=Homo sapiens (Human) OX=9606 GN=LGALS3 PE=1 SV=5	LGALS3	2.01237	0.0665167	No	0.0942512	No	1.57803
D6REX3;O94979;O94979-10;O94979-2;O94979-3;O94979-4	NA	SEC31A	0.8452	0.0667929	No	0.0945298	No	-1.57628
P09543;P09543-2	>sp|P09543|CN37_HUMAN 2',3'-cyclic-nucleotide 3'-phosphodiesterase OS=Homo sapiens (Human) OX=9606 GN=CNP PE=1 SV=2;>sp|P09543-2|CN37-2_HUMAN Isoform of P09543, Isoform CNPI of 2',3'-cyclic-nucleotide 3'-phosphodiesterase OS=Homo sapiens (Human) OX=9606 GN=CNP PE=1 SV=2	CNP	0.662972	0.0673275	No	0.0948777	No	-1.57298
E7EUU4;E7EX73;E9PGM1;Q04637;Q04637-3;Q04637-4;Q046	NA	EIF4G1	0.670937	0.0673583	No	0.0948777	No	-1.57281
A0A087X0R6;Q9UMY4;Q9UMY4-2	>tr|A0A087X0R6|A0A087X0R6_HUMAN Isoform of Q9UMY4, PX domain-containing protein OS=Homo sapiens (Human) OX=9606 GN=SNX12 PE=1 SV=1;>sp|Q9UMY4|SNX12_HUMAN Sorting nexin-12 OS=Homo sapiens (Human) OX=9606 GN=SNX12 PE=1 SV=4;>sp|Q9UMY4-2|SNX12_HUMAN Isoform 2 of Sorting nexin-12 OS=Homo sapiens GN=SNX12	SNX12	1.21846	0.0672404	No	0.0948777	No	1.57357
P35270	>sp|P35270|SPRE_HUMAN Sepiapterin reductase OS=Homo sapiens (Human) OX=9606 GN=SPR PE=1 SV=1	SPR	1.38615	0.0673071	No	0.0948777	No	1.57312
A0A087WZV1;D6R9P3;D6RBZ0;D6RD18;Q99729-2;Q99729-3	>tr|A0A087WZV1|A0A087WZV1_HUMAN Heterogeneous nuclear ribonucleoprotein A/B OS=Homo sapiens GN=HNRNPAB PE=1 SV=1;>tr|D6R9P3|D6R9P3_HUMAN Isoform of Q99729, Heterogeneous nuclear ribonucleoprotein A/B OS=Homo sapiens (Human) OX=9606 GN=HNRNPAB PE=1 SV=1;>tr|D6RBZ0|D6RBZ0_HUMAN Isoform of Q99729, Heterogeneous nuclear ribonucleoprotein A/B OS=Homo sapiens (Human) OX=9606 GN=HNRNPAB PE=1 SV=1;>tr|D6…	HNRNPAB	0.669468	0.0677333	No	0.0952928	No	-1.57064
Q99767;Q99767-2	>sp|Q99767|APBA2_HUMAN Amyloid-beta A4 precursor protein-binding family A member 2 OS=Homo sapiens (Human) OX=9606 GN=APBA2 PE=1 SV=3;>sp|Q99767-2|APBA2-2_HUMAN Isoform of Q99767, Isoform 2 of Amyloid-beta A4 precursor protein-binding family A member 2 OS=Homo sapiens (Human) OX=9606 GN=APBA2 PE=1 SV=3	APBA2	0.621336	0.06784	No	0.09533	No	-1.56997
Q02246	>sp|Q02246|CNTN2_HUMAN Contactin-2 OS=Homo sapiens (Human) OX=9606 GN=CNTN2 PE=1 SV=1	CNTN2	0.800123	0.0679763	No	0.0954085	No	-1.56916
Q02750;Q02750-2	>sp|Q02750|MP2K1_HUMAN Dual specificity mitogen-activated protein kinase kinase 1 OS=Homo sapiens (Human) OX=9606 GN=MAP2K1 PE=1 SV=2;>sp|Q02750-2|MP2K1-2_HUMAN Isoform of Q02750, Isoform 2 of Dual specificity mitogen-activated protein kinase kinase 1 OS=Homo sapiens (Human) OX=9606 GN=MAP2K1 PE=1 SV=2	MAP2K1	0.785602	0.0682087	No	0.0954799	No	-1.56782
B7Z6Z4;F8W1R7;G3V1V0;G8JLA2;J3KND3;P60660;P60660-2	>tr|B7Z6Z4|B7Z6Z4_HUMAN Isoform of P60660, Myosin light polypeptide 6 OS=Homo sapiens (Human) OX=9606 GN=MYL6 PE=1 SV=1;>tr|F8W1R7|F8W1R7_HUMAN Isoform of P60660, Myosin light polypeptide 6 OS=Homo sapiens (Human) OX=9606 GN=MYL6 PE=1 SV=1;>tr|G3V1V0|G3V1V0_HUMAN Isoform of P60660, Myosin light polypeptide 6 OS=Homo sapiens (Human) OX=9606 GN=MYL6 PE=1 SV=1;>tr|G8JLA2|G8JLA2_HUMAN Isoform of P606…	MYL6	1.27624	0.0682037	No	0.0954799	No	1.56783
Q9Y266	>sp|Q9Y266|NUDC_HUMAN Nuclear migration protein nudC OS=Homo sapiens (Human) OX=9606 GN=NUDC PE=1 SV=1	NUDC	0.776557	0.0683487	No	0.0954799	No	-1.56696
H0YJX6;O14744;O14744-2;O14744-3;O14744-5	>tr|H0YJX6|H0YJX6_HUMAN Isoform of O14744, Protein arginine N-methyltransferase 5 (Fragment) OS=Homo sapiens (Human) OX=9606 GN=PRMT5 PE=1 SV=1;>sp|O14744|ANM5_HUMAN Protein arginine N-methyltransferase 5 OS=Homo sapiens (Human) OX=9606 GN=PRMT5 PE=1 SV=4;>sp|O14744-2|ANM5-2_HUMAN Isoform of O14744, Isoform 2 of Protein arginine N-methyltransferase 5 OS=Homo sapiens (Human) OX=9606 GN=PRMT5 PE=1 …	PRMT5	1.32233	0.0683021	No	0.0954799	No	1.56728
Q8N608;Q8N608-2;Q8N608-3;Q8N608-4	>sp|Q8N608|DPP10_HUMAN Inactive dipeptidyl peptidase 10 OS=Homo sapiens (Human) OX=9606 GN=DPP10 PE=1 SV=2;>sp|Q8N608-2|DPP10-2_HUMAN Isoform of Q8N608, Isoform 2 of Inactive dipeptidyl peptidase 10 OS=Homo sapiens (Human) OX=9606 GN=DPP10 PE=1 SV=2;>sp|Q8N608-3|DPP10-3_HUMAN Isoform of Q8N608, Isoform 3 of Inactive dipeptidyl peptidase 10 OS=Homo sapiens (Human) OX=9606 GN=DPP10 PE=1 SV=2;>sp|Q8…	DPP10	1.22538	0.0685117	No	0.0954846	No	1.56601
Q15814	>sp|Q15814|TBCC_HUMAN Tubulin-specific chaperone C OS=Homo sapiens (Human) OX=9606 GN=TBCC PE=1 SV=2	TBCC	0.798105	0.0685129	No	0.0954846	No	-1.566
P54750;P54750-2;P54750-4;P54750-5;P54750-6;P54750-	NA	PDE1A	0.849132	0.0687025	No	0.0956365	No	-1.56491
P10599	>sp|P10599|THIO_HUMAN Thioredoxin OS=Homo sapiens (Human) OX=9606 GN=TXN PE=1 SV=3	TXN	0.71044	0.0691092	No	0.09609	No	-1.56256
P62166	>sp|P62166|NCS1_HUMAN Neuronal calcium sensor 1 OS=Homo sapiens (Human) OX=9606 GN=NCS1 PE=1 SV=2	NCS1	0.746001	0.0694675	No	0.0964515	No	-1.56036
Q9UHG2	>sp|Q9UHG2|PCS1N_HUMAN ProSAAS OS=Homo sapiens (Human) OX=9606 GN=PCSK1N PE=1 SV=1	PCSK1N	0.522281	0.0695317	No	0.0964515	No	-1.55994
O95831;O95831-3	>sp|O95831|AIFM1_HUMAN Apoptosis-inducing factor 1, mitochondrial OS=Homo sapiens (Human) OX=9606 GN=AIFM1 PE=1 SV=1;>sp|O95831-3|AIFM1-3_HUMAN Isoform of O95831, Isoform 3 of Apoptosis-inducing factor 1, mitochondrial OS=Homo sapiens (Human) OX=9606 GN=AIFM1 PE=1 SV=1	AIFM1	0.802865	0.0697842	No	0.0966413	No	-1.5585
G5E9A6;P51784	>tr|G5E9A6|G5E9A6_HUMAN Isoform of P51784, Ubiquitin carboxyl-terminal hydrolase OS=Homo sapiens (Human) OX=9606 GN=USP11 PE=1 SV=1;>sp|P51784|UBP11_HUMAN Ubiquitin carboxyl-terminal hydrolase 11 OS=Homo sapiens (Human) OX=9606 GN=USP11 PE=1 SV=3	USP11	0.74527	0.0698312	No	0.0966413	No	-1.55824
A0A087WZR6;A0A087WZW4;A0A087X0T8;A0A087X105;A0A087	NA	CADM1	0.81735	0.0699958	No	0.0967563	No	-1.55726
P30740	>sp|P30740|ILEU_HUMAN Leukocyte elastase inhibitor OS=Homo sapiens (Human) OX=9606 GN=SERPINB1 PE=1 SV=1	SERPINB1	1.79582	0.0701263	No	0.0968239	No	1.55645
P21912	>sp|P21912|SDHB_HUMAN Succinate dehydrogenase [ubiquinone] iron-sulfur subunit, mitochondrial OS=Homo sapiens (Human) OX=9606 GN=SDHB PE=1 SV=3	SDHB	0.805561	0.0704742	No	0.096966	No	-1.55443
P53007	>sp|P53007|TXTP_HUMAN Tricarboxylate transport protein, mitochondrial OS=Homo sapiens (Human) OX=9606 GN=SLC25A1 PE=1 SV=2	SLC25A1	1.31941	0.0704029	No	0.096966	No	1.55484
Q9BUB7	>sp|Q9BUB7|TMM70_HUMAN Transmembrane protein 70, mitochondrial OS=Homo sapiens (Human) OX=9606 GN=TMEM70 PE=1 SV=2	TMEM70	0.774397	0.0703717	No	0.096966	No	-1.55503
K7ELG9;Q3MHD2;Q3MHD2-2	>tr|K7ELG9|K7ELG9_HUMAN Isoform of Q3MHD2, AD domain-containing protein OS=Homo sapiens (Human) OX=9606 GN=LSM12 PE=1 SV=1;>sp|Q3MHD2|LSM12_HUMAN Protein LSM12 homolog OS=Homo sapiens (Human) OX=9606 GN=LSM12 PE=1 SV=2;>sp|Q3MHD2-2|LSM12-2_HUMAN Isoform of Q3MHD2, Isoform 2 of Protein LSM12 homolog OS=Homo sapiens (Human) OX=9606 GN=LSM12 PE=1 SV=2	LSM12	0.424495	0.0708467	No	0.0972806	No	-1.55223
Q08AM6	>sp|Q08AM6|VAC14_HUMAN Protein VAC14 homolog OS=Homo sapiens (Human) OX=9606 GN=VAC14 PE=1 SV=1	VAC14	0.801282	0.0708667	No	0.0972806	No	-1.55209
Q9UBC2;Q9UBC2-2;Q9UBC2-3	>sp|Q9UBC2|EP15R_HUMAN Epidermal growth factor receptor substrate 15-like 1 OS=Homo sapiens (Human) OX=9606 GN=EPS15L1 PE=1 SV=1;>sp|Q9UBC2-2|EP15R-2_HUMAN Isoform of Q9UBC2, Isoform 2 of Epidermal growth factor receptor substrate 15-like 1 OS=Homo sapiens (Human) OX=9606 GN=EPS15L1 PE=1 SV=1;>sp|Q9UBC2-3|EP15R-3_HUMAN Isoform of Q9UBC2, Isoform 3 of Epidermal growth factor receptor substrate 15-…	EPS15L1	0.846373	0.0709692	No	0.0973088	No	-1.55145
Q08752	>sp|Q08752|PPID_HUMAN Peptidyl-prolyl cis-trans isomerase D OS=Homo sapiens (Human) OX=9606 GN=PPID PE=1 SV=3	PPID	0.787269	0.07114	No	0.0973183	No	-1.5505
Q99962	>sp|Q99962|SH3G2_HUMAN Endophilin-A1 OS=Homo sapiens (Human) OX=9606 GN=SH3GL2 PE=1 SV=1	SH3GL2	0.838846	0.0710675	No	0.0973183	No	-1.55092
P23786	>sp|P23786|CPT2_HUMAN Carnitine O-palmitoyltransferase 2, mitochondrial OS=Homo sapiens (Human) OX=9606 GN=CPT2 PE=1 SV=2	CPT2	1.45998	0.0713733	No	0.0975251	No	1.54921
Q9UQ16;Q9UQ16-2;Q9UQ16-3;Q9UQ16-4	>sp|Q9UQ16|DYN3_HUMAN Dynamin-3 OS=Homo sapiens (Human) OX=9606 GN=DNM3 PE=1 SV=4;>sp|Q9UQ16-2|DYN3-2_HUMAN Isoform of Q9UQ16, Isoform 2 of Dynamin-3 OS=Homo sapiens (Human) OX=9606 GN=DNM3 PE=1 SV=4;>sp|Q9UQ16-3|DYN3-3_HUMAN Isoform of Q9UQ16, Isoform 3 of Dynamin-3 OS=Homo sapiens (Human) OX=9606 GN=DNM3 PE=1 SV=4;>sp|Q9UQ16-4|DYN3-4_HUMAN Isoform of Q9UQ16, Isoform 4 of Dynamin-3 OS=Homo sapie…	DNM3	0.843867	0.0716008	No	0.0977235	No	-1.5479
P49755	>sp|P49755|TMEDA_HUMAN Transmembrane emp24 domain-containing protein 10 OS=Homo sapiens (Human) OX=9606 GN=TMED10 PE=1 SV=2	TMED10	1.27212	0.0717342	No	0.0977931	No	1.54706
O94772;O94772-2	>sp|O94772|LY6H_HUMAN Lymphocyte antigen 6H OS=Homo sapiens (Human) OX=9606 GN=LY6H PE=1 SV=1;>sp|O94772-2|LY6H-2_HUMAN Isoform of O94772, Isoform 2 of Lymphocyte antigen 6H OS=Homo sapiens (Human) OX=9606 GN=LY6H PE=2 SV=1	LY6H	2.17169	0.0718546	No	0.0978449	No	1.54639
P49419-2	>sp|P49419-2|AL7A1-2_HUMAN Isoform of P49419, Isoform 2 of Alpha-aminoadipic semialdehyde dehydrogenase OS=Homo sapiens (Human) OX=9606 GN=ALDH7A1 PE=1 SV=5	ALDH7A1	1.44256	0.0720212	No	0.0979595	No	1.54539
Q9H0Q3	>sp|Q9H0Q3|FXYD6_HUMAN FXYD domain-containing ion transport regulator 6 OS=Homo sapiens (Human) OX=9606 GN=FXYD6 PE=1 SV=1	FXYD6	0.804921	0.0721896	No	0.0980761	No	-1.54441
Q96JG6;Q96JG6-3	>sp|Q96JG6|VPS50_HUMAN Syndetin OS=Homo sapiens (Human) OX=9606 GN=VPS50 PE=1 SV=3;>sp|Q96JG6-3|VPS50-3_HUMAN Isoform of Q96JG6, Isoform 3 of Syndetin OS=Homo sapiens (Human) OX=9606 GN=VPS50 PE=1 SV=3	VPS50	0.748349	0.0725629	No	0.0984707	No	-1.54235
E7EWP0;H0Y886;O43674;O43674-2	>tr|E7EWP0|E7EWP0_HUMAN Isoform of O43674, NADH dehydrogenase [ubiquinone] 1 beta subcomplex subunit 5, mitochondrial OS=Homo sapiens (Human) OX=9606 GN=NDUFB5 PE=1 SV=1;>tr|H0Y886|H0Y886_HUMAN Isoform of O43674, NADH dehydrogenase [ubiquinone] 1 beta subcomplex subunit 5, mitochondrial (Fragment) OS=Homo sapiens (Human) OX=9606 GN=NDUFB5 PE=1 SV=1;>sp|O43674|NDUB5_HUMAN NADH dehydrogenase [ubiqu…	NDUFB5	0.799963	0.0729125	No	0.0988321	No	-1.54036
Q9NZQ3;Q9NZQ3-3	>sp|Q9NZQ3|SPN90_HUMAN NCK-interacting protein with SH3 domain OS=Homo sapiens (Human) OX=9606 GN=NCKIPSD PE=1 SV=1;>sp|Q9NZQ3-3|SPN90-3_HUMAN Isoform of Q9NZQ3, Isoform 3 of NCK-interacting protein with SH3 domain OS=Homo sapiens (Human) OX=9606 GN=NCKIPSD PE=1 SV=1	NCKIPSD	0.690155	0.0732692	No	0.0992023	No	-1.5384
O95182	>sp|O95182|NDUA7_HUMAN NADH dehydrogenase [ubiquinone] 1 alpha subcomplex subunit 7 OS=Homo sapiens (Human) OX=9606 GN=NDUFA7 PE=1 SV=3	NDUFA7	0.675616	0.0733792	No	0.0992381	No	-1.53775
Q6NZI2	>sp|Q6NZI2|CAVN1_HUMAN Caveolae-associated protein 1 OS=Homo sapiens (Human) OX=9606 GN=CAVIN1 PE=1 SV=1	CAVIN1	1.31671	0.0738079	No	0.0994158	No	1.53533
P04899	>sp|P04899|GNAI2_HUMAN Guanine nucleotide-binding protein G(i) subunit alpha-2 OS=Homo sapiens (Human) OX=9606 GN=GNAI2 PE=1 SV=3	GNAI2	1.30082	0.0736783	No	0.0994158	No	1.53602
F5GZS6;J3KPF3;P08195;P08195-2;P08195-3;P08195-4	>tr|F5GZS6|F5GZS6_HUMAN Isoform of P08195, Aamy domain-containing protein OS=Homo sapiens (Human) OX=9606 GN=SLC3A2 PE=1 SV=1;>tr|J3KPF3|J3KPF3_HUMAN Isoform of P08195, Aamy domain-containing protein OS=Homo sapiens (Human) OX=9606 GN=SLC3A2 PE=1 SV=1;>sp|P08195|4F2_HUMAN 4F2 cell-surface antigen heavy chain OS=Homo sapiens (Human) OX=9606 GN=SLC3A2 PE=1 SV=3;>sp|P08195-2|4F2-2_HUMAN Isoform of P…	SLC3A2	1.22028	0.0738454	No	0.0994158	No	1.5351
Q9BZV1;Q9BZV1-2	>sp|Q9BZV1|UBXN6_HUMAN UBX domain-containing protein 6 OS=Homo sapiens (Human) OX=9606 GN=UBXN6 PE=1 SV=1;>sp|Q9BZV1-2|UBXN6-2_HUMAN Isoform of Q9BZV1, Isoform 2 of UBX domain-containing protein 6 OS=Homo sapiens (Human) OX=9606 GN=UBXN6 PE=1 SV=1	UBXN6	0.692608	0.0737238	No	0.0994158	No	-1.53577
P02462;P02462-2	>sp|P02462|CO4A1_HUMAN Collagen alpha-1(IV) chain OS=Homo sapiens (Human) OX=9606 GN=COL4A1 PE=1 SV=4;>sp|P02462-2|CO4A1-2_HUMAN Isoform of P02462, Isoform 2 of Collagen alpha-1(IV) chain OS=Homo sapiens (Human) OX=9606 GN=COL4A1 PE=1 SV=4	COL4A1	3.62977	0.0749925	No	0.100058	No	1.52877
Q9UBR2	>sp|Q9UBR2|CATZ_HUMAN Cathepsin Z OS=Homo sapiens (Human) OX=9606 GN=CTSZ PE=1 SV=1	CTSZ	1.5197	0.0748942	No	0.100058	No	1.52936
I3L397;I3L504;P63241;P63241-2	>tr|I3L397|I3L397_HUMAN Isoform of P63241, Eukaryotic translation initiation factor 5A (Fragment) OS=Homo sapiens (Human) OX=9606 GN=EIF5A PE=1 SV=8;>tr|I3L504|I3L504_HUMAN Isoform of P63241, eIF-5a domain-containing protein OS=Homo sapiens (Human) OX=9606 GN=EIF5A PE=1 SV=1;>sp|P63241|IF5A1_HUMAN Eukaryotic translation initiation factor 5A-1 OS=Homo sapiens (Human) OX=9606 GN=EIF5A PE=1 SV=2;>sp…	EIF5A	0.679226	0.0749758	No	0.100058	No	-1.52886
P45983;P45983-2	>sp|P45983|MK08_HUMAN Mitogen-activated protein kinase 8 OS=Homo sapiens (Human) OX=9606 GN=MAPK8 PE=1 SV=2;>sp|P45983-2|MK08-2_HUMAN Isoform of P45983, Isoform 1 of Mitogen-activated protein kinase 8 OS=Homo sapiens (Human) OX=9606 GN=MAPK8 PE=1 SV=2	MAPK8	0.782978	0.0744121	No	0.100058	No	-1.53204
H7BYW5;P31321	>tr|H7BYW5|H7BYW5_HUMAN Isoform of P31321, cAMP-dependent protein kinase type I-beta regulatory subunit (Fragment) OS=Homo sapiens (Human) OX=9606 GN=PRKAR1B PE=1 SV=1;>sp|P31321|KAP1_HUMAN cAMP-dependent protein kinase type I-beta regulatory subunit OS=Homo sapiens (Human) OX=9606 GN=PRKAR1B PE=1 SV=4	PRKAR1B	0.701339	0.0749963	No	0.100058	No	-1.52875
K7ELW1;K7ENJ0;P54725;P54725-2;P54725-3	>tr|K7ELW1|K7ELW1_HUMAN Isoform of P54725, Ubiquitin-like domain-containing protein OS=Homo sapiens (Human) OX=9606 GN=RAD23A PE=1 SV=1;>tr|K7ENJ0|K7ENJ0_HUMAN Isoform of P54725, Ubiquitin-like domain-containing protein OS=Homo sapiens (Human) OX=9606 GN=RAD23A PE=1 SV=1;>sp|P54725|RD23A_HUMAN UV excision repair protein RAD23 homolog A OS=Homo sapiens (Human) OX=9606 GN=RAD23A PE=1 SV=1;>sp|P5472…	RAD23A	0.766099	0.0746642	No	0.100058	No	-1.53065
A0A024QZX5;A0A087X1N8;P35237	>tr|A0A024QZX5|A0A024QZX5_HUMAN Isoform of P35237, SERPIN domain-containing protein OS=Homo sapiens (Human) OX=9606 GN=SERPINB6 PE=1 SV=1;>tr|A0A087X1N8|A0A087X1N8_HUMAN Isoform of P35237, SERPIN domain-containing protein OS=Homo sapiens (Human) OX=9606 GN=SERPINB6 PE=1 SV=1;>sp|P35237|SPB6_HUMAN Serpin B6 OS=Homo sapiens (Human) OX=9606 GN=SERPINB6 PE=1 SV=3	SERPINB6	1.44844	0.0749854	No	0.100058	No	1.52881
Q66K14;Q66K14-2	>sp|Q66K14|TBC9B_HUMAN TBC1 domain family member 9B OS=Homo sapiens (Human) OX=9606 GN=TBC1D9B PE=1 SV=3;>sp|Q66K14-2|TBC9B-2_HUMAN Isoform of Q66K14, Isoform 2 of TBC1 domain family member 9B OS=Homo sapiens (Human) OX=9606 GN=TBC1D9B PE=1 SV=3	TBC1D9B	1.30755	0.074565	No	0.100058	No	1.5312
Q9Y6K8;Q9Y6K8-3	>sp|Q9Y6K8|KAD5_HUMAN Adenylate kinase isoenzyme 5 OS=Homo sapiens (Human) OX=9606 GN=AK5 PE=1 SV=2;>sp|Q9Y6K8-3|KAD5-3_HUMAN Isoform of Q9Y6K8, Isoform 3 of Adenylate kinase isoenzyme 5 OS=Homo sapiens (Human) OX=9606 GN=AK5 PE=1 SV=2	AK5	0.787567	0.0753046	No	0.100356	No	-1.52693
Q9C0D0	>sp|Q9C0D0|PHAR1_HUMAN Phosphatase and actin regulator 1 OS=Homo sapiens (Human) OX=9606 GN=PHACTR1 PE=1 SV=3	PHACTR1	0.74446	0.0754467	No	0.100433	No	-1.52609
Q8N126;Q8N126-2	>sp|Q8N126|CADM3_HUMAN Cell adhesion molecule 3 OS=Homo sapiens (Human) OX=9606 GN=CADM3 PE=1 SV=1;>sp|Q8N126-2|CADM3-2_HUMAN Isoform of Q8N126, Isoform 2 of Cell adhesion molecule 3 OS=Homo sapiens (Human) OX=9606 GN=CADM3 PE=1 SV=1	CADM3	0.771547	0.075535	No	0.100438	No	-1.52556
O15075	>sp|O15075|DCLK1_HUMAN Serine/threonine-protein kinase DCLK1 OS=Homo sapiens (Human) OX=9606 GN=DCLK1 PE=1 SV=2	DCLK1	0.788945	0.0758729	No	0.100774	No	-1.52384
P45954;P45954-2	>sp|P45954|ACDSB_HUMAN Short/branched chain specific acyl-CoA dehydrogenase, mitochondrial OS=Homo sapiens (Human) OX=9606 GN=ACADSB PE=1 SV=1;>sp|P45954-2|ACDSB-2_HUMAN Isoform of P45954, Isoform 2 of Short/branched chain specific acyl-CoA dehydrogenase, mitochondrial OS=Homo sapiens (Human) OX=9606 GN=ACADSB PE=1 SV=1	ACADSB	1.50213	0.0768	No	0.101892	No	1.51865
F2Z2J1;Q15349-2;Q15349-3	>tr|F2Z2J1|F2Z2J1_HUMAN Isoform of Q15349, Ribosomal protein S6 kinase OS=Homo sapiens (Human) OX=9606 GN=RPS6KA2 PE=1 SV=1;>sp|Q15349-2|KS6A2-2_HUMAN Isoform of Q15349, Isoform 2 of Ribosomal protein S6 kinase alpha-2 OS=Homo sapiens (Human) OX=9606 GN=RPS6KA2 PE=1 SV=2;>sp|Q15349-3|KS6A2-3_HUMAN Isoform of Q15349, Isoform 3 of Ribosomal protein S6 kinase alpha-2 OS=Homo sapiens (Human) OX=9606 …	RPS6KA2	1.20672	0.0773262	No	0.102475	No	1.51559
Q96H20;Q96H20-2	>sp|Q96H20|SNF8_HUMAN Vacuolar-sorting protein SNF8 OS=Homo sapiens (Human) OX=9606 GN=SNF8 PE=1 SV=1;>sp|Q96H20-2|SNF8-2_HUMAN Isoform of Q96H20, Isoform 2 of Vacuolar-sorting protein SNF8 OS=Homo sapiens (Human) OX=9606 GN=SNF8 PE=1 SV=1	SNF8	0.785489	0.0775904	No	0.102711	No	-1.51411
P48147	>sp|P48147|PPCE_HUMAN Prolyl endopeptidase OS=Homo sapiens (Human) OX=9606 GN=PREP PE=1 SV=2	PREP	1.6976	0.0779879	No	0.103122	No	1.51181
P68363	>sp|P68363|TBA1B_HUMAN Tubulin alpha-1B chain OS=Homo sapiens (Human) OX=9606 GN=TUBA1B PE=1 SV=1	TUBA1B	0.893586	0.0783571	No	0.103495	No	-1.50974
A0A087WXC5;E7ESZ7;O95299	>tr|A0A087WXC5|A0A087WXC5_HUMAN Isoform of O95299, NADH dehydrogenase [ubiquinone] 1 alpha subcomplex subunit 10, mitochondrial OS=Homo sapiens (Human) OX=9606 GN=NDUFA10 PE=1 SV=1;>tr|E7ESZ7|E7ESZ7_HUMAN Isoform of O95299, NADH dehydrogenase [ubiquinone] 1 alpha subcomplex subunit 10, mitochondrial OS=Homo sapiens (Human) OX=9606 GN=NDUFA10 PE=1 SV=1;>sp|O95299|NDUAA_HUMAN NADH dehydrogenase [ub…	NDUFA10	0.857284	0.0786675	No	0.103789	No	-1.5081
P50416;P50416-2	>sp|P50416|CPT1A_HUMAN Carnitine O-palmitoyltransferase 1, liver isoform OS=Homo sapiens (Human) OX=9606 GN=CPT1A PE=1 SV=2;>sp|P50416-2|CPT1A-2_HUMAN Isoform of P50416, Isoform 2 of Carnitine O-palmitoyltransferase 1, liver isoform OS=Homo sapiens (Human) OX=9606 GN=CPT1A PE=1 SV=2	CPT1A	1.44604	0.0788713	No	0.103828	No	1.50702
F6SDV2;Q9GZM7;Q9GZM7-3	>tr|F6SDV2|F6SDV2_HUMAN Isoform of Q9GZM7, Pept_C1 domain-containing protein OS=Homo sapiens (Human) OX=9606 GN=TINAGL1 PE=1 SV=1;>sp|Q9GZM7|TINAL_HUMAN Tubulointerstitial nephritis antigen-like OS=Homo sapiens (Human) OX=9606 GN=TINAGL1 PE=1 SV=1;>sp|Q9GZM7-3|TINAL-3_HUMAN Isoform of Q9GZM7, Isoform 3 of Tubulointerstitial nephritis antigen-like OS=Homo sapiens (Human) OX=9606 GN=TINAGL1 PE=1 SV…	TINAGL1	1.61341	0.0788704	No	0.103828	No	1.50703
O00483	>sp|O00483|NDUA4_HUMAN Cytochrome c oxidase subunit NDUFA4 OS=Homo sapiens (Human) OX=9606 GN=NDUFA4 PE=1 SV=1	NDUFA4	0.679794	0.0789975	No	0.103879	No	-1.50638
O95881	>sp|O95881|TXD12_HUMAN Thioredoxin domain-containing protein 12 OS=Homo sapiens (Human) OX=9606 GN=TXNDC12 PE=1 SV=1	TXNDC12	1.23915	0.0795433	No	0.104481	No	1.50348
Q96D05;Q96D05-2	>sp|Q96D05|F241B_HUMAN Protein FAM241B OS=Homo sapiens (Human) OX=9606 GN=FAM241B PE=1 SV=1;>sp|Q96D05-2|F241B-2_HUMAN Isoform of Q96D05, Isoform 2 of Protein FAM241B OS=Homo sapiens (Human) OX=9606 GN=FAM241B PE=1 SV=1	FAM241B	0.699025	0.0797446	No	0.104629	No	-1.50241
P50395	>sp|P50395|GDIB_HUMAN Rab GDP dissociation inhibitor beta OS=Homo sapiens (Human) OX=9606 GN=GDI2 PE=1 SV=2	GDI2	1.15328	0.0798642	No	0.104638	No	1.50175
P22626	>sp|P22626|ROA2_HUMAN Heterogeneous nuclear ribonucleoproteins A2/B1 OS=Homo sapiens (Human) OX=9606 GN=HNRNPA2B1 PE=1 SV=2	HNRNPA2B1	1.15695	0.0799279	No	0.104638	No	1.50144
P46939;P46939-2	>sp|P46939|UTRO_HUMAN Utrophin OS=Homo sapiens (Human) OX=9606 GN=UTRN PE=1 SV=2;>sp|P46939-2|UTRO-2_HUMAN Isoform of P46939, Isoform 2 of Utrophin OS=Homo sapiens (Human) OX=9606 GN=UTRN PE=1 SV=2	UTRN	1.94813	0.0800746	No	0.104715	No	1.50061
A0A0A0MTM9;Q08462;Q08462-2	>tr|A0A0A0MTM9|A0A0A0MTM9_HUMAN Adenylate cyclase type 2 OS=Homo sapiens GN=ADCY2 PE=4 SV=1;>sp|Q08462|ADCY2_HUMAN Adenylate cyclase type 2 OS=Homo sapiens (Human) OX=9606 GN=ADCY2 PE=1 SV=5;>sp|Q08462-2|ADCY2-2_HUMAN Isoform of Q08462, Isoform 2 of Adenylate cyclase type 2 OS=Homo sapiens (Human) OX=9606 GN=ADCY2 PE=1 SV=5	ADCY2	1.65607	0.0805592	No	0.105102	No	1.49798
Q9UHA4	>sp|Q9UHA4|LTOR3_HUMAN Ragulator complex protein LAMTOR3 OS=Homo sapiens (Human) OX=9606 GN=LAMTOR3 PE=1 SV=1	LAMTOR3	1.42982	0.0806833	No	0.105102	No	1.49728
Q9C0E8;Q9C0E8-2;Q9C0E8-4	>sp|Q9C0E8|LNP_HUMAN Endoplasmic reticulum junction formation protein lunapark OS=Homo sapiens (Human) OX=9606 GN=LNPK PE=1 SV=2;>sp|Q9C0E8-2|LNP-2_HUMAN Isoform of Q9C0E8, Isoform 2 of Endoplasmic reticulum junction formation protein lunapark OS=Homo sapiens (Human) OX=9606 GN=LNPK PE=1 SV=2;>sp|Q9C0E8-4|LNP-4_HUMAN Isoform of Q9C0E8, Isoform 4 of Endoplasmic reticulum junction formation protein…	LNPK	0.618931	0.0806267	No	0.105102	No	-1.4976
O43615	>sp|O43615|TIM44_HUMAN Mitochondrial import inner membrane translocase subunit TIM44 OS=Homo sapiens (Human) OX=9606 GN=TIMM44 PE=1 SV=2	TIMM44	0.791796	0.0807242	No	0.105102	No	-1.49707
Q6VY07;Q6VY07-2	>sp|Q6VY07|PACS1_HUMAN Phosphofurin acidic cluster sorting protein 1 OS=Homo sapiens (Human) OX=9606 GN=PACS1 PE=1 SV=2;>sp|Q6VY07-2|PACS1-2_HUMAN Isoform of Q6VY07, Isoform 2 of Phosphofurin acidic cluster sorting protein 1 OS=Homo sapiens (Human) OX=9606 GN=PACS1 PE=1 SV=2	PACS1	0.797107	0.0808388	No	0.105135	No	-1.49646
I3L1U9;I3L3I0	>tr|I3L1U9|I3L1U9_HUMAN Isoform of P63261, Actin, cytoplasmic 2 (Fragment) OS=Homo sapiens (Human) OX=9606 GN=ACTG1 PE=1 SV=1;>tr|I3L3I0|I3L3I0_HUMAN Isoform of P63261, Actin, cytoplasmic 2 (Fragment) OS=Homo sapiens (Human) OX=9606 GN=ACTG1 PE=1 SV=1	ACTG1	2.16792	0.0809392	No	0.105145	No	1.496
Q9P260-2	>sp|Q9P260-2|RELCH-2_HUMAN Isoform of Q9P260, Isoform 2 of RAB11-binding protein RELCH OS=Homo sapiens (Human) OX=9606 GN=RELCH PE=1 SV=2	RELCH	0.828979	0.0810229	No	0.105145	No	-1.49558
Q9BUE6;Q9BUE6-2	>sp|Q9BUE6|ISCA1_HUMAN Iron-sulfur cluster assembly 1 homolog, mitochondrial OS=Homo sapiens (Human) OX=9606 GN=ISCA1 PE=1 SV=1;>sp|Q9BUE6-2|ISCA1-2_HUMAN Isoform of Q9BUE6, Isoform 2 of Iron-sulfur cluster assembly 1 homolog, mitochondrial OS=Homo sapiens (Human) OX=9606 GN=ISCA1 PE=1 SV=1	ISCA1	0.784698	0.0813821	No	0.105495	No	-1.49379
P78352;P78352-2;P78352-3	>sp|P78352|DLG4_HUMAN Disks large homolog 4 OS=Homo sapiens (Human) OX=9606 GN=DLG4 PE=1 SV=3;>sp|P78352-2|DLG4-2_HUMAN Isoform of P78352, Isoform 2 of Disks large homolog 4 OS=Homo sapiens (Human) OX=9606 GN=DLG4 PE=1 SV=3;>sp|P78352-3|DLG4-3_HUMAN Isoform of P78352, Isoform 3 of Disks large homolog 4 OS=Homo sapiens (Human) OX=9606 GN=DLG4 PE=1 SV=3	DLG4	0.781322	0.081885	No	0.106032	No	-1.49112
C9JFZ1;O43426-2;O43426-4	>tr|C9JFZ1|C9JFZ1_HUMAN Isoform of O43426, Synaptojanin-1 OS=Homo sapiens (Human) OX=9606 GN=SYNJ1 PE=1 SV=1;>sp|O43426-2|SYNJ1-2_HUMAN Isoform of O43426, Isoform 2 of Synaptojanin-1 OS=Homo sapiens (Human) OX=9606 GN=SYNJ1 PE=1 SV=2;>sp|O43426-4|SYNJ1-4_HUMAN Isoform of O43426, Isoform 3 of Synaptojanin-1 OS=Homo sapiens (Human) OX=9606 GN=SYNJ1 PE=1 SV=2	SYNJ1	0.843099	0.0820108	No	0.106079	No	-1.4905
Q13347	>sp|Q13347|EIF3I_HUMAN Eukaryotic translation initiation factor 3 subunit I OS=Homo sapiens (Human) OX=9606 GN=EIF3I PE=1 SV=1	EIF3I	1.60015	0.0822579	No	0.106167	No	1.48922
Q9UDW1	>sp|Q9UDW1|QCR9_HUMAN Cytochrome b-c1 complex subunit 9 OS=Homo sapiens (Human) OX=9606 GN=UQCR10 PE=1 SV=3	UQCR10	0.542772	0.0822258	No	0.106167	No	-1.48939
P09429;Q5T7C4;Q5T7C6	>sp|P09429|HMGB1_HUMAN High mobility group protein B1 OS=Homo sapiens (Human) OX=9606 GN=HMGB1 PE=1 SV=3;>tr|Q5T7C4|Q5T7C4_HUMAN Isoform of P09429, High mobility group protein B1 OS=Homo sapiens (Human) OX=9606 GN=HMGB1 PE=1 SV=1;>tr|Q5T7C6|Q5T7C6_HUMAN High mobility group protein B1 (Fragment) OS=Homo sapiens GN=HMGB1 PE=1 SV=1	HMGB1	1.45623	0.0824621	No	0.106252	No	1.48814
P35579	>sp|P35579|MYH9_HUMAN Myosin-9 OS=Homo sapiens (Human) OX=9606 GN=MYH9 PE=1 SV=4	MYH9	1.30773	0.0826812	No	0.106252	No	1.48705
P08670	>sp|P08670|VIME_HUMAN Vimentin OS=Homo sapiens (Human) OX=9606 GN=VIM PE=1 SV=4	VIM	1.42184	0.0826583	No	0.106252	No	1.48716
O00401	>sp|O00401|WASL_HUMAN Neural Wiskott-Aldrich syndrome protein OS=Homo sapiens (Human) OX=9606 GN=WASL PE=1 SV=2	WASL	1.97837	0.0826708	No	0.106252	No	1.48709
P31146	>sp|P31146|COR1A_HUMAN Coronin-1A OS=Homo sapiens (Human) OX=9606 GN=CORO1A PE=1 SV=4	CORO1A	0.857335	0.0831092	No	0.106686	No	-1.48493
P36915	>sp|P36915|GNL1_HUMAN Guanine nucleotide-binding protein-like 1 OS=Homo sapiens (Human) OX=9606 GN=GNL1 PE=1 SV=2	GNL1	0.872372	0.0838075	No	0.107466	No	-1.48143
P49721	>sp|P49721|PSB2_HUMAN Proteasome subunit beta type-2 OS=Homo sapiens (Human) OX=9606 GN=PSMB2 PE=1 SV=1	PSMB2	1.2167	0.0840721	No	0.107689	No	1.48009
O43237;O43237-2	>sp|O43237|DC1L2_HUMAN Cytoplasmic dynein 1 light intermediate chain 2 OS=Homo sapiens (Human) OX=9606 GN=DYNC1LI2 PE=1 SV=1;>sp|O43237-2|DC1L2-2_HUMAN Isoform of O43237, Isoform 2 of Cytoplasmic dynein 1 light intermediate chain 2 OS=Homo sapiens (Human) OX=9606 GN=DYNC1LI2 PE=1 SV=1	DYNC1LI2	0.857155	0.0845529	No	0.108188	No	-1.47766
P53004	>sp|P53004|BIEA_HUMAN Biliverdin reductase A OS=Homo sapiens (Human) OX=9606 GN=BLVRA PE=1 SV=2	BLVRA	1.25377	0.0849579	No	0.108473	No	1.47558
A0A087WT27;J3KN95;O95394;O95394-3;O95394-4	>tr|A0A087WT27|A0A087WT27_HUMAN Isoform of O95394, Phosphoacetylglucosamine mutase OS=Homo sapiens (Human) OX=9606 GN=PGM3 PE=1 SV=2;>tr|J3KN95|J3KN95_HUMAN Isoform of O95394, Phosphoacetylglucosamine mutase OS=Homo sapiens (Human) OX=9606 GN=PGM3 PE=1 SV=2;>sp|O95394|AGM1_HUMAN Phosphoacetylglucosamine mutase OS=Homo sapiens (Human) OX=9606 GN=PGM3 PE=1 SV=1;>sp|O95394-3|AGM1-3_HUMAN Isoform of …	PGM3	1.49571	0.0849258	No	0.108473	No	1.47576
P63010;P63010-2	>sp|P63010|AP2B1_HUMAN AP-2 complex subunit beta OS=Homo sapiens (Human) OX=9606 GN=AP2B1 PE=1 SV=1;>sp|P63010-2|AP2B1-2_HUMAN Isoform of P63010, Isoform 2 of AP-2 complex subunit beta OS=Homo sapiens (Human) OX=9606 GN=AP2B1 PE=1 SV=1	AP2B1	0.889459	0.0853292	No	0.10855	No	-1.47377
O75947	>sp|O75947|ATP5H_HUMAN ATP synthase subunit d, mitochondrial OS=Homo sapiens (Human) OX=9606 GN=ATP5PD PE=1 SV=3	ATP5PD	0.798225	0.0852138	No	0.10855	No	-1.47434
F6X2W2;Q7Z3B1	>tr|F6X2W2|F6X2W2_HUMAN Neuronal growth regulator 1 OS=Homo sapiens GN=NEGR1 PE=4 SV=1;>sp|Q7Z3B1|NEGR1_HUMAN Neuronal growth regulator 1 OS=Homo sapiens (Human) OX=9606 GN=NEGR1 PE=1 SV=3	NEGR1	0.81984	0.0853837	No	0.10855	No	-1.47346
O75533	>sp|O75533|SF3B1_HUMAN Splicing factor 3B subunit 1 OS=Homo sapiens (Human) OX=9606 GN=SF3B1 PE=1 SV=3	SF3B1	1.35193	0.0852375	No	0.10855	No	1.4742
Q9UJQ1;Q9UJQ1-2	>sp|Q9UJQ1|LAMP5_HUMAN Lysosome-associated membrane glycoprotein 5 OS=Homo sapiens (Human) OX=9606 GN=LAMP5 PE=1 SV=1;>sp|Q9UJQ1-2|LAMP5-2_HUMAN Isoform of Q9UJQ1, Isoform 2 of Lysosome-associated membrane glycoprotein 5 OS=Homo sapiens (Human) OX=9606 GN=LAMP5 PE=1 SV=1	LAMP5	0.54012	0.0857058	No	0.108843	No	-1.47188
P22234;P22234-2	>sp|P22234|PUR6_HUMAN Multifunctional protein ADE2 OS=Homo sapiens (Human) OX=9606 GN=PAICS PE=1 SV=3;>sp|P22234-2|PUR6-2_HUMAN Isoform of P22234, Isoform 2 of Multifunctional protein ADE2 OS=Homo sapiens (Human) OX=9606 GN=PAICS PE=1 SV=3	PAICS	1.20685	0.0858517	No	0.108911	No	1.47115
P05023;P05023-4	>sp|P05023|AT1A1_HUMAN Sodium/potassium-transporting ATPase subunit alpha-1 OS=Homo sapiens (Human) OX=9606 GN=ATP1A1 PE=1 SV=1;>sp|P05023-4|AT1A1-4_HUMAN Isoform of P05023, Isoform 4 of Sodium/potassium-transporting ATPase subunit alpha-1 OS=Homo sapiens (Human) OX=9606 GN=ATP1A1 PE=1 SV=1	ATP1A1	0.874707	0.0861467	No	0.109169	No	-1.46972
O95747	>sp|O95747|OXSR1_HUMAN Serine/threonine-protein kinase OSR1 OS=Homo sapiens (Human) OX=9606 GN=OXSR1 PE=1 SV=1	OXSR1	0.712829	0.0865254	No	0.109415	No	-1.46791
Q00577	>sp|Q00577|PURA_HUMAN Transcriptional activator protein Pur-alpha OS=Homo sapiens (Human) OX=9606 GN=PURA PE=1 SV=2	PURA	0.840031	0.0864812	No	0.109415	No	-1.4681
Q9H115	>sp|Q9H115|SNAB_HUMAN Beta-soluble NSF attachment protein OS=Homo sapiens (Human) OX=9606 GN=NAPB PE=1 SV=2	NAPB	0.861951	0.08673	No	0.109557	No	-1.46692
O75475	>sp|O75475|PSIP1_HUMAN PC4 and SFRS1-interacting protein OS=Homo sapiens (Human) OX=9606 GN=PSIP1 PE=1 SV=1	PSIP1	0.845764	0.08698	No	0.109756	No	-1.46568
O00408;O00408-2;O00408-3;O00408-4	>sp|O00408|PDE2A_HUMAN cGMP-dependent 3',5'-cyclic phosphodiesterase OS=Homo sapiens (Human) OX=9606 GN=PDE2A PE=1 SV=1;>sp|O00408-2|PDE2A-2_HUMAN Isoform of O00408, Isoform PDE2A1 of cGMP-dependent 3',5'-cyclic phosphodiesterase OS=Homo sapiens (Human) OX=9606 GN=PDE2A PE=1 SV=1;>sp|O00408-3|PDE2A-3_HUMAN Isoform of O00408, Isoform PDE2A2 of cGMP-dependent 3',5'-cyclic phosphodiesterase OS=Homo …	PDE2A	1.20504	0.0875925	No	0.110412	No	1.4627
P30531	>sp|P30531|SC6A1_HUMAN Sodium- and chloride-dependent GABA transporter 1 OS=Homo sapiens (Human) OX=9606 GN=SLC6A1 PE=1 SV=2	SLC6A1	1.31401	0.0879308	No	0.110721	No	1.46101
Q9P2J5	>sp|Q9P2J5|SYLC_HUMAN Leucine--tRNA ligase, cytoplasmic OS=Homo sapiens (Human) OX=9606 GN=LARS PE=1 SV=2	LARS	0.855641	0.0882871	No	0.111052	No	-1.45933
P20336	>sp|P20336|RAB3A_HUMAN Ras-related protein Rab-3A OS=Homo sapiens (Human) OX=9606 GN=RAB3A PE=1 SV=1	RAB3A	1.23886	0.0889738	No	0.111708	No	1.45594
O60784;O60784-2	>sp|O60784|TOM1_HUMAN Target of Myb protein 1 OS=Homo sapiens (Human) OX=9606 GN=TOM1 PE=1 SV=2;>sp|O60784-2|TOM1-2_HUMAN Isoform of O60784, Isoform 2 of Target of Myb protein 1 OS=Homo sapiens (Human) OX=9606 GN=TOM1 PE=1 SV=2	TOM1	0.802476	0.0889971	No	0.111708	No	-1.45583
Q8TDC3;Q8TDC3-2	>sp|Q8TDC3|BRSK1_HUMAN Serine/threonine-protein kinase BRSK1 OS=Homo sapiens (Human) OX=9606 GN=BRSK1 PE=1 SV=2;>sp|Q8TDC3-2|BRSK1-2_HUMAN Isoform of Q8TDC3, Isoform 2 of Serine/threonine-protein kinase BRSK1 OS=Homo sapiens (Human) OX=9606 GN=BRSK1 PE=1 SV=2	BRSK1	0.619196	0.0891363	No	0.111765	No	-1.45514
Q02790	>sp|Q02790|FKBP4_HUMAN Peptidyl-prolyl cis-trans isomerase FKBP4 OS=Homo sapiens (Human) OX=9606 GN=FKBP4 PE=1 SV=3	FKBP4	0.82597	0.0896108	No	0.112241	No	-1.45284
H0YJ34;Q96AC1;Q96AC1-2;Q96AC1-3	>tr|H0YJ34|H0YJ34_HUMAN Isoform of Q96AC1, PH domain-containing protein (Fragment) OS=Homo sapiens (Human) OX=9606 GN=FERMT2 PE=1 SV=1;>sp|Q96AC1|FERM2_HUMAN Fermitin family homolog 2 OS=Homo sapiens (Human) OX=9606 GN=FERMT2 PE=1 SV=1;>sp|Q96AC1-2|FERM2-2_HUMAN Isoform of Q96AC1, Isoform 2 of Fermitin family homolog 2 OS=Homo sapiens (Human) OX=9606 GN=FERMT2 PE=1 SV=1;>sp|Q96AC1-3|FERM2-3_HUMAN…	FERMT2	1.60419	0.0897167	No	0.112255	No	1.45229
P46379;P46379-2;P46379-3	>sp|P46379|BAG6_HUMAN Large proline-rich protein BAG6 OS=Homo sapiens (Human) OX=9606 GN=BAG6 PE=1 SV=2;>sp|P46379-2|BAG6-2_HUMAN Isoform of P46379, Isoform 2 of Large proline-rich protein BAG6 OS=Homo sapiens (Human) OX=9606 GN=BAG6 PE=1 SV=2;>sp|P46379-3|BAG6-3_HUMAN Isoform of P46379, Isoform 3 of Large proline-rich protein BAG6 OS=Homo sapiens (Human) OX=9606 GN=BAG6 PE=1 SV=2	BAG6	0.841617	0.0898488	No	0.112302	No	-1.45169
B1AK87;B1AK88;P47756-2	>tr|B1AK87|B1AK87_HUMAN Isoform of P47756, F-actin-capping protein subunit beta OS=Homo sapiens (Human) OX=9606 GN=CAPZB PE=1 SV=1;>tr|B1AK88|B1AK88_HUMAN Isoform of P47756, F-actin-capping protein subunit beta OS=Homo sapiens (Human) OX=9606 GN=CAPZB PE=1 SV=1;>sp|P47756-2|CAPZB-2_HUMAN Isoform of P47756, Isoform 2 of F-actin-capping protein subunit beta OS=Homo sapiens (Human) OX=9606 GN=CAPZB …	CAPZB	1.16844	0.0906579	No	0.112513	No	1.44796
P04040	>sp|P04040|CATA_HUMAN Catalase OS=Homo sapiens (Human) OX=9606 GN=CAT PE=1 SV=3	CAT	1.51445	0.0910596	No	0.112513	No	1.44609
P46109	>sp|P46109|CRKL_HUMAN Crk-like protein OS=Homo sapiens (Human) OX=9606 GN=CRKL PE=1 SV=1	CRKL	1.32347	0.0902958	No	0.112513	No	1.4496
Q96EY1;Q96EY1-2	>sp|Q96EY1|DNJA3_HUMAN DnaJ homolog subfamily A member 3, mitochondrial OS=Homo sapiens (Human) OX=9606 GN=DNAJA3 PE=1 SV=2;>sp|Q96EY1-2|DNJA3-2_HUMAN Isoform of Q96EY1, Isoform 2 of DnaJ homolog subfamily A member 3, mitochondrial OS=Homo sapiens (Human) OX=9606 GN=DNAJA3 PE=1 SV=2	DNAJA3	0.829124	0.0909946	No	0.112513	No	-1.44642
Q8TAM6;Q8TAM6-2	>sp|Q8TAM6|ERMIN_HUMAN Ermin OS=Homo sapiens (Human) OX=9606 GN=ERMN PE=2 SV=1;>sp|Q8TAM6-2|ERMIN-2_HUMAN Isoform of Q8TAM6, Isoform 2 of Ermin OS=Homo sapiens (Human) OX=9606 GN=ERMN PE=2 SV=1	ERMN	0.606494	0.0911171	No	0.112513	No	-1.44579
Q16891;Q16891-2	>sp|Q16891|MIC60_HUMAN MICOS complex subunit MIC60 OS=Homo sapiens (Human) OX=9606 GN=IMMT PE=1 SV=1;>sp|Q16891-2|MIC60-2_HUMAN Isoform of Q16891, Isoform 2 of MICOS complex subunit MIC60 OS=Homo sapiens (Human) OX=9606 GN=IMMT PE=1 SV=1	IMMT	0.861127	0.0911062	No	0.112513	No	-1.44583
Q8WXG6;Q8WXG6-7	>sp|Q8WXG6|MADD_HUMAN MAP kinase-activating death domain protein OS=Homo sapiens (Human) OX=9606 GN=MADD PE=1 SV=2;>sp|Q8WXG6-7|MADD-7_HUMAN Isoform of Q8WXG6, Isoform 7 of MAP kinase-activating death domain protein OS=Homo sapiens (Human) OX=9606 GN=MADD PE=1 SV=2	MADD	0.815394	0.0912333	No	0.112513	No	-1.44523
P43121	>sp|P43121|MUC18_HUMAN Cell surface glycoprotein MUC18 OS=Homo sapiens (Human) OX=9606 GN=MCAM PE=1 SV=2	MCAM	1.2474	0.0903208	No	0.112513	No	1.44947
P03905	>sp|P03905|NU4M_HUMAN NADH-ubiquinone oxidoreductase chain 4 OS=Homo sapiens (Human) OX=9606 GN=MT-ND4 PE=1 SV=1	MT-ND4	0.740804	0.0909946	No	0.112513	No	-1.44642
P62745	>sp|P62745|RHOB_HUMAN Rho-related GTP-binding protein RhoB OS=Homo sapiens (Human) OX=9606 GN=RHOB PE=1 SV=1	RHOB	2.52616	0.0906113	No	0.112513	No	1.44817
P04179	>sp|P04179|SODM_HUMAN Superoxide dismutase [Mn], mitochondrial OS=Homo sapiens (Human) OX=9606 GN=SOD2 PE=1 SV=3	SOD2	1.24997	0.0903092	No	0.112513	No	1.44955
O75962;O75962-2;O75962-5	>sp|O75962|TRIO_HUMAN Triple functional domain protein OS=Homo sapiens (Human) OX=9606 GN=TRIO PE=1 SV=2;>sp|O75962-2|TRIO-2_HUMAN Isoform of O75962, Isoform 2 of Triple functional domain protein OS=Homo sapiens (Human) OX=9606 GN=TRIO PE=1 SV=2;>sp|O75962-5|TRIO-5_HUMAN Isoform of O75962, Isoform 5 of Triple functional domain protein OS=Homo sapiens (Human) OX=9606 GN=TRIO PE=1 SV=2	TRIO	1.28461	0.0912492	No	0.112513	No	1.44517
P22314;P22314-2	>sp|P22314|UBA1_HUMAN Ubiquitin-like modifier-activating enzyme 1 OS=Homo sapiens (Human) OX=9606 GN=UBA1 PE=1 SV=3;>sp|P22314-2|UBA1-2_HUMAN Isoform of P22314, Isoform 2 of Ubiquitin-like modifier-activating enzyme 1 OS=Homo sapiens (Human) OX=9606 GN=UBA1 PE=1 SV=3	UBA1	1.13707	0.0906883	No	0.112513	No	1.44783
P62191	>sp|P62191|PRS4_HUMAN 26S proteasome regulatory subunit 4 OS=Homo sapiens (Human) OX=9606 GN=PSMC1 PE=1 SV=1	PSMC1	0.823155	0.09162	No	0.112853	No	-1.44338
E7EPM6;P33121;P33121-2;P33121-3	>tr|E7EPM6|E7EPM6_HUMAN Isoform of P33121, Long-chain-fatty-acid--CoA ligase 1 OS=Homo sapiens (Human) OX=9606 GN=ACSL1 PE=1 SV=1;>sp|P33121|ACSL1_HUMAN Long-chain-fatty-acid--CoA ligase 1 OS=Homo sapiens (Human) OX=9606 GN=ACSL1 PE=1 SV=1;>sp|P33121-2|ACSL1-2_HUMAN Isoform of P33121, Isoform 2 of Long-chain-fatty-acid--CoA ligase 1 OS=Homo sapiens (Human) OX=9606 GN=ACSL1 PE=1 SV=1;>sp|P33121-3|…	ACSL1	1.28212	0.0917725	No	0.112924	No	1.44264
O15371;O15371-2;O15371-3	>sp|O15371|EIF3D_HUMAN Eukaryotic translation initiation factor 3 subunit D OS=Homo sapiens (Human) OX=9606 GN=EIF3D PE=1 SV=1;>sp|O15371-2|EIF3D-2_HUMAN Isoform of O15371, Isoform 2 of Eukaryotic translation initiation factor 3 subunit D OS=Homo sapiens (Human) OX=9606 GN=EIF3D PE=1 SV=1;>sp|O15371-3|EIF3D-3_HUMAN Isoform of O15371, Isoform 3 of Eukaryotic translation initiation factor 3 subunit…	EIF3D	1.20992	0.0919163	No	0.112984	No	1.44201
P48426	>sp|P48426|PI42A_HUMAN Phosphatidylinositol 5-phosphate 4-kinase type-2 alpha OS=Homo sapiens (Human) OX=9606 GN=PIP4K2A PE=1 SV=2	PIP4K2A	0.859583	0.0920221	No	0.112997	No	-1.44153
P24666	>sp|P24666|PPAC_HUMAN Low molecular weight phosphotyrosine protein phosphatase OS=Homo sapiens (Human) OX=9606 GN=ACP1 PE=1 SV=3	ACP1	1.35712	0.0924304	No	0.113381	No	1.43961
Q9NVG8;Q9NVG8-2	>sp|Q9NVG8|TBC13_HUMAN TBC1 domain family member 13 OS=Homo sapiens (Human) OX=9606 GN=TBC1D13 PE=1 SV=3;>sp|Q9NVG8-2|TBC13-2_HUMAN Isoform of Q9NVG8, Isoform 2 of TBC1 domain family member 13 OS=Homo sapiens (Human) OX=9606 GN=TBC1D13 PE=1 SV=3	TBC1D13	0.74567	0.0926708	No	0.113558	No	-1.43845
P12081;P12081-2;P12081-3;P12081-4	>sp|P12081|SYHC_HUMAN Histidine--tRNA ligase, cytoplasmic OS=Homo sapiens (Human) OX=9606 GN=HARS PE=1 SV=2;>sp|P12081-2|SYHC-2_HUMAN Isoform of P12081, Isoform 2 of Histidine--tRNA ligase, cytoplasmic OS=Homo sapiens (Human) OX=9606 GN=HARS PE=1 SV=2;>sp|P12081-3|SYHC-3_HUMAN Isoform of P12081, Isoform 3 of Histidine--tRNA ligase, cytoplasmic OS=Homo sapiens (Human) OX=9606 GN=HARS PE=1 SV=2;>sp…	HARS	0.891524	0.0935496	No	0.114164	No	-1.43423
Q00169	>sp|Q00169|PIPNA_HUMAN Phosphatidylinositol transfer protein alpha isoform OS=Homo sapiens (Human) OX=9606 GN=PITPNA PE=1 SV=2	PITPNA	1.49452	0.0934304	No	0.114164	No	1.43479
O43772	>sp|O43772|MCAT_HUMAN Mitochondrial carnitine/acylcarnitine carrier protein OS=Homo sapiens (Human) OX=9606 GN=SLC25A20 PE=1 SV=1	SLC25A20	1.2637	0.0935429	No	0.114164	No	1.43426
A0A0A0MS98;P02730	>tr|A0A0A0MS98|A0A0A0MS98_HUMAN Isoform of P02730, Band 3 anion transport protein OS=Homo sapiens (Human) OX=9606 GN=SLC4A1 PE=1 SV=1;>sp|P02730|B3AT_HUMAN Band 3 anion transport protein OS=Homo sapiens (Human) OX=9606 GN=SLC4A1 PE=1 SV=3	SLC4A1	1.3332	0.0933917	No	0.114164	No	1.43498
Q9UPA5	>sp|Q9UPA5|BSN_HUMAN Protein bassoon OS=Homo sapiens (Human) OX=9606 GN=BSN PE=1 SV=4	BSN	0.819791	0.0940446	No	0.114446	No	-1.43196
P30040	>sp|P30040|ERP29_HUMAN Endoplasmic reticulum resident protein 29 OS=Homo sapiens (Human) OX=9606 GN=ERP29 PE=1 SV=4	ERP29	0.815378	0.0941663	No	0.114446	No	-1.43143
P17066	>sp|P17066|HSP76_HUMAN Heat shock 70 kDa protein 6 OS=Homo sapiens (Human) OX=9606 GN=HSPA6 PE=1 SV=2	HSPA6	1.47613	0.0941554	No	0.114446	No	1.43147
Q5JU85;Q5JU85-2;Q5JU85-3	>sp|Q5JU85|IQEC2_HUMAN IQ motif and SEC7 domain-containing protein 2 OS=Homo sapiens (Human) OX=9606 GN=IQSEC2 PE=1 SV=2;>sp|Q5JU85-2|IQEC2_HUMAN Isoform 2 of IQ motif and SEC7 domain-containing protein 2 OS=Homo sapiens GN=IQSEC2;>sp|Q5JU85-3|IQEC2-3_HUMAN Isoform of Q5JU85, Isoform 2 of IQ motif and SEC7 domain-containing protein 2 OS=Homo sapiens (Human) OX=9606 GN=IQSEC2 PE=1 SV=2	IQSEC2	0.840353	0.0939242	No	0.114446	No	-1.4325
Q9UHV9	>sp|Q9UHV9|PFD2_HUMAN Prefoldin subunit 2 OS=Homo sapiens (Human) OX=9606 GN=PFDN2 PE=1 SV=1	PFDN2	0.795525	0.0943083	No	0.114502	No	-1.43084
Q8IWT6	>sp|Q8IWT6|LRC8A_HUMAN Volume-regulated anion channel subunit LRRC8A OS=Homo sapiens (Human) OX=9606 GN=LRRC8A PE=1 SV=1	LRRC8A	1.17233	0.09481	No	0.114876	No	1.42854
Q8WXF1;Q8WXF1-2;X6RDA4	>sp|Q8WXF1|PSPC1_HUMAN Paraspeckle component 1 OS=Homo sapiens (Human) OX=9606 GN=PSPC1 PE=1 SV=1;>sp|Q8WXF1-2|PSPC1-2_HUMAN Isoform of Q8WXF1, Isoform 2 of Paraspeckle component 1 OS=Homo sapiens (Human) OX=9606 GN=PSPC1 PE=1 SV=1;>tr|X6RDA4|X6RDA4_HUMAN Isoform of Q8WXF1, Paraspeckle component 1 (Fragment) OS=Homo sapiens (Human) OX=9606 GN=PSPC1 PE=1 SV=1	PSPC1	0.67933	0.0947596	No	0.114876	No	-1.42872
P21579	>sp|P21579|SYT1_HUMAN Synaptotagmin-1 OS=Homo sapiens (Human) OX=9606 GN=SYT1 PE=1 SV=1	SYT1	0.858201	0.0961975	No	0.116438	No	-1.42215
Q14C86;Q14C86-2;Q14C86-4;Q14C86-5;Q14C86-6	>sp|Q14C86|GAPD1_HUMAN GTPase-activating protein and VPS9 domain-containing protein 1 OS=Homo sapiens (Human) OX=9606 GN=GAPVD1 PE=1 SV=2;>sp|Q14C86-2|GAPD1-2_HUMAN Isoform of Q14C86, Isoform 2 of GTPase-activating protein and VPS9 domain-containing protein 1 OS=Homo sapiens (Human) OX=9606 GN=GAPVD1 PE=1 SV=2;>sp|Q14C86-4|GAPD1-4_HUMAN Isoform of Q14C86, Isoform 4 of GTPase-activating protein an…	GAPVD1	0.726498	0.0967154	No	0.116946	No	-1.41977
Q9H0B6	>sp|Q9H0B6|KLC2_HUMAN Kinesin light chain 2 OS=Homo sapiens (Human) OX=9606 GN=KLC2 PE=1 SV=1	KLC2	0.808315	0.0972463	No	0.117229	No	-1.41745
A0A0A0MS47;A0A0A0MTN4;Q96PE5;Q96PE5-2;Q96PE5-3;Q96	NA	OPALIN	0.410618	0.0971604	No	0.117229	No	-1.4178
P11498	>sp|P11498|PYC_HUMAN Pyruvate carboxylase, mitochondrial OS=Homo sapiens (Human) OX=9606 GN=PC PE=1 SV=2	PC	1.17807	0.0971242	No	0.117229	No	1.41796
K7EIJ8;K7EM02;Q8IYT4;Q8IYT4-2	>tr|K7EIJ8|K7EIJ8_HUMAN Isoform of Q8IYT4, AAA domain-containing protein (Fragment) OS=Homo sapiens (Human) OX=9606 GN=KATNAL2 PE=1 SV=1;>tr|K7EM02|K7EM02_HUMAN Isoform of Q8IYT4, AAA domain-containing protein (Fragment) OS=Homo sapiens (Human) OX=9606 GN=KATNAL2 PE=1 SV=1;>sp|Q8IYT4|KATL2_HUMAN Katanin p60 ATPase-containing subunit A-like 2 OS=Homo sapiens (Human) OX=9606 GN=KATNAL2 PE=1 SV=3;>s…	KATNAL2	1.15197	0.09744	No	0.117344	No	1.41656
A0A087WZH7;P29966	>tr|A0A087WZH7|A0A087WZH7_HUMAN Myristoylated alanine-rich C-kinase substrate OS=Homo sapiens GN=MARCKS PE=1 SV=1;>sp|P29966|MARCS_HUMAN Myristoylated alanine-rich C-kinase substrate OS=Homo sapiens (Human) OX=9606 GN=MARCKS PE=1 SV=4	MARCKS	1.43952	0.0977079	No	0.117547	No	1.41535
Q15907	>sp|Q15907|RB11B_HUMAN Ras-related protein Rab-11B OS=Homo sapiens (Human) OX=9606 GN=RAB11B PE=1 SV=4	RAB11B	1.18882	0.0990871	No	0.119024	No	1.40928
Q15286;Q15286-2	>sp|Q15286|RAB35_HUMAN Ras-related protein Rab-35 OS=Homo sapiens (Human) OX=9606 GN=RAB35 PE=1 SV=1;>sp|Q15286-2|RAB35-2_HUMAN Isoform of Q15286, Isoform 2 of Ras-related protein Rab-35 OS=Homo sapiens (Human) OX=9606 GN=RAB35 PE=1 SV=1	RAB35	1.98228	0.0991354	No	0.119024	No	1.4091
P27144	>sp|P27144|KAD4_HUMAN Adenylate kinase 4, mitochondrial OS=Homo sapiens (Human) OX=9606 GN=AK4 PE=1 SV=1	AK4	1.19727	0.0993058	No	0.119077	No	1.40841
O43809	>sp|O43809|CPSF5_HUMAN Cleavage and polyadenylation specificity factor subunit 5 OS=Homo sapiens (Human) OX=9606 GN=NUDT21 PE=1 SV=1	NUDT21	0.628274	0.0993808	No	0.119077	No	-1.40806
B4DXW1;P61158	>tr|B4DXW1|B4DXW1_HUMAN Isoform of P61158, Actin-related protein 3 OS=Homo sapiens (Human) OX=9606 GN=ACTR3 PE=1 SV=1;>sp|P61158|ARP3_HUMAN Actin-related protein 3 OS=Homo sapiens (Human) OX=9606 GN=ACTR3 PE=1 SV=3	ACTR3	1.30049	0.0997317	No	0.119377	No	1.40653
F6TLX2;Q9HC38;Q9HC38-2	>tr|F6TLX2|F6TLX2_HUMAN Isoform of Q9HC38, Glyoxalase domain-containing protein 4 OS=Homo sapiens (Human) OX=9606 GN=GLOD4 PE=1 SV=1;>sp|Q9HC38|GLOD4_HUMAN Glyoxalase domain-containing protein 4 OS=Homo sapiens (Human) OX=9606 GN=GLOD4 PE=1 SV=1;>sp|Q9HC38-2|GLOD4-2_HUMAN Isoform of Q9HC38, Isoform 2 of Glyoxalase domain-containing protein 4 OS=Homo sapiens (Human) OX=9606 GN=GLOD4 PE=1 SV=1	GLOD4	1.26383	0.100694	No	0.120333	No	1.40231
P55809	>sp|P55809|SCOT1_HUMAN Succinyl-CoA:3-ketoacid coenzyme A transferase 1, mitochondrial OS=Homo sapiens (Human) OX=9606 GN=OXCT1 PE=1 SV=1	OXCT1	1.33354	0.100733	No	0.120333	No	1.40217
Q92871	>sp|Q92871|PMM1_HUMAN Phosphomannomutase 1 OS=Homo sapiens (Human) OX=9606 GN=PMM1 PE=1 SV=2	PMM1	0.688298	0.100902	No	0.120414	No	-1.40139
H0Y9B7;Q8NC56;Q8NC56-2	>tr|H0Y9B7|H0Y9B7_HUMAN Isoform of Q8NC56, LEM domain-containing protein 2 (Fragment) OS=Homo sapiens (Human) OX=9606 GN=LEMD2 PE=1 SV=1;>sp|Q8NC56|LEMD2_HUMAN LEM domain-containing protein 2 OS=Homo sapiens (Human) OX=9606 GN=LEMD2 PE=1 SV=1;>sp|Q8NC56-2|LEMD2-2_HUMAN Isoform of Q8NC56, Isoform 2 of LEM domain-containing protein 2 OS=Homo sapiens (Human) OX=9606 GN=LEMD2 PE=1 SV=1	LEMD2	0.806069	0.101198	No	0.120646	No	-1.40007
O14745	>sp|O14745|NHRF1_HUMAN Na(+)/H(+) exchange regulatory cofactor NHE-RF1 OS=Homo sapiens (Human) OX=9606 GN=SLC9A3R1 PE=1 SV=4	SLC9A3R1	1.43178	0.102302	No	0.12184	No	1.39547
P07355	>sp|P07355|ANXA2_HUMAN Annexin A2 OS=Homo sapiens (Human) OX=9606 GN=ANXA2 PE=1 SV=2	ANXA2	1.55518	0.102493	No	0.121944	No	1.39471
E9PFD7;P00533;Q504U8	>tr|E9PFD7|E9PFD7_HUMAN Isoform of P00533, Receptor protein-tyrosine kinase OS=Homo sapiens (Human) OX=9606 GN=EGFR PE=1 SV=3;>sp|P00533|EGFR_HUMAN Epidermal growth factor receptor OS=Homo sapiens (Human) OX=9606 GN=EGFR PE=1 SV=2;>tr|Q504U8|Q504U8_HUMAN Isoform of P00533, Receptor protein-tyrosine kinase OS=Homo sapiens (Human) OX=9606 GN=EGFR PE=1 SV=1	EGFR	1.34199	0.103062	No	0.122499	No	1.39224
Q96IX5	>sp|Q96IX5|ATPMD_HUMAN ATP synthase membrane subunit DAPIT, mitochondrial OS=Homo sapiens (Human) OX=9606 GN=ATP5MD PE=1 SV=1	ATP5MD	0.599023	0.103897	No	0.123053	No	-1.38862
G3V583;Q8N128;Q8N128-2	>tr|G3V583|G3V583_HUMAN Isoform of Q8N128, Protein FAM177A1 (Fragment) OS=Homo sapiens (Human) OX=9606 GN=FAM177A1 PE=1 SV=1;>sp|Q8N128|F177A_HUMAN Protein FAM177A1 OS=Homo sapiens (Human) OX=9606 GN=FAM177A1 PE=1 SV=1;>sp|Q8N128-2|F177A-2_HUMAN Isoform of Q8N128, Isoform 2 of Protein FAM177A1 OS=Homo sapiens (Human) OX=9606 GN=FAM177A1 PE=1 SV=1	FAM177A1	0.71641	0.103935	No	0.123053	No	-1.38844
Q8TB36	>sp|Q8TB36|GDAP1_HUMAN Ganglioside-induced differentiation-associated protein 1 OS=Homo sapiens (Human) OX=9606 GN=GDAP1 PE=1 SV=3	GDAP1	0.860408	0.103942	No	0.123053	No	-1.38841
Q5TAQ0;Q9BRT2;V5IRT4	>tr|Q5TAQ0|Q5TAQ0_HUMAN Isoform of Q9BRT2, Ubiquinol-cytochrome-c reductase complex assembly factor 2 OS=Homo sapiens (Human) OX=9606 GN=UQCC2 PE=1 SV=1;>sp|Q9BRT2|UQCC2_HUMAN Ubiquinol-cytochrome-c reductase complex assembly factor 2 OS=Homo sapiens (Human) OX=9606 GN=UQCC2 PE=1 SV=1;>tr|V5IRT4|V5IRT4_HUMAN Isoform of Q9BRT2, Ubiquinol-cytochrome-c reductase complex assembly factor 2 (Fragment) …	UQCC2	0.60142	0.103854	No	0.123053	No	-1.38882
E7ERI8;E7EW49;O75122-3	>tr|E7ERI8|E7ERI8_HUMAN Isoform of O75122, CLIP-associating protein 2 OS=Homo sapiens (Human) OX=9606 GN=CLASP2 PE=1 SV=1;>tr|E7EW49|E7EW49_HUMAN Isoform of O75122, CLIP-associating protein 2 OS=Homo sapiens (Human) OX=9606 GN=CLASP2 PE=1 SV=1;>sp|O75122-3|CLAP2-3_HUMAN Isoform of O75122, Isoform 3 of CLIP-associating protein 2 OS=Homo sapiens (Human) OX=9606 GN=CLASP2 PE=1 SV=3	CLASP2	0.870414	0.104381	No	0.123449	No	-1.38639
A0A087X2H6;Q8NE86;Q8NE86-2;Q8NE86-3	>tr|A0A087X2H6|A0A087X2H6_HUMAN Calcium uniporter protein, mitochondrial OS=Homo sapiens GN=MCU PE=1 SV=1;>sp|Q8NE86|MCU_HUMAN Calcium uniporter protein, mitochondrial OS=Homo sapiens (Human) OX=9606 GN=MCU PE=1 SV=1;>sp|Q8NE86-2|MCU-2_HUMAN Isoform of Q8NE86, Isoform 2 of Calcium uniporter protein, mitochondrial OS=Homo sapiens (Human) OX=9606 GN=MCU PE=1 SV=1;>sp|Q8NE86-3|MCU-3_HUMAN Isoform of…	MCU	0.815163	0.104596	No	0.12358	No	-1.38552
Q9BVA0	>sp|Q9BVA0|KTNB1_HUMAN Katanin p80 WD40 repeat-containing subunit B1 OS=Homo sapiens (Human) OX=9606 GN=KATNB1 PE=1 SV=1	KATNB1	0.857374	0.105134	No	0.123969	No	-1.38331
Q96GD0	>sp|Q96GD0|PLPP_HUMAN Pyridoxal phosphate phosphatase OS=Homo sapiens (Human) OX=9606 GN=PDXP PE=1 SV=2	PDXP	1.22903	0.105119	No	0.123969	No	1.3834
O43752	>sp|O43752|STX6_HUMAN Syntaxin-6 OS=Homo sapiens (Human) OX=9606 GN=STX6 PE=1 SV=1	STX6	0.673975	0.105273	No	0.12401	No	-1.38269
H3BP28;Q99807;Q99807-2	>tr|H3BP28|H3BP28_HUMAN Isoform of Q99807, 5-demethoxyubiquinone hydroxylase, mitochondrial OS=Homo sapiens (Human) OX=9606 GN=COQ7 PE=1 SV=1;>sp|Q99807|COQ7_HUMAN 5-demethoxyubiquinone hydroxylase, mitochondrial OS=Homo sapiens (Human) OX=9606 GN=COQ7 PE=1 SV=3;>sp|Q99807-2|COQ7-2_HUMAN Isoform of Q99807, Isoform 2 of 5-demethoxyubiquinone hydroxylase, mitochondrial OS=Homo sapiens (Human) OX=96…	COQ7	0.750511	0.105547	No	0.124126	No	-1.38152
Q9H1V8	>sp|Q9H1V8|S6A17_HUMAN Sodium-dependent neutral amino acid transporter SLC6A17 OS=Homo sapiens (Human) OX=9606 GN=SLC6A17 PE=1 SV=3	SLC6A17	1.21503	0.10558	No	0.124126	No	1.38136
B4DW73;H0YML5;Q16822	>tr|B4DW73|B4DW73_HUMAN Phosphoenolpyruvate carboxykinase [GTP], mitochondrial OS=Homo sapiens GN=PCK2 PE=1 SV=1;>tr|H0YML5|H0YML5_HUMAN Isoform of Q16822, Phosphoenolpyruvate carboxykinase [GTP], mitochondrial OS=Homo sapiens (Human) OX=9606 GN=PCK2 PE=1 SV=1;>sp|Q16822|PCKGM_HUMAN Phosphoenolpyruvate carboxykinase [GTP], mitochondrial OS=Homo sapiens (Human) OX=9606 GN=PCK2 PE=1 SV=4	PCK2	1.33892	0.10572	No	0.124167	No	1.38081
A0A087WT12;A0A087X2I2;K7ERP4;P36969;P36969-2	>tr|A0A087WT12|A0A087WT12_HUMAN Isoform of P36969, Glutathione peroxidase OS=Homo sapiens (Human) OX=9606 GN=GPX4 PE=1 SV=1;>tr|A0A087X2I2|A0A087X2I2_HUMAN Isoform of P36969, Glutathione peroxidase OS=Homo sapiens (Human) OX=9606 GN=GPX4 PE=1 SV=1;>tr|K7ERP4|K7ERP4_HUMAN Isoform of P36969, Glutathione peroxidase (Fragment) OS=Homo sapiens (Human) OX=9606 GN=GPX4 PE=1 SV=1;>sp|P36969|GPX4_HUMAN Ph…	GPX4	1.33193	0.106211	No	0.124393	No	1.37885
P33402;P33402-2;P33402-3	>sp|P33402|GCYA2_HUMAN Guanylate cyclase soluble subunit alpha-2 OS=Homo sapiens (Human) OX=9606 GN=GUCY1A2 PE=1 SV=1;>sp|P33402-2|GCYA2-2_HUMAN Isoform of P33402, Isoform 2 of Guanylate cyclase soluble subunit alpha-2 OS=Homo sapiens (Human) OX=9606 GN=GUCY1A2 PE=2 SV=1;>sp|P33402-3|GCYA2-3_HUMAN Isoform of P33402, Isoform 3 of Guanylate cyclase soluble subunit alpha-2 OS=Homo sapiens (Human) OX…	GUCY1A2	0.808082	0.10604	No	0.124393	No	-1.37954
P14649	>sp|P14649|MYL6B_HUMAN Myosin light chain 6B OS=Homo sapiens (Human) OX=9606 GN=MYL6B PE=1 SV=1	MYL6B	0.783271	0.106227	No	0.124393	No	-1.37878
O75382;O75382-2	>sp|O75382|TRIM3_HUMAN Tripartite motif-containing protein 3 OS=Homo sapiens (Human) OX=9606 GN=TRIM3 PE=1 SV=2;>sp|O75382-2|TRIM3-2_HUMAN Isoform of O75382, Isoform Beta of Tripartite motif-containing protein 3 OS=Homo sapiens (Human) OX=9606 GN=TRIM3 PE=1 SV=2	TRIM3	0.818876	0.106921	No	0.125083	No	-1.37598
C9JFR7;P99999	>tr|C9JFR7|C9JFR7_HUMAN Isoform of P99999, Cytochrome c domain-containing protein (Fragment) OS=Homo sapiens (Human) OX=9606 GN=CYCS PE=1 SV=1;>sp|P99999|CYC_HUMAN Cytochrome c OS=Homo sapiens (Human) OX=9606 GN=CYCS PE=1 SV=2	CYCS	0.625681	0.107333	No	0.125395	No	-1.37431
Q6GMV3	>sp|Q6GMV3|PTRD1_HUMAN Putative peptidyl-tRNA hydrolase PTRHD1 OS=Homo sapiens (Human) OX=9606 GN=PTRHD1 PE=1 SV=1	PTRHD1	2.7219	0.1074	No	0.125395	No	1.37401
F5H4U6;Q96GR2	>tr|F5H4U6|F5H4U6_HUMAN Isoform of Q96GR2, AMP-binding domain-containing protein OS=Homo sapiens (Human) OX=9606 GN=ACSBG1 PE=1 SV=1;>sp|Q96GR2|ACBG1_HUMAN Long-chain-fatty-acid--CoA ligase ACSBG1 OS=Homo sapiens (Human) OX=9606 GN=ACSBG1 PE=1 SV=2	ACSBG1	1.27587	0.107525	No	0.125418	No	1.37348
E7ETB3;Q9ULA0	>tr|E7ETB3|E7ETB3_HUMAN Isoform of Q9ULA0, Aspartyl aminopeptidase OS=Homo sapiens (Human) OX=9606 GN=DNPEP PE=1 SV=2;>sp|Q9ULA0|DNPEP_HUMAN Aspartyl aminopeptidase OS=Homo sapiens (Human) OX=9606 GN=DNPEP PE=1 SV=1	DNPEP	1.24206	0.107732	No	0.125536	No	1.37269
Q15276	>sp|Q15276|RABE1_HUMAN Rab GTPase-binding effector protein 1 OS=Homo sapiens (Human) OX=9606 GN=RABEP1 PE=1 SV=2	RABEP1	0.842418	0.108037	No	0.125617	No	-1.37146
G5E933;O95248;O95248-4	>tr|G5E933|G5E933_HUMAN Myotubularin-related protein 5 OS=Homo sapiens GN=SBF1 PE=4 SV=1;>sp|O95248|MTMR5_HUMAN Myotubularin-related protein 5 OS=Homo sapiens (Human) OX=9606 GN=SBF1 PE=1 SV=4;>sp|O95248-4|MTMR5-4_HUMAN Isoform of O95248, Isoform 4 of Myotubularin-related protein 5 OS=Homo sapiens (Human) OX=9606 GN=SBF1 PE=1 SV=4	SBF1	0.854214	0.108118	No	0.125617	No	-1.37116
A0A0A0MRE6;O94967;O94967-2;O94967-3;O94967-4	>tr|A0A0A0MRE6|A0A0A0MRE6_HUMAN Isoform of O94967, WD repeat-containing protein 47 OS=Homo sapiens (Human) OX=9606 GN=WDR47 PE=1 SV=1;>sp|O94967|WDR47_HUMAN WD repeat-containing protein 47 OS=Homo sapiens (Human) OX=9606 GN=WDR47 PE=1 SV=1;>sp|O94967-2|WDR47-2_HUMAN Isoform of O94967, Isoform 2 of WD repeat-containing protein 47 OS=Homo sapiens (Human) OX=9606 GN=WDR47 PE=1 SV=1;>sp|O94967-3|WDR4…	WDR47	0.840245	0.107909	No	0.125617	No	-1.37197
E5RFM9;E7ET87;E7EVI4;H0YAY0;O75410;O75410-2;O75410	NA	TACC1	0.753137	0.108239	No	0.125634	No	-1.37062
C9J240;E7EW28;F8WDX9;Q6U841;Q6U841-2	>tr|C9J240|C9J240_HUMAN Isoform of Q6U841, Anion exchange protein OS=Homo sapiens (Human) OX=9606 GN=SLC4A10 PE=1 SV=1;>tr|E7EW28|E7EW28_HUMAN Isoform of Q6U841, Anion exchange protein OS=Homo sapiens (Human) OX=9606 GN=SLC4A10 PE=1 SV=1;>tr|F8WDX9|F8WDX9_HUMAN Isoform of Q6U841, Band_3_cyto domain-containing protein OS=Homo sapiens (Human) OX=9606 GN=SLC4A10 PE=1 SV=1;>sp|Q6U841|S4A10_HUMAN Sodi…	SLC4A10	0.752989	0.108439	No	0.125744	No	-1.36977
A0A087WUW9;Q9NXU5	>tr|A0A087WUW9|A0A087WUW9_HUMAN Isoform of Q9NXU5, ADP-ribosylation factor-like protein 15 OS=Homo sapiens (Human) OX=9606 GN=ARL15 PE=1 SV=1;>sp|Q9NXU5|ARL15_HUMAN ADP-ribosylation factor-like protein 15 OS=Homo sapiens (Human) OX=9606 GN=ARL15 PE=1 SV=1	ARL15	0.82646	0.109855	No	0.127201	No	-1.36406
Q8WVH0	>sp|Q8WVH0|CPLX3_HUMAN Complexin-3 OS=Homo sapiens (Human) OX=9606 GN=CPLX3 PE=2 SV=1	CPLX3	1.52715	0.110153	No	0.127201	No	1.36285
Q9H3Z4;Q9H3Z4-2	>sp|Q9H3Z4|DNJC5_HUMAN DnaJ homolog subfamily C member 5 OS=Homo sapiens (Human) OX=9606 GN=DNAJC5 PE=1 SV=1;>sp|Q9H3Z4-2|DNJC5-2_HUMAN Isoform of Q9H3Z4, Isoform 2 of DnaJ homolog subfamily C member 5 OS=Homo sapiens (Human) OX=9606 GN=DNAJC5 PE=1 SV=1	DNAJC5	0.783803	0.110232	No	0.127201	No	-1.3625
P17987	>sp|P17987|TCPA_HUMAN T-complex protein 1 subunit alpha OS=Homo sapiens (Human) OX=9606 GN=TCP1 PE=1 SV=1	TCP1	0.859572	0.110155	No	0.127201	No	-1.36285
Q15836	>sp|Q15836|VAMP3_HUMAN Vesicle-associated membrane protein 3 OS=Homo sapiens (Human) OX=9606 GN=VAMP3 PE=1 SV=3	VAMP3	1.31947	0.109959	No	0.127201	No	1.3636
P56385	>sp|P56385|ATP5I_HUMAN ATP synthase subunit e, mitochondrial OS=Homo sapiens (Human) OX=9606 GN=ATP5ME PE=1 SV=2	ATP5ME	0.434982	0.110353	No	0.127217	No	-1.36198
Q9Y230;Q9Y230-2	>sp|Q9Y230|RUVB2_HUMAN RuvB-like 2 OS=Homo sapiens (Human) OX=9606 GN=RUVBL2 PE=1 SV=3;>sp|Q9Y230-2|RUVB2-2_HUMAN Isoform of Q9Y230, Isoform 2 of RuvB-like 2 OS=Homo sapiens (Human) OX=9606 GN=RUVBL2 PE=1 SV=3	RUVBL2	1.22183	0.111351	No	0.128243	No	1.35809
E7EQV9;E7EX53;P61313;P61313-2	>tr|E7EQV9|E7EQV9_HUMAN Isoform of P61313, Ribosomal protein L15 (Fragment) OS=Homo sapiens (Human) OX=9606 GN=RPL15 PE=1 SV=1;>tr|E7EX53|E7EX53_HUMAN Isoform of P61313, Ribosomal protein L15 (Fragment) OS=Homo sapiens (Human) OX=9606 GN=RPL15 PE=1 SV=1;>sp|P61313|RL15_HUMAN 60S ribosomal protein L15 OS=Homo sapiens (Human) OX=9606 GN=RPL15 PE=1 SV=2;>sp|P61313-2|RL15-2_HUMAN Isoform of P61313, I…	RPL15	1.29575	0.11165	No	0.128371	No	1.3568
O95219	>sp|O95219|SNX4_HUMAN Sorting nexin-4 OS=Homo sapiens (Human) OX=9606 GN=SNX4 PE=1 SV=1	SNX4	0.778209	0.111677	No	0.128371	No	-1.35666
Q8N461	>sp|Q8N461|FXL16_HUMAN F-box/LRR-repeat protein 16 OS=Homo sapiens (Human) OX=9606 GN=FBXL16 PE=2 SV=2	FBXL16	0.772773	0.111895	No	0.128496	No	-1.35588
O95870;O95870-2	>sp|O95870|ABHGA_HUMAN Phosphatidylserine lipase ABHD16A OS=Homo sapiens (Human) OX=9606 GN=ABHD16A PE=1 SV=3;>sp|O95870-2|ABHGA-2_HUMAN Isoform of O95870, Isoform 2 of Phosphatidylserine lipase ABHD16A OS=Homo sapiens (Human) OX=9606 GN=ABHD16A PE=1 SV=3	ABHD16A	0.791683	0.11266	No	0.129092	No	-1.35266
P07954;P07954-2	>sp|P07954|FUMH_HUMAN Fumarate hydratase, mitochondrial OS=Homo sapiens (Human) OX=9606 GN=FH PE=1 SV=3;>sp|P07954-2|FUMH-2_HUMAN Isoform of P07954, Isoform Cytoplasmic of Fumarate hydratase, mitochondrial OS=Homo sapiens (Human) OX=9606 GN=FH PE=1 SV=3	FH	0.815637	0.112658	No	0.129092	No	-1.35266
Q8TBB6	>sp|Q8TBB6|S7A14_HUMAN Probable cationic amino acid transporter OS=Homo sapiens (Human) OX=9606 GN=SLC7A14 PE=2 SV=3	SLC7A14	1.67134	0.11274	No	0.129092	No	1.3523
Q8TD08;Q8TD08-2;Q8TD08-3	>sp|Q8TD08|MK15_HUMAN Mitogen-activated protein kinase 15 OS=Homo sapiens (Human) OX=9606 GN=MAPK15 PE=1 SV=1;>sp|Q8TD08-2|MK15-2_HUMAN Isoform of Q8TD08, Isoform 2 of Mitogen-activated protein kinase 15 OS=Homo sapiens (Human) OX=9606 GN=MAPK15 PE=1 SV=1;>sp|Q8TD08-3|MK15-3_HUMAN Isoform of Q8TD08, Isoform 3 of Mitogen-activated protein kinase 15 OS=Homo sapiens (Human) OX=9606 GN=MAPK15 PE=1 SV…	MAPK15	1.93786	0.11294	No	0.129197	No	1.35156
Q13033;Q13033-2	>sp|Q13033|STRN3_HUMAN Striatin-3 OS=Homo sapiens (Human) OX=9606 GN=STRN3 PE=1 SV=3;>sp|Q13033-2|STRN3-2_HUMAN Isoform of Q13033, Isoform Alpha of Striatin-3 OS=Homo sapiens (Human) OX=9606 GN=STRN3 PE=1 SV=3	STRN3	0.839394	0.113982	No	0.130263	No	-1.34758
P54727	>sp|P54727|RD23B_HUMAN UV excision repair protein RAD23 homolog B OS=Homo sapiens (Human) OX=9606 GN=RAD23B PE=1 SV=1	RAD23B	0.787742	0.114318	No	0.130521	No	-1.34638
Q5T6H7;Q9NQW7;Q9NQW7-3	>tr|Q5T6H7|Q5T6H7_HUMAN Isoform of Q9NQW7, Xaa-Pro aminopeptidase 1 OS=Homo sapiens (Human) OX=9606 GN=XPNPEP1 PE=1 SV=1;>sp|Q9NQW7|XPP1_HUMAN Xaa-Pro aminopeptidase 1 OS=Homo sapiens (Human) OX=9606 GN=XPNPEP1 PE=1 SV=3;>sp|Q9NQW7-3|XPP1-3_HUMAN Isoform of Q9NQW7, Isoform 3 of Xaa-Pro aminopeptidase 1 OS=Homo sapiens (Human) OX=9606 GN=XPNPEP1 PE=1 SV=3	XPNPEP1	1.50844	0.1152	No	0.131402	No	1.34291
Q5VT94;Q9H3K2	>tr|Q5VT94|Q5VT94_HUMAN Growth hormone-inducible transmembrane protein OS=Homo sapiens GN=GHITM PE=1 SV=1;>sp|Q9H3K2|GHITM_HUMAN Growth hormone-inducible transmembrane protein OS=Homo sapiens (Human) OX=9606 GN=GHITM PE=1 SV=2	GHITM	1.51034	0.11582	No	0.131983	No	1.34057
P78371	>sp|P78371|TCPB_HUMAN T-complex protein 1 subunit beta OS=Homo sapiens (Human) OX=9606 GN=CCT2 PE=1 SV=4	CCT2	0.85889	0.116756	No	0.132921	No	-1.3371
P05109	>sp|P05109|S10A8_HUMAN Protein S100-A8 OS=Homo sapiens (Human) OX=9606 GN=S100A8 PE=1 SV=1	S100A8	1.91094	0.117316	No	0.133431	No	1.33496
O00154;O00154-4;O00154-6;O00154-7	>sp|O00154|BACH_HUMAN Cytosolic acyl coenzyme A thioester hydrolase OS=Homo sapiens (Human) OX=9606 GN=ACOT7 PE=1 SV=3;>sp|O00154-4|BACH-4_HUMAN Isoform of O00154, Isoform 4 of Cytosolic acyl coenzyme A thioester hydrolase OS=Homo sapiens (Human) OX=9606 GN=ACOT7 PE=1 SV=3;>sp|O00154-6|BACH-6_HUMAN Isoform of O00154, Isoform 6 of Cytosolic acyl coenzyme A thioester hydrolase OS=Homo sapiens (Huma…	ACOT7	0.856486	0.117645	No	0.133677	No	-1.33364
Q92598;Q92598-2;Q92598-3	>sp|Q92598|HS105_HUMAN Heat shock protein 105 kDa OS=Homo sapiens (Human) OX=9606 GN=HSPH1 PE=1 SV=1;>sp|Q92598-2|HS105-2_HUMAN Isoform of Q92598, Isoform Beta of Heat shock protein 105 kDa OS=Homo sapiens (Human) OX=9606 GN=HSPH1 PE=1 SV=1;>sp|Q92598-3|HS105-3_HUMAN Isoform of Q92598, Isoform 3 of Heat shock protein 105 kDa OS=Homo sapiens (Human) OX=9606 GN=HSPH1 PE=1 SV=1	HSPH1	0.855675	0.117989	No	0.133812	No	-1.33224
D3DPN2;O75056	>tr|D3DPN2|D3DPN2_HUMAN Isoform of O75056, Syndecan OS=Homo sapiens (Human) OX=9606 GN=SDC3 PE=1 SV=1;>sp|O75056|SDC3_HUMAN Syndecan-3 OS=Homo sapiens (Human) OX=9606 GN=SDC3 PE=1 SV=2	SDC3	1.64446	0.117885	No	0.133812	No	1.33265
G3V1C3;Q9BZZ5;Q9BZZ5-2;Q9BZZ5-3	>tr|G3V1C3|G3V1C3_HUMAN Isoform of Q9BZZ5, Apoptosis inhibitor 5 OS=Homo sapiens (Human) OX=9606 GN=API5 PE=1 SV=1;>sp|Q9BZZ5|API5_HUMAN Apoptosis inhibitor 5 OS=Homo sapiens (Human) OX=9606 GN=API5 PE=1 SV=3;>sp|Q9BZZ5-2|API5-2_HUMAN Isoform of Q9BZZ5, Isoform 2 of Apoptosis inhibitor 5 OS=Homo sapiens (Human) OX=9606 GN=API5 PE=1 SV=3;>sp|Q9BZZ5-3|API5-3_HUMAN Isoform of Q9BZZ5, Isoform 3 of Ap…	API5	0.651457	0.118551	No	0.134049	No	-1.33007
P08238	>sp|P08238|HS90B_HUMAN Heat shock protein HSP 90-beta OS=Homo sapiens (Human) OX=9606 GN=HSP90AB1 PE=1 SV=4	HSP90AB1	0.838962	0.118762	No	0.134049	No	-1.32929
P42704	>sp|P42704|LPPRC_HUMAN Leucine-rich PPR motif-containing protein, mitochondrial OS=Homo sapiens (Human) OX=9606 GN=LRPPRC PE=1 SV=3	LRPPRC	0.874937	0.118328	No	0.134049	No	-1.33095
O95563;Q5R3B4	>sp|O95563|MPC2_HUMAN Mitochondrial pyruvate carrier 2 OS=Homo sapiens (Human) OX=9606 GN=MPC2 PE=1 SV=1;>tr|Q5R3B4|Q5R3B4_HUMAN Isoform of O95563, Mitochondrial pyruvate carrier (Fragment) OS=Homo sapiens (Human) OX=9606 GN=MPC2 PE=1 SV=1	MPC2	0.841609	0.118589	No	0.134049	No	-1.32994
P00846	>sp|P00846|ATP6_HUMAN ATP synthase subunit a OS=Homo sapiens (Human) OX=9606 GN=MT-ATP6 PE=1 SV=1	MT-ATP6	0.81007	0.118743	No	0.134049	No	-1.32936
O43143	>sp|O43143|DHX15_HUMAN Pre-mRNA-splicing factor ATP-dependent RNA helicase DHX15 OS=Homo sapiens (Human) OX=9606 GN=DHX15 PE=1 SV=2	DHX15	1.25496	0.119713	No	0.134994	No	1.3257
Q02252;Q02252-2	>sp|Q02252|MMSA_HUMAN Methylmalonate-semialdehyde dehydrogenase [acylating], mitochondrial OS=Homo sapiens (Human) OX=9606 GN=ALDH6A1 PE=1 SV=2;>sp|Q02252-2|MMSA-2_HUMAN Isoform of Q02252, Isoform 2 of Methylmalonate-semialdehyde dehydrogenase [acylating], mitochondrial OS=Homo sapiens (Human) OX=9606 GN=ALDH6A1 PE=1 SV=2	ALDH6A1	1.37828	0.120278	No	0.135374	No	1.32355
P05198	>sp|P05198|IF2A_HUMAN Eukaryotic translation initiation factor 2 subunit 1 OS=Homo sapiens (Human) OX=9606 GN=EIF2S1 PE=1 SV=3	EIF2S1	1.25833	0.120212	No	0.135374	No	1.32377
Q9Y5J7	>sp|Q9Y5J7|TIM9_HUMAN Mitochondrial import inner membrane translocase subunit Tim9 OS=Homo sapiens (Human) OX=9606 GN=TIMM9 PE=1 SV=1	TIMM9	0.682226	0.120921	No	0.135968	No	-1.32114
O00442;O00442-2	>sp|O00442|RTCA_HUMAN RNA 3'-terminal phosphate cyclase OS=Homo sapiens (Human) OX=9606 GN=RTCA PE=1 SV=1;>sp|O00442-2|RTCA-2_HUMAN Isoform of O00442, Isoform 2 of RNA 3'-terminal phosphate cyclase OS=Homo sapiens (Human) OX=9606 GN=RTCA PE=1 SV=1	RTCA	0.774295	0.121405	No	0.136383	No	-1.31928
H7C3T4;Q13162	>tr|H7C3T4|H7C3T4_HUMAN Isoform of Q13162, Thioredoxin domain-containing protein (Fragment) OS=Homo sapiens (Human) OX=9606 GN=PRDX4 PE=1 SV=1;>sp|Q13162|PRDX4_HUMAN Peroxiredoxin-4 OS=Homo sapiens (Human) OX=9606 GN=PRDX4 PE=1 SV=1	PRDX4	1.39387	0.121775	No	0.13667	No	1.31798
A0A087X020;Q9Y3A5	>tr|A0A087X020|A0A087X020_HUMAN Isoform of Q9Y3A5, Ribosome maturation protein SBDS OS=Homo sapiens (Human) OX=9606 GN=SBDS PE=1 SV=1;>sp|Q9Y3A5|SBDS_HUMAN Ribosome maturation protein SBDS OS=Homo sapiens (Human) OX=9606 GN=SBDS PE=1 SV=4	SBDS	1.21758	0.121948	No	0.136735	No	1.31732
Q6PI78	>sp|Q6PI78|TMM65_HUMAN Transmembrane protein 65 OS=Homo sapiens (Human) OX=9606 GN=TMEM65 PE=1 SV=2	TMEM65	0.851904	0.122379	No	0.137089	No	-1.3157
Q15233;Q15233-2	>sp|Q15233|NONO_HUMAN Non-POU domain-containing octamer-binding protein OS=Homo sapiens (Human) OX=9606 GN=NONO PE=1 SV=4;>sp|Q15233-2|NONO-2_HUMAN Isoform of Q15233, Isoform 2 of Non-POU domain-containing octamer-binding protein OS=Homo sapiens (Human) OX=9606 GN=NONO PE=1 SV=4	NONO	0.80068	0.123092	No	0.137757	No	-1.3131
A0A0A0MR60;G8JL96;Q13332;Q13332-2;Q13332-3;Q13332-	NA	PTPRS	0.854319	0.124013	No	0.138551	No	-1.30975
Q9BQA1;Q9BQA1-2	>sp|Q9BQA1|MEP50_HUMAN Methylosome protein 50 OS=Homo sapiens (Human) OX=9606 GN=WDR77 PE=1 SV=1;>sp|Q9BQA1-2|MEP50-2_HUMAN Isoform of Q9BQA1, Isoform 2 of Methylosome protein 50 OS=Homo sapiens (Human) OX=9606 GN=WDR77 PE=1 SV=1	WDR77	1.18382	0.124034	No	0.138551	No	1.30967
F8WJN3;Q16630;Q16630-2;Q16630-3	>tr|F8WJN3|F8WJN3_HUMAN Isoform of Q16630, RRM domain-containing protein OS=Homo sapiens (Human) OX=9606 GN=CPSF6 PE=1 SV=1;>sp|Q16630|CPSF6_HUMAN Cleavage and polyadenylation specificity factor subunit 6 OS=Homo sapiens (Human) OX=9606 GN=CPSF6 PE=1 SV=2;>sp|Q16630-2|CPSF6-2_HUMAN Isoform of Q16630, Isoform 2 of Cleavage and polyadenylation specificity factor subunit 6 OS=Homo sapiens (Human) OX…	CPSF6	0.705949	0.124436	No	0.138793	No	-1.30812
H0YMF9;H0YN81;Q9GZS3	>tr|H0YMF9|H0YMF9_HUMAN Isoform of Q9GZS3, WD_REPEATS_REGION domain-containing protein OS=Homo sapiens (Human) OX=9606 GN=WDR61 PE=1 SV=1;>tr|H0YN81|H0YN81_HUMAN Isoform of Q9GZS3, WD_REPEATS_REGION domain-containing protein (Fragment) OS=Homo sapiens (Human) OX=9606 GN=WDR61 PE=1 SV=1;>sp|Q9GZS3|WDR61_HUMAN WD repeat-containing protein 61 OS=Homo sapiens (Human) OX=9606 GN=WDR61 PE=1 SV=1	WDR61	1.51263	0.124485	No	0.138793	No	1.30797
P37235	>sp|P37235|HPCL1_HUMAN Hippocalcin-like protein 1 OS=Homo sapiens (Human) OX=9606 GN=HPCAL1 PE=1 SV=3	HPCAL1	0.790401	0.125163	No	0.139417	No	-1.30545
Q9ULR3	>sp|Q9ULR3|PPM1H_HUMAN Protein phosphatase 1H OS=Homo sapiens (Human) OX=9606 GN=PPM1H PE=1 SV=2	PPM1H	0.785091	0.126614	No	0.140902	No	-1.30031
P51572;P51572-2	>sp|P51572|BAP31_HUMAN B-cell receptor-associated protein 31 OS=Homo sapiens (Human) OX=9606 GN=BCAP31 PE=1 SV=3;>sp|P51572-2|BAP31-2_HUMAN Isoform of P51572, Isoform 2 of B-cell receptor-associated protein 31 OS=Homo sapiens (Human) OX=9606 GN=BCAP31 PE=1 SV=3	BCAP31	1.8583	0.126765	No	0.140939	No	1.29976
Q9UBB4;Q9UBB4-2	>sp|Q9UBB4|ATX10_HUMAN Ataxin-10 OS=Homo sapiens (Human) OX=9606 GN=ATXN10 PE=1 SV=1;>sp|Q9UBB4-2|ATX10-2_HUMAN Isoform of Q9UBB4, Isoform 2 of Ataxin-10 OS=Homo sapiens (Human) OX=9606 GN=ATXN10 PE=1 SV=1	ATXN10	0.654273	0.127098	No	0.141176	No	-1.29853
A0A0A0MR50;Q13619;Q13619-2	>tr|A0A0A0MR50|A0A0A0MR50_HUMAN Isoform of Q13619, CULLIN_2 domain-containing protein OS=Homo sapiens (Human) OX=9606 GN=CUL4A PE=1 SV=1;>sp|Q13619|CUL4A_HUMAN Cullin-4A OS=Homo sapiens (Human) OX=9606 GN=CUL4A PE=1 SV=3;>sp|Q13619-2|CUL4A-2_HUMAN Isoform of Q13619, Isoform 2 of Cullin-4A OS=Homo sapiens (Human) OX=9606 GN=CUL4A PE=1 SV=3	CUL4A	0.640708	0.12805	No	0.142101	No	-1.29515
B7Z645;O60506;O60506-2;O60506-3;O60506-4	>tr|B7Z645|B7Z645_HUMAN Isoform of O60506, Heterogeneous nuclear ribonucleoprotein Q OS=Homo sapiens (Human) OX=9606 GN=SYNCRIP PE=1 SV=1;>sp|O60506|HNRPQ_HUMAN Heterogeneous nuclear ribonucleoprotein Q OS=Homo sapiens (Human) OX=9606 GN=SYNCRIP PE=1 SV=2;>sp|O60506-2|HNRPQ-2_HUMAN Isoform of O60506, Isoform 2 of Heterogeneous nuclear ribonucleoprotein Q OS=Homo sapiens (Human) OX=9606 GN=SYNCRIP…	SYNCRIP	0.819121	0.128277	No	0.142219	No	-1.29433
O15144	>sp|O15144|ARPC2_HUMAN Actin-related protein 2/3 complex subunit 2 OS=Homo sapiens (Human) OX=9606 GN=ARPC2 PE=1 SV=1	ARPC2	1.12737	0.128828	No	0.142564	No	1.29233
Q92499	>sp|Q92499|DDX1_HUMAN ATP-dependent RNA helicase DDX1 OS=Homo sapiens (Human) OX=9606 GN=DDX1 PE=1 SV=2	DDX1	0.84592	0.128762	No	0.142564	No	-1.29255
O95670	>sp|O95670|VATG2_HUMAN V-type proton ATPase subunit G 2 OS=Homo sapiens (Human) OX=9606 GN=ATP6V1G2 PE=1 SV=1	ATP6V1G2	0.760103	0.129286	No	0.142589	No	-1.29074
Q92882	>sp|Q92882|OSTF1_HUMAN Osteoclast-stimulating factor 1 OS=Homo sapiens (Human) OX=9606 GN=OSTF1 PE=1 SV=2	OSTF1	0.839231	0.12927	No	0.142589	No	-1.2908
P62753	>sp|P62753|RS6_HUMAN 40S ribosomal protein S6 OS=Homo sapiens (Human) OX=9606 GN=RPS6 PE=1 SV=1	RPS6	1.36537	0.129242	No	0.142589	No	1.29089
Q13630	>sp|Q13630|FCL_HUMAN GDP-L-fucose synthase OS=Homo sapiens (Human) OX=9606 GN=TSTA3 PE=1 SV=1	TSTA3	1.2743	0.129442	No	0.142589	No	1.29018
Q14694;Q14694-2;Q14694-3	>sp|Q14694|UBP10_HUMAN Ubiquitin carboxyl-terminal hydrolase 10 OS=Homo sapiens (Human) OX=9606 GN=USP10 PE=1 SV=2;>sp|Q14694-2|UBP10-2_HUMAN Isoform of Q14694, Isoform 2 of Ubiquitin carboxyl-terminal hydrolase 10 OS=Homo sapiens (Human) OX=9606 GN=USP10 PE=1 SV=2;>sp|Q14694-3|UBP10-3_HUMAN Isoform of Q14694, Isoform 3 of Ubiquitin carboxyl-terminal hydrolase 10 OS=Homo sapiens (Human) OX=9606 G…	USP10	0.633177	0.129451	No	0.142589	No	-1.29014
Q9BPX5	>sp|Q9BPX5|ARP5L_HUMAN Actin-related protein 2/3 complex subunit 5-like protein OS=Homo sapiens (Human) OX=9606 GN=ARPC5L PE=1 SV=1	ARPC5L	0.842501	0.129673	No	0.142702	No	-1.28934
P78417	>sp|P78417|GSTO1_HUMAN Glutathione S-transferase omega-1 OS=Homo sapiens (Human) OX=9606 GN=GSTO1 PE=1 SV=2	GSTO1	1.16123	0.129906	No	0.142826	No	1.2886
H0Y4R1;P12268	>tr|H0Y4R1|H0Y4R1_HUMAN Isoform of P12268, Inosine-5'-monophosphate dehydrogenase 2 (Fragment) OS=Homo sapiens (Human) OX=9606 GN=IMPDH2 PE=1 SV=1;>sp|P12268|IMDH2_HUMAN Inosine-5'-monophosphate dehydrogenase 2 OS=Homo sapiens (Human) OX=9606 GN=IMPDH2 PE=1 SV=2	IMPDH2	1.26493	0.130139	No	0.142949	No	1.28777
O15230	>sp|O15230|LAMA5_HUMAN Laminin subunit alpha-5 OS=Homo sapiens (Human) OX=9606 GN=LAMA5 PE=1 SV=8	LAMA5	2.06559	0.130268	No	0.142959	No	1.28731
K7ESP4;Q8WVC6	>tr|K7ESP4|K7ESP4_HUMAN Isoform of Q8WVC6, Dephospho-CoA kinase domain-containing protein (Fragment) OS=Homo sapiens (Human) OX=9606 GN=DCAKD PE=1 SV=1;>sp|Q8WVC6|DCAKD_HUMAN Dephospho-CoA kinase domain-containing protein OS=Homo sapiens (Human) OX=9606 GN=DCAKD PE=1 SV=1	DCAKD	1.34739	0.130697	No	0.143165	No	1.28578
P84074	>sp|P84074|HPCA_HUMAN Neuron-specific calcium-binding protein hippocalcin OS=Homo sapiens (Human) OX=9606 GN=HPCA PE=1 SV=2	HPCA	0.764111	0.130617	No	0.143165	No	-1.28604
A0A087X1E4;P53365;P53365-2;P53365-3	>tr|A0A087X1E4|A0A087X1E4_HUMAN Isoform of P53365, AH domain-containing protein OS=Homo sapiens (Human) OX=9606 GN=ARFIP2 PE=1 SV=1;>sp|P53365|ARFP2_HUMAN Arfaptin-2 OS=Homo sapiens (Human) OX=9606 GN=ARFIP2 PE=1 SV=1;>sp|P53365-2|ARFP2-2_HUMAN Isoform of P53365, Isoform 2 of Arfaptin-2 OS=Homo sapiens (Human) OX=9606 GN=ARFIP2 PE=1 SV=1;>sp|P53365-3|ARFP2-3_HUMAN Isoform of P53365, Isoform 3 of …	ARFIP2	0.853699	0.131208	No	0.143328	No	-1.28389
Q08378;Q08378-2	>sp|Q08378|GOGA3_HUMAN Golgin subfamily A member 3 OS=Homo sapiens (Human) OX=9606 GN=GOLGA3 PE=1 SV=2;>sp|Q08378-2|GOGA3-2_HUMAN Isoform of Q08378, Isoform 2 of Golgin subfamily A member 3 OS=Homo sapiens (Human) OX=9606 GN=GOLGA3 PE=1 SV=2	GOLGA3	0.68745	0.131179	No	0.143328	No	-1.28398
O75116	>sp|O75116|ROCK2_HUMAN Rho-associated protein kinase 2 OS=Homo sapiens (Human) OX=9606 GN=ROCK2 PE=1 SV=4	ROCK2	0.856557	0.13112	No	0.143328	No	-1.2842
Q13423	>sp|Q13423|NNTM_HUMAN NAD(P) transhydrogenase, mitochondrial OS=Homo sapiens (Human) OX=9606 GN=NNT PE=1 SV=3	NNT	0.856664	0.131476	No	0.143357	No	-1.28295
P60201	>sp|P60201|MYPR_HUMAN Myelin proteolipid protein OS=Homo sapiens (Human) OX=9606 GN=PLP1 PE=1 SV=2	PLP1	0.733731	0.131406	No	0.143357	No	-1.28319
P52907	>sp|P52907|CAZA1_HUMAN F-actin-capping protein subunit alpha-1 OS=Homo sapiens (Human) OX=9606 GN=CAPZA1 PE=1 SV=3	CAPZA1	1.69573	0.132122	No	0.143869	No	1.28077
O14531	>sp|O14531|DPYL4_HUMAN Dihydropyrimidinase-related protein 4 OS=Homo sapiens (Human) OX=9606 GN=DPYSL4 PE=1 SV=2	DPYSL4	0.812219	0.132188	No	0.143869	No	-1.28055
H0YAV1;Q7LG56;Q7LG56-2;Q7LG56-6	>tr|H0YAV1|H0YAV1_HUMAN Isoform of Q7LG56, Ribonucleoside-diphosphate reductase subunit M2 B (Fragment) OS=Homo sapiens (Human) OX=9606 GN=RRM2B PE=1 SV=1;>sp|Q7LG56|RIR2B_HUMAN Ribonucleoside-diphosphate reductase subunit M2 B OS=Homo sapiens (Human) OX=9606 GN=RRM2B PE=1 SV=1;>sp|Q7LG56-2|RIR2B-2_HUMAN Isoform of Q7LG56, Isoform 2 of Ribonucleoside-diphosphate reductase subunit M2 B OS=Homo sap…	RRM2B	0.632086	0.133376	No	0.145029	No	-1.2764
P03915	>sp|P03915|NU5M_HUMAN NADH-ubiquinone oxidoreductase chain 5 OS=Homo sapiens (Human) OX=9606 GN=MT-ND5 PE=1 SV=2	MT-ND5	0.77307	0.133505	No	0.145037	No	-1.27598
A0A087X2D0;P84103;P84103-2	>tr|A0A087X2D0|A0A087X2D0_HUMAN Isoform of P84103, RRM domain-containing protein OS=Homo sapiens (Human) OX=9606 GN=SRSF3 PE=1 SV=1;>sp|P84103|SRSF3_HUMAN Serine/arginine-rich splicing factor 3 OS=Homo sapiens (Human) OX=9606 GN=SRSF3 PE=1 SV=1;>sp|P84103-2|SRSF3-2_HUMAN Isoform of P84103, Isoform 2 of Serine/arginine-rich splicing factor 3 OS=Homo sapiens (Human) OX=9606 GN=SRSF3 PE=1 SV=1	SRSF3	1.14856	0.133748	No	0.145168	No	1.27518
A0A087WXM8;P50895	>tr|A0A087WXM8|A0A087WXM8_HUMAN Isoform of P50895, Basal cell adhesion molecule OS=Homo sapiens (Human) OX=9606 GN=BCAM PE=1 SV=1;>sp|P50895|BCAM_HUMAN Basal cell adhesion molecule OS=Homo sapiens (Human) OX=9606 GN=BCAM PE=1 SV=2	BCAM	1.42309	0.1339	No	0.1452	No	1.27468
O94819	>sp|O94819|KBTBB_HUMAN Kelch repeat and BTB domain-containing protein 11 OS=Homo sapiens (Human) OX=9606 GN=KBTBD11 PE=1 SV=1	KBTBD11	1.19085	0.134784	No	0.146025	No	1.27159
A0A087WZN1;O43837	>tr|A0A087WZN1|A0A087WZN1_HUMAN Isoform of O43837, Isocitrate dehydrogenase [NAD] subunit, mitochondrial OS=Homo sapiens (Human) OX=9606 GN=IDH3B PE=1 SV=1;>sp|O43837|IDH3B_HUMAN Isocitrate dehydrogenase [NAD] subunit beta, mitochondrial OS=Homo sapiens (Human) OX=9606 GN=IDH3B PE=1 SV=2	IDH3B	0.810059	0.134945	No	0.146067	No	-1.27102
Q14203;Q14203-6	>sp|Q14203|DCTN1_HUMAN Dynactin subunit 1 OS=Homo sapiens (Human) OX=9606 GN=DCTN1 PE=1 SV=3;>sp|Q14203-6|DCTN1-6_HUMAN Isoform of Q14203, Isoform 6 of Dynactin subunit 1 OS=Homo sapiens (Human) OX=9606 GN=DCTN1 PE=1 SV=3	DCTN1	0.886974	0.135244	No	0.146243	No	-1.27006
Q5JSH3;Q5JSH3-2	>sp|Q5JSH3|WDR44_HUMAN WD repeat-containing protein 44 OS=Homo sapiens (Human) OX=9606 GN=WDR44 PE=1 SV=1;>sp|Q5JSH3-2|WDR44-2_HUMAN Isoform of Q5JSH3, Isoform 2 of WD repeat-containing protein 44 OS=Homo sapiens (Human) OX=9606 GN=WDR44 PE=1 SV=1	WDR44	0.817275	0.135354	No	0.146243	No	-1.26969
P00738	>sp|P00738|HPT_HUMAN Haptoglobin OS=Homo sapiens (Human) OX=9606 GN=HP PE=1 SV=1	HP	1.64326	0.136378	No	0.147215	No	1.26622
O94973	>sp|O94973|AP2A2_HUMAN AP-2 complex subunit alpha-2 OS=Homo sapiens (Human) OX=9606 GN=AP2A2 PE=1 SV=2	AP2A2	0.893353	0.136533	No	0.147248	No	-1.2657
A0A0A0MTN0;Q13617;Q13617-2	>tr|A0A0A0MTN0|A0A0A0MTN0_HUMAN Isoform of Q13617, CULLIN_2 domain-containing protein OS=Homo sapiens (Human) OX=9606 GN=CUL2 PE=1 SV=1;>sp|Q13617|CUL2_HUMAN Cullin-2 OS=Homo sapiens (Human) OX=9606 GN=CUL2 PE=1 SV=2;>sp|Q13617-2|CUL2-2_HUMAN Isoform of Q13617, Isoform 2 of Cullin-2 OS=Homo sapiens (Human) OX=9606 GN=CUL2 PE=1 SV=2	CUL2	0.736738	0.137021	No	0.14764	No	-1.26412
Q15311	>sp|Q15311|RBP1_HUMAN RalA-binding protein 1 OS=Homo sapiens (Human) OX=9606 GN=RALBP1 PE=1 SV=3	RALBP1	0.823905	0.139477	No	0.15015	No	-1.25595
Q9UDT6	>sp|Q9UDT6|CLIP2_HUMAN CAP-Gly domain-containing linker protein 2 OS=Homo sapiens (Human) OX=9606 GN=CLIP2 PE=1 SV=1	CLIP2	0.886617	0.140441	No	0.150915	No	-1.25271
P28070	>sp|P28070|PSB4_HUMAN Proteasome subunit beta type-4 OS=Homo sapiens (Human) OX=9606 GN=PSMB4 PE=1 SV=4	PSMB4	1.23295	0.140391	No	0.150915	No	1.25288
E9PKZ0;P62917	>tr|E9PKZ0|E9PKZ0_HUMAN Isoform of P62917, Ribosomal_L2_C domain-containing protein (Fragment) OS=Homo sapiens (Human) OX=9606 GN=RPL8 PE=1 SV=1;>sp|P62917|RL8_HUMAN 60S ribosomal protein L8 OS=Homo sapiens (Human) OX=9606 GN=RPL8 PE=1 SV=2	RPL8	1.57229	0.140913	No	0.151148	No	1.25114
P04275	>sp|P04275|VWF_HUMAN von Willebrand factor OS=Homo sapiens (Human) OX=9606 GN=VWF PE=1 SV=4	VWF	1.78049	0.140869	No	0.151148	No	1.25129
Q15555;Q15555-3;Q15555-5	>sp|Q15555|MARE2_HUMAN Microtubule-associated protein RP/EB family member 2 OS=Homo sapiens (Human) OX=9606 GN=MAPRE2 PE=1 SV=1;>sp|Q15555-3|MARE2-3_HUMAN Isoform of Q15555, Isoform 3 of Microtubule-associated protein RP/EB family member 2 OS=Homo sapiens (Human) OX=9606 GN=MAPRE2 PE=1 SV=1;>sp|Q15555-5|MARE2-5_HUMAN Isoform of Q15555, Isoform 5 of Microtubule-associated protein RP/EB family memb…	MAPRE2	0.739015	0.142118	No	0.152189	No	-1.24717
P28331;P28331-2;P28331-4	>sp|P28331|NDUS1_HUMAN NADH-ubiquinone oxidoreductase 75 kDa subunit, mitochondrial OS=Homo sapiens (Human) OX=9606 GN=NDUFS1 PE=1 SV=3;>sp|P28331-2|NDUS1-2_HUMAN Isoform of P28331, Isoform 2 of NADH-ubiquinone oxidoreductase 75 kDa subunit, mitochondrial OS=Homo sapiens (Human) OX=9606 GN=NDUFS1 PE=1 SV=3;>sp|P28331-4|NDUS1-4_HUMAN Isoform of P28331, Isoform 4 of NADH-ubiquinone oxidoreductase 7…	NDUFS1	0.836213	0.14214	No	0.152189	No	-1.24709
B5ME97;E7EW69;E7EX04;F5GYV2;F5H1F2;Q9P0V9;Q9P0V9-2	NA	SEPTIN10	0.698433	0.142467	No	0.152402	No	-1.24598
P07858	>sp|P07858|CATB_HUMAN Cathepsin B OS=Homo sapiens (Human) OX=9606 GN=CTSB PE=1 SV=3	CTSB	1.25179	0.142611	No	0.152419	No	1.24554
Q92599	>sp|Q92599|SEPT8_HUMAN Septin-8 OS=Homo sapiens (Human) OX=9606 GN=SEPTIN8 PE=1 SV=4	SEPTIN8	1.14326	0.142885	No	0.152575	No	1.24465
P51674	>sp|P51674|GPM6A_HUMAN Neuronal membrane glycoprotein M6-a OS=Homo sapiens (Human) OX=9606 GN=GPM6A PE=1 SV=2	GPM6A	1.30639	0.143394	No	0.152755	No	1.24302
Q9NRV9	>sp|Q9NRV9|HEBP1_HUMAN Heme-binding protein 1 OS=Homo sapiens (Human) OX=9606 GN=HEBP1 PE=1 SV=1	HEBP1	1.40628	0.14344	No	0.152755	No	1.24287
J3KPX7;Q99623	>tr|J3KPX7|J3KPX7_HUMAN Isoform of Q99623, Prohibitin OS=Homo sapiens (Human) OX=9606 GN=PHB2 PE=1 SV=2;>sp|Q99623|PHB2_HUMAN Prohibitin-2 OS=Homo sapiens (Human) OX=9606 GN=PHB2 PE=1 SV=2	PHB2	0.839472	0.143272	No	0.152755	No	-1.24342
F5H5G1;H3BLU2;Q13449	>tr|F5H5G1|F5H5G1_HUMAN Isoform of Q13449, Limbic system-associated membrane protein OS=Homo sapiens (Human) OX=9606 GN=LSAMP PE=1 SV=2;>tr|H3BLU2|H3BLU2_HUMAN Isoform of Q13449, Limbic system-associated membrane protein (Fragment) OS=Homo sapiens (Human) OX=9606 GN=LSAMP PE=1 SV=1;>sp|Q13449|LSAMP_HUMAN Limbic system-associated membrane protein OS=Homo sapiens (Human) OX=9606 GN=LSAMP PE=1 SV=2	LSAMP	0.787623	0.144018	No	0.153233	No	-1.24106
Q99250;Q99250-2	>sp|Q99250|SCN2A_HUMAN Sodium channel protein type 2 subunit alpha OS=Homo sapiens (Human) OX=9606 GN=SCN2A PE=1 SV=3;>sp|Q99250-2|SCN2A-2_HUMAN Isoform of Q99250, Isoform 2 of Sodium channel protein type 2 subunit alpha OS=Homo sapiens (Human) OX=9606 GN=SCN2A PE=1 SV=3	SCN2A	0.823309	0.144535	No	0.153646	No	-1.23933
P23634-2;P23634-3;P23634-4;P23634-5	>sp|P23634-2|AT2B4-2_HUMAN Isoform of P23634, Isoform XA of Plasma membrane calcium-transporting ATPase 4 OS=Homo sapiens (Human) OX=9606 GN=ATP2B4 PE=1 SV=2;>sp|P23634-3|AT2B4-3_HUMAN Isoform of P23634, Isoform ZA of Plasma membrane calcium-transporting ATPase 4 OS=Homo sapiens (Human) OX=9606 GN=ATP2B4 PE=1 SV=2;>sp|P23634-4|AT2B4-4_HUMAN Isoform of P23634, Isoform XK of Plasma membrane calcium…	ATP2B4	1.26302	0.145075	No	0.153856	No	1.23757
Q9BWH2	>sp|Q9BWH2|FUND2_HUMAN FUN14 domain-containing protein 2 OS=Homo sapiens (Human) OX=9606 GN=FUNDC2 PE=1 SV=2	FUNDC2	0.855106	0.145121	No	0.153856	No	-1.23741
Q99598	>sp|Q99598|TSNAX_HUMAN Translin-associated protein X OS=Homo sapiens (Human) OX=9606 GN=TSNAX PE=1 SV=1	TSNAX	1.36744	0.144942	No	0.153856	No	1.23797
Q9BVK6	>sp|Q9BVK6|TMED9_HUMAN Transmembrane emp24 domain-containing protein 9 OS=Homo sapiens (Human) OX=9606 GN=TMED9 PE=1 SV=2	TMED9	1.16767	0.145281	No	0.153888	No	1.23686
P61026	>sp|P61026|RAB10_HUMAN Ras-related protein Rab-10 OS=Homo sapiens (Human) OX=9606 GN=RAB10 PE=1 SV=1	RAB10	1.24467	0.145667	No	0.154159	No	1.23558
Q14643;Q14643-2;Q14643-3;Q14643-4;Q14643-5;Q14643-	NA	ITPR1	0.810297	0.145924	No	0.154294	No	-1.23477
P29144	>sp|P29144|TPP2_HUMAN Tripeptidyl-peptidase 2 OS=Homo sapiens (Human) OX=9606 GN=TPP2 PE=1 SV=4	TPP2	0.746635	0.146089	No	0.154331	No	-1.23424
P42224;P42224-2	>sp|P42224|STAT1_HUMAN Signal transducer and activator of transcription 1-alpha/beta OS=Homo sapiens (Human) OX=9606 GN=STAT1 PE=1 SV=2;>sp|P42224-2|STAT1-2_HUMAN Isoform of P42224, Isoform Beta of Signal transducer and activator of transcription 1-alpha/beta OS=Homo sapiens (Human) OX=9606 GN=STAT1 PE=1 SV=2	STAT1	0.708863	0.14739	No	0.155566	No	-1.2301
Q9UPY6;Q9UPY6-2	>sp|Q9UPY6|WASF3_HUMAN Wiskott-Aldrich syndrome protein family member 3 OS=Homo sapiens (Human) OX=9606 GN=WASF3 PE=1 SV=2;>sp|Q9UPY6-2|WASF3-2_HUMAN Isoform of Q9UPY6, Isoform 2 of Wiskott-Aldrich syndrome protein family member 3 OS=Homo sapiens (Human) OX=9606 GN=WASF3 PE=1 SV=2	WASF3	0.689214	0.147533	No	0.155578	No	-1.22966
Q96E17	>sp|Q96E17|RAB3C_HUMAN Ras-related protein Rab-3C OS=Homo sapiens (Human) OX=9606 GN=RAB3C PE=1 SV=1	RAB3C	1.45071	0.148016	No	0.155812	No	1.22807
P15927;P15927-2;P15927-3	>sp|P15927|RFA2_HUMAN Replication protein A 32 kDa subunit OS=Homo sapiens (Human) OX=9606 GN=RPA2 PE=1 SV=1;>sp|P15927-2|RFA2-2_HUMAN Isoform of P15927, Isoform 2 of Replication protein A 32 kDa subunit OS=Homo sapiens (Human) OX=9606 GN=RPA2 PE=1 SV=1;>sp|P15927-3|RFA2-3_HUMAN Isoform of P15927, Isoform 3 of Replication protein A 32 kDa subunit OS=Homo sapiens (Human) OX=9606 GN=RPA2 PE=1 SV=1	RPA2	2.0326	0.14794	No	0.155812	No	1.22833
Q13491-4	>sp|Q13491-4|GPM6B-4_HUMAN Isoform of Q13491, Isoform 4 of Neuronal membrane glycoprotein M6-b OS=Homo sapiens (Human) OX=9606 GN=GPM6B PE=1 SV=2	GPM6B	1.28994	0.14824	No	0.155909	No	1.22732
Q9H4A4	>sp|Q9H4A4|AMPB_HUMAN Aminopeptidase B OS=Homo sapiens (Human) OX=9606 GN=RNPEP PE=1 SV=2	RNPEP	1.43046	0.14842	No	0.155961	No	1.22678
Q12756-2;Q12756-3	>sp|Q12756-2|KIF1A-2_HUMAN Isoform of Q12756, Isoform 2 of Kinesin-like protein KIF1A OS=Homo sapiens (Human) OX=9606 GN=KIF1A PE=1 SV=2;>sp|Q12756-3|KIF1A-3_HUMAN Isoform of Q12756, Isoform 3 of Kinesin-like protein KIF1A OS=Homo sapiens (Human) OX=9606 GN=KIF1A PE=1 SV=2	KIF1A	0.861948	0.148567	No	0.155977	No	-1.22634
Q9P2B2	>sp|Q9P2B2|FPRP_HUMAN Prostaglandin F2 receptor negative regulator OS=Homo sapiens (Human) OX=9606 GN=PTGFRN PE=1 SV=2	PTGFRN	0.770811	0.148997	No	0.15629	No	-1.22496
Q8WWC4	>sp|Q8WWC4|MAIP1_HUMAN m-AAA protease-interacting protein 1, mitochondrial OS=Homo sapiens (Human) OX=9606 GN=MAIP1 PE=1 SV=1	MAIP1	0.822113	0.149342	No	0.156376	No	-1.22388
P17858	>sp|P17858|PFKAL_HUMAN ATP-dependent 6-phosphofructokinase, liver type OS=Homo sapiens (Human) OX=9606 GN=PFKL PE=1 SV=6	PFKL	1.17075	0.14929	No	0.156376	No	1.22406
Q9Y6M9	>sp|Q9Y6M9|NDUB9_HUMAN NADH dehydrogenase [ubiquinone] 1 beta subcomplex subunit 9 OS=Homo sapiens (Human) OX=9606 GN=NDUFB9 PE=1 SV=3	NDUFB9	0.753788	0.149528	No	0.156432	No	-1.22333
P10809	>sp|P10809|CH60_HUMAN 60 kDa heat shock protein, mitochondrial OS=Homo sapiens (Human) OX=9606 GN=HSPD1 PE=1 SV=2	HSPD1	0.829534	0.149797	No	0.156576	No	-1.22241
Q01518;Q01518-2	>sp|Q01518|CAP1_HUMAN Adenylyl cyclase-associated protein 1 OS=Homo sapiens (Human) OX=9606 GN=CAP1 PE=1 SV=5;>sp|Q01518-2|CAP1-2_HUMAN Isoform of Q01518, Isoform 2 of Adenylyl cyclase-associated protein 1 OS=Homo sapiens (Human) OX=9606 GN=CAP1 PE=1 SV=5	CAP1	1.1712	0.150279	No	0.15668	No	1.2209
Q9UJ14	>sp|Q9UJ14|GGT7_HUMAN Glutathione hydrolase 7 OS=Homo sapiens (Human) OX=9606 GN=GGT7 PE=1 SV=2	GGT7	0.801363	0.150135	No	0.15668	No	-1.22136
Q9UHD9	>sp|Q9UHD9|UBQL2_HUMAN Ubiquilin-2 OS=Homo sapiens (Human) OX=9606 GN=UBQLN2 PE=1 SV=2	UBQLN2	0.732926	0.150292	No	0.15668	No	-1.22084
Q9HCH3	>sp|Q9HCH3|CPNE5_HUMAN Copine-5 OS=Homo sapiens (Human) OX=9606 GN=CPNE5 PE=1 SV=2	CPNE5	0.720154	0.150762	No	0.157031	No	-1.21938
Q07812;Q07812-2;Q07812-5;Q07812-7;Q07812-8	>sp|Q07812|BAX_HUMAN Apoptosis regulator BAX OS=Homo sapiens (Human) OX=9606 GN=BAX PE=1 SV=1;>sp|Q07812-2|BAX-2_HUMAN Isoform of Q07812, Isoform Beta of Apoptosis regulator BAX OS=Homo sapiens (Human) OX=9606 GN=BAX PE=1 SV=1;>sp|Q07812-5|BAX-5_HUMAN Isoform of Q07812, Isoform Epsilon of Apoptosis regulator BAX OS=Homo sapiens (Human) OX=9606 GN=BAX PE=1 SV=1;>sp|Q07812-7|BAX-7_HUMAN Isoform of …	BAX	0.704438	0.151114	No	0.157261	No	-1.21834
E7EPB3;P50914	>tr|E7EPB3|E7EPB3_HUMAN Isoform of P50914, Ribosomal_L14e domain-containing protein OS=Homo sapiens (Human) OX=9606 GN=RPL14 PE=1 SV=1;>sp|P50914|RL14_HUMAN 60S ribosomal protein L14 OS=Homo sapiens (Human) OX=9606 GN=RPL14 PE=1 SV=4	RPL14	1.34978	0.151677	No	0.157708	No	1.21656
A0A024R4E5;H0Y394;Q00341;Q00341-2	>tr|A0A024R4E5|A0A024R4E5_HUMAN Isoform of Q00341, High density lipoprotein binding protein (Vigilin), isoform CRA_a OS=Homo sapiens (Human) OX=9606 GN=HDLBP PE=1 SV=1;>tr|H0Y394|H0Y394_HUMAN Isoform of Q00341, Vigilin (Fragment) OS=Homo sapiens (Human) OX=9606 GN=HDLBP PE=1 SV=1;>sp|Q00341|VIGLN_HUMAN Vigilin OS=Homo sapiens (Human) OX=9606 GN=HDLBP PE=1 SV=2;>sp|Q00341-2|VIGLN-2_HUMAN Isoform o…	HDLBP	0.669084	0.15304	No	0.158855	No	-1.2123
Q15691	>sp|Q15691|MARE1_HUMAN Microtubule-associated protein RP/EB family member 1 OS=Homo sapiens (Human) OX=9606 GN=MAPRE1 PE=1 SV=3	MAPRE1	1.20297	0.153315	No	0.158855	No	1.21143
Q9UJZ1;Q9UJZ1-2	>sp|Q9UJZ1|STML2_HUMAN Stomatin-like protein 2, mitochondrial OS=Homo sapiens (Human) OX=9606 GN=STOML2 PE=1 SV=1;>sp|Q9UJZ1-2|STML2-2_HUMAN Isoform of Q9UJZ1, Isoform 2 of Stomatin-like protein 2, mitochondrial OS=Homo sapiens (Human) OX=9606 GN=STOML2 PE=1 SV=1	STOML2	0.798493	0.153207	No	0.158855	No	-1.21177
Q9BSF4	>sp|Q9BSF4|TIM29_HUMAN Mitochondrial import inner membrane translocase subunit Tim29 OS=Homo sapiens (Human) OX=9606 GN=TIMM29 PE=1 SV=2	TIMM29	0.858149	0.153261	No	0.158855	No	-1.2116
Q15046	>sp|Q15046|SYK_HUMAN Lysine--tRNA ligase OS=Homo sapiens (Human) OX=9606 GN=KARS1 PE=1 SV=3	KARS1	0.811433	0.154038	No	0.159323	No	-1.20922
Q14974	>sp|Q14974|IMB1_HUMAN Importin subunit beta-1 OS=Homo sapiens (Human) OX=9606 GN=KPNB1 PE=1 SV=2	KPNB1	1.14667	0.154347	No	0.159323	No	1.20827
Q9NQ48;Q9NQ48-2;Q9NQ48-3	>sp|Q9NQ48|LZTL1_HUMAN Leucine zipper transcription factor-like protein 1 OS=Homo sapiens (Human) OX=9606 GN=LZTFL1 PE=1 SV=1;>sp|Q9NQ48-2|LZTL1-2_HUMAN Isoform of Q9NQ48, Isoform 2 of Leucine zipper transcription factor-like protein 1 OS=Homo sapiens (Human) OX=9606 GN=LZTFL1 PE=1 SV=1;>sp|Q9NQ48-3|LZTL1-3_HUMAN Isoform of Q9NQ48, Isoform 3 of Leucine zipper transcription factor-like protein 1 O…	LZTFL1	0.851688	0.154222	No	0.159323	No	-1.20866
P46060	>sp|P46060|RAGP1_HUMAN Ran GTPase-activating protein 1 OS=Homo sapiens (Human) OX=9606 GN=RANGAP1 PE=1 SV=1	RANGAP1	0.83396	0.153937	No	0.159323	No	-1.20956
Q9H1Z4;Q9H1Z4-2	>sp|Q9H1Z4|WDR13_HUMAN WD repeat-containing protein 13 OS=Homo sapiens (Human) OX=9606 GN=WDR13 PE=1 SV=2;>sp|Q9H1Z4-2|WDR13-2_HUMAN Isoform of Q9H1Z4, Isoform 2 of WD repeat-containing protein 13 OS=Homo sapiens (Human) OX=9606 GN=WDR13 PE=1 SV=2	WDR13	1.34476	0.154438	No	0.159323	No	1.208
O75508	>sp|O75508|CLD11_HUMAN Claudin-11 OS=Homo sapiens (Human) OX=9606 GN=CLDN11 PE=1 SV=2	CLDN11	0.685661	0.15492	No	0.159543	No	-1.20653
H0YL69;H0YMZ1;P25789	>tr|H0YL69|H0YL69_HUMAN Isoform of P25789, Proteasome subunit alpha type (Fragment) OS=Homo sapiens (Human) OX=9606 GN=PSMA4 PE=1 SV=1;>tr|H0YMZ1|H0YMZ1_HUMAN Isoform of P25789, Proteasome subunit alpha type (Fragment) OS=Homo sapiens (Human) OX=9606 GN=PSMA4 PE=1 SV=8;>sp|P25789|PSA4_HUMAN Proteasome subunit alpha type-4 OS=Homo sapiens (Human) OX=9606 GN=PSMA4 PE=1 SV=1	PSMA4	1.15752	0.15479	No	0.159543	No	1.20695
P36542	>sp|P36542|ATPG_HUMAN ATP synthase subunit gamma, mitochondrial OS=Homo sapiens (Human) OX=9606 GN=ATP5F1C PE=1 SV=1	ATP5F1C	0.870866	0.15618	No	0.160562	No	-1.20259
P51659	>sp|P51659|DHB4_HUMAN Peroxisomal multifunctional enzyme type 2 OS=Homo sapiens (Human) OX=9606 GN=HSD17B4 PE=1 SV=3	HSD17B4	1.25842	0.156065	No	0.160562	No	1.20298
O43865	>sp|O43865|SAHH2_HUMAN S-adenosylhomocysteine hydrolase-like protein 1 OS=Homo sapiens (Human) OX=9606 GN=AHCYL1 PE=1 SV=2	AHCYL1	1.26758	0.156763	No	0.160883	No	1.20078
P62269	>sp|P62269|RS18_HUMAN 40S ribosomal protein S18 OS=Homo sapiens (Human) OX=9606 GN=RPS18 PE=1 SV=3	RPS18	1.25162	0.156725	No	0.160883	No	1.2009
E9PN17;O75964	>tr|E9PN17|E9PN17_HUMAN Isoform of O75964, ATP synthase subunit g, mitochondrial OS=Homo sapiens (Human) OX=9606 GN=ATP5MG PE=1 SV=1;>sp|O75964|ATP5L_HUMAN ATP synthase subunit g, mitochondrial OS=Homo sapiens (Human) OX=9606 GN=ATP5MG PE=1 SV=3	ATP5MG	0.637636	0.157409	No	0.161407	No	-1.19879
P28066	>sp|P28066|PSA5_HUMAN Proteasome subunit alpha type-5 OS=Homo sapiens (Human) OX=9606 GN=PSMA5 PE=1 SV=3	PSMA5	1.2622	0.158079	No	0.161817	No	1.19682
Q92963;Q92963-3;V9GY29;V9GYC3	>sp|Q92963|RIT1_HUMAN GTP-binding protein Rit1 OS=Homo sapiens (Human) OX=9606 GN=RIT1 PE=1 SV=1;>sp|Q92963-3|RIT1-3_HUMAN Isoform of Q92963, Isoform 3 of GTP-binding protein Rit1 OS=Homo sapiens (Human) OX=9606 GN=RIT1 PE=1 SV=1;>tr|V9GY29|V9GY29_HUMAN Isoform of Q92963, GTP-binding protein Rit1 OS=Homo sapiens (Human) OX=9606 GN=RIT1 PE=1 SV=1;>tr|V9GYC3|V9GYC3_HUMAN Isoform of Q92963, GTP-bind…	RIT1	0.767681	0.158082	No	0.161817	No	-1.19681
Q14195-2	>sp|Q14195-2|DPYL3-2_HUMAN Isoform of Q14195, Isoform LCRMP-4 of Dihydropyrimidinase-related protein 3 OS=Homo sapiens (Human) OX=9606 GN=DPYSL3 PE=1 SV=1	DPYSL3	1.26634	0.158504	No	0.16211	No	1.19546
Q9H6U6;Q9H6U6-2;Q9H6U6-3;Q9H6U6-7;Q9H6U6-8	>sp|Q9H6U6|BCAS3_HUMAN Breast carcinoma-amplified sequence 3 OS=Homo sapiens (Human) OX=9606 GN=BCAS3 PE=1 SV=3;>sp|Q9H6U6-2|BCAS3-2_HUMAN Isoform of Q9H6U6, Isoform 1 of Breast carcinoma-amplified sequence 3 OS=Homo sapiens (Human) OX=9606 GN=BCAS3 PE=1 SV=3;>sp|Q9H6U6-3|BCAS3-3_HUMAN Isoform of Q9H6U6, Isoform 3 of Breast carcinoma-amplified sequence 3 OS=Homo sapiens (Human) OX=9606 GN=BCAS3 P…	BCAS3	0.791444	0.158663	No	0.162132	No	-1.19499
P50135	>sp|P50135|HNMT_HUMAN Histamine N-methyltransferase OS=Homo sapiens (Human) OX=9606 GN=HNMT PE=1 SV=1	HNMT	0.419641	0.15958	No	0.162656	No	-1.19224
Q96CV9;Q96CV9-2;Q96CV9-3	>sp|Q96CV9|OPTN_HUMAN Optineurin OS=Homo sapiens (Human) OX=9606 GN=OPTN PE=1 SV=3;>sp|Q96CV9-2|OPTN-2_HUMAN Isoform of Q96CV9, Isoform 2 of Optineurin OS=Homo sapiens (Human) OX=9606 GN=OPTN PE=1 SV=3;>sp|Q96CV9-3|OPTN-3_HUMAN Isoform of Q96CV9, Isoform 3 of Optineurin OS=Homo sapiens (Human) OX=9606 GN=OPTN PE=1 SV=3	OPTN	0.729629	0.159586	No	0.162656	No	-1.19222
Q6PCE3	>sp|Q6PCE3|PGM2L_HUMAN Glucose 1,6-bisphosphate synthase OS=Homo sapiens (Human) OX=9606 GN=PGM2L1 PE=1 SV=3	PGM2L1	0.860963	0.15938	No	0.162656	No	-1.19287
A0A087WZW8	>tr|A0A087WZW8|A0A087WZW8_HUMAN Protein IGKV3-11 OS=Homo sapiens GN=IGKV3-11 PE=4 SV=1	IGKV3-11	1.57013	0.161277	No	0.164239	No	1.18718
E5RI99;P62888	>tr|E5RI99|E5RI99_HUMAN Isoform of P62888, Ribosomal_L7Ae domain-containing protein (Fragment) OS=Homo sapiens (Human) OX=9606 GN=RPL30 PE=1 SV=1;>sp|P62888|RL30_HUMAN 60S ribosomal protein L30 OS=Homo sapiens (Human) OX=9606 GN=RPL30 PE=1 SV=2	RPL30	1.3219	0.162027	No	0.164786	No	1.18502
Q14166	>sp|Q14166|TTL12_HUMAN Tubulin--tyrosine ligase-like protein 12 OS=Homo sapiens (Human) OX=9606 GN=TTLL12 PE=1 SV=2	TTLL12	1.29429	0.162093	No	0.164786	No	1.18487
F5GYQ1;P61421	>tr|F5GYQ1|F5GYQ1_HUMAN Isoform of P61421, V-type proton ATPase subunit OS=Homo sapiens (Human) OX=9606 GN=ATP6V0D1 PE=1 SV=1;>sp|P61421|VA0D1_HUMAN V-type proton ATPase subunit d 1 OS=Homo sapiens (Human) OX=9606 GN=ATP6V0D1 PE=1 SV=1	ATP6V0D1	0.873606	0.162514	No	0.164932	No	-1.18363
Q5HYK3	>sp|Q5HYK3|COQ5_HUMAN 2-methoxy-6-polyprenyl-1,4-benzoquinol methylase, mitochondrial OS=Homo sapiens (Human) OX=9606 GN=COQ5 PE=1 SV=2	COQ5	0.846002	0.16246	No	0.164932	No	-1.18381
Q8NFX7;Q8NFX7-2	>sp|Q8NFX7|STXB6_HUMAN Syntaxin-binding protein 6 OS=Homo sapiens (Human) OX=9606 GN=STXBP6 PE=1 SV=2;>sp|Q8NFX7-2|STXB6-2_HUMAN Isoform of Q8NFX7, Isoform 2 of Syntaxin-binding protein 6 OS=Homo sapiens (Human) OX=9606 GN=STXBP6 PE=1 SV=2	STXBP6	1.28367	0.162812	No	0.165094	No	1.1828
P12955;P12955-3	>sp|P12955|PEPD_HUMAN Xaa-Pro dipeptidase OS=Homo sapiens (Human) OX=9606 GN=PEPD PE=1 SV=3;>sp|P12955-3|PEPD-3_HUMAN Isoform of P12955, Isoform 3 of Xaa-Pro dipeptidase OS=Homo sapiens (Human) OX=9606 GN=PEPD PE=1 SV=3	PEPD	1.51154	0.163198	No	0.165239	No	1.18167
P51149	>sp|P51149|RAB7A_HUMAN Ras-related protein Rab-7a OS=Homo sapiens (Human) OX=9606 GN=RAB7A PE=1 SV=1	RAB7A	1.14253	0.163234	No	0.165239	No	1.18154
Q8WXI2;Q8WXI2-2;Q8WXI2-4;Q8WXI2-5	>sp|Q8WXI2|CNKR2_HUMAN Connector enhancer of kinase suppressor of ras 2 OS=Homo sapiens (Human) OX=9606 GN=CNKSR2 PE=1 SV=1;>sp|Q8WXI2-2|CNKR2-2_HUMAN Isoform of Q8WXI2, Isoform 2 of Connector enhancer of kinase suppressor of ras 2 OS=Homo sapiens (Human) OX=9606 GN=CNKSR2 PE=1 SV=1;>sp|Q8WXI2-4|CNKR2-4_HUMAN Isoform of Q8WXI2, Isoform 3 of Connector enhancer of kinase suppressor of ras 2 OS=Homo…	CNKSR2	0.753243	0.163694	No	0.165564	No	-1.18022
J3KR97;Q9BTW9;Q9BTW9-4	>tr|J3KR97|J3KR97_HUMAN Isoform of Q9BTW9, TFCD_C domain-containing protein OS=Homo sapiens (Human) OX=9606 GN=TBCD PE=1 SV=1;>sp|Q9BTW9|TBCD_HUMAN Tubulin-specific chaperone D OS=Homo sapiens (Human) OX=9606 GN=TBCD PE=1 SV=2;>sp|Q9BTW9-4|TBCD-4_HUMAN Isoform of Q9BTW9, Isoform 4 of Tubulin-specific chaperone D OS=Homo sapiens (Human) OX=9606 GN=TBCD PE=1 SV=2	TBCD	0.869055	0.164057	No	0.16579	No	-1.17916
P25098	>sp|P25098|ARBK1_HUMAN Beta-adrenergic receptor kinase 1 OS=Homo sapiens (Human) OX=9606 GN=GRK2 PE=1 SV=2	GRK2	0.810234	0.164484	No	0.165857	No	-1.1779
Q8TAT6;Q8TAT6-2	>sp|Q8TAT6|NPL4_HUMAN Nuclear protein localization protein 4 homolog OS=Homo sapiens (Human) OX=9606 GN=NPLOC4 PE=1 SV=3;>sp|Q8TAT6-2|NPL4-2_HUMAN Isoform of Q8TAT6, Isoform 2 of Nuclear protein localization protein 4 homolog OS=Homo sapiens (Human) OX=9606 GN=NPLOC4 PE=1 SV=3	NPLOC4	0.76775	0.164274	No	0.165857	No	-1.17854
P21980	>sp|P21980|TGM2_HUMAN Protein-glutamine gamma-glutamyltransferase 2 OS=Homo sapiens (Human) OX=9606 GN=TGM2 PE=1 SV=2	TGM2	1.31968	0.164543	No	0.165857	No	1.17773
Q9NQW6	>sp|Q9NQW6|ANLN_HUMAN Anillin OS=Homo sapiens (Human) OX=9606 GN=ANLN PE=1 SV=2	ANLN	0.606188	0.164918	No	0.166095	No	-1.17663
F5GXW5;Q99622;U3KQ07	>tr|F5GXW5|F5GXW5_HUMAN Isoform of Q99622, Protein C10 OS=Homo sapiens (Human) OX=9606 GN=C12orf57 PE=1 SV=1;>sp|Q99622|C10_HUMAN Protein C10 OS=Homo sapiens (Human) OX=9606 GN=C12orf57 PE=1 SV=1;>tr|U3KQ07|U3KQ07_HUMAN Isoform of Q99622, Protein C10 OS=Homo sapiens (Human) OX=9606 GN=C12orf57 PE=1 SV=1	C12ORF57	0.660443	0.165345	No	0.166383	No	-1.17548
H0Y750;O75787;O75787-2	>tr|H0Y750|H0Y750_HUMAN Renin receptor (Fragment) OS=Homo sapiens GN=ATP6AP2 PE=4 SV=1;>sp|O75787|RENR_HUMAN Renin receptor OS=Homo sapiens (Human) OX=9606 GN=ATP6AP2 PE=1 SV=2;>sp|O75787-2|RENR-2_HUMAN Isoform of O75787, Isoform 2 of Renin receptor OS=Homo sapiens (Human) OX=9606 GN=ATP6AP2 PE=1 SV=2	ATP6AP2	0.42916	0.166057	No	0.166817	No	-1.17338
K7EKG4;O96008;O96008-2	>tr|K7EKG4|K7EKG4_HUMAN Isoform of O96008, Mitochondrial import receptor subunit TOM40 homolog (Fragment) OS=Homo sapiens (Human) OX=9606 GN=TOMM40 PE=1 SV=1;>sp|O96008|TOM40_HUMAN Mitochondrial import receptor subunit TOM40 homolog OS=Homo sapiens (Human) OX=9606 GN=TOMM40 PE=1 SV=1;>sp|O96008-2|TOM40-2_HUMAN Isoform of O96008, Isoform 2 of Mitochondrial import receptor subunit TOM40 homolog OS=…	TOMM40	1.19065	0.166057	No	0.166817	No	1.17339
P32969	>sp|P32969|RL9_HUMAN 60S ribosomal protein L9 OS=Homo sapiens (Human) OX=9606 GN=RPL9P8 PE=1 SV=1	RPL9P8	1.1513	0.166575	No	0.167195	No	1.17194
Q7Z2K8	>sp|Q7Z2K8|GRIN1_HUMAN G protein-regulated inducer of neurite outgrowth 1 OS=Homo sapiens (Human) OX=9606 GN=GPRIN1 PE=1 SV=2	GPRIN1	0.713039	0.166798	No	0.167234	No	-1.17129
E5RIM3;H0YAU9;Q9Y263	>tr|E5RIM3|E5RIM3_HUMAN Isoform of Q9Y263, Phospholipase A-2-activating protein OS=Homo sapiens (Human) OX=9606 GN=PLAA PE=1 SV=1;>tr|H0YAU9|H0YAU9_HUMAN Isoform of Q9Y263, WD_REPEATS_REGION domain-containing protein (Fragment) OS=Homo sapiens (Human) OX=9606 GN=PLAA PE=1 SV=1;>sp|Q9Y263|PLAP_HUMAN Phospholipase A-2-activating protein OS=Homo sapiens (Human) OX=9606 GN=PLAA PE=1 SV=2	PLAA	0.750136	0.167002	No	0.167234	No	-1.17067
E9PNK6;E9PPQ1;J3KNE7;Q16890;Q16890-2;Q16890-3;Q168	NA	TPD52L1	0.742919	0.167036	No	0.167234	No	-1.17058
Q07065	>sp|Q07065|CKAP4_HUMAN Cytoskeleton-associated protein 4 OS=Homo sapiens (Human) OX=9606 GN=CKAP4 PE=1 SV=2	CKAP4	0.715739	0.167607	No	0.167397	No	-1.16894
P49006	>sp|P49006|MRP_HUMAN MARCKS-related protein OS=Homo sapiens (Human) OX=9606 GN=MARCKSL1 PE=1 SV=2	MARCKSL1	2.07625	0.167461	No	0.167397	No	1.16933
O00194	>sp|O00194|RB27B_HUMAN Ras-related protein Rab-27B OS=Homo sapiens (Human) OX=9606 GN=RAB27B PE=1 SV=4	RAB27B	1.18968	0.167622	No	0.167397	No	1.16889
P49589-3	>sp|P49589-3|SYCC-3_HUMAN Isoform of P49589, Isoform 3 of Cysteine--tRNA ligase, cytoplasmic OS=Homo sapiens (Human) OX=9606 GN=CARS PE=1 SV=3	CARS	0.837028	0.168071	No	0.167705	No	-1.16767
Q4G176	>sp|Q4G176|ACSF3_HUMAN Malonate--CoA ligase ACSF3, mitochondrial OS=Homo sapiens (Human) OX=9606 GN=ACSF3 PE=1 SV=3	ACSF3	0.508861	0.168778	No	0.168128	No	-1.16567
H3BPZ1;H3BS72;Q9P035	>tr|H3BPZ1|H3BPZ1_HUMAN Isoform of Q9P035, Very-long-chain (3R)-3-hydroxyacyl-CoA dehydratase OS=Homo sapiens (Human) OX=9606 GN=HACD3 PE=1 SV=1;>tr|H3BS72|H3BS72_HUMAN Isoform of Q9P035, Very-long-chain (3R)-3-hydroxyacyl-CoA dehydratase OS=Homo sapiens (Human) OX=9606 GN=HACD3 PE=1 SV=1;>sp|Q9P035|HACD3_HUMAN Very-long-chain (3R)-3-hydroxyacyl-CoA dehydratase 3 OS=Homo sapiens (Human) OX=9606 G…	HACD3	1.21936	0.168669	No	0.168128	No	1.16599
A6NDG6	>sp|A6NDG6|PGP_HUMAN Glycerol-3-phosphate phosphatase OS=Homo sapiens (Human) OX=9606 GN=PGP PE=1 SV=1	PGP	0.713758	0.169777	No	0.16896	No	-1.16283
A0A087X256;Q2M389	>tr|A0A087X256|A0A087X256_HUMAN Isoform of Q2M389, WASH complex subunit 4 OS=Homo sapiens (Human) OX=9606 GN=WASHC4 PE=1 SV=1;>sp|Q2M389|WASC4_HUMAN WASH complex subunit 4 OS=Homo sapiens (Human) OX=9606 GN=WASHC4 PE=1 SV=2	WASHC4	1.28045	0.169898	No	0.16896	No	1.16246
E9PR44;P02511	>tr|E9PR44|E9PR44_HUMAN Alpha-crystallin B chain (Fragment) OS=Homo sapiens GN=CRYAB PE=3 SV=1;>sp|P02511|CRYAB_HUMAN Alpha-crystallin B chain OS=Homo sapiens (Human) OX=9606 GN=CRYAB PE=1 SV=2	CRYAB	1.25048	0.170294	No	0.169212	No	1.1614
Q96GG9	>sp|Q96GG9|DCNL1_HUMAN DCN1-like protein 1 OS=Homo sapiens (Human) OX=9606 GN=DCUN1D1 PE=1 SV=1	DCUN1D1	0.834485	0.170994	No	0.16961	No	-1.15941
K7ER15;Q9H0R4	>tr|K7ER15|K7ER15_HUMAN Isoform of Q9H0R4, Haloacid dehalogenase-like hydrolase domain-containing protein 2 (Fragment) OS=Homo sapiens (Human) OX=9606 GN=HDHD2 PE=1 SV=1;>sp|Q9H0R4|HDHD2_HUMAN Haloacid dehalogenase-like hydrolase domain-containing protein 2 OS=Homo sapiens (Human) OX=9606 GN=HDHD2 PE=1 SV=1	HDHD2	1.34532	0.171137	No	0.16961	No	1.15901
P11277;P11277-2;P11277-3	>sp|P11277|SPTB1_HUMAN Spectrin beta chain, erythrocytic OS=Homo sapiens (Human) OX=9606 GN=SPTB PE=1 SV=5;>sp|P11277-2|SPTB1-2_HUMAN Isoform of P11277, Isoform 2 of Spectrin beta chain, erythrocytic OS=Homo sapiens (Human) OX=9606 GN=SPTB PE=1 SV=5;>sp|P11277-3|SPTB1-3_HUMAN Isoform of P11277, Isoform 3 of Spectrin beta chain, erythrocytic OS=Homo sapiens (Human) OX=9606 GN=SPTB PE=1 SV=5	SPTB	0.863321	0.170885	No	0.16961	No	-1.1597
E5RGX5;Q93045;Q93045-2	>tr|E5RGX5|E5RGX5_HUMAN Isoform of Q93045, Stathmin OS=Homo sapiens (Human) OX=9606 GN=STMN2 PE=1 SV=1;>sp|Q93045|STMN2_HUMAN Stathmin-2 OS=Homo sapiens (Human) OX=9606 GN=STMN2 PE=1 SV=3;>sp|Q93045-2|STMN2-2_HUMAN Isoform of Q93045, Isoform 2 of Stathmin-2 OS=Homo sapiens (Human) OX=9606 GN=STMN2 PE=1 SV=3	STMN2	0.770139	0.171265	No	0.16961	No	-1.15867
Q96G03	>sp|Q96G03|PGM2_HUMAN Phosphoglucomutase-2 OS=Homo sapiens (Human) OX=9606 GN=PGM2 PE=1 SV=4	PGM2	1.31434	0.171442	No	0.169643	No	1.15813
C9JC84;C9JEU5;P02679;P02679-2	>tr|C9JC84|C9JC84_HUMAN Isoform of P02679, Fibrinogen C-terminal domain-containing protein OS=Homo sapiens (Human) OX=9606 GN=FGG PE=1 SV=1;>tr|C9JEU5|C9JEU5_HUMAN Isoform of P02679, Fibrinogen C-terminal domain-containing protein OS=Homo sapiens (Human) OX=9606 GN=FGG PE=1 SV=1;>sp|P02679|FIBG_HUMAN Fibrinogen gamma chain OS=Homo sapiens (Human) OX=9606 GN=FGG PE=1 SV=3;>sp|P02679-2|FIBG-2_HUMAN…	FGG	1.46668	0.172555	No	0.17046	No	1.15505
Q99685	>sp|Q99685|MGLL_HUMAN Monoglyceride lipase OS=Homo sapiens (Human) OX=9606 GN=MGLL PE=1 SV=2	MGLL	0.865196	0.172539	No	0.17046	No	-1.1551
H3BSW0;Q8N9N7	>tr|H3BSW0|H3BSW0_HUMAN Isoform of Q8N9N7, Leucine-rich repeat-containing protein 57 (Fragment) OS=Homo sapiens (Human) OX=9606 GN=LRRC57 PE=1 SV=1;>sp|Q8N9N7|LRC57_HUMAN Leucine-rich repeat-containing protein 57 OS=Homo sapiens (Human) OX=9606 GN=LRRC57 PE=1 SV=1	LRRC57	0.868359	0.172875	No	0.170634	No	-1.15418
E5RIB1	>tr|E5RIB1|E5RIB1_HUMAN Isoform of P35221, Catenin alpha-1 (Fragment) OS=Homo sapiens (Human) OX=9606 GN=CTNNA1 PE=1 SV=1	CTNNA1	1.17978	0.173612	No	0.17122	No	1.15215
B3KQ30;B4DNC9;F5H5N2;Q9H1K1;Q9H1K1-2	>tr|B3KQ30|B3KQ30_HUMAN Isoform of Q9H1K1, NifU_N domain-containing protein OS=Homo sapiens (Human) OX=9606 GN=ISCU PE=1 SV=1;>tr|B4DNC9|B4DNC9_HUMAN Isoform of Q9H1K1, NifU_N domain-containing protein OS=Homo sapiens (Human) OX=9606 GN=ISCU PE=1 SV=1;>tr|F5H5N2|F5H5N2_HUMAN Isoform of Q9H1K1, NifU_N domain-containing protein OS=Homo sapiens (Human) OX=9606 GN=ISCU PE=1 SV=1;>sp|Q9H1K1|ISCU_HUMAN…	ISCU	0.810403	0.17382	No	0.171282	No	-1.15155
Q5T440	>sp|Q5T440|CAF17_HUMAN Putative transferase CAF17, mitochondrial OS=Homo sapiens (Human) OX=9606 GN=IBA57 PE=1 SV=1	IBA57	0.450346	0.174001	No	0.171302	No	-1.15104
G3V4M9;Q13572	>tr|G3V4M9|G3V4M9_HUMAN Isoform of Q13572, Ins134_P3_kin domain-containing protein OS=Homo sapiens (Human) OX=9606 GN=ITPK1 PE=1 SV=1;>sp|Q13572|ITPK1_HUMAN Inositol-tetrakisphosphate 1-kinase OS=Homo sapiens (Human) OX=9606 GN=ITPK1 PE=1 SV=2	ITPK1	0.723984	0.174155	No	0.171302	No	-1.1506
P19623	>sp|P19623|SPEE_HUMAN Spermidine synthase OS=Homo sapiens (Human) OX=9606 GN=SRM PE=1 SV=1	SRM	1.39584	0.174272	No	0.171302	No	1.15024
P23526	>sp|P23526|SAHH_HUMAN Adenosylhomocysteinase OS=Homo sapiens (Human) OX=9606 GN=AHCY PE=1 SV=4	AHCY	1.32117	0.174578	No	0.17146	No	1.14941
Q96SZ5	>sp|Q96SZ5|AEDO_HUMAN 2-aminoethanethiol dioxygenase OS=Homo sapiens (Human) OX=9606 GN=ADO PE=1 SV=2	ADO	0.739852	0.175555	No	0.172049	No	-1.14666
P25685	>sp|P25685|DNJB1_HUMAN DnaJ homolog subfamily B member 1 OS=Homo sapiens (Human) OX=9606 GN=DNAJB1 PE=1 SV=4	DNAJB1	0.826763	0.175612	No	0.172049	No	-1.14652
P49841;P49841-2	>sp|P49841|GSK3B_HUMAN Glycogen synthase kinase-3 beta OS=Homo sapiens (Human) OX=9606 GN=GSK3B PE=1 SV=2;>sp|P49841-2|GSK3B-2_HUMAN Isoform of P49841, Isoform 2 of Glycogen synthase kinase-3 beta OS=Homo sapiens (Human) OX=9606 GN=GSK3B PE=1 SV=2	GSK3B	0.792356	0.175404	No	0.172049	No	-1.14709
P56192	>sp|P56192|SYMC_HUMAN Methionine--tRNA ligase, cytoplasmic OS=Homo sapiens (Human) OX=9606 GN=MARS PE=1 SV=2	MARS	0.873532	0.175965	No	0.172253	No	-1.14553
P40121;P40121-2	>sp|P40121|CAPG_HUMAN Macrophage-capping protein OS=Homo sapiens (Human) OX=9606 GN=CAPG PE=1 SV=2;>sp|P40121-2|CAPG-2_HUMAN Isoform of P40121, Isoform 2 of Macrophage-capping protein OS=Homo sapiens (Human) OX=9606 GN=CAPG PE=1 SV=2	CAPG	1.56442	0.178183	No	0.173455	No	1.13944
P63096	>sp|P63096|GNAI1_HUMAN Guanine nucleotide-binding protein G(i) subunit alpha-1 OS=Homo sapiens (Human) OX=9606 GN=GNAI1 PE=1 SV=2	GNAI1	0.880098	0.177982	No	0.173455	No	-1.14004
O00629	>sp|O00629|IMA3_HUMAN Importin subunit alpha-3 OS=Homo sapiens (Human) OX=9606 GN=KPNA4 PE=1 SV=1	KPNA4	0.695976	0.177822	No	0.173455	No	-1.14045
P32004	>sp|P32004|L1CAM_HUMAN Neural cell adhesion molecule L1 OS=Homo sapiens (Human) OX=9606 GN=L1CAM PE=1 SV=2	L1CAM	1.15648	0.178165	No	0.173455	No	1.13948
F8W8H5;Q969Q5	>tr|F8W8H5|F8W8H5_HUMAN Isoform of Q969Q5, Ras-related protein Rab-24 OS=Homo sapiens (Human) OX=9606 GN=RAB24 PE=1 SV=1;>sp|Q969Q5|RAB24_HUMAN Ras-related protein Rab-24 OS=Homo sapiens (Human) OX=9606 GN=RAB24 PE=1 SV=1	RAB24	0.866726	0.177534	No	0.173455	No	-1.14119
P39023	>sp|P39023|RL3_HUMAN 60S ribosomal protein L3 OS=Homo sapiens (Human) OX=9606 GN=RPL3 PE=1 SV=2	RPL3	2.41284	0.178198	No	0.173455	No	1.13938
Q12846;Q12846-2	>sp|Q12846|STX4_HUMAN Syntaxin-4 OS=Homo sapiens (Human) OX=9606 GN=STX4 PE=1 SV=2;>sp|Q12846-2|STX4-2_HUMAN Isoform of Q12846, Isoform 2 of Syntaxin-4 OS=Homo sapiens (Human) OX=9606 GN=STX4 PE=1 SV=2	STX4	1.18588	0.178216	No	0.173455	No	1.13934
P16157;P16157-10;P16157-11;P16157-12;P16157-13;P16	NA	ANK1	1.19476	0.178937	No	0.174015	No	1.13737
O14617;O14617-4;O14617-5	>sp|O14617|AP3D1_HUMAN AP-3 complex subunit delta-1 OS=Homo sapiens (Human) OX=9606 GN=AP3D1 PE=1 SV=1;>sp|O14617-4|AP3D1-4_HUMAN Isoform of O14617, Isoform 4 of AP-3 complex subunit delta-1 OS=Homo sapiens (Human) OX=9606 GN=AP3D1 PE=1 SV=1;>sp|O14617-5|AP3D1-5_HUMAN Isoform of O14617, Isoform 5 of AP-3 complex subunit delta-1 OS=Homo sapiens (Human) OX=9606 GN=AP3D1 PE=1 SV=1	AP3D1	0.864732	0.179204	No	0.174131	No	-1.13668
Q13875;Q13875-2;Q13875-4	>sp|Q13875|MOBP_HUMAN Myelin-associated oligodendrocyte basic protein OS=Homo sapiens (Human) OX=9606 GN=MOBP PE=1 SV=2;>sp|Q13875-2|MOBP-2_HUMAN Isoform of Q13875, Isoform 2 of Myelin-associated oligodendrocyte basic protein OS=Homo sapiens (Human) OX=9606 GN=MOBP PE=2 SV=2;>sp|Q13875-4|MOBP-4_HUMAN Isoform of Q13875, Isoform 4 of Myelin-associated oligodendrocyte basic protein OS=Homo sapiens (…	MOBP	0.62749	0.179675	No	0.174162	No	-1.13542
Q9UNZ2;Q9UNZ2-5	>sp|Q9UNZ2|NSF1C_HUMAN NSFL1 cofactor p47 OS=Homo sapiens (Human) OX=9606 GN=NSFL1C PE=1 SV=2;>sp|Q9UNZ2-5|NSF1C-5_HUMAN Isoform of Q9UNZ2, Isoform 3 of NSFL1 cofactor p47 OS=Homo sapiens (Human) OX=9606 GN=NSFL1C PE=1 SV=2	NSFL1C	1.26528	0.1795	No	0.174162	No	1.1359
Q15366;Q15366-2;Q15366-3;Q15366-6	>sp|Q15366|PCBP2_HUMAN Poly(rC)-binding protein 2 OS=Homo sapiens (Human) OX=9606 GN=PCBP2 PE=1 SV=1;>sp|Q15366-2|PCBP2-2_HUMAN Isoform of Q15366, Isoform 2 of Poly(rC)-binding protein 2 OS=Homo sapiens (Human) OX=9606 GN=PCBP2 PE=1 SV=1;>sp|Q15366-3|PCBP2-3_HUMAN Isoform of Q15366, Isoform 3 of Poly(rC)-binding protein 2 OS=Homo sapiens (Human) OX=9606 GN=PCBP2 PE=1 SV=1;>sp|Q15366-6|PCBP2-6_HUM…	PCBP2	1.16109	0.179572	No	0.174162	No	1.13573
Q96BM9	>sp|Q96BM9|ARL8A_HUMAN ADP-ribosylation factor-like protein 8A OS=Homo sapiens (Human) OX=9606 GN=ARL8A PE=1 SV=1	ARL8A	1.28889	0.182437	No	0.176694	No	1.12811
Q86VW0	>sp|Q86VW0|SESD1_HUMAN SEC14 domain and spectrin repeat-containing protein 1 OS=Homo sapiens (Human) OX=9606 GN=SESTD1 PE=1 SV=2	SESTD1	0.824329	0.182796	No	0.176898	No	-1.12712
Q00688	>sp|Q00688|FKBP3_HUMAN Peptidyl-prolyl cis-trans isomerase FKBP3 OS=Homo sapiens (Human) OX=9606 GN=FKBP3 PE=1 SV=1	FKBP3	1.37765	0.184066	No	0.177982	No	1.12372
Q96HE7	>sp|Q96HE7|ERO1A_HUMAN ERO1-like protein alpha OS=Homo sapiens (Human) OX=9606 GN=ERO1A PE=1 SV=2	ERO1A	0.720443	0.184259	No	0.178024	No	-1.12322
P61163	>sp|P61163|ACTZ_HUMAN Alpha-centractin OS=Homo sapiens (Human) OX=9606 GN=ACTR1A PE=1 SV=1	ACTR1A	0.847419	0.184704	No	0.178109	No	-1.12205
Q99832	>sp|Q99832|TCPH_HUMAN T-complex protein 1 subunit eta OS=Homo sapiens (Human) OX=9606 GN=CCT7 PE=1 SV=2	CCT7	0.870076	0.184622	No	0.178109	No	-1.12225
E7EQ61;E7EWE1;Q9GZZ9	>tr|E7EQ61|E7EQ61_HUMAN Isoform of Q9GZZ9, ThiF domain-containing protein OS=Homo sapiens (Human) OX=9606 GN=UBA5 PE=1 SV=1;>tr|E7EWE1|E7EWE1_HUMAN Isoform of Q9GZZ9, ThiF domain-containing protein OS=Homo sapiens (Human) OX=9606 GN=UBA5 PE=1 SV=1;>sp|Q9GZZ9|UBA5_HUMAN Ubiquitin-like modifier-activating enzyme 5 OS=Homo sapiens (Human) OX=9606 GN=UBA5 PE=1 SV=1	UBA5	0.858397	0.184798	No	0.178109	No	-1.12182
Q9NX14;Q9NX14-2	>sp|Q9NX14|NDUBB_HUMAN NADH dehydrogenase [ubiquinone] 1 beta subcomplex subunit 11, mitochondrial OS=Homo sapiens (Human) OX=9606 GN=NDUFB11 PE=1 SV=1;>sp|Q9NX14-2|NDUBB-2_HUMAN Isoform of Q9NX14, Isoform 2 of NADH dehydrogenase [ubiquinone] 1 beta subcomplex subunit 11, mitochondrial OS=Homo sapiens (Human) OX=9606 GN=NDUFB11 PE=1 SV=1	NDUFB11	1.79702	0.186561	No	0.179663	No	1.11717
P49368	>sp|P49368|TCPG_HUMAN T-complex protein 1 subunit gamma OS=Homo sapiens (Human) OX=9606 GN=CCT3 PE=1 SV=4	CCT3	0.89519	0.187613	No	0.180529	No	-1.11446
Q96AG4	>sp|Q96AG4|LRC59_HUMAN Leucine-rich repeat-containing protein 59 OS=Homo sapiens (Human) OX=9606 GN=LRRC59 PE=1 SV=1	LRRC59	0.805024	0.187964	No	0.180658	No	-1.11354
Q15393	>sp|Q15393|SF3B3_HUMAN Splicing factor 3B subunit 3 OS=Homo sapiens (Human) OX=9606 GN=SF3B3 PE=1 SV=4	SF3B3	1.20677	0.18805	No	0.180658	No	1.11331
Q9Y2T3	>sp|Q9Y2T3|GUAD_HUMAN Guanine deaminase OS=Homo sapiens (Human) OX=9606 GN=GDA PE=1 SV=1	GDA	0.780072	0.18941	No	0.181705	No	-1.10974
Q9BTM9;Q9BTM9-2;Q9BTM9-3	>sp|Q9BTM9|URM1_HUMAN Ubiquitin-related modifier 1 OS=Homo sapiens (Human) OX=9606 GN=URM1 PE=1 SV=1;>sp|Q9BTM9-2|URM1-2_HUMAN Isoform of Q9BTM9, Isoform 2 of Ubiquitin-related modifier 1 OS=Homo sapiens (Human) OX=9606 GN=URM1 PE=1 SV=1;>sp|Q9BTM9-3|URM1-3_HUMAN Isoform of Q9BTM9, Isoform 3 of Ubiquitin-related modifier 1 OS=Homo sapiens (Human) OX=9606 GN=URM1 PE=1 SV=1	URM1	0.765803	0.189447	No	0.181705	No	-1.10962
P04350	>sp|P04350|TBB4A_HUMAN Tubulin beta-4A chain OS=Homo sapiens (Human) OX=9606 GN=TUBB4A PE=1 SV=2	TUBB4A	0.879493	0.19041	No	0.182481	No	-1.10711
P62879	>sp|P62879|GBB2_HUMAN Guanine nucleotide-binding protein G(I)/G(S)/G(T) subunit beta-2 OS=Homo sapiens (Human) OX=9606 GN=GNB2 PE=1 SV=3	GNB2	1.29446	0.191096	No	0.182844	No	1.10533
P36507	>sp|P36507|MP2K2_HUMAN Dual specificity mitogen-activated protein kinase kinase 2 OS=Homo sapiens (Human) OX=9606 GN=MAP2K2 PE=1 SV=1	MAP2K2	0.853462	0.191081	No	0.182844	No	-1.10537
Q05193	>sp|Q05193|DYN1_HUMAN Dynamin-1 OS=Homo sapiens (Human) OX=9606 GN=DNM1 PE=1 SV=2	DNM1	0.89569	0.191346	No	0.182936	No	-1.10469
H0YDP7;Q13405	>tr|H0YDP7|H0YDP7_HUMAN Isoform of Q13405, 39S ribosomal protein L49, mitochondrial (Fragment) OS=Homo sapiens (Human) OX=9606 GN=MRPL49 PE=1 SV=1;>sp|Q13405|RM49_HUMAN 39S ribosomal protein L49, mitochondrial OS=Homo sapiens (Human) OX=9606 GN=MRPL49 PE=1 SV=1	MRPL49	0.673687	0.192632	No	0.184017	No	-1.10151
A0A087WXB0;O15126	>tr|A0A087WXB0|A0A087WXB0_HUMAN Isoform of O15126, Secretory carrier-associated membrane protein OS=Homo sapiens (Human) OX=9606 GN=SCAMP1 PE=1 SV=1;>sp|O15126|SCAM1_HUMAN Secretory carrier-associated membrane protein 1 OS=Homo sapiens (Human) OX=9606 GN=SCAMP1 PE=1 SV=2	SCAMP1	0.795672	0.1931	No	0.184316	No	-1.10027
F8VNT9;F8VV56;F8VWK8;F8W022;P08962;P08962-2;P08962	NA	CD63	1.17556	0.194301	No	0.185074	No	1.09722
Q9NTX5;Q9NTX5-2;Q9NTX5-3;Q9NTX5-6	>sp|Q9NTX5|ECHD1_HUMAN Ethylmalonyl-CoA decarboxylase OS=Homo sapiens (Human) OX=9606 GN=ECHDC1 PE=1 SV=2;>sp|Q9NTX5-2|ECHD1-2_HUMAN Isoform of Q9NTX5, Isoform 2 of Ethylmalonyl-CoA decarboxylase OS=Homo sapiens (Human) OX=9606 GN=ECHDC1 PE=1 SV=2;>sp|Q9NTX5-3|ECHD1-3_HUMAN Isoform of Q9NTX5, Isoform 3 of Ethylmalonyl-CoA decarboxylase OS=Homo sapiens (Human) OX=9606 GN=ECHDC1 PE=1 SV=2;>sp|Q9NTX…	ECHDC1	1.267	0.194362	No	0.185074	No	1.09707
E5RJL1;Q99884	>tr|E5RJL1|E5RJL1_HUMAN Isoform of Q99884, Transporter OS=Homo sapiens (Human) OX=9606 GN=SLC6A7 PE=1 SV=1;>sp|Q99884|SC6A7_HUMAN Sodium-dependent proline transporter OS=Homo sapiens (Human) OX=9606 GN=SLC6A7 PE=2 SV=2	SLC6A7	1.26513	0.194201	No	0.185074	No	1.09746
Q9UJS0;Q9UJS0-2	>sp|Q9UJS0|CMC2_HUMAN Calcium-binding mitochondrial carrier protein Aralar2 OS=Homo sapiens (Human) OX=9606 GN=SLC25A13 PE=1 SV=2;>sp|Q9UJS0-2|CMC2-2_HUMAN Isoform of Q9UJS0, Isoform 2 of Calcium-binding mitochondrial carrier protein Aralar2 OS=Homo sapiens (Human) OX=9606 GN=SLC25A13 PE=1 SV=2	SLC25A13	0.814618	0.194616	No	0.185167	No	-1.09642
G3V4P8;P60983	>tr|G3V4P8|G3V4P8_HUMAN Isoform of P60983, ADF-H domain-containing protein (Fragment) OS=Homo sapiens (Human) OX=9606 GN=GMFB PE=1 SV=1;>sp|P60983|GMFB_HUMAN Glia maturation factor beta OS=Homo sapiens (Human) OX=9606 GN=GMFB PE=1 SV=2	GMFB	1.25707	0.194953	No	0.185229	No	1.09551
E7EQB8;E9PF84;P51553;P51553-2	>tr|E7EQB8|E7EQB8_HUMAN Isoform of P51553, Isocitrate dehydrogenase [NAD] subunit, mitochondrial OS=Homo sapiens (Human) OX=9606 GN=IDH3G PE=1 SV=1;>tr|E9PF84|E9PF84_HUMAN Isoform of P51553, Isocitrate dehydrogenase [NAD] subunit, mitochondrial (Fragment) OS=Homo sapiens (Human) OX=9606 GN=IDH3G PE=1 SV=1;>sp|P51553|IDH3G_HUMAN Isocitrate dehydrogenase [NAD] subunit gamma, mitochondrial OS=Homo s…	IDH3G	0.695927	0.194993	No	0.185229	No	-1.09542
Q8IVP5	>sp|Q8IVP5|FUND1_HUMAN FUN14 domain-containing protein 1 OS=Homo sapiens (Human) OX=9606 GN=FUNDC1 PE=1 SV=1	FUNDC1	0.66618	0.195946	No	0.185985	No	-1.09307
B4DJV2;O75390	>tr|B4DJV2|B4DJV2_HUMAN Isoform of O75390, Citrate synthase OS=Homo sapiens (Human) OX=9606 GN=CS PE=1 SV=1;>sp|O75390|CISY_HUMAN Citrate synthase, mitochondrial OS=Homo sapiens (Human) OX=9606 GN=CS PE=1 SV=2	CS	0.87424	0.19668	No	0.186533	No	-1.09118
A0A087WVQ6;Q00610;Q00610-2	>tr|A0A087WVQ6|A0A087WVQ6_HUMAN Isoform of Q00610, Clathrin heavy chain OS=Homo sapiens (Human) OX=9606 GN=CLTC PE=1 SV=1;>sp|Q00610|CLH1_HUMAN Clathrin heavy chain 1 OS=Homo sapiens (Human) OX=9606 GN=CLTC PE=1 SV=5;>sp|Q00610-2|CLH1-2_HUMAN Isoform of Q00610, Isoform 2 of Clathrin heavy chain 1 OS=Homo sapiens (Human) OX=9606 GN=CLTC PE=1 SV=5	CLTC	0.890111	0.197545	No	0.18708	No	-1.08892
P62873;P62873-2	>sp|P62873|GBB1_HUMAN Guanine nucleotide-binding protein G(I)/G(S)/G(T) subunit beta-1 OS=Homo sapiens (Human) OX=9606 GN=GNB1 PE=1 SV=3;>sp|P62873-2|GBB1-2_HUMAN Isoform of P62873, Isoform 2 of Guanine nucleotide-binding protein G(I)/G(S)/G(T) subunit beta-1 OS=Homo sapiens (Human) OX=9606 GN=GNB1 PE=1 SV=3	GNB1	1.33549	0.197695	No	0.18708	No	1.08856
Q9P121;Q9P121-2;Q9P121-3;Q9P121-4	>sp|Q9P121|NTRI_HUMAN Neurotrimin OS=Homo sapiens (Human) OX=9606 GN=NTM PE=1 SV=1;>sp|Q9P121-2|NTRI-2_HUMAN Isoform of Q9P121, Isoform 2 of Neurotrimin OS=Homo sapiens (Human) OX=9606 GN=NTM PE=2 SV=1;>sp|Q9P121-3|NTRI-3_HUMAN Isoform of Q9P121, Isoform 3 of Neurotrimin OS=Homo sapiens (Human) OX=9606 GN=NTM PE=2 SV=1;>sp|Q9P121-4|NTRI-4_HUMAN Isoform of Q9P121, Isoform 4 of Neurotrimin OS=Homo …	NTM	1.1677	0.197729	No	0.18708	No	1.08848
O43760;O43760-2	>sp|O43760|SNG2_HUMAN Synaptogyrin-2 OS=Homo sapiens (Human) OX=9606 GN=SYNGR2 PE=1 SV=1;>sp|O43760-2|SNG2-2_HUMAN Isoform of O43760, Isoform 2 of Synaptogyrin-2 OS=Homo sapiens (Human) OX=9606 GN=SYNGR2 PE=1 SV=1	SYNGR2	1.13979	0.198277	No	0.187449	No	1.0871
O95139	>sp|O95139|NDUB6_HUMAN NADH dehydrogenase [ubiquinone] 1 beta subcomplex subunit 6 OS=Homo sapiens (Human) OX=9606 GN=NDUFB6 PE=1 SV=3	NDUFB6	0.728697	0.199233	No	0.188202	No	-1.08467
H0Y6T7;Q92542;Q92542-2	>tr|H0Y6T7|H0Y6T7_HUMAN Isoform of Q92542, Nicastrin (Fragment) OS=Homo sapiens (Human) OX=9606 GN=NCSTN PE=1 SV=1;>sp|Q92542|NICA_HUMAN Nicastrin OS=Homo sapiens (Human) OX=9606 GN=NCSTN PE=1 SV=2;>sp|Q92542-2|NICA-2_HUMAN Isoform of Q92542, Isoform 2 of Nicastrin OS=Homo sapiens (Human) OX=9606 GN=NCSTN PE=1 SV=2	NCSTN	1.19308	0.199893	No	0.18861	No	1.08303
Q15172;Q15172-2	>sp|Q15172|2A5A_HUMAN Serine/threonine-protein phosphatase 2A 56 kDa regulatory subunit alpha isoform OS=Homo sapiens (Human) OX=9606 GN=PPP2R5A PE=1 SV=1;>sp|Q15172-2|2A5A-2_HUMAN Isoform of Q15172, Isoform 2 of Serine/threonine-protein phosphatase 2A 56 kDa regulatory subunit alpha isoform OS=Homo sapiens (Human) OX=9606 GN=PPP2R5A PE=1 SV=1	PPP2R5A	1.24304	0.199982	No	0.18861	No	1.08283
A0A087WWM0;O43617;O43617-2	>tr|A0A087WWM0|A0A087WWM0_HUMAN Isoform of O43617, Trafficking protein particle complex subunit OS=Homo sapiens (Human) OX=9606 GN=TRAPPC3 PE=1 SV=1;>sp|O43617|TPPC3_HUMAN Trafficking protein particle complex subunit 3 OS=Homo sapiens (Human) OX=9606 GN=TRAPPC3 PE=1 SV=1;>sp|O43617-2|TPPC3-2_HUMAN Isoform of O43617, Isoform 2 of Trafficking protein particle complex subunit 3 OS=Homo sapiens (Huma…	TRAPPC3	0.893752	0.200357	No	0.188814	No	-1.0819
Q7RTP6	>sp|Q7RTP6|MICA3_HUMAN [F-actin]-monooxygenase MICAL3 OS=Homo sapiens (Human) OX=9606 GN=MICAL3 PE=1 SV=2	MICAL3	0.70779	0.20144	No	0.189684	No	-1.07917
P23229;P23229-2;P23229-3;P23229-4;P23229-5;P23229-	NA	ITGA6	1.52278	0.201916	No	0.189982	No	1.07795
Q96C19	>sp|Q96C19|EFHD2_HUMAN EF-hand domain-containing protein D2 OS=Homo sapiens (Human) OX=9606 GN=EFHD2 PE=1 SV=1	EFHD2	0.844266	0.202145	No	0.190046	No	-1.07741
P02787	>sp|P02787|TRFE_HUMAN Serotransferrin OS=Homo sapiens (Human) OX=9606 GN=TF PE=1 SV=3	TF	0.703288	0.203178	No	0.190867	No	-1.0748
J3KQ32;Q9NTK5	>tr|J3KQ32|J3KQ32_HUMAN Isoform of Q9NTK5, Obg-like ATPase 1 OS=Homo sapiens (Human) OX=9606 GN=OLA1 PE=1 SV=1;>sp|Q9NTK5|OLA1_HUMAN Obg-like ATPase 1 OS=Homo sapiens (Human) OX=9606 GN=OLA1 PE=1 SV=2	OLA1	1.32085	0.20365	No	0.191159	No	1.07368
P62993	>sp|P62993|GRB2_HUMAN Growth factor receptor-bound protein 2 OS=Homo sapiens (Human) OX=9606 GN=GRB2 PE=1 SV=1	GRB2	1.37101	0.204848	No	0.192002	No	1.07074
D3DTX6;Q96SB3	>tr|D3DTX6|D3DTX6_HUMAN Neurabin-2 OS=Homo sapiens GN=PPP1R9B PE=4 SV=1;>sp|Q96SB3|NEB2_HUMAN Neurabin-2 OS=Homo sapiens (Human) OX=9606 GN=PPP1R9B PE=1 SV=3	PPP1R9B	0.83761	0.204871	No	0.192002	No	-1.07068
P22307;P22307-7;P22307-8	>sp|P22307|NLTP_HUMAN Non-specific lipid-transfer protein OS=Homo sapiens (Human) OX=9606 GN=SCP2 PE=1 SV=2;>sp|P22307-7|NLTP-7_HUMAN Isoform of P22307, Isoform 7 of Non-specific lipid-transfer protein OS=Homo sapiens (Human) OX=9606 GN=SCP2 PE=1 SV=2;>sp|P22307-8|NLTP-8_HUMAN Isoform of P22307, Isoform 8 of Non-specific lipid-transfer protein OS=Homo sapiens (Human) OX=9606 GN=SCP2 PE=1 SV=2	SCP2	1.31375	0.205306	No	0.192257	No	1.06962
H3BPE7;P35637;P35637-2	>tr|H3BPE7|H3BPE7_HUMAN Isoform of P35637, RNA-binding protein FUS OS=Homo sapiens (Human) OX=9606 GN=FUS PE=1 SV=1;>sp|P35637|FUS_HUMAN RNA-binding protein FUS OS=Homo sapiens (Human) OX=9606 GN=FUS PE=1 SV=1;>sp|P35637-2|FUS-2_HUMAN Isoform of P35637, Isoform Short of RNA-binding protein FUS OS=Homo sapiens (Human) OX=9606 GN=FUS PE=1 SV=1	FUS	0.824686	0.205793	No	0.192293	No	-1.06852
O14807	>sp|O14807|RASM_HUMAN Ras-related protein M-Ras OS=Homo sapiens (Human) OX=9606 GN=MRAS PE=1 SV=2	MRAS	1.15898	0.20583	No	0.192293	No	1.06843
Q8IW45	>sp|Q8IW45|NNRD_HUMAN ATP-dependent (S)-NAD(P)H-hydrate dehydratase OS=Homo sapiens (Human) OX=9606 GN=NAXD PE=1 SV=1	NAXD	1.22679	0.205794	No	0.192293	No	1.06852
Q9Y2X7;Q9Y2X7-3	>sp|Q9Y2X7|GIT1_HUMAN ARF GTPase-activating protein GIT1 OS=Homo sapiens (Human) OX=9606 GN=GIT1 PE=1 SV=2;>sp|Q9Y2X7-3|GIT1-3_HUMAN Isoform of Q9Y2X7, Isoform 3 of ARF GTPase-activating protein GIT1 OS=Homo sapiens (Human) OX=9606 GN=GIT1 PE=1 SV=2	GIT1	0.881308	0.206157	No	0.192447	No	-1.0676
H0YGM0;Q9H078;Q9H078-2;Q9H078-4	>tr|H0YGM0|H0YGM0_HUMAN Isoform of Q9H078, ANK_REP_REGION domain-containing protein (Fragment) OS=Homo sapiens (Human) OX=9606 GN=CLPB PE=1 SV=1;>sp|Q9H078|CLPB_HUMAN Caseinolytic peptidase B protein homolog OS=Homo sapiens (Human) OX=9606 GN=CLPB PE=1 SV=1;>sp|Q9H078-2|CLPB-2_HUMAN Isoform of Q9H078, Isoform 2 of Caseinolytic peptidase B protein homolog OS=Homo sapiens (Human) OX=9606 GN=CLPB PE…	CLPB	0.816904	0.207279	No	0.193342	No	-1.06494
K7ELQ9;Q6UW68	>tr|K7ELQ9|K7ELQ9_HUMAN Isoform of Q6UW68, DUF4149 domain-containing protein (Fragment) OS=Homo sapiens (Human) OX=9606 GN=TMEM205 PE=1 SV=1;>sp|Q6UW68|TM205_HUMAN Transmembrane protein 205 OS=Homo sapiens (Human) OX=9606 GN=TMEM205 PE=1 SV=1	TMEM205	1.36622	0.207776	No	0.193654	No	1.06375
Q86YS7-2;Q86YS7-3;Q86YS7-4	>sp|Q86YS7-2|C2CD5-2_HUMAN Isoform of Q86YS7, Isoform 2 of C2 domain-containing protein 5 OS=Homo sapiens (Human) OX=9606 GN=C2CD5 PE=1 SV=1;>sp|Q86YS7-3|C2CD5-3_HUMAN Isoform of Q86YS7, Isoform 3 of C2 domain-containing protein 5 OS=Homo sapiens (Human) OX=9606 GN=C2CD5 PE=1 SV=1;>sp|Q86YS7-4|C2CD5-4_HUMAN Isoform of Q86YS7, Isoform 4 of C2 domain-containing protein 5 OS=Homo sapiens (Human) OX=…	C2CD5	0.842007	0.208321	No	0.19373	No	-1.06237
Q96T76;Q96T76-8;Q96T76-9	>sp|Q96T76|MMS19_HUMAN MMS19 nucleotide excision repair protein homolog OS=Homo sapiens (Human) OX=9606 GN=MMS19 PE=1 SV=2;>sp|Q96T76-8|MMS19-8_HUMAN Isoform of Q96T76, Isoform 5 of MMS19 nucleotide excision repair protein homolog OS=Homo sapiens (Human) OX=9606 GN=MMS19 PE=1 SV=2;>sp|Q96T76-9|MMS19-9_HUMAN Isoform of Q96T76, Isoform 6 of MMS19 nucleotide excision repair protein homolog OS=Homo s…	MMS19	1.49262	0.208347	No	0.19373	No	1.06231
Q5QPL9;Q9UKM9;Q9UKM9-2	>tr|Q5QPL9|Q5QPL9_HUMAN Isoform of Q9UKM9, RRM domain-containing protein (Fragment) OS=Homo sapiens (Human) OX=9606 GN=RALY PE=1 SV=1;>sp|Q9UKM9|RALY_HUMAN RNA-binding protein Raly OS=Homo sapiens (Human) OX=9606 GN=RALY PE=1 SV=1;>sp|Q9UKM9-2|RALY-2_HUMAN Isoform of Q9UKM9, Isoform 1 of RNA-binding protein Raly OS=Homo sapiens (Human) OX=9606 GN=RALY PE=1 SV=1	RALY	0.784652	0.208028	No	0.19373	No	-1.0631
P25787	>sp|P25787|PSA2_HUMAN Proteasome subunit alpha type-2 OS=Homo sapiens (Human) OX=9606 GN=PSMA2 PE=1 SV=2	PSMA2	1.18068	0.208829	No	0.194026	No	1.06117
Q7Z6Z7;Q7Z6Z7-2;Q7Z6Z7-3	>sp|Q7Z6Z7|HUWE1_HUMAN E3 ubiquitin-protein ligase HUWE1 OS=Homo sapiens (Human) OX=9606 GN=HUWE1 PE=1 SV=3;>sp|Q7Z6Z7-2|HUWE1-2_HUMAN Isoform of Q7Z6Z7, Isoform 2 of E3 ubiquitin-protein ligase HUWE1 OS=Homo sapiens (Human) OX=9606 GN=HUWE1 PE=1 SV=3;>sp|Q7Z6Z7-3|HUWE1-3_HUMAN Isoform of Q7Z6Z7, Isoform 3 of E3 ubiquitin-protein ligase HUWE1 OS=Homo sapiens (Human) OX=9606 GN=HUWE1 PE=1 SV=3	HUWE1	0.870974	0.209022	No	0.194054	No	-1.0607
O14908	>sp|O14908|GIPC1_HUMAN PDZ domain-containing protein GIPC1 OS=Homo sapiens (Human) OX=9606 GN=GIPC1 PE=1 SV=2	GIPC1	1.19831	0.209569	No	0.194352	No	1.05937
D6RER5;D6RGI3;Q9NVA2	>tr|D6RER5|D6RER5_HUMAN Isoform of Q9NVA2, Septin-type G domain-containing protein OS=Homo sapiens (Human) OX=9606 GN=SEPTIN11 PE=1 SV=1;>tr|D6RGI3|D6RGI3_HUMAN Isoform of Q9NVA2, Septin-type G domain-containing protein OS=Homo sapiens (Human) OX=9606 GN=SEPTIN11 PE=1 SV=1;>sp|Q9NVA2|SEP11_HUMAN Septin-11 OS=Homo sapiens (Human) OX=9606 GN=SEPTIN11 PE=1 SV=3	SEPTIN11	1.11246	0.209671	No	0.194352	No	1.05911
B7Z264;B7Z2T4;E9PN83;Q15700-3	>tr|B7Z264|B7Z264_HUMAN Disks large homolog 2 OS=Homo sapiens GN=DLG2 PE=2 SV=1;>tr|B7Z2T4|B7Z2T4_HUMAN Isoform of Q15700, Disks large homolog 2 OS=Homo sapiens (Human) OX=9606 GN=DLG2 PE=1 SV=1;>tr|E9PN83|E9PN83_HUMAN Isoform of Q15700, Disks large homolog 2 OS=Homo sapiens (Human) OX=9606 GN=DLG2 PE=1 SV=1;>sp|Q15700-3|DLG2-3_HUMAN Isoform of Q15700, Isoform 3 of Disks large homolog 2 OS=Homo s…	DLG2	0.881488	0.210039	No	0.194542	No	-1.05819
A8MXP9;P43243	>tr|A8MXP9|A8MXP9_HUMAN Isoform of P43243, Matrin-3 OS=Homo sapiens (Human) OX=9606 GN=MATR3 PE=1 SV=1;>sp|P43243|MATR3_HUMAN Matrin-3 OS=Homo sapiens (Human) OX=9606 GN=MATR3 PE=1 SV=2	MATR3	0.854013	0.210826	No	0.195118	No	-1.05626
P41217;P41217-2;P41217-3;U3KQG5	>sp|P41217|OX2G_HUMAN OX-2 membrane glycoprotein OS=Homo sapiens (Human) OX=9606 GN=CD200 PE=1 SV=4;>sp|P41217-2|OX2G-2_HUMAN Isoform of P41217, Isoform 2 of OX-2 membrane glycoprotein OS=Homo sapiens (Human) OX=9606 GN=CD200 PE=2 SV=4;>sp|P41217-3|OX2G-3_HUMAN Isoform of P41217, Isoform 3 of OX-2 membrane glycoprotein OS=Homo sapiens (Human) OX=9606 GN=CD200 PE=2 SV=4;>tr|U3KQG5|U3KQG5_HUMAN Iso…	CD200	0.703054	0.21135	No	0.195451	No	-1.05503
O75340	>sp|O75340|PDCD6_HUMAN Programmed cell death protein 6 OS=Homo sapiens (Human) OX=9606 GN=PDCD6 PE=1 SV=1	PDCD6	0.775517	0.211993	No	0.195862	No	-1.05354
P01009	>sp|P01009|A1AT_HUMAN Alpha-1-antitrypsin OS=Homo sapiens (Human) OX=9606 GN=SERPINA1 PE=1 SV=3	SERPINA1	0.783526	0.21229	No	0.195862	No	-1.05284
H3BS86;Q9UNE7;Q9UNE7-2	>tr|H3BS86|H3BS86_HUMAN Isoform of Q9UNE7, TPR_REGION domain-containing protein (Fragment) OS=Homo sapiens (Human) OX=9606 GN=STUB1 PE=1 SV=8;>sp|Q9UNE7|CHIP_HUMAN E3 ubiquitin-protein ligase CHIP OS=Homo sapiens (Human) OX=9606 GN=STUB1 PE=1 SV=2;>sp|Q9UNE7-2|CHIP-2_HUMAN Isoform of Q9UNE7, Isoform 2 of E3 ubiquitin-protein ligase CHIP OS=Homo sapiens (Human) OX=9606 GN=STUB1 PE=1 SV=2	STUB1	0.752925	0.212211	No	0.195862	No	-1.05301
E9PC74;Q13144	>tr|E9PC74|E9PC74_HUMAN Translation initiation factor eIF-2B subunit epsilon OS=Homo sapiens GN=EIF2B5 PE=1 SV=1;>sp|Q13144|EI2BE_HUMAN Translation initiation factor eIF-2B subunit epsilon OS=Homo sapiens (Human) OX=9606 GN=EIF2B5 PE=1 SV=3	EIF2B5	1.2118	0.213065	No	0.196425	No	1.05106
B1AMS2;Q14141;Q14141-2;Q14141-4	>tr|B1AMS2|B1AMS2_HUMAN Isoform of Q14141, Septin-type G domain-containing protein OS=Homo sapiens (Human) OX=9606 GN=SEPTIN6 PE=1 SV=1;>sp|Q14141|SEPT6_HUMAN Septin-6 OS=Homo sapiens (Human) OX=9606 GN=SEPTIN6 PE=1 SV=4;>sp|Q14141-2|SEPT6-2_HUMAN Isoform of Q14141, Isoform I of Septin-6 OS=Homo sapiens (Human) OX=9606 GN=SEPTIN6 PE=1 SV=4;>sp|Q14141-4|SEPT6-4_HUMAN Isoform of Q14141, Isoform V o…	SEPTIN6	0.903814	0.213344	No	0.196529	No	-1.0504
J3QLI9;P62314	>tr|J3QLI9|J3QLI9_HUMAN Isoform of P62314, Small nuclear ribonucleoprotein Sm D1 OS=Homo sapiens (Human) OX=9606 GN=SNRPD1 PE=1 SV=1;>sp|P62314|SMD1_HUMAN Small nuclear ribonucleoprotein Sm D1 OS=Homo sapiens (Human) OX=9606 GN=SNRPD1 PE=1 SV=1	SNRPD1	1.17519	0.214015	No	0.196995	No	1.04884
E5RGS4;O60925	>tr|E5RGS4|E5RGS4_HUMAN Isoform of O60925, Prefoldin subunit 1 OS=Homo sapiens (Human) OX=9606 GN=PFDN1 PE=1 SV=1;>sp|O60925|PFD1_HUMAN Prefoldin subunit 1 OS=Homo sapiens (Human) OX=9606 GN=PFDN1 PE=1 SV=2	PFDN1	0.880611	0.214208	No	0.19702	No	-1.04836
E9PB13;Q6VAB6	>tr|E9PB13|E9PB13_HUMAN Isoform of Q6VAB6, Kinase suppressor of Ras 2 OS=Homo sapiens (Human) OX=9606 GN=KSR2 PE=1 SV=1;>sp|Q6VAB6|KSR2_HUMAN Kinase suppressor of Ras 2 OS=Homo sapiens (Human) OX=9606 GN=KSR2 PE=1 SV=2	KSR2	0.564009	0.21448	No	0.197117	No	-1.04772
Q9H2X9;Q9H2X9-2	>sp|Q9H2X9|S12A5_HUMAN Solute carrier family 12 member 5 OS=Homo sapiens (Human) OX=9606 GN=SLC12A5 PE=1 SV=3;>sp|Q9H2X9-2|S12A5-2_HUMAN Isoform of Q9H2X9, Isoform 2 of Solute carrier family 12 member 5 OS=Homo sapiens (Human) OX=9606 GN=SLC12A5 PE=1 SV=3	SLC12A5	0.850842	0.215409	No	0.197818	No	-1.04556
F8VVL1;O43583	>tr|F8VVL1|F8VVL1_HUMAN Isoform of O43583, Density-regulated protein OS=Homo sapiens (Human) OX=9606 GN=DENR PE=1 SV=1;>sp|O43583|DENR_HUMAN Density-regulated protein OS=Homo sapiens (Human) OX=9606 GN=DENR PE=1 SV=2	DENR	1.54076	0.215996	No	0.198204	No	1.04425
Q969V3;Q969V3-2	>sp|Q969V3|NCLN_HUMAN Nicalin OS=Homo sapiens (Human) OX=9606 GN=NCLN PE=1 SV=2;>sp|Q969V3-2|NCLN-2_HUMAN Isoform of Q969V3, Isoform 2 of Nicalin OS=Homo sapiens (Human) OX=9606 GN=NCLN PE=1 SV=2	NCLN	0.83092	0.217235	No	0.199033	No	-1.0414
E9PLE4;E9PS47;Q9BVG9	>tr|E9PLE4|E9PLE4_HUMAN Isoform of Q9BVG9, Phosphatidylserine synthase 2 OS=Homo sapiens (Human) OX=9606 GN=PTDSS2 PE=1 SV=1;>tr|E9PS47|E9PS47_HUMAN Isoform of Q9BVG9, Phosphatidylserine synthase 2 OS=Homo sapiens (Human) OX=9606 GN=PTDSS2 PE=1 SV=1;>sp|Q9BVG9|PTSS2_HUMAN Phosphatidylserine synthase 2 OS=Homo sapiens (Human) OX=9606 GN=PTDSS2 PE=1 SV=1	PTDSS2	1.35983	0.2171	No	0.199033	No	1.0417
F5H3E1	>tr|F5H3E1|F5H3E1_HUMAN Isoform of Q8IX12, DBC1 domain-containing protein OS=Homo sapiens (Human) OX=9606 GN=CCAR1 PE=1 SV=1	CCAR1	0.786309	0.217425	No	0.199053	No	-1.04098
Q08174;Q08174-2	>sp|Q08174|PCDH1_HUMAN Protocadherin-1 OS=Homo sapiens (Human) OX=9606 GN=PCDH1 PE=1 SV=2;>sp|Q08174-2|PCDH1-2_HUMAN Isoform of Q08174, Isoform 2 of Protocadherin-1 OS=Homo sapiens (Human) OX=9606 GN=PCDH1 PE=1 SV=2	PCDH1	1.13748	0.218042	No	0.199465	No	1.03952
B1AJQ6;Q86Y82	>tr|B1AJQ6|B1AJQ6_HUMAN Isoform of Q86Y82, SynN domain-containing protein (Fragment) OS=Homo sapiens (Human) OX=9606 GN=STX12 PE=1 SV=2;>sp|Q86Y82|STX12_HUMAN Syntaxin-12 OS=Homo sapiens (Human) OX=9606 GN=STX12 PE=1 SV=1	STX12	0.661585	0.218429	No	0.199665	No	-1.03858
A0A0A0MRX2;Q96HY6;Q96HY6-2	>tr|A0A0A0MRX2|A0A0A0MRX2_HUMAN Isoform of Q96HY6, DDRGK domain-containing protein 1 OS=Homo sapiens (Human) OX=9606 GN=DDRGK1 PE=1 SV=1;>sp|Q96HY6|DDRGK_HUMAN DDRGK domain-containing protein 1 OS=Homo sapiens (Human) OX=9606 GN=DDRGK1 PE=1 SV=2;>sp|Q96HY6-2|DDRGK-2_HUMAN Isoform of Q96HY6, Isoform 2 of DDRGK domain-containing protein 1 OS=Homo sapiens (Human) OX=9606 GN=DDRGK1 PE=1 SV=2	DDRGK1	1.42799	0.219132	No	0.200153	No	1.03691
Q12768	>sp|Q12768|WASC5_HUMAN WASH complex subunit 5 OS=Homo sapiens (Human) OX=9606 GN=WASHC5 PE=1 SV=1	WASHC5	1.23073	0.219975	No	0.200768	No	1.03493
Q9UIW2	>sp|Q9UIW2|PLXA1_HUMAN Plexin-A1 OS=Homo sapiens (Human) OX=9606 GN=PLXNA1 PE=1 SV=3	PLXNA1	0.847506	0.220483	No	0.200924	No	-1.03372
A0A087WW40;Q9Y371;Q9Y371-2	>tr|A0A087WW40|A0A087WW40_HUMAN Isoform of Q9Y371, Endophilin-B1 OS=Homo sapiens (Human) OX=9606 GN=SH3GLB1 PE=1 SV=1;>sp|Q9Y371|SHLB1_HUMAN Endophilin-B1 OS=Homo sapiens (Human) OX=9606 GN=SH3GLB1 PE=1 SV=1;>sp|Q9Y371-2|SHLB1-2_HUMAN Isoform of Q9Y371, Isoform 2 of Endophilin-B1 OS=Homo sapiens (Human) OX=9606 GN=SH3GLB1 PE=1 SV=1	SH3GLB1	1.19986	0.22037	No	0.200924	No	1.034
P17677;P17677-2	>sp|P17677|NEUM_HUMAN Neuromodulin OS=Homo sapiens (Human) OX=9606 GN=GAP43 PE=1 SV=1;>sp|P17677-2|NEUM-2_HUMAN Isoform of P17677, Isoform 2 of Neuromodulin OS=Homo sapiens (Human) OX=9606 GN=GAP43 PE=1 SV=1	GAP43	0.817301	0.22066	No	0.20093	No	-1.03329
P63000;P63000-2	>sp|P63000|RAC1_HUMAN Ras-related C3 botulinum toxin substrate 1 OS=Homo sapiens (Human) OX=9606 GN=RAC1 PE=1 SV=1;>sp|P63000-2|RAC1-2_HUMAN Isoform of P63000, Isoform B of Ras-related C3 botulinum toxin substrate 1 OS=Homo sapiens (Human) OX=9606 GN=RAC1 PE=1 SV=1	RAC1	1.16698	0.222313	No	0.202281	No	1.02964
P04003	>sp|P04003|C4BPA_HUMAN C4b-binding protein alpha chain OS=Homo sapiens (Human) OX=9606 GN=C4BPA PE=1 SV=2	C4BPA	1.57552	0.222956	No	0.2024	No	1.02818
Q9ULC4;Q9ULC4-3	>sp|Q9ULC4|MCTS1_HUMAN Malignant T-cell-amplified sequence 1 OS=Homo sapiens (Human) OX=9606 GN=MCTS1 PE=1 SV=1;>sp|Q9ULC4-3|MCTS1-3_HUMAN Isoform of Q9ULC4, Isoform 3 of Malignant T-cell-amplified sequence 1 OS=Homo sapiens (Human) OX=9606 GN=MCTS1 PE=1 SV=1	MCTS1	1.19622	0.222765	No	0.2024	No	1.02862
Q9H2G2;Q9H2G2-2	>sp|Q9H2G2|SLK_HUMAN STE20-like serine/threonine-protein kinase OS=Homo sapiens (Human) OX=9606 GN=SLK PE=1 SV=1;>sp|Q9H2G2-2|SLK-2_HUMAN Isoform of Q9H2G2, Isoform 2 of STE20-like serine/threonine-protein kinase OS=Homo sapiens (Human) OX=9606 GN=SLK PE=1 SV=1	SLK	1.21877	0.222844	No	0.2024	No	1.02843
P23297;Q5T7Y6	>sp|P23297|S10A1_HUMAN Protein S100-A1 OS=Homo sapiens (Human) OX=9606 GN=S100A1 PE=1 SV=2;>tr|Q5T7Y6|Q5T7Y6_HUMAN Isoform of P23297, Protein S100 OS=Homo sapiens (Human) OX=9606 GN=S100A1 PE=1 SV=1	S100A1	1.37206	0.223256	No	0.202518	No	1.0275
P08107	>sp|P08107|HSP71_HUMAN Heat shock 70 kDa protein 1A/1B OS=Homo sapiens GN=HSPA1A PE=1 SV=5	HSPA1A	1.17471	0.224318	No	0.203171	No	1.02499
P55072	>sp|P55072|TERA_HUMAN Transitional endoplasmic reticulum ATPase OS=Homo sapiens (Human) OX=9606 GN=VCP PE=1 SV=4	VCP	1.10653	0.224288	No	0.203171	No	1.02506
Q86VX2;Q86VX2-2	>sp|Q86VX2|COMD7_HUMAN COMM domain-containing protein 7 OS=Homo sapiens (Human) OX=9606 GN=COMMD7 PE=1 SV=2;>sp|Q86VX2-2|COMD7-2_HUMAN Isoform of Q86VX2, Isoform 2 of COMM domain-containing protein 7 OS=Homo sapiens (Human) OX=9606 GN=COMMD7 PE=1 SV=2	COMMD7	1.21239	0.224836	No	0.203256	No	1.02377
P78344;P78344-2	>sp|P78344|IF4G2_HUMAN Eukaryotic translation initiation factor 4 gamma 2 OS=Homo sapiens (Human) OX=9606 GN=EIF4G2 PE=1 SV=1;>sp|P78344-2|IF4G2-2_HUMAN Isoform of P78344, Isoform 2 of Eukaryotic translation initiation factor 4 gamma 2 OS=Homo sapiens (Human) OX=9606 GN=EIF4G2 PE=1 SV=1	EIF4G2	0.836145	0.224925	No	0.203256	No	-1.02358
I3L3S0;I3L3V5;Q9Y5R8	>tr|I3L3S0|I3L3S0_HUMAN Isoform of Q9Y5R8, Trafficking protein particle complex subunit 1 (Fragment) OS=Homo sapiens (Human) OX=9606 GN=TRAPPC1 PE=1 SV=1;>tr|I3L3V5|I3L3V5_HUMAN Isoform of Q9Y5R8, Trafficking protein particle complex subunit 1 (Fragment) OS=Homo sapiens (Human) OX=9606 GN=TRAPPC1 PE=1 SV=1;>sp|Q9Y5R8|TPPC1_HUMAN Trafficking protein particle complex subunit 1 OS=Homo sapiens (Huma…	TRAPPC1	1.12172	0.224654	No	0.203256	No	1.02418
E5RJU9;Q86UE4	>tr|E5RJU9|E5RJU9_HUMAN Isoform of Q86UE4, Protein LYRIC OS=Homo sapiens (Human) OX=9606 GN=MTDH PE=1 SV=1;>sp|Q86UE4|LYRIC_HUMAN Protein LYRIC OS=Homo sapiens (Human) OX=9606 GN=MTDH PE=1 SV=2	MTDH	0.807076	0.225135	No	0.20329	No	-1.0231
P50991	>sp|P50991|TCPD_HUMAN T-complex protein 1 subunit delta OS=Homo sapiens (Human) OX=9606 GN=CCT4 PE=1 SV=4	CCT4	0.894793	0.226065	No	0.203976	No	-1.02099
O14936;O14936-2;O14936-3;O14936-4;O14936-6	>sp|O14936|CSKP_HUMAN Peripheral plasma membrane protein CASK OS=Homo sapiens (Human) OX=9606 GN=CASK PE=1 SV=3;>sp|O14936-2|CSKP-2_HUMAN Isoform of O14936, Isoform 2 of Peripheral plasma membrane protein CASK OS=Homo sapiens (Human) OX=9606 GN=CASK PE=1 SV=3;>sp|O14936-3|CSKP-3_HUMAN Isoform of O14936, Isoform 3 of Peripheral plasma membrane protein CASK OS=Homo sapiens (Human) OX=9606 GN=CASK P…	CASK	1.17589	0.228128	No	0.205011	No	1.01634
A0A0A0MTI5;B8ZWD1;P07108;P07108-2;P07108-3;P07108-	NA	DBI	0.549851	0.227936	No	0.205011	No	-1.01677
Q5JX83;Q96MM6	>tr|Q5JX83|Q5JX83_HUMAN Isoform of Q96MM6, Heat shock 70 kDa protein 12B OS=Homo sapiens (Human) OX=9606 GN=HSPA12B PE=1 SV=2;>sp|Q96MM6|HS12B_HUMAN Heat shock 70 kDa protein 12B OS=Homo sapiens (Human) OX=9606 GN=HSPA12B PE=1 SV=2	HSPA12B	0.698238	0.228168	No	0.205011	No	-1.01625
Q9Y639	>sp|Q9Y639|NPTN_HUMAN Neuroplastin OS=Homo sapiens (Human) OX=9606 GN=NPTN PE=1 SV=2	NPTN	0.875491	0.227807	No	0.205011	No	-1.01706
A4D1I0;Q9ULJ8;Q9ULJ8-3;Q9ULJ8-4;Q9ULJ8-5	>tr|A4D1I0|A4D1I0_HUMAN HCG1741805, isoform CRA_c OS=Homo sapiens GN=PPP1R9A PE=4 SV=1;>sp|Q9ULJ8|NEB1_HUMAN Neurabin-1 OS=Homo sapiens (Human) OX=9606 GN=PPP1R9A PE=1 SV=2;>sp|Q9ULJ8-3|NEB1-3_HUMAN Isoform of Q9ULJ8, Isoform 3 of Neurabin-1 OS=Homo sapiens (Human) OX=9606 GN=PPP1R9A PE=1 SV=2;>sp|Q9ULJ8-4|NEB1-4_HUMAN Isoform of Q9ULJ8, Isoform 4 of Neurabin-1 OS=Homo sapiens (Human) OX=9606 GN=…	PPP1R9A	0.612768	0.228103	No	0.205011	No	-1.01639
Q06323;Q06323-2;Q06323-3	>sp|Q06323|PSME1_HUMAN Proteasome activator complex subunit 1 OS=Homo sapiens (Human) OX=9606 GN=PSME1 PE=1 SV=1;>sp|Q06323-2|PSME1-2_HUMAN Isoform of Q06323, Isoform 2 of Proteasome activator complex subunit 1 OS=Homo sapiens (Human) OX=9606 GN=PSME1 PE=1 SV=1;>sp|Q06323-3|PSME1-3_HUMAN Isoform of Q06323, Isoform 3 of Proteasome activator complex subunit 1 OS=Homo sapiens (Human) OX=9606 GN=PSME…	PSME1	1.45127	0.228249	No	0.205011	No	1.01608
E9PKS9;E9PN70;E9PQE8;Q9Y296;Q9Y296-2	>tr|E9PKS9|E9PKS9_HUMAN Isoform of Q9Y296, Trafficking protein particle complex subunit 4 OS=Homo sapiens (Human) OX=9606 GN=TRAPPC4 PE=1 SV=1;>tr|E9PN70|E9PN70_HUMAN Isoform of Q9Y296, Trafficking protein particle complex subunit 4 OS=Homo sapiens (Human) OX=9606 GN=TRAPPC4 PE=1 SV=1;>tr|E9PQE8|E9PQE8_HUMAN Isoform of Q9Y296, Trafficking protein particle complex subunit 4 OS=Homo sapiens (Human)…	TRAPPC4	0.809713	0.228529	No	0.205108	No	-1.01542
E5RIF2;Q9Y6D6	>tr|E5RIF2|E5RIF2_HUMAN Isoform of Q9Y6D6, SEC7 domain-containing protein (Fragment) OS=Homo sapiens (Human) OX=9606 GN=ARFGEF1 PE=1 SV=2;>sp|Q9Y6D6|BIG1_HUMAN Brefeldin A-inhibited guanine nucleotide-exchange protein 1 OS=Homo sapiens (Human) OX=9606 GN=ARFGEF1 PE=1 SV=2	ARFGEF1	0.830175	0.229557	No	0.205705	No	-1.01306
Q8N3J6;Q8N3J6-2;Q8N3J6-3;Q8N3J6-4;Q8N3J6-5	>sp|Q8N3J6|CADM2_HUMAN Cell adhesion molecule 2 OS=Homo sapiens (Human) OX=9606 GN=CADM2 PE=2 SV=1;>sp|Q8N3J6-2|CADM2-2_HUMAN Isoform of Q8N3J6, Isoform 2 of Cell adhesion molecule 2 OS=Homo sapiens (Human) OX=9606 GN=CADM2 PE=2 SV=1;>sp|Q8N3J6-3|CADM2-3_HUMAN Isoform of Q8N3J6, Isoform 3 of Cell adhesion molecule 2 OS=Homo sapiens (Human) OX=9606 GN=CADM2 PE=2 SV=1;>sp|Q8N3J6-4|CADM2-4_HUMAN Iso…	CADM2	0.807375	0.22952	No	0.205705	No	-1.01314
D6RG39;D6RIT9;Q9NX40;Q9NX40-2;Q9NX40-3;Q9NX40-4	>tr|D6RG39|D6RG39_HUMAN Isoform of Q9NX40, OCIA domain-containing protein (Fragment) OS=Homo sapiens (Human) OX=9606 GN=OCIAD1 PE=1 SV=1;>tr|D6RIT9|D6RIT9_HUMAN Isoform of Q9NX40, OCIA domain-containing protein (Fragment) OS=Homo sapiens (Human) OX=9606 GN=OCIAD1 PE=1 SV=1;>sp|Q9NX40|OCAD1_HUMAN OCIA domain-containing protein 1 OS=Homo sapiens (Human) OX=9606 GN=OCIAD1 PE=1 SV=1;>sp|Q9NX40-2|OCAD…	OCIAD1	0.850911	0.229714	No	0.205705	No	-1.01271
P09960	>sp|P09960|LKHA4_HUMAN Leukotriene A-4 hydrolase OS=Homo sapiens (Human) OX=9606 GN=LTA4H PE=1 SV=2	LTA4H	1.17873	0.230299	No	0.206073	No	1.01139
A0A087WX10;A0A0A0MQV0;A0A0A0MS42;G3V4M2;G3V5E8;P54	NA	GALC	0.644746	0.230546	No	0.206139	No	-1.01083
A8MVZ9;P09972	>tr|A8MVZ9|A8MVZ9_HUMAN Isoform of P09972, Fructose-bisphosphate aldolase OS=Homo sapiens (Human) OX=9606 GN=ALDOC PE=1 SV=1;>sp|P09972|ALDOC_HUMAN Fructose-bisphosphate aldolase C OS=Homo sapiens (Human) OX=9606 GN=ALDOC PE=1 SV=2	ALDOC	0.836233	0.231474	No	0.206813	No	-1.0088
Q7Z3U7;Q7Z3U7-2;Q7Z3U7-5;Q7Z3U7-6	>sp|Q7Z3U7|MON2_HUMAN Protein MON2 homolog OS=Homo sapiens (Human) OX=9606 GN=MON2 PE=1 SV=3;>sp|Q7Z3U7-2|MON2-2_HUMAN Isoform of Q7Z3U7, Isoform 2 of Protein MON2 homolog OS=Homo sapiens (Human) OX=9606 GN=MON2 PE=1 SV=3;>sp|Q7Z3U7-5|MON2-5_HUMAN Isoform of Q7Z3U7, Isoform 5 of Protein MON2 homolog OS=Homo sapiens (Human) OX=9606 GN=MON2 PE=1 SV=3;>sp|Q7Z3U7-6|MON2-6_HUMAN Isoform of Q7Z3U7, Iso…	MON2	1.15177	0.231889	No	0.207028	No	1.0079
Q13825	>sp|Q13825|AUHM_HUMAN Methylglutaconyl-CoA hydratase, mitochondrial OS=Homo sapiens (Human) OX=9606 GN=AUH PE=1 SV=1	AUH	0.825789	0.233027	No	0.207732	No	-1.00542
H7BYJ3;O14578;O14578-3;O14578-4	>tr|H7BYJ3|H7BYJ3_HUMAN Isoform of O14578, Citron Rho-interacting kinase (Fragment) OS=Homo sapiens (Human) OX=9606 GN=CIT PE=1 SV=1;>sp|O14578|CTRO_HUMAN Citron Rho-interacting kinase OS=Homo sapiens (Human) OX=9606 GN=CIT PE=1 SV=2;>sp|O14578-3|CTRO-3_HUMAN Isoform of O14578, Isoform 3 of Citron Rho-interacting kinase OS=Homo sapiens (Human) OX=9606 GN=CIT PE=1 SV=2;>sp|O14578-4|CTRO-4_HUMAN Is…	CIT	1.38929	0.232969	No	0.207732	No	1.00553
B3KVN2;E9PPM9;E9PQP6;H0YCW1;P49354;P49354-2	>tr|B3KVN2|B3KVN2_HUMAN Isoform of P49354, Farnesyltransferase, CAAX box, alpha, isoform CRA_c OS=Homo sapiens (Human) OX=9606 GN=FNTA PE=1 SV=1;>tr|E9PPM9|E9PPM9_HUMAN Isoform of P49354, Protein farnesyltransferase/geranylgeranyltransferase type-1 subunit alpha (Fragment) OS=Homo sapiens (Human) OX=9606 GN=FNTA PE=1 SV=1;>tr|E9PQP6|E9PQP6_HUMAN Isoform of P49354, Protein farnesyltransferase/gera…	FNTA	1.18832	0.233429	No	0.207934	No	1.00455
C9JA36;C9JXZ1;P54709;P54709-2	>tr|C9JA36|C9JA36_HUMAN Isoform of P54709, Sodium/potassium-transporting ATPase subunit beta-3 (Fragment) OS=Homo sapiens (Human) OX=9606 GN=ATP1B3 PE=1 SV=1;>tr|C9JXZ1|C9JXZ1_HUMAN Isoform of P54709, Sodium/potassium-transporting ATPase subunit beta-3 (Fragment) OS=Homo sapiens (Human) OX=9606 GN=ATP1B3 PE=1 SV=1;>sp|P54709|AT1B3_HUMAN Sodium/potassium-transporting ATPase subunit beta-3 OS=Homo …	ATP1B3	1.18361	0.234705	No	0.208914	No	1.0017
E7EMR3;E7EN28;E7ENK1;E7ES20;E7ESV6;E7ETE3;E7EUP0;E	NA	ADGRL3	0.800997	0.23521	No	0.209207	No	-1.00057
Q96JJ7	>sp|Q96JJ7|TMX3_HUMAN Protein disulfide-isomerase TMX3 OS=Homo sapiens (Human) OX=9606 GN=TMX3 PE=1 SV=2	TMX3	0.808343	0.235571	No	0.20937	No	-0.999774
Q6P1N0;Q6P1N0-2	>sp|Q6P1N0|C2D1A_HUMAN Coiled-coil and C2 domain-containing protein 1A OS=Homo sapiens (Human) OX=9606 GN=CC2D1A PE=1 SV=1;>sp|Q6P1N0-2|C2D1A-2_HUMAN Isoform of Q6P1N0, Isoform 2 of Coiled-coil and C2 domain-containing protein 1A OS=Homo sapiens (Human) OX=9606 GN=CC2D1A PE=1 SV=1	CC2D1A	1.65933	0.236142	No	0.209564	No	0.998535
P52564	>sp|P52564|MP2K6_HUMAN Dual specificity mitogen-activated protein kinase kinase 6 OS=Homo sapiens (Human) OX=9606 GN=MAP2K6 PE=1 SV=1	MAP2K6	0.719822	0.236103	No	0.209564	No	-0.998622
P49588	>sp|P49588|SYAC_HUMAN Alanine--tRNA ligase, cytoplasmic OS=Homo sapiens (Human) OX=9606 GN=AARS PE=1 SV=2	AARS	1.14393	0.236636	No	0.209846	No	0.997435
Q99436	>sp|Q99436|PSB7_HUMAN Proteasome subunit beta type-7 OS=Homo sapiens (Human) OX=9606 GN=PSMB7 PE=1 SV=1	PSMB7	1.13029	0.237217	No	0.210204	No	0.996103
Q92561	>sp|Q92561|PHYIP_HUMAN Phytanoyl-CoA hydroxylase-interacting protein OS=Homo sapiens (Human) OX=9606 GN=PHYHIP PE=1 SV=1	PHYHIP	0.886807	0.239588	No	0.212146	No	-0.99094
Q00535	>sp|Q00535|CDK5_HUMAN Cyclin-dependent-like kinase 5 OS=Homo sapiens (Human) OX=9606 GN=CDK5 PE=1 SV=3	CDK5	0.832039	0.239831	No	0.212204	No	-0.99042
P00492	>sp|P00492|HPRT_HUMAN Hypoxanthine-guanine phosphoribosyltransferase OS=Homo sapiens (Human) OX=9606 GN=HPRT1 PE=1 SV=2	HPRT1	0.731587	0.240147	No	0.212325	No	-0.989705
H3BR94;H3BS05;H3BUD2;Q9BTE1;Q9BTE1-2;Q9BTE1-3	>tr|H3BR94|H3BR94_HUMAN Isoform of Q9BTE1, Dynactin subunit 5 OS=Homo sapiens (Human) OX=9606 GN=DCTN5 PE=1 SV=1;>tr|H3BS05|H3BS05_HUMAN Isoform of Q9BTE1, Dynactin subunit 5 OS=Homo sapiens (Human) OX=9606 GN=DCTN5 PE=1 SV=1;>tr|H3BUD2|H3BUD2_HUMAN Isoform of Q9BTE1, Dynactin subunit 5 OS=Homo sapiens (Human) OX=9606 GN=DCTN5 PE=1 SV=1;>sp|Q9BTE1|DCTN5_HUMAN Dynactin subunit 5 OS=Homo sapiens (H…	DCTN5	1.31109	0.240648	No	0.212497	No	0.988577
Q5TH30;Q9UGV2;Q9UGV2-2;Q9UGV2-3	>tr|Q5TH30|Q5TH30_HUMAN Isoform of Q9UGV2, NDRG family member 3, isoform CRA_c OS=Homo sapiens (Human) OX=9606 GN=NDRG3 PE=1 SV=1;>sp|Q9UGV2|NDRG3_HUMAN Protein NDRG3 OS=Homo sapiens (Human) OX=9606 GN=NDRG3 PE=1 SV=2;>sp|Q9UGV2-2|NDRG3-2_HUMAN Isoform of Q9UGV2, Isoform 2 of Protein NDRG3 OS=Homo sapiens (Human) OX=9606 GN=NDRG3 PE=1 SV=2;>sp|Q9UGV2-3|NDRG3-3_HUMAN Isoform of Q9UGV2, Isoform 3 o…	NDRG3	0.907012	0.240879	No	0.212497	No	-0.988101
Q684P5;Q684P5-2;Q684P5-3	>sp|Q684P5|RPGP2_HUMAN Rap1 GTPase-activating protein 2 OS=Homo sapiens (Human) OX=9606 GN=RAP1GAP2 PE=1 SV=2;>sp|Q684P5-2|RPGP2-2_HUMAN Isoform of Q684P5, Isoform 2 of Rap1 GTPase-activating protein 2 OS=Homo sapiens (Human) OX=9606 GN=RAP1GAP2 PE=1 SV=2;>sp|Q684P5-3|RPGP2-3_HUMAN Isoform of Q684P5, Isoform 3 of Rap1 GTPase-activating protein 2 OS=Homo sapiens (Human) OX=9606 GN=RAP1GAP2 PE=1 SV…	RAP1GAP2	0.765247	0.240815	No	0.212497	No	-0.988239
Q14697	>sp|Q14697|GANAB_HUMAN Neutral alpha-glucosidase AB OS=Homo sapiens (Human) OX=9606 GN=GANAB PE=1 SV=3	GANAB	1.12266	0.242564	No	0.213689	No	0.984465
P63151;P63151-2	>sp|P63151|2ABA_HUMAN Serine/threonine-protein phosphatase 2A 55 kDa regulatory subunit B alpha isoform OS=Homo sapiens (Human) OX=9606 GN=PPP2R2A PE=1 SV=1;>sp|P63151-2|2ABA-2_HUMAN Isoform of P63151, Isoform 2 of Serine/threonine-protein phosphatase 2A 55 kDa regulatory subunit B alpha isoform OS=Homo sapiens (Human) OX=9606 GN=PPP2R2A PE=1 SV=1	PPP2R2A	0.870004	0.242589	No	0.213689	No	-0.984415
O96005;O96005-3;O96005-4	>sp|O96005|CLPT1_HUMAN Cleft lip and palate transmembrane protein 1 OS=Homo sapiens (Human) OX=9606 GN=CLPTM1 PE=1 SV=1;>sp|O96005-3|CLPT1-3_HUMAN Isoform of O96005, Isoform 2 of Cleft lip and palate transmembrane protein 1 OS=Homo sapiens (Human) OX=9606 GN=CLPTM1 PE=1 SV=1;>sp|O96005-4|CLPT1-4_HUMAN Isoform of O96005, Isoform 3 of Cleft lip and palate transmembrane protein 1 OS=Homo sapiens (Hu…	CLPTM1	2.29484	0.24284	No	0.213752	No	0.98389
P61009	>sp|P61009|SPCS3_HUMAN Signal peptidase complex subunit 3 OS=Homo sapiens (Human) OX=9606 GN=SPCS3 PE=1 SV=1	SPCS3	1.25704	0.243812	No	0.214448	No	0.981839
P63215	>sp|P63215|GBG3_HUMAN Guanine nucleotide-binding protein G(I)/G(S)/G(O) subunit gamma-3 OS=Homo sapiens (Human) OX=9606 GN=GNG3 PE=1 SV=1	GNG3	0.776049	0.245354	No	0.215644	No	-0.978556
P62857	>sp|P62857|RS28_HUMAN 40S ribosomal protein S28 OS=Homo sapiens (Human) OX=9606 GN=RPS28 PE=1 SV=1	RPS28	0.475983	0.245892	No	0.215907	No	-0.977387
Q9UEU0	>sp|Q9UEU0|VTI1B_HUMAN Vesicle transport through interaction with t-SNAREs homolog 1B OS=Homo sapiens (Human) OX=9606 GN=VTI1B PE=1 SV=3	VTI1B	0.916367	0.246017	No	0.215907	No	-0.977141
Q9UNS2	>sp|Q9UNS2|CSN3_HUMAN COP9 signalosome complex subunit 3 OS=Homo sapiens (Human) OX=9606 GN=COPS3 PE=1 SV=3	COPS3	1.16416	0.247225	No	0.216808	No	0.974594
E7ERK8;F5H6L3;Q17R89;Q17R89-2;Q17R89-3	>tr|E7ERK8|E7ERK8_HUMAN Isoform of Q17R89, Rho GTPase-activating protein 44 OS=Homo sapiens (Human) OX=9606 GN=ARHGAP44 PE=1 SV=3;>tr|F5H6L3|F5H6L3_HUMAN Isoform of Q17R89, Rho GTPase-activating protein 44 OS=Homo sapiens (Human) OX=9606 GN=ARHGAP44 PE=1 SV=2;>sp|Q17R89|RHG44_HUMAN Rho GTPase-activating protein 44 OS=Homo sapiens (Human) OX=9606 GN=ARHGAP44 PE=1 SV=1;>sp|Q17R89-2|RHG44-2_HUMAN Is…	ARHGAP44	0.865185	0.247517	No	0.216903	No	-0.974002
Q9NUJ1	>sp|Q9NUJ1|ABHDA_HUMAN Mycophenolic acid acyl-glucuronide esterase, mitochondrial OS=Homo sapiens (Human) OX=9606 GN=ABHD10 PE=1 SV=1	ABHD10	0.850997	0.24788	No	0.216925	No	-0.9732
Q9C040	>sp|Q9C040|TRIM2_HUMAN Tripartite motif-containing protein 2 OS=Homo sapiens (Human) OX=9606 GN=TRIM2 PE=1 SV=1	TRIM2	0.892377	0.247908	No	0.216925	No	-0.973144
A0AVT1	>sp|A0AVT1|UBA6_HUMAN Ubiquitin-like modifier-activating enzyme 6 OS=Homo sapiens (Human) OX=9606 GN=UBA6 PE=1 SV=1	UBA6	1.13153	0.248247	No	0.217062	No	0.972466
K7ELX4;P22830;P22830-2	>tr|K7ELX4|K7ELX4_HUMAN Isoform of P22830, Ferrochelatase, mitochondrial (Fragment) OS=Homo sapiens (Human) OX=9606 GN=FECH PE=1 SV=1;>sp|P22830|HEMH_HUMAN Ferrochelatase, mitochondrial OS=Homo sapiens (Human) OX=9606 GN=FECH PE=1 SV=2;>sp|P22830-2|HEMH-2_HUMAN Isoform of P22830, Isoform 2 of Ferrochelatase, mitochondrial OS=Homo sapiens (Human) OX=9606 GN=FECH PE=1 SV=2	FECH	0.774045	0.250256	No	0.218658	No	-0.968187
C9JAK5	>tr|C9JAK5|C9JAK5_HUMAN Isoform of P18085, ADP-ribosylation factor 4 OS=Homo sapiens (Human) OX=9606 GN=ARF4 PE=1 SV=1	ARF4	1.13207	0.250932	No	0.219087	No	0.966785
Q15904	>sp|Q15904|VAS1_HUMAN V-type proton ATPase subunit S1 OS=Homo sapiens (Human) OX=9606 GN=ATP6AP1 PE=1 SV=2	ATP6AP1	0.845259	0.251734	No	0.219304	No	-0.965073
A0A0A0MSQ0;P13797-2	>tr|A0A0A0MSQ0|A0A0A0MSQ0_HUMAN Isoform of P13797, Plastin-3 OS=Homo sapiens (Human) OX=9606 GN=PLS3 PE=1 SV=1;>sp|P13797-2|PLST-2_HUMAN Isoform of P13797, Isoform 2 of Plastin-3 OS=Homo sapiens (Human) OX=9606 GN=PLS3 PE=1 SV=4	PLS3	0.847385	0.251366	No	0.219304	No	-0.965874
Q9P0L0;Q9P0L0-2	>sp|Q9P0L0|VAPA_HUMAN Vesicle-associated membrane protein-associated protein A OS=Homo sapiens (Human) OX=9606 GN=VAPA PE=1 SV=3;>sp|Q9P0L0-2|VAPA-2_HUMAN Isoform of Q9P0L0, Isoform 2 of Vesicle-associated membrane protein-associated protein A OS=Homo sapiens (Human) OX=9606 GN=VAPA PE=1 SV=3	VAPA	0.843065	0.251607	No	0.219304	No	-0.965344
P13010	>sp|P13010|XRCC5_HUMAN X-ray repair cross-complementing protein 5 OS=Homo sapiens (Human) OX=9606 GN=XRCC5 PE=1 SV=3	XRCC5	1.16171	0.25315	No	0.220375	No	0.962194
Q96A65	>sp|Q96A65|EXOC4_HUMAN Exocyst complex component 4 OS=Homo sapiens (Human) OX=9606 GN=EXOC4 PE=1 SV=1	EXOC4	1.15346	0.253497	No	0.220516	No	0.961434
C9JRZ6;Q9NX63	>tr|C9JRZ6|C9JRZ6_HUMAN Isoform of Q9NX63, MICOS complex subunit OS=Homo sapiens (Human) OX=9606 GN=CHCHD3 PE=1 SV=2;>sp|Q9NX63|MIC19_HUMAN MICOS complex subunit MIC19 OS=Homo sapiens (Human) OX=9606 GN=CHCHD3 PE=1 SV=1	CHCHD3	0.873879	0.254133	No	0.220586	No	-0.960161
Q14008;Q14008-2;Q14008-3	>sp|Q14008|CKAP5_HUMAN Cytoskeleton-associated protein 5 OS=Homo sapiens (Human) OX=9606 GN=CKAP5 PE=1 SV=3;>sp|Q14008-2|CKAP5-2_HUMAN Isoform of Q14008, Isoform 2 of Cytoskeleton-associated protein 5 OS=Homo sapiens (Human) OX=9606 GN=CKAP5 PE=1 SV=3;>sp|Q14008-3|CKAP5-3_HUMAN Isoform of Q14008, Isoform 3 of Cytoskeleton-associated protein 5 OS=Homo sapiens (Human) OX=9606 GN=CKAP5 PE=1 SV=3	CKAP5	0.882265	0.254135	No	0.220586	No	-0.960154
P49915	>sp|P49915|GUAA_HUMAN GMP synthase [glutamine-hydrolyzing] OS=Homo sapiens (Human) OX=9606 GN=GMPS PE=1 SV=1	GMPS	0.767041	0.254106	No	0.220586	No	-0.96021
Q13496	>sp|Q13496|MTM1_HUMAN Myotubularin OS=Homo sapiens (Human) OX=9606 GN=MTM1 PE=1 SV=2	MTM1	1.30442	0.255008	No	0.221182	No	0.958391
Q9NYY8;Q9NYY8-2	>sp|Q9NYY8|FAKD2_HUMAN FAST kinase domain-containing protein 2, mitochondrial OS=Homo sapiens (Human) OX=9606 GN=FASTKD2 PE=1 SV=1;>sp|Q9NYY8-2|FAKD2-2_HUMAN Isoform of Q9NYY8, Isoform 2 of FAST kinase domain-containing protein 2, mitochondrial OS=Homo sapiens (Human) OX=9606 GN=FASTKD2 PE=1 SV=1	FASTKD2	0.718112	0.255291	No	0.221217	No	-0.95781
A0A087WYT3;Q15185;Q15185-4	>tr|A0A087WYT3|A0A087WYT3_HUMAN Isoform of Q15185, CS domain-containing protein OS=Homo sapiens (Human) OX=9606 GN=PTGES3 PE=1 SV=1;>sp|Q15185|TEBP_HUMAN Prostaglandin E synthase 3 OS=Homo sapiens (Human) OX=9606 GN=PTGES3 PE=1 SV=1;>sp|Q15185-4|TEBP-4_HUMAN Isoform of Q15185, Isoform 4 of Prostaglandin E synthase 3 OS=Homo sapiens (Human) OX=9606 GN=PTGES3 PE=1 SV=1	PTGES3	1.32643	0.255421	No	0.221217	No	0.957544
E7ERW8;E9PEZ3;E9PHQ0;H9KV28;O60610;O60610-2;O60610	NA	DIAPH1	0.812902	0.255876	No	0.221312	No	-0.956652
Q9UHJ6	>sp|Q9UHJ6|SHPK_HUMAN Sedoheptulokinase OS=Homo sapiens (Human) OX=9606 GN=SHPK PE=1 SV=3	SHPK	1.58938	0.255903	No	0.221312	No	0.956587
P60228	>sp|P60228|EIF3E_HUMAN Eukaryotic translation initiation factor 3 subunit E OS=Homo sapiens (Human) OX=9606 GN=EIF3E PE=1 SV=1	EIF3E	0.812827	0.256586	No	0.221419	No	-0.955162
H3BPE1;H3BQK9	>tr|H3BPE1|H3BPE1_HUMAN Isoform of Q9UPN3, Microtubule-actin cross-linking factor 1, isoforms 1/2/3/5 OS=Homo sapiens (Human) OX=9606 GN=MACF1 PE=1 SV=1;>tr|H3BQK9|H3BQK9_HUMAN Isoform of Q9UPN3, Microtubule-actin cross-linking factor 1, isoforms 1/2/3/5 OS=Homo sapiens (Human) OX=9606 GN=MACF1 PE=1 SV=1	MACF1	1.12386	0.25658	No	0.221419	No	0.955175
P78527	>sp|P78527|PRKDC_HUMAN DNA-dependent protein kinase catalytic subunit OS=Homo sapiens (Human) OX=9606 GN=PRKDC PE=1 SV=3	PRKDC	1.20591	0.256273	No	0.221419	No	0.955818
P98160	>sp|P98160|PGBM_HUMAN Basement membrane-specific heparan sulfate proteoglycan core protein OS=Homo sapiens (Human) OX=9606 GN=HSPG2 PE=1 SV=4	HSPG2	1.43969	0.256965	No	0.221585	No	0.954345
Q13636	>sp|Q13636|RAB31_HUMAN Ras-related protein Rab-31 OS=Homo sapiens (Human) OX=9606 GN=RAB31 PE=1 SV=1	RAB31	1.20825	0.257956	No	0.222233	No	0.952291
Q9UJD0	>sp|Q9UJD0|RIMS3_HUMAN Regulating synaptic membrane exocytosis protein 3 OS=Homo sapiens (Human) OX=9606 GN=RIMS3 PE=1 SV=1	RIMS3	0.719135	0.258091	No	0.222233	No	-0.952005
Q9Y6V0;Q9Y6V0-2;Q9Y6V0-5;Q9Y6V0-6	>sp|Q9Y6V0|PCLO_HUMAN Protein piccolo OS=Homo sapiens (Human) OX=9606 GN=PCLO PE=1 SV=5;>sp|Q9Y6V0-2|PCLO_HUMAN Isoform 2 of Protein piccolo OS=Homo sapiens GN=PCLO;>sp|Q9Y6V0-5|PCLO_HUMAN Isoform 5 of Protein piccolo OS=Homo sapiens GN=PCLO;>sp|Q9Y6V0-6|PCLO-6_HUMAN Isoform of Q9Y6V0, Isoform 6 of Protein piccolo OS=Homo sapiens (Human) OX=9606 GN=PCLO PE=1 SV=5	PCLO	0.840901	0.258496	No	0.22242	No	-0.951151
Q86WG3;Q86WG3-3	>sp|Q86WG3|ATCAY_HUMAN Caytaxin OS=Homo sapiens (Human) OX=9606 GN=ATCAY PE=1 SV=2;>sp|Q86WG3-3|ATCAY-3_HUMAN Isoform of Q86WG3, Isoform 2 of Caytaxin OS=Homo sapiens (Human) OX=9606 GN=ATCAY PE=1 SV=2	ATCAY	1.69557	0.261268	No	0.224479	No	0.945471
Q96CS3	>sp|Q96CS3|FAF2_HUMAN FAS-associated factor 2 OS=Homo sapiens (Human) OX=9606 GN=FAF2 PE=1 SV=2	FAF2	0.846724	0.261624	No	0.224479	No	-0.944762
P49441	>sp|P49441|INPP_HUMAN Inositol polyphosphate 1-phosphatase OS=Homo sapiens (Human) OX=9606 GN=INPP1 PE=1 SV=1	INPP1	1.21756	0.261644	No	0.224479	No	0.944716
A0A0A0MS41	>tr|A0A0A0MS41|A0A0A0MS41_HUMAN Sideroflexin-3 OS=Homo sapiens GN=SFXN3 PE=4 SV=1	SFXN3	1.09796	0.261297	No	0.224479	No	0.945413
A0A0A0MRJ6;F6S8N6;H7BY58;P22061;P22061-2	>tr|A0A0A0MRJ6|A0A0A0MRJ6_HUMAN Isoform of P22061, Protein-L-isoaspartate O-methyltransferase OS=Homo sapiens (Human) OX=9606 GN=PCMT1 PE=1 SV=1;>tr|F6S8N6|F6S8N6_HUMAN Isoform of P22061, Protein-L-isoaspartate(D-aspartate) O-methyltransferase OS=Homo sapiens (Human) OX=9606 GN=PCMT1 PE=1 SV=1;>tr|H7BY58|H7BY58_HUMAN Isoform of P22061, Protein-L-isoaspartate O-methyltransferase OS=Homo sapiens (H…	PCMT1	1.21212	0.262083	No	0.224693	No	0.94385
E7EM64;Q7L5N1	>tr|E7EM64|E7EM64_HUMAN Isoform of Q7L5N1, MPN domain-containing protein OS=Homo sapiens (Human) OX=9606 GN=COPS6 PE=1 SV=1;>sp|Q7L5N1|CSN6_HUMAN COP9 signalosome complex subunit 6 OS=Homo sapiens (Human) OX=9606 GN=COPS6 PE=1 SV=1	COPS6	0.909689	0.26313	No	0.225194	No	-0.941694
P31689	>sp|P31689|DNJA1_HUMAN DnaJ homolog subfamily A member 1 OS=Homo sapiens (Human) OX=9606 GN=DNAJA1 PE=1 SV=2	DNAJA1	0.859182	0.263426	No	0.225194	No	-0.941068
A0A087WYG6;A0A087WZS0;Q9BZG9-2	>tr|A0A087WYG6|A0A087WYG6_HUMAN Isoform of P0DP58, Ly-6/neurotoxin-like protein 1 (Fragment) OS=Homo sapiens (Human) OX=9606 GN=LYNX1 PE=1 SV=1;>tr|A0A087WZS0|A0A087WZS0_HUMAN Isoform of P0DP58, Ly-6/neurotoxin-like protein 1 (Fragment) OS=Homo sapiens (Human) OX=9606 GN=LYNX1 PE=1 SV=1;>sp|Q9BZG9-2|LYNX1_HUMAN Isoform 2 of Ly-6/neurotoxin-like protein 1 OS=Homo sapiens GN=LYNX1	LYNX1	1.99617	0.263416	No	0.225194	No	0.941084
Q9NQC3	>sp|Q9NQC3|RTN4_HUMAN Reticulon-4 OS=Homo sapiens (Human) OX=9606 GN=RTN4 PE=1 SV=2	RTN4	0.882324	0.263225	No	0.225194	No	-0.941502
A0A0A6YYH3;A6NJA2;P54578;P54578-2;P54578-3	>tr|A0A0A6YYH3|A0A0A6YYH3_HUMAN Ubiquitin carboxyl-terminal hydrolase 14 OS=Homo sapiens GN=USP14 PE=4 SV=1;>tr|A6NJA2|A6NJA2_HUMAN Isoform of P54578, Ubiquitin carboxyl-terminal hydrolase OS=Homo sapiens (Human) OX=9606 GN=USP14 PE=1 SV=2;>sp|P54578|UBP14_HUMAN Ubiquitin carboxyl-terminal hydrolase 14 OS=Homo sapiens (Human) OX=9606 GN=USP14 PE=1 SV=3;>sp|P54578-2|UBP14-2_HUMAN Isoform of P54578…	USP14	0.884189	0.264584	No	0.226021	No	-0.938729
Q13509	>sp|Q13509|TBB3_HUMAN Tubulin beta-3 chain OS=Homo sapiens (Human) OX=9606 GN=TUBB3 PE=1 SV=2	TUBB3	0.885859	0.265369	No	0.226529	No	-0.937188
P42658-2	>sp|P42658-2|DPP6-2_HUMAN Isoform of P42658, Isoform DPPX-S of Dipeptidyl aminopeptidase-like protein 6 OS=Homo sapiens (Human) OX=9606 GN=DPP6 PE=1 SV=2	DPP6	0.898709	0.266031	No	0.226605	No	-0.935859
Q9H598	>sp|Q9H598|VIAAT_HUMAN Vesicular inhibitory amino acid transporter OS=Homo sapiens (Human) OX=9606 GN=SLC32A1 PE=2 SV=2	SLC32A1	0.778557	0.265926	No	0.226605	No	-0.936057
O00186	>sp|O00186|STXB3_HUMAN Syntaxin-binding protein 3 OS=Homo sapiens (Human) OX=9606 GN=STXBP3 PE=1 SV=2	STXBP3	1.19197	0.265912	No	0.226605	No	0.936082
P55957;P55957-2	>sp|P55957|BID_HUMAN BH3-interacting domain death agonist OS=Homo sapiens (Human) OX=9606 GN=BID PE=1 SV=1;>sp|P55957-2|BID-2_HUMAN Isoform of P55957, Isoform 2 of BH3-interacting domain death agonist OS=Homo sapiens (Human) OX=9606 GN=BID PE=1 SV=1	BID	0.775509	0.26664	No	0.226961	No	-0.934682
O60282	>sp|O60282|KIF5C_HUMAN Kinesin heavy chain isoform 5C OS=Homo sapiens (Human) OX=9606 GN=KIF5C PE=1 SV=1	KIF5C	0.892942	0.267324	No	0.22738	No	-0.933341
Q6ZSS7	>sp|Q6ZSS7|MFSD6_HUMAN Major facilitator superfamily domain-containing protein 6 OS=Homo sapiens (Human) OX=9606 GN=MFSD6 PE=1 SV=2	MFSD6	1.23404	0.26784	No	0.227494	No	0.93232
Q15746;Q15746-11;Q15746-2;Q15746-3;Q15746-4;Q15746	NA	MYLK	0.862315	0.267835	No	0.227494	No	-0.932327
B4DK72;Q01064;Q01064-2	>tr|B4DK72|B4DK72_HUMAN Isoform of Q01064, Phosphodiesterase OS=Homo sapiens (Human) OX=9606 GN=PDE1B PE=1 SV=1;>sp|Q01064|PDE1B_HUMAN Calcium/calmodulin-dependent 3',5'-cyclic nucleotide phosphodiesterase 1B OS=Homo sapiens (Human) OX=9606 GN=PDE1B PE=1 SV=2;>sp|Q01064-2|PDE1B-2_HUMAN Isoform of Q01064, Isoform PDE1B2 of Calcium/calmodulin-dependent 3',5'-cyclic nucleotide phosphodiesterase 1B O…	PDE1B	0.890992	0.26835	No	0.227763	No	-0.931311
P23246	>sp|P23246|SFPQ_HUMAN Splicing factor, proline- and glutamine-rich OS=Homo sapiens (Human) OX=9606 GN=SFPQ PE=1 SV=2	SFPQ	0.869412	0.269516	No	0.22859	No	-0.929068
Q9Y570;Q9Y570-4	>sp|Q9Y570|PPME1_HUMAN Protein phosphatase methylesterase 1 OS=Homo sapiens (Human) OX=9606 GN=PPME1 PE=1 SV=3;>sp|Q9Y570-4|PPME1-4_HUMAN Isoform of Q9Y570, Isoform 4 of Protein phosphatase methylesterase 1 OS=Homo sapiens (Human) OX=9606 GN=PPME1 PE=1 SV=3	PPME1	0.866358	0.27023	No	0.229032	No	-0.927677
P31948	>sp|P31948|STIP1_HUMAN Stress-induced-phosphoprotein 1 OS=Homo sapiens (Human) OX=9606 GN=STIP1 PE=1 SV=1	STIP1	0.822691	0.270674	No	0.229244	No	-0.926769
P62280	>sp|P62280|RS11_HUMAN 40S ribosomal protein S11 OS=Homo sapiens (Human) OX=9606 GN=RPS11 PE=1 SV=3	RPS11	1.22076	0.271676	No	0.229929	No	0.924734
A0A087WZP6;A0A0A0MTL9;Q14112;Q14112-2	>tr|A0A087WZP6|A0A087WZP6_HUMAN Isoform of Q14112, Nidogen-2 OS=Homo sapiens (Human) OX=9606 GN=NID2 PE=1 SV=1;>tr|A0A0A0MTL9|A0A0A0MTL9_HUMAN Nidogen-2 OS=Homo sapiens GN=NID2 PE=4 SV=1;>sp|Q14112|NID2_HUMAN Nidogen-2 OS=Homo sapiens (Human) OX=9606 GN=NID2 PE=1 SV=3;>sp|Q14112-2|NID2-2_HUMAN Isoform of Q14112, Isoform 2 of Nidogen-2 OS=Homo sapiens (Human) OX=9606 GN=NID2 PE=1 SV=3	NID2	1.25496	0.272143	No	0.23016	No	0.923844
Q7L7X3;Q7L7X3-3	>sp|Q7L7X3|TAOK1_HUMAN Serine/threonine-protein kinase TAO1 OS=Homo sapiens (Human) OX=9606 GN=TAOK1 PE=1 SV=1;>sp|Q7L7X3-3|TAOK1-3_HUMAN Isoform of Q7L7X3, Isoform 3 of Serine/threonine-protein kinase TAO1 OS=Homo sapiens (Human) OX=9606 GN=TAOK1 PE=1 SV=1	TAOK1	0.603056	0.273543	No	0.23118	No	-0.92112
P16870;P16870-2	>sp|P16870|CBPE_HUMAN Carboxypeptidase E OS=Homo sapiens (Human) OX=9606 GN=CPE PE=1 SV=1;>sp|P16870-2|CBPE-2_HUMAN Isoform of P16870, Isoform 2 of Carboxypeptidase E OS=Homo sapiens (Human) OX=9606 GN=CPE PE=1 SV=1	CPE	1.19061	0.274341	No	0.231689	No	0.919514
Q14894	>sp|Q14894|CRYM_HUMAN Ketimine reductase mu-crystallin OS=Homo sapiens (Human) OX=9606 GN=CRYM PE=1 SV=1	CRYM	0.869458	0.274966	No	0.232043	No	-0.918293
P61225	>sp|P61225|RAP2B_HUMAN Ras-related protein Rap-2b OS=Homo sapiens (Human) OX=9606 GN=RAP2B PE=1 SV=1	RAP2B	1.0924	0.275151	No	0.232043	No	0.917905
E9PFH4;Q9Y5L0;Q9Y5L0-3	>tr|E9PFH4|E9PFH4_HUMAN Isoform of Q9Y5L0, Xpo1 domain-containing protein OS=Homo sapiens (Human) OX=9606 GN=TNPO3 PE=1 SV=1;>sp|Q9Y5L0|TNPO3_HUMAN Transportin-3 OS=Homo sapiens (Human) OX=9606 GN=TNPO3 PE=1 SV=3;>sp|Q9Y5L0-3|TNPO3-3_HUMAN Isoform of Q9Y5L0, Isoform 3 of Transportin-3 OS=Homo sapiens (Human) OX=9606 GN=TNPO3 PE=1 SV=3	TNPO3	0.826326	0.275792	No	0.232419	No	-0.916636
Q9H0U4	>sp|Q9H0U4|RAB1B_HUMAN Ras-related protein Rab-1B OS=Homo sapiens (Human) OX=9606 GN=RAB1B PE=1 SV=1	RAB1B	1.09707	0.277583	No	0.233762	No	0.913213
J3KPS3;P04075	>tr|J3KPS3|J3KPS3_HUMAN Isoform of P04075, Fructose-bisphosphate aldolase OS=Homo sapiens (Human) OX=9606 GN=ALDOA PE=1 SV=1;>sp|P04075|ALDOA_HUMAN Fructose-bisphosphate aldolase A OS=Homo sapiens (Human) OX=9606 GN=ALDOA PE=1 SV=2	ALDOA	0.837521	0.277783	No	0.233765	No	-0.912871
Q13085;Q13085-2;Q13085-3;Q13085-4	>sp|Q13085|ACACA_HUMAN Acetyl-CoA carboxylase 1 OS=Homo sapiens (Human) OX=9606 GN=ACACA PE=1 SV=2;>sp|Q13085-2|ACACA-2_HUMAN Isoform of Q13085, Isoform 2 of Acetyl-CoA carboxylase 1 OS=Homo sapiens (Human) OX=9606 GN=ACACA PE=1 SV=2;>sp|Q13085-3|ACACA-3_HUMAN Isoform of Q13085, Isoform 3 of Acetyl-CoA carboxylase 1 OS=Homo sapiens (Human) OX=9606 GN=ACACA PE=1 SV=2;>sp|Q13085-4|ACACA-4_HUMAN Iso…	ACACA	0.845698	0.279754	No	0.23509	No	-0.908935
Q9UFN0	>sp|Q9UFN0|NPS3A_HUMAN Protein NipSnap homolog 3A OS=Homo sapiens (Human) OX=9606 GN=NIPSNAP3A PE=1 SV=2	NIPSNAP3A	0.862268	0.279609	No	0.23509	No	-0.909212
Q7Z7H5;Q7Z7H5-2;Q7Z7H5-3	>sp|Q7Z7H5|TMED4_HUMAN Transmembrane emp24 domain-containing protein 4 OS=Homo sapiens (Human) OX=9606 GN=TMED4 PE=1 SV=1;>sp|Q7Z7H5-2|TMED4-2_HUMAN Isoform of Q7Z7H5, Isoform 2 of Transmembrane emp24 domain-containing protein 4 OS=Homo sapiens (Human) OX=9606 GN=TMED4 PE=1 SV=1;>sp|Q7Z7H5-3|TMED4-3_HUMAN Isoform of Q7Z7H5, Isoform 3 of Transmembrane emp24 domain-containing protein 4 OS=Homo sapi…	TMED4	0.786961	0.280475	No	0.23553	No	-0.907587
P14868	>sp|P14868|SYDC_HUMAN Aspartate--tRNA ligase, cytoplasmic OS=Homo sapiens (Human) OX=9606 GN=DARS PE=1 SV=2	DARS	1.10781	0.280765	No	0.235607	No	0.907037
A0A087X0M8;O00533;O00533-2	>tr|A0A087X0M8|A0A087X0M8_HUMAN Isoform of O00533, Neural cell adhesion molecule L1-like protein OS=Homo sapiens (Human) OX=9606 GN=CHL1 PE=1 SV=1;>sp|O00533|NCHL1_HUMAN Neural cell adhesion molecule L1-like protein OS=Homo sapiens (Human) OX=9606 GN=CHL1 PE=1 SV=4;>sp|O00533-2|NCHL1-2_HUMAN Isoform of O00533, Isoform 2 of Neural cell adhesion molecule L1-like protein OS=Homo sapiens (Human) OX=9…	CHL1	1.13644	0.280988	No	0.235614	No	0.906617
O75306;O75306-2	>sp|O75306|NDUS2_HUMAN NADH dehydrogenase [ubiquinone] iron-sulfur protein 2, mitochondrial OS=Homo sapiens (Human) OX=9606 GN=NDUFS2 PE=1 SV=2;>sp|O75306-2|NDUS2-2_HUMAN Isoform of O75306, Isoform 2 of NADH dehydrogenase [ubiquinone] iron-sulfur protein 2, mitochondrial OS=Homo sapiens (Human) OX=9606 GN=NDUFS2 PE=1 SV=2	NDUFS2	0.775227	0.281171	No	0.235614	No	-0.906261
P62330	>sp|P62330|ARF6_HUMAN ADP-ribosylation factor 6 OS=Homo sapiens (Human) OX=9606 GN=ARF6 PE=1 SV=2	ARF6	1.11188	0.281876	No	0.23574	No	0.904844
Q15006	>sp|Q15006|EMC2_HUMAN ER membrane protein complex subunit 2 OS=Homo sapiens (Human) OX=9606 GN=EMC2 PE=1 SV=1	EMC2	0.821326	0.281983	No	0.23574	No	-0.904631
P05771-2	>sp|P05771-2|KPCB-2_HUMAN Isoform of P05771, Isoform Beta-II of Protein kinase C beta type OS=Homo sapiens (Human) OX=9606 GN=PRKCB PE=1 SV=4	PRKCB	1.08882	0.282115	No	0.23574	No	0.904391
P52888	>sp|P52888|THOP1_HUMAN Thimet oligopeptidase OS=Homo sapiens (Human) OX=9606 GN=THOP1 PE=1 SV=2	THOP1	1.28792	0.281665	No	0.23574	No	0.905248
P62820	>sp|P62820|RAB1A_HUMAN Ras-related protein Rab-1A OS=Homo sapiens (Human) OX=9606 GN=RAB1A PE=1 SV=3	RAB1A	0.842072	0.28281	No	0.236154	No	-0.90306
P02647	>sp|P02647|APOA1_HUMAN Apolipoprotein A-I OS=Homo sapiens (Human) OX=9606 GN=APOA1 PE=1 SV=1	APOA1	0.744614	0.283282	No	0.236182	No	-0.902168
Q9NVJ2	>sp|Q9NVJ2|ARL8B_HUMAN ADP-ribosylation factor-like protein 8B OS=Homo sapiens (Human) OX=9606 GN=ARL8B PE=1 SV=1	ARL8B	1.10016	0.283488	No	0.236182	No	0.901785
P49593	>sp|P49593|PPM1F_HUMAN Protein phosphatase 1F OS=Homo sapiens (Human) OX=9606 GN=PPM1F PE=1 SV=3	PPM1F	0.873752	0.283322	No	0.236182	No	-0.902097
P28074	>sp|P28074|PSB5_HUMAN Proteasome subunit beta type-5 OS=Homo sapiens (Human) OX=9606 GN=PSMB5 PE=1 SV=3	PSMB5	1.12873	0.283639	No	0.236182	No	0.901495
P51571	>sp|P51571|SSRD_HUMAN Translocon-associated protein subunit delta OS=Homo sapiens (Human) OX=9606 GN=SSR4 PE=1 SV=1	SSR4	1.18225	0.284546	No	0.236771	No	0.899767
P53990;P53990-2;P53990-4;P53990-5	>sp|P53990|IST1_HUMAN IST1 homolog OS=Homo sapiens (Human) OX=9606 GN=IST1 PE=1 SV=1;>sp|P53990-2|IST1-2_HUMAN Isoform of P53990, Isoform 2 of IST1 homolog OS=Homo sapiens (Human) OX=9606 GN=IST1 PE=1 SV=1;>sp|P53990-4|IST1-4_HUMAN Isoform of P53990, Isoform 4 of IST1 homolog OS=Homo sapiens (Human) OX=9606 GN=IST1 PE=1 SV=1;>sp|P53990-5|IST1-5_HUMAN Isoform of P53990, Isoform 5 of IST1 homolog O…	IST1	0.785272	0.28549	No	0.23739	No	-0.898055
Q7L0J3	>sp|Q7L0J3|SV2A_HUMAN Synaptic vesicle glycoprotein 2A OS=Homo sapiens (Human) OX=9606 GN=SV2A PE=1 SV=1	SV2A	1.12846	0.285832	No	0.237508	No	0.897367
A0A087WTT1;P11940;P11940-2	>tr|A0A087WTT1|A0A087WTT1_HUMAN Isoform of P11940, Polyadenylate-binding protein OS=Homo sapiens (Human) OX=9606 GN=PABPC1 PE=1 SV=1;>sp|P11940|PABP1_HUMAN Polyadenylate-binding protein 1 OS=Homo sapiens (Human) OX=9606 GN=PABPC1 PE=1 SV=2;>sp|P11940-2|PABP1-2_HUMAN Isoform of P11940, Isoform 2 of Polyadenylate-binding protein 1 OS=Homo sapiens (Human) OX=9606 GN=PABPC1 PE=1 SV=2	PABPC1	0.872593	0.286189	No	0.237639	No	-0.896654
Q9NRG7-2	>sp|Q9NRG7-2|D39U1_HUMAN Isoform 2 of Epimerase family protein SDR39U1 OS=Homo sapiens GN=SDR39U1	SDR39U1	0.853583	0.28708	No	0.238212	No	-0.894936
Q9Y2T2	>sp|Q9Y2T2|AP3M1_HUMAN AP-3 complex subunit mu-1 OS=Homo sapiens (Human) OX=9606 GN=AP3M1 PE=1 SV=1	AP3M1	0.661858	0.287995	No	0.23871	No	-0.893177
Q9BR01;Q9BR01-2	>sp|Q9BR01|ST4A1_HUMAN Sulfotransferase 4A1 OS=Homo sapiens (Human) OX=9606 GN=SULT4A1 PE=1 SV=2;>sp|Q9BR01-2|ST4A1-2_HUMAN Isoform of Q9BR01, Isoform 2 of Sulfotransferase 4A1 OS=Homo sapiens (Human) OX=9606 GN=SULT4A1 PE=1 SV=2	SULT4A1	1.23313	0.288083	No	0.23871	No	0.893019
Q15365	>sp|Q15365|PCBP1_HUMAN Poly(rC)-binding protein 1 OS=Homo sapiens (Human) OX=9606 GN=PCBP1 PE=1 SV=2	PCBP1	1.14401	0.289642	No	0.239668	No	0.890183
Q00059	>sp|Q00059|TFAM_HUMAN Transcription factor A, mitochondrial OS=Homo sapiens (Human) OX=9606 GN=TFAM PE=1 SV=1	TFAM	0.8925	0.289455	No	0.239668	No	-0.890505
E9PIM6;E9PNQ8;P04216	>tr|E9PIM6|E9PIM6_HUMAN Isoform of P04216, Ig-like domain-containing protein (Fragment) OS=Homo sapiens (Human) OX=9606 GN=THY1 PE=1 SV=8;>tr|E9PNQ8|E9PNQ8_HUMAN Isoform of P04216, Ig-like domain-containing protein (Fragment) OS=Homo sapiens (Human) OX=9606 GN=THY1 PE=1 SV=1;>sp|P04216|THY1_HUMAN Thy-1 membrane glycoprotein OS=Homo sapiens (Human) OX=9606 GN=THY1 PE=1 SV=2	THY1	0.855182	0.290454	No	0.240172	No	-0.888685
O95989	>sp|O95989|NUDT3_HUMAN Diphosphoinositol polyphosphate phosphohydrolase 1 OS=Homo sapiens (Human) OX=9606 GN=NUDT3 PE=1 SV=1	NUDT3	1.13088	0.290659	No	0.240174	No	0.888322
P22033	>sp|P22033|MUTA_HUMAN Methylmalonyl-CoA mutase, mitochondrial OS=Homo sapiens (Human) OX=9606 GN=MMUT PE=1 SV=4	MMUT	1.21274	0.291429	No	0.240644	No	0.886848
P11166	>sp|P11166|GTR1_HUMAN Solute carrier family 2, facilitated glucose transporter member 1 OS=Homo sapiens (Human) OX=9606 GN=SLC2A1 PE=1 SV=2	SLC2A1	1.20097	0.292028	No	0.240971	No	0.885697
P00387;P00387-2;P00387-3	>sp|P00387|NB5R3_HUMAN NADH-cytochrome b5 reductase 3 OS=Homo sapiens (Human) OX=9606 GN=CYB5R3 PE=1 SV=3;>sp|P00387-2|NB5R3-2_HUMAN Isoform of P00387, Isoform 2 of NADH-cytochrome b5 reductase 3 OS=Homo sapiens (Human) OX=9606 GN=CYB5R3 PE=1 SV=3;>sp|P00387-3|NB5R3-3_HUMAN Isoform of P00387, Isoform 3 of NADH-cytochrome b5 reductase 3 OS=Homo sapiens (Human) OX=9606 GN=CYB5R3 PE=1 SV=3	CYB5R3	1.12926	0.292355	No	0.241073	No	0.88508
Q16643;Q16643-3	>sp|Q16643|DREB_HUMAN Drebrin OS=Homo sapiens (Human) OX=9606 GN=DBN1 PE=1 SV=4;>sp|Q16643-3|DREB-3_HUMAN Isoform of Q16643, Isoform 3 of Drebrin OS=Homo sapiens (Human) OX=9606 GN=DBN1 PE=1 SV=4	DBN1	0.88684	0.292786	No	0.241121	No	-0.884298
B1AVU8;C9JIZ6;P07602;P07602-2;P07602-3	>tr|B1AVU8|B1AVU8_HUMAN Saposin-D OS=Homo sapiens GN=PSAP PE=1 SV=1;>tr|C9JIZ6|C9JIZ6_HUMAN Isoform of P07602, Prosaposin OS=Homo sapiens (Human) OX=9606 GN=PSAP PE=1 SV=2;>sp|P07602|SAP_HUMAN Prosaposin OS=Homo sapiens (Human) OX=9606 GN=PSAP PE=1 SV=2;>sp|P07602-2|SAP-2_HUMAN Isoform of P07602, Isoform Sap-mu-6 of Prosaposin OS=Homo sapiens (Human) OX=9606 GN=PSAP PE=1 SV=2;>sp|P07602-3|SAP-3_H…	PSAP	1.38061	0.29282	No	0.241121	No	0.884225
O15031	>sp|O15031|PLXB2_HUMAN Plexin-B2 OS=Homo sapiens (Human) OX=9606 GN=PLXNB2 PE=1 SV=3	PLXNB2	1.35887	0.293512	No	0.241523	No	0.882931
Q96N66	>sp|Q96N66|MBOA7_HUMAN Lysophospholipid acyltransferase 7 OS=Homo sapiens (Human) OX=9606 GN=MBOAT7 PE=1 SV=2	MBOAT7	1.3606	0.295095	No	0.242658	No	0.879933
O95573	>sp|O95573|ACSL3_HUMAN Long-chain-fatty-acid--CoA ligase 3 OS=Homo sapiens (Human) OX=9606 GN=ACSL3 PE=1 SV=3	ACSL3	0.845371	0.295347	No	0.242698	No	-0.879453
Q9NRN7	>sp|Q9NRN7|ADPPT_HUMAN L-aminoadipate-semialdehyde dehydrogenase-phosphopantetheinyl transferase OS=Homo sapiens (Human) OX=9606 GN=AASDHPPT PE=1 SV=2	AASDHPPT	0.848712	0.29597	No	0.243041	No	-0.878283
H0YGG4;Q14232;Q14232-2	>tr|H0YGG4|H0YGG4_HUMAN Isoform of Q14232, Translation initiation factor eIF-2B subunit alpha (Fragment) OS=Homo sapiens (Human) OX=9606 GN=EIF2B1 PE=1 SV=1;>sp|Q14232|EI2BA_HUMAN Translation initiation factor eIF-2B subunit alpha OS=Homo sapiens (Human) OX=9606 GN=EIF2B1 PE=1 SV=1;>sp|Q14232-2|EI2BA-2_HUMAN Isoform of Q14232, Isoform 2 of Translation initiation factor eIF-2B subunit alpha OS=Hom…	EIF2B1	1.55318	0.296464	No	0.243278	No	0.877353
O95373	>sp|O95373|IPO7_HUMAN Importin-7 OS=Homo sapiens (Human) OX=9606 GN=IPO7 PE=1 SV=1	IPO7	0.914755	0.2973	No	0.243796	No	-0.875748
O43427;O43427-2	>sp|O43427|FIBP_HUMAN Acidic fibroblast growth factor intracellular-binding protein OS=Homo sapiens (Human) OX=9606 GN=FIBP PE=1 SV=3;>sp|O43427-2|FIBP-2_HUMAN Isoform of O43427, Isoform Short of Acidic fibroblast growth factor intracellular-binding protein OS=Homo sapiens (Human) OX=9606 GN=FIBP PE=1 SV=3	FIBP	0.866715	0.297845	No	0.243829	No	-0.87476
Q2TAP0	>sp|Q2TAP0|GOG7B_HUMAN Golgin subfamily A member 7B OS=Homo sapiens (Human) OX=9606 GN=GOLGA7B PE=2 SV=2	GOLGA7B	0.884856	0.297864	No	0.243829	No	-0.874731
Q8NBX0	>sp|Q8NBX0|SCPDL_HUMAN Saccharopine dehydrogenase-like oxidoreductase OS=Homo sapiens (Human) OX=9606 GN=SCCPDH PE=1 SV=1	SCCPDH	0.888594	0.297956	No	0.243829	No	-0.874552
A0A0A0MSW4;P48739;P48739-2;P48739-3	>tr|A0A0A0MSW4|A0A0A0MSW4_HUMAN Isoform of P48739, Phosphatidylinositol transfer protein beta isoform OS=Homo sapiens (Human) OX=9606 GN=PITPNB PE=1 SV=1;>sp|P48739|PIPNB_HUMAN Phosphatidylinositol transfer protein beta isoform OS=Homo sapiens (Human) OX=9606 GN=PITPNB PE=1 SV=2;>sp|P48739-2|PIPNB-2_HUMAN Isoform of P48739, Isoform 2 of Phosphatidylinositol transfer protein beta isoform OS=Homo s…	PITPNB	1.21561	0.298225	No	0.243881	No	0.874058
A0A087WUV8;P35613;P35613-2;P35613-3;P35613-4	>tr|A0A087WUV8|A0A087WUV8_HUMAN Isoform of P35613, Ig-like domain-containing protein OS=Homo sapiens (Human) OX=9606 GN=BSG PE=1 SV=1;>sp|P35613|BASI_HUMAN Basigin OS=Homo sapiens (Human) OX=9606 GN=BSG PE=1 SV=2;>sp|P35613-2|BASI-2_HUMAN Isoform of P35613, Isoform 2 of Basigin OS=Homo sapiens (Human) OX=9606 GN=BSG PE=1 SV=2;>sp|P35613-3|BASI-3_HUMAN Isoform of P35613, Isoform 3 of Basigin OS=Ho…	BSG	1.11292	0.298601	No	0.24402	No	0.873399
C9JZR2;O60716;O60716-10;O60716-11;O60716-13;O60716	NA	CTNND1	1.13978	0.299924	No	0.244933	No	0.870918
A0A087WY71;E9PFW3;Q96CW1;Q96CW1-2	>tr|A0A087WY71|A0A087WY71_HUMAN Isoform of Q96CW1, AP-2 complex subunit mu OS=Homo sapiens (Human) OX=9606 GN=AP2M1 PE=1 SV=1;>tr|E9PFW3|E9PFW3_HUMAN Isoform of Q96CW1, AP-2 complex subunit mu OS=Homo sapiens (Human) OX=9606 GN=AP2M1 PE=1 SV=1;>sp|Q96CW1|AP2M1_HUMAN AP-2 complex subunit mu OS=Homo sapiens (Human) OX=9606 GN=AP2M1 PE=1 SV=2;>sp|Q96CW1-2|AP2M1-2_HUMAN Isoform of Q96CW1, Isoform 2 o…	AP2M1	0.892961	0.30376	No	0.247895	No	-0.863824
Q9BXW6	>sp|Q9BXW6|OSBL1_HUMAN Oxysterol-binding protein-related protein 1 OS=Homo sapiens (Human) OX=9606 GN=OSBPL1A PE=1 SV=2	OSBPL1A	0.911374	0.304535	No	0.248357	No	-0.862414
E7EMS6;P21964;P21964-2	>tr|E7EMS6|E7EMS6_HUMAN Isoform of P21964, Catechol O-methyltransferase (Fragment) OS=Homo sapiens (Human) OX=9606 GN=COMT PE=1 SV=1;>sp|P21964|COMT_HUMAN Catechol O-methyltransferase OS=Homo sapiens (Human) OX=9606 GN=COMT PE=1 SV=2;>sp|P21964-2|COMT-2_HUMAN Isoform of P21964, Isoform Soluble of Catechol O-methyltransferase OS=Homo sapiens (Human) OX=9606 GN=COMT PE=1 SV=2	COMT	1.81823	0.305809	No	0.249225	No	0.86004
A0A087WUY5;Q5QPE5;Q9Y5X3	>tr|A0A087WUY5|A0A087WUY5_HUMAN Isoform of Q9Y5X3, Vps5 domain-containing protein (Fragment) OS=Homo sapiens (Human) OX=9606 GN=SNX5 PE=1 SV=1;>tr|Q5QPE5|Q5QPE5_HUMAN Isoform of Q9Y5X3, Sorting nexin-5 (Fragment) OS=Homo sapiens (Human) OX=9606 GN=SNX5 PE=1 SV=1;>sp|Q9Y5X3|SNX5_HUMAN Sorting nexin-5 OS=Homo sapiens (Human) OX=9606 GN=SNX5 PE=1 SV=1	SNX5	0.892158	0.30645	No	0.249576	No	-0.858894
O00764	>sp|O00764|PDXK_HUMAN Pyridoxal kinase OS=Homo sapiens (Human) OX=9606 GN=PDXK PE=1 SV=1	PDXK	1.15404	0.30785	No	0.250544	No	0.856382
Q92747	>sp|Q92747|ARC1A_HUMAN Actin-related protein 2/3 complex subunit 1A OS=Homo sapiens (Human) OX=9606 GN=ARPC1A PE=2 SV=2	ARPC1A	0.886195	0.308793	No	0.250747	No	-0.854713
P40227	>sp|P40227|TCPZ_HUMAN T-complex protein 1 subunit zeta OS=Homo sapiens (Human) OX=9606 GN=CCT6A PE=1 SV=3	CCT6A	0.897711	0.308944	No	0.250747	No	-0.854431
Q9Y2Q3	>sp|Q9Y2Q3|GSTK1_HUMAN Glutathione S-transferase kappa 1 OS=Homo sapiens (Human) OX=9606 GN=GSTK1 PE=1 SV=3	GSTK1	0.889083	0.30886	No	0.250747	No	-0.854577
Q14764	>sp|Q14764|MVP_HUMAN Major vault protein OS=Homo sapiens (Human) OX=9606 GN=MVP PE=1 SV=4	MVP	0.808892	0.308393	No	0.250747	No	-0.855435
F5GXV7;Q5T321;Q8NFP9	>tr|F5GXV7|F5GXV7_HUMAN Isoform of Q8NFP9, Neurobeachin OS=Homo sapiens (Human) OX=9606 GN=NBEA PE=1 SV=2;>tr|Q5T321|Q5T321_HUMAN Isoform of Q8NFP9, Neurobeachin OS=Homo sapiens (Human) OX=9606 GN=NBEA PE=1 SV=1;>sp|Q8NFP9|NBEA_HUMAN Neurobeachin OS=Homo sapiens (Human) OX=9606 GN=NBEA PE=1 SV=3	NBEA	0.856269	0.30934	No	0.250897	No	-0.853709
Q9H492;Q9H492-2	>sp|Q9H492|MLP3A_HUMAN Microtubule-associated proteins 1A/1B light chain 3A OS=Homo sapiens (Human) OX=9606 GN=MAP1LC3A PE=1 SV=2;>sp|Q9H492-2|MLP3A-2_HUMAN Isoform of Q9H492, Isoform 2 of Microtubule-associated proteins 1A/1B light chain 3A OS=Homo sapiens (Human) OX=9606 GN=MAP1LC3A PE=1 SV=2	MAP1LC3A	0.810175	0.309972	No	0.251238	No	-0.852541
P13807-2	>sp|P13807-2|GYS1-2_HUMAN Isoform of P13807, Isoform 2 of Glycogen [starch] synthase, muscle OS=Homo sapiens (Human) OX=9606 GN=GYS1 PE=1 SV=2	GYS1	1.20937	0.310197	No	0.251249	No	0.85215
P50502	>sp|P50502|F10A1_HUMAN Hsc70-interacting protein OS=Homo sapiens (Human) OX=9606 GN=ST13 PE=1 SV=2	ST13	0.886563	0.311245	No	0.251925	No	-0.850224
P53367;P53367-2;P53367-3	>sp|P53367|ARFP1_HUMAN Arfaptin-1 OS=Homo sapiens (Human) OX=9606 GN=ARFIP1 PE=1 SV=2;>sp|P53367-2|ARFP1-2_HUMAN Isoform of P53367, Isoform A of Arfaptin-1 OS=Homo sapiens (Human) OX=9606 GN=ARFIP1 PE=1 SV=2;>sp|P53367-3|ARFP1-3_HUMAN Isoform of P53367, Isoform 3 of Arfaptin-1 OS=Homo sapiens (Human) OX=9606 GN=ARFIP1 PE=1 SV=2	ARFIP1	1.18244	0.31254	No	0.252802	No	0.847913
O60486	>sp|O60486|PLXC1_HUMAN Plexin-C1 OS=Homo sapiens (Human) OX=9606 GN=PLXNC1 PE=1 SV=1	PLXNC1	1.29035	0.313026	No	0.253023	No	0.847089
P09497;P09497-2	>sp|P09497|CLCB_HUMAN Clathrin light chain B OS=Homo sapiens (Human) OX=9606 GN=CLTB PE=1 SV=1;>sp|P09497-2|CLCB-2_HUMAN Isoform of P09497, Isoform Non-brain of Clathrin light chain B OS=Homo sapiens (Human) OX=9606 GN=CLTB PE=1 SV=1	CLTB	1.30363	0.313865	No	0.25324	No	0.845617
A0A0A0MSB8;Q9UPT5;Q9UPT5-1;Q9UPT5-2;Q9UPT5-5;Q9UPT	NA	EXOC7	0.868284	0.314148	No	0.25324	No	-0.845106
P67936	>sp|P67936|TPM4_HUMAN Tropomyosin alpha-4 chain OS=Homo sapiens (Human) OX=9606 GN=TPM4 PE=1 SV=3	TPM4	0.738197	0.313945	No	0.25324	No	-0.84546
Q96AX1	>sp|Q96AX1|VP33A_HUMAN Vacuolar protein sorting-associated protein 33A OS=Homo sapiens (Human) OX=9606 GN=VPS33A PE=1 SV=1	VPS33A	1.42277	0.313889	No	0.25324	No	0.845565
Q02952;Q02952-2;Q02952-3	>sp|Q02952|AKA12_HUMAN A-kinase anchor protein 12 OS=Homo sapiens (Human) OX=9606 GN=AKAP12 PE=1 SV=4;>sp|Q02952-2|AKA12-2_HUMAN Isoform of Q02952, Isoform 2 of A-kinase anchor protein 12 OS=Homo sapiens (Human) OX=9606 GN=AKAP12 PE=1 SV=4;>sp|Q02952-3|AKA12-3_HUMAN Isoform of Q02952, Isoform 3 of A-kinase anchor protein 12 OS=Homo sapiens (Human) OX=9606 GN=AKAP12 PE=1 SV=4	AKAP12	0.890472	0.316617	No	0.254884	No	-0.840741
E9PCY7;G8JLB6;P31943	>tr|E9PCY7|E9PCY7_HUMAN Isoform of P31943, Heterogeneous nuclear ribonucleoprotein H OS=Homo sapiens (Human) OX=9606 GN=HNRNPH1 PE=1 SV=1;>tr|G8JLB6|G8JLB6_HUMAN Isoform of P31943, Heterogeneous nuclear ribonucleoprotein H OS=Homo sapiens (Human) OX=9606 GN=HNRNPH1 PE=1 SV=1;>sp|P31943|HNRH1_HUMAN Heterogeneous nuclear ribonucleoprotein H OS=Homo sapiens (Human) OX=9606 GN=HNRNPH1 PE=1 SV=4	HNRNPH1	1.11701	0.316405	No	0.254884	No	0.841109
P56537	>sp|P56537|IF6_HUMAN Eukaryotic translation initiation factor 6 OS=Homo sapiens (Human) OX=9606 GN=EIF6 PE=1 SV=1	EIF6	1.10848	0.317345	No	0.255297	No	0.839487
P30711	>sp|P30711|GSTT1_HUMAN Glutathione S-transferase theta-1 OS=Homo sapiens (Human) OX=9606 GN=GSTT1 PE=1 SV=4	GSTT1	1.40441	0.317957	No	0.25547	No	0.838406
[truncated: 923 more rows]

## Sheet: frontal NDC vs FTD-MAPT
UniProt_accession	UniProt_fasta_header	UniProt_gene_symbol	foldchange_FTDvsNDC	p_value_SAM	Significant? p < 0.05	q_value_SAM	Significant? q < 0.05	Effect_size(d)
[truncated: 2,346 more rows]

## Sheet: temporal NDC vs FTD-GRN
UniProt_accession	UniProt_fasta_header	UniProt_gene_symbol	foldchange_FTDvsNDC	p_value_SAM	Significant? p < 0.05	q_value_SAM	Significant? q < 0.05	Effect_size(d)
[truncated: 2,037 more rows]

[truncated: 2 more sheets: temporal NDC vs FTD-MAPT, ND-related proteins]
