# Supplementary material for: Distinct cell type-specific protein signatures in GRN and MAPT genetic subtypes of frontotemporal dementia
Source: Acta Neuropathol Commun. 2022 Jul 7;10:100. doi: 10.1186/s40478-022-01387-8 (PMC9261008; doi:10.1186/s40478-022-01387-8)
Supplement: Supplementary file 5 — Additional file 5 Lists of significant GO enrichment analysis results for proteins differentially expressed in frontal cortical FTD-GRN vs NDC and temporal cortical FTD-MAPT vs NDC. GO enrichment analysis was performed on proteins differentially expressed at q < 0.05, with proteins divided into lower and higher expressed proteins. For every GO term, the corresponding GO group is listed, as well as whether the GO term is considered to be a ‘Best Per Parent’ term. [file 40478_2022_1387_MOESM5_ESM.xlsx]

## Sheet: Info
Distinct cell type-specific protein signatures in GRN and MAPT genetic subtypes of frontotemporal dementia
Additional File 5 Lists of significant GO enrichment analysis results for proteins differentially expressed (at q < 0.05) in frontal cortical FTD-GRN and temporal cortical FTD-MAPT vs NDC, divided into lower and higher expressed proteins. For every GO term, the corresponding GO group is listed, as well as whether the GO term is considered to be a ‘Best Per Parent’ term

## Sheet: FTD-GRN higher expr prot
p-value	NumberProteins	GOtype	GOterm group	GOtermID	GOterm	tdepth	Proteinlist	GOGroup	BestPerParent?
0.0102	46	BP	9	GO:0009888	tissue development	1	PHLDB1,CD44,VCL,TNC,CDC42,ACADVL,FKBP1A,ICAM1,PHGDH,EZR,DSP,MAPK1,DDX17,MTHFD1,TJP1,MYH14,PFN1,FGF1,CNN3,TJP2,GNA13,RAP1B,PODXL,GSTM3,ANXA1,ITGA7,FLNB,RDX,ITGAV,IQGAP1,MSN,GSN,ITGB1,GJA1,TAGLN2,CBR1,PDLIM5,BDH2,FABP5,CTNNB1,VAMP5,CLIC4,CDH2,APOD,FLNA,TXNRD1	Tissue development	No
0.0165	33	BP	9	GO:0060429	epithelium development	2	CD44,VCL,TNC,CDC42,ACADVL,ICAM1,PHGDH,EZR,DSP,MAPK1,MTHFD1,TJP1,PFN1,FGF1,CNN3,TJP2,GNA13,RAP1B,PODXL,GSTM3,ANXA1,FLNB,RDX,IQGAP1,MSN,GJA1,TAGLN2,CBR1,BDH2,CTNNB1,CLIC4,CDH2,FLNA	Tissue development	No
0.0145	12	BP	9	GO:0003158	endothelium development	3	ICAM1,EZR,TJP1,FGF1,TJP2,RAP1B,GSTM3,RDX,MSN,GJA1,CTNNB1,CLIC4	Tissue development	Yes
0.00115	24	BP	9	GO:0030855	epithelial cell differentiation	1	CDC42,ACADVL,ICAM1,EZR,DSP,TJP1,CNN3,TJP2,RAP1B,PODXL,GSTM3,ANXA1,FLNB,RDX,IQGAP1,MSN,GJA1,TAGLN2,CBR1,BDH2,CTNNB1,CLIC4,CDH2,FLNA	Tissue development	No
0.00256	16	BP	9	GO:0002064	epithelial cell development	2	CDC42,ICAM1,EZR,TJP1,TJP2,RAP1B,PODXL,GSTM3,FLNB,RDX,IQGAP1,MSN,GJA1,CTNNB1,CLIC4,FLNA	Tissue development	Yes
0.0302	10	BP	9	GO:0001885	endothelial cell development	3	ICAM1,EZR,TJP1,TJP2,RAP1B,GSTM3,RDX,MSN,CTNNB1,CLIC4	Tissue development	No
0.00647	53	BP	11	GO:0055114	oxidation-reduction process	1	MGST1,CHDH,AKR7A2,ACAA1,PYGM,MAOB,CYBRD1,HSD17B10,ACADVL,ENO1,PGM1,HADHA,AKR1B1,BLVRB,PHGDH,MTHFD1,PYGB,SH3PXD2A,ALDH2,TPI1,LDHB,GBE1,AKR1A1,PRDX1,PRDX6,HSDL2,ACO1,PRDX5,BBOX1,TXNDC17,GRHPR,HADHB,TMX1,SORD,PGD,ALDH9A1,SELENBP1,ALDH1L1,SCD5,GLUD1,ACAD8,ACSS1,CBR1,GYG1,BDH2,CRYL1,ACAA2,PGAM1,SUCLG2,PHYHD1,APOD,ADH5,TXNRD1	Metabolism	Yes
0.00294	55	BP	4	GO:0001775	cell activation	1	LAMP2,MGST1,CD44,VCL,ACAA1,CDC42,PGM1,GSTP1,FTL,FKBP1A,ICAM1,SNAP23,DSP,MAPK1,PYGB,COTL1,ASAH1,HSPB1,CD81,TMEM30A,PADI2,PRDX1,PRDX6,GNA13,RAP1B,SLC44A2,ANXA1,TLN1,ARRB1,ITGAV,IQGAP1,MSN,STOM,GSN,ITGB1,PRKCA,CSRP1,CSTB,ARPC5,GYG1,FABP5,CTNNB1,PAFAH1B2,PGAM1,METTL7A,LAMP1,PPIA,FLNA,SPTAN1,PNP,APRT,CLIC1,CPNE1,HBB,CYFIP1	Immune	Yes
0.000882	31	BP	8	GO:0035295	tube development	1	RNH1,TNC,CDC42,AKR1B1,NRCAM,PHGDH,MAPK1,MTHFD1,HSPB1,PFN1,QKI,FGF1,GNA13,RRAS,PODXL,ASS1,ANXA1,TNS3,ITGAV,NTRK2,HIKESHI,ITGB1,GJA1,DDAH1,PRKCA,PLCD3,CTNNB1,CLIC4,CDH2,PLCD1,APOD	Tissue development	No
0.0109	25	BP	8	GO:0035239	tube morphogenesis	2	RNH1,TNC,CDC42,NRCAM,MTHFD1,HSPB1,PFN1,QKI,FGF1,GNA13,RRAS,PODXL,ANXA1,ITGAV,NTRK2,ITGB1,GJA1,DDAH1,PRKCA,PLCD3,CTNNB1,CLIC4,CDH2,PLCD1,APOD	Tissue development	Yes
0.0132	22	BP	8	GO:0072358	cardiovascular system development	1	RNH1,CDC42,NRCAM,MAPK1,HSPB1,QKI,FGF1,GNA13,RRAS,ANXA1,ITGAV,NTRK2,ITGB1,GJA1,DDAH1,PRKCA,PLCD3,CTNNB1,CLIC4,CDH2,PLCD1,APOD	Tissue development	No
0.0132	22	BP	8	GO:0001944	vasculature development	2	RNH1,CDC42,NRCAM,MAPK1,HSPB1,QKI,FGF1,GNA13,RRAS,ANXA1,ITGAV,NTRK2,ITGB1,GJA1,DDAH1,PRKCA,PLCD3,CTNNB1,CLIC4,CDH2,PLCD1,APOD	Tissue development	Yes
0.00669	22	BP	8	GO:0001568	blood vessel development	1	RNH1,CDC42,NRCAM,MAPK1,HSPB1,QKI,FGF1,GNA13,RRAS,ANXA1,ITGAV,NTRK2,ITGB1,GJA1,DDAH1,PRKCA,PLCD3,CTNNB1,CLIC4,CDH2,PLCD1,APOD	Tissue development	No
0.00481	21	BP	8	GO:0048514	blood vessel morphogenesis	2	RNH1,CDC42,NRCAM,HSPB1,QKI,FGF1,GNA13,RRAS,ANXA1,ITGAV,NTRK2,ITGB1,GJA1,DDAH1,PRKCA,PLCD3,CTNNB1,CLIC4,CDH2,PLCD1,APOD	Tissue development	Yes
0.00208	38	BP	5	GO:0044283	small molecule biosynthetic process	1	VCAN,ACADVL,ENO1,SLC1A3,PGM1,AKR1B1,PHGDH,SEC14L2,MTHFD1,ISYNA1,PTGDS,GALK1,TPI1,QKI,FGF1,RBP1,AKR1A1,ASS1,RAN,BCAN,ANXA1,PSAT1,SORD,PGD,SCD5,ERLIN2,GLUD1,ACSS1,CBR1,TKT,BDH2,FABP5,ACAA2,SRR,HINT1,PGAM1,PNP,APRT	Metabolism	Yes
0.00854	50	BP	5	GO:0006082	organic acid metabolic process	1	CD44,VCAN,ACAA1,HSD17B10,ACADVL,ENO1,SLC1A3,PGM1,GSTP1,HADHA,PHGDH,MTHFD1,SMS,PTGDS,GALK1,TPI1,LDHB,QKI,RBP1,ABHD14B,AKR1A1,ACO1,NAGK,ASS1,BCAN,ANXA1,PSAT1,GRHPR,HADHB,SORD,PGD,ALDH1L1,SCD5,ERLIN2,GLUD1,ACAD8,DDAH1,ACSS1,SLC16A1,CBR1,BDH2,FABP5,CRYL1,ACAA2,SRR,PGAM1,SUCLG2,PNP,GSTM2,DDAH2	Metabolism	No
0.0157	49	BP	5	GO:0043436	oxoacid metabolic process	2	CD44,VCAN,ACAA1,HSD17B10,ACADVL,ENO1,SLC1A3,PGM1,GSTP1,HADHA,PHGDH,MTHFD1,SMS,PTGDS,GALK1,TPI1,LDHB,QKI,RBP1,ABHD14B,AKR1A1,ACO1,NAGK,ASS1,BCAN,ANXA1,PSAT1,GRHPR,HADHB,SORD,PGD,ALDH1L1,SCD5,ERLIN2,GLUD1,ACAD8,DDAH1,ACSS1,SLC16A1,CBR1,BDH2,FABP5,CRYL1,ACAA2,SRR,PGAM1,SUCLG2,GSTM2,DDAH2	Metabolism	No
0.0186	48	BP	5	GO:0019752	carboxylic acid metabolic process	3	CD44,VCAN,ACAA1,HSD17B10,ACADVL,ENO1,SLC1A3,PGM1,GSTP1,HADHA,PHGDH,MTHFD1,SMS,PTGDS,GALK1,TPI1,LDHB,QKI,RBP1,AKR1A1,ACO1,NAGK,ASS1,BCAN,ANXA1,PSAT1,GRHPR,HADHB,SORD,PGD,ALDH1L1,SCD5,ERLIN2,GLUD1,ACAD8,DDAH1,ACSS1,SLC16A1,CBR1,BDH2,FABP5,CRYL1,ACAA2,SRR,PGAM1,SUCLG2,GSTM2,DDAH2	Metabolism	No
0.011	34	BP	5	GO:0032787	monocarboxylic acid metabolic process	4	VCAN,ACAA1,ACADVL,ENO1,SLC1A3,PGM1,GSTP1,HADHA,PHGDH,PTGDS,GALK1,TPI1,LDHB,QKI,RBP1,AKR1A1,BCAN,ANXA1,GRHPR,HADHB,SORD,PGD,SCD5,ERLIN2,ACSS1,SLC16A1,CBR1,BDH2,FABP5,CRYL1,ACAA2,SRR,PGAM1,GSTM2	Metabolism	Yes
0.0109	25	BP	5	GO:0016053	organic acid biosynthetic process	2	VCAN,ACADVL,ENO1,SLC1A3,PGM1,PHGDH,MTHFD1,PTGDS,GALK1,TPI1,QKI,RBP1,AKR1A1,ASS1,BCAN,ANXA1,PSAT1,SCD5,ERLIN2,GLUD1,ACSS1,CBR1,FABP5,SRR,PGAM1	Metabolism	No
0.0109	25	BP	5	GO:0046394	carboxylic acid biosynthetic process	3	VCAN,ACADVL,ENO1,SLC1A3,PGM1,PHGDH,MTHFD1,PTGDS,GALK1,TPI1,QKI,RBP1,AKR1A1,ASS1,BCAN,ANXA1,PSAT1,SCD5,ERLIN2,GLUD1,ACSS1,CBR1,FABP5,SRR,PGAM1	Metabolism	Yes
0.0299	38	BP	3	GO:0036230	granulocyte activation	1	LAMP2,MGST1,CD44,VCL,ACAA1,PGM1,GSTP1,FTL,SNAP23,DSP,MAPK1,PYGB,COTL1,ASAH1,TMEM30A,PADI2,PRDX6,RAP1B,SLC44A2,ITGAV,IQGAP1,STOM,GSN,CSTB,ARPC5,GYG1,FABP5,PAFAH1B2,PGAM1,METTL7A,LAMP1,PPIA,SPTAN1,PNP,APRT,CPNE1,HBB,CYFIP1	Immune	No
0.0263	38	BP	3	GO:0042119	neutrophil activation	2	LAMP2,MGST1,CD44,VCL,ACAA1,PGM1,GSTP1,FTL,SNAP23,DSP,MAPK1,PYGB,COTL1,ASAH1,TMEM30A,PADI2,PRDX6,RAP1B,SLC44A2,ITGAV,IQGAP1,STOM,GSN,CSTB,ARPC5,GYG1,FABP5,PAFAH1B2,PGAM1,METTL7A,LAMP1,PPIA,SPTAN1,PNP,APRT,CPNE1,HBB,CYFIP1	Immune	No
0.0263	38	BP	3	GO:0002283	neutrophil activation involved in immune response	3	LAMP2,MGST1,CD44,VCL,ACAA1,PGM1,GSTP1,FTL,SNAP23,DSP,MAPK1,PYGB,COTL1,ASAH1,TMEM30A,PADI2,PRDX6,RAP1B,SLC44A2,ITGAV,IQGAP1,STOM,GSN,CSTB,ARPC5,GYG1,FABP5,PAFAH1B2,PGAM1,METTL7A,LAMP1,PPIA,SPTAN1,PNP,APRT,CPNE1,HBB,CYFIP1	Immune	Yes
0.0299	38	BP	3	GO:0002446	neutrophil mediated immunity	1	LAMP2,MGST1,CD44,VCL,ACAA1,PGM1,GSTP1,FTL,SNAP23,DSP,MAPK1,PYGB,COTL1,ASAH1,TMEM30A,PADI2,PRDX6,RAP1B,SLC44A2,ITGAV,IQGAP1,STOM,GSN,CSTB,ARPC5,GYG1,FABP5,PAFAH1B2,PGAM1,METTL7A,LAMP1,PPIA,SPTAN1,PNP,APRT,CPNE1,HBB,CYFIP1	Immune	Yes
0.0263	38	BP	3	GO:0043312	neutrophil degranulation	1	LAMP2,MGST1,CD44,VCL,ACAA1,PGM1,GSTP1,FTL,SNAP23,DSP,MAPK1,PYGB,COTL1,ASAH1,TMEM30A,PADI2,PRDX6,RAP1B,SLC44A2,ITGAV,IQGAP1,STOM,GSN,CSTB,ARPC5,GYG1,FABP5,PAFAH1B2,PGAM1,METTL7A,LAMP1,PPIA,SPTAN1,PNP,APRT,CPNE1,HBB,CYFIP1	Immune	Yes
0.00434	32	BP	10	GO:0098609	cell-cell adhesion	1	CD44,VCL,CTNNA2,CDC42,ICAM1,NRCAM,EZR,DSP,HSPB1,CNN3,PODXL,ASS1,ANXA1,ITGA7,TLN1,RDX,ITGAV,MSN,ITGB1,PRKCA,NCAM2,CSRP1,PLPP3,PDLIM5,FAT3,CTNNB1,ALCAM,CDH2,FLNA,PNP,CLIC1,HBB	Adhesion	Yes
0.0302	10	CC	12	GO:0005902	microvillus	1	CD44,AKR1B1,EZR,PODXL,RDX,ITGAV,MSN,CTNNB1,CLIC4,MYO6	Rest	Yes
0.0105	68	CC	1	GO:0030054	cell junction	1	FHL1,CD44,VCL,TNC,CTNNA2,CDC42,RPL31,EPB41L2,AKR1B1,ICAM1,SNAP23,EZR,DSP,MAPK1,SNTA1,TJP1,HSPB1,SH3PXD2A,PFN1,CD81,CNN3,TJP2,GNA13,AHNAK,RRAS,RAP1B,PODXL,DTNA,ANXA1,FLNB,TNS3,TLN1,RDX,ITGAV,IQGAP1,MSN,GSN,RSU1,ADD3,ITGB1,GJA1,FARP1,SLC16A1,CSRP1,PLPP3,ARPC5,CAPN2,PDLIM5,SYNPR,ANXA5,FABP7,FABP5,HEPACAM,PPIB,CTNNB1,VAMP5,CLIC4,ALCAM,CDH2,CALB2,PLEC,KCTD12,CDC42EP4,AGRN,PPIA,FLNA,FXYD1,CYFIP1	Adhesion	No
0.000118	49	CC	1	GO:0070161	anchoring junction	2	FHL1,CD44,VCL,TNC,CTNNA2,CDC42,RPL31,EPB41L2,ICAM1,SNAP23,EZR,DSP,MAPK1,TJP1,HSPB1,PFN1,CD81,CNN3,TJP2,GNA13,AHNAK,RRAS,ANXA1,FLNB,TNS3,TLN1,RDX,ITGAV,IQGAP1,MSN,GSN,RSU1,ITGB1,GJA1,CSRP1,PLPP3,ARPC5,CAPN2,PDLIM5,ANXA5,PPIB,CTNNB1,ALCAM,CDH2,PLEC,CDC42EP4,PPIA,FLNA,CYFIP1	Adhesion	No
7.48e-05	49	CC	1	GO:0005912	adherens junction	3	FHL1,CD44,VCL,TNC,CTNNA2,CDC42,RPL31,EPB41L2,ICAM1,SNAP23,EZR,DSP,MAPK1,TJP1,HSPB1,PFN1,CD81,CNN3,TJP2,GNA13,AHNAK,RRAS,ANXA1,FLNB,TNS3,TLN1,RDX,ITGAV,IQGAP1,MSN,GSN,RSU1,ITGB1,GJA1,CSRP1,PLPP3,ARPC5,CAPN2,PDLIM5,ANXA5,PPIB,CTNNB1,ALCAM,CDH2,PLEC,CDC42EP4,PPIA,FLNA,CYFIP1	Adhesion	Yes
0.00635	29	CC	1	GO:0005911	cell-cell junction	2	VCL,CTNNA2,CDC42,AKR1B1,SNAP23,DSP,TJP1,CNN3,TJP2,AHNAK,RAP1B,PODXL,ANXA1,RDX,IQGAP1,ADD3,ITGB1,GJA1,PDLIM5,FABP7,HEPACAM,CTNNB1,VAMP5,CLIC4,CDH2,CALB2,CDC42EP4,FLNA,FXYD1	Adhesion	Yes
0.00129	42	CC	1	GO:0030055	cell-substrate junction	2	FHL1,CD44,VCL,TNC,CDC42,RPL31,EPB41L2,ICAM1,SNAP23,EZR,MAPK1,HSPB1,PFN1,CD81,CNN3,GNA13,AHNAK,RRAS,ANXA1,FLNB,TNS3,TLN1,RDX,ITGAV,IQGAP1,MSN,GSN,RSU1,ITGB1,GJA1,CSRP1,ARPC5,CAPN2,ANXA5,PPIB,CTNNB1,ALCAM,CDH2,PLEC,PPIA,FLNA,CYFIP1	Adhesion	No
0.00129	42	CC	1	GO:0005924	cell-substrate adherens junction	3	FHL1,CD44,VCL,TNC,CDC42,RPL31,EPB41L2,ICAM1,SNAP23,EZR,MAPK1,HSPB1,PFN1,CD81,CNN3,GNA13,AHNAK,RRAS,ANXA1,FLNB,TNS3,TLN1,RDX,ITGAV,IQGAP1,MSN,GSN,RSU1,ITGB1,GJA1,CSRP1,ARPC5,CAPN2,ANXA5,PPIB,CTNNB1,ALCAM,CDH2,PLEC,PPIA,FLNA,CYFIP1	Adhesion	No
0.00129	42	CC	1	GO:0005925	focal adhesion	4	FHL1,CD44,VCL,TNC,CDC42,RPL31,EPB41L2,ICAM1,SNAP23,EZR,MAPK1,HSPB1,PFN1,CD81,CNN3,GNA13,AHNAK,RRAS,ANXA1,FLNB,TNS3,TLN1,RDX,ITGAV,IQGAP1,MSN,GSN,RSU1,ITGB1,GJA1,CSRP1,ARPC5,CAPN2,ANXA5,PPIB,CTNNB1,ALCAM,CDH2,PLEC,PPIA,FLNA,CYFIP1	Adhesion	Yes
2.27e-14	154	CC	2	GO:0005576	extracellular region	1	AK2,LAMP2,SYPL1,PTBP1,CNTN1,RNH1,CD44,VCL,VCAN,TNC,AKR7A2,PHPT1,CROCC,ACAA1,PYGM,PFN2,CDC42,RPL31,CYBRD1,ENO1,SRI,PGM1,EPB41L2,GSTP1,AKR1B1,FTL,BLVRB,ICAM1,NRCAM,SNAP23,PHGDH,EZR,DSP,SEC14L2,MAPK1,MTHFD1,CPNE6,PSME2,PYGB,SMS,COTL1,ASAH1,MYH14,HSPB1,AK1,PTGDS,GALK1,PFN1,CD81,ALDH2,ARHGDIB,TPI1,LDHB,FGF1,RPL24,GBE1,ABHD14B,SPTBN1,PADI2,AKR1A1,PRDX1,PRDX6,GNA13,ACO1,CSE1L,NAGK,AHNAK,SNRPD2,PRDX5,RRA…	Extracellular	No
6.94e-15	149	CC	2	GO:0044421	extracellular region part	2	AK2,LAMP2,SYPL1,PTBP1,CNTN1,RNH1,CD44,VCL,VCAN,TNC,AKR7A2,PHPT1,CROCC,PYGM,PFN2,CDC42,RPL31,CYBRD1,ENO1,SRI,PGM1,EPB41L2,GSTP1,AKR1B1,FTL,BLVRB,ICAM1,SNAP23,PHGDH,EZR,DSP,SEC14L2,MTHFD1,CPNE6,PSME2,PYGB,SMS,COTL1,ASAH1,MYH14,HSPB1,AK1,PTGDS,GALK1,PFN1,CD81,ALDH2,ARHGDIB,TPI1,LDHB,FGF1,RPL24,GBE1,ABHD14B,SPTBN1,PADI2,AKR1A1,PRDX1,PRDX6,GNA13,ACO1,CSE1L,NAGK,AHNAK,SNRPD2,PRDX5,RRAS,HSPA2,RAP1B,PODX…	Extracellular	Yes
1.84e-14	141	CC	2	GO:0043230	extracellular organelle	3	AK2,LAMP2,SYPL1,PTBP1,CNTN1,RNH1,CD44,VCL,AKR7A2,PHPT1,CROCC,PYGM,PFN2,CDC42,RPL31,CYBRD1,ENO1,SRI,PGM1,EPB41L2,GSTP1,AKR1B1,FTL,BLVRB,ICAM1,SNAP23,PHGDH,EZR,DSP,SEC14L2,MTHFD1,CPNE6,PSME2,PYGB,SMS,COTL1,ASAH1,MYH14,HSPB1,AK1,PTGDS,GALK1,PFN1,CD81,ALDH2,ARHGDIB,TPI1,LDHB,RPL24,GBE1,ABHD14B,SPTBN1,PADI2,AKR1A1,PRDX1,PRDX6,GNA13,ACO1,CSE1L,NAGK,AHNAK,SNRPD2,PRDX5,RRAS,HSPA2,RAP1B,PODXL,BBOX1,TXNDC1…	Extracellular	No
3.36e-14	145	CC	2	GO:0005615	extracellular space	3	AK2,LAMP2,SYPL1,PTBP1,CNTN1,RNH1,CD44,VCL,VCAN,TNC,AKR7A2,PHPT1,CROCC,PYGM,PFN2,CDC42,RPL31,CYBRD1,ENO1,SRI,PGM1,EPB41L2,GSTP1,AKR1B1,FTL,BLVRB,ICAM1,SNAP23,PHGDH,EZR,DSP,SEC14L2,MTHFD1,CPNE6,PSME2,PYGB,SMS,COTL1,ASAH1,MYH14,HSPB1,AK1,PTGDS,GALK1,PFN1,CD81,ALDH2,ARHGDIB,TPI1,LDHB,FGF1,RPL24,GBE1,ABHD14B,SPTBN1,PADI2,AKR1A1,PRDX1,PRDX6,GNA13,ACO1,CSE1L,NAGK,AHNAK,SNRPD2,PRDX5,RRAS,HSPA2,RAP1B,PODX…	Extracellular	Yes
2.46e-06	155	CC	2	GO:0031982	vesicle	1	AK2,LAMP2,SYPL1,MGST1,PTBP1,CNTN1,RNH1,CD44,VCL,AKR7A2,PHPT1,CROCC,ACAA1,PYGM,PFN2,CSNK2A2,CDC42,RPL31,CYBRD1,ENO1,SRI,PGM1,EPB41L2,GSTP1,AKR1B1,FTL,BLVRB,ICAM1,SNAP23,PHGDH,EZR,DSP,SEC14L2,MAPK1,MTHFD1,CPNE6,PSME2,PYGB,SMS,COTL1,ASAH1,MYH14,HSPB1,AK1,PTGDS,GALK1,PFN1,CD81,ALDH2,ARHGDIB,TPI1,LDHB,TMEM30A,RPL24,GBE1,ABHD14B,SPTBN1,PADI2,AKR1A1,PRDX1,PRDX6,GNA13,ACO1,CSE1L,NAGK,AHNAK,SNRPD2,PRDX5,R…	Extracellular	No
1.84e-14	141	CC	2	GO:1903561	extracellular vesicle	2	AK2,LAMP2,SYPL1,PTBP1,CNTN1,RNH1,CD44,VCL,AKR7A2,PHPT1,CROCC,PYGM,PFN2,CDC42,RPL31,CYBRD1,ENO1,SRI,PGM1,EPB41L2,GSTP1,AKR1B1,FTL,BLVRB,ICAM1,SNAP23,PHGDH,EZR,DSP,SEC14L2,MTHFD1,CPNE6,PSME2,PYGB,SMS,COTL1,ASAH1,MYH14,HSPB1,AK1,PTGDS,GALK1,PFN1,CD81,ALDH2,ARHGDIB,TPI1,LDHB,RPL24,GBE1,ABHD14B,SPTBN1,PADI2,AKR1A1,PRDX1,PRDX6,GNA13,ACO1,CSE1L,NAGK,AHNAK,SNRPD2,PRDX5,RRAS,HSPA2,RAP1B,PODXL,BBOX1,TXNDC1…	Extracellular	No
9.36e-15	141	CC	2	GO:0070062	extracellular exosome	3	AK2,LAMP2,SYPL1,PTBP1,CNTN1,RNH1,CD44,VCL,AKR7A2,PHPT1,CROCC,PYGM,PFN2,CDC42,RPL31,CYBRD1,ENO1,SRI,PGM1,EPB41L2,GSTP1,AKR1B1,FTL,BLVRB,ICAM1,SNAP23,PHGDH,EZR,DSP,SEC14L2,MTHFD1,CPNE6,PSME2,PYGB,SMS,COTL1,ASAH1,MYH14,HSPB1,AK1,PTGDS,GALK1,PFN1,CD81,ALDH2,ARHGDIB,TPI1,LDHB,RPL24,GBE1,ABHD14B,SPTBN1,PADI2,AKR1A1,PRDX1,PRDX6,GNA13,ACO1,CSE1L,NAGK,AHNAK,SNRPD2,PRDX5,RRAS,HSPA2,RAP1B,PODXL,BBOX1,TXNDC1…	Extracellular	Yes
0.019	15	MF	7	GO:0043177	organic acid binding	1	CD44,VCAN,SLC1A3,PTGDS,ASS1,BCAN,GRHPR,ARHGDIA,GLUD1,DDAH1,FABP5,SRR,AGRN,ADH5,DDAH2	Rest	No
0.0138	15	MF	7	GO:0031406	carboxylic acid binding	2	CD44,VCAN,SLC1A3,PTGDS,ASS1,BCAN,GRHPR,ARHGDIA,GLUD1,DDAH1,FABP5,SRR,AGRN,ADH5,DDAH2	Rest	Yes
0.0167	42	MF	6	GO:0016491	oxidoreductase activity	1	MGST1,CHDH,AKR7A2,ACAA1,MAOB,CYBRD1,HSD17B10,ACADVL,GSTP1,HADHA,AKR1B1,BLVRB,PHGDH,MTHFD1,ALDH2,LDHB,AKR1A1,PRDX1,PRDX6,HSDL2,PRDX5,BBOX1,TXNDC17,GRHPR,HADHB,TMX1,SORD,PGD,ALDH9A1,SELENBP1,ALDH1L1,SCD5,GLUD1,ACAD8,CBR1,BDH2,CRYL1,PHYHD1,ADH5,TXNRD1,GSTM2,HBB	Metabolism	No
0.0135	16	MF	6	GO:0016614	oxidoreductase activity, acting on CH-OH group of donors	2	CHDH,AKR7A2,HSD17B10,HADHA,AKR1B1,PHGDH,LDHB,AKR1A1,GRHPR,HADHB,SORD,PGD,CBR1,BDH2,CRYL1,ADH5	Metabolism	Yes
0.0259	15	MF	6	GO:0016616	oxidoreductase activity, acting on the CH-OH group of donors, NAD or NADP as acceptor	3	AKR7A2,HSD17B10,HADHA,AKR1B1,PHGDH,LDHB,AKR1A1,GRHPR,HADHB,SORD,PGD,CBR1,BDH2,CRYL1,ADH5	Metabolism	No

## Sheet: FTD-GRN lower expr prot
p-value	NumberProteins	GOtype	GOterm group	GOtermID	GOterm	tdepth	Proteinlist	GOGroup	BestPerParent?
0.0255	63	BP	4	GO:0055085	transmembrane transport	1	CACNG3,AGK,ATP6V1H,KCNAB2,GNB5,SEL1L,PICALM,ADD2,DLG1,ACTN2,VDAC3,DLG3,TIMM13,TOMM22,ATP6V1D,SRP54,NCALD,TIMM50,GSK3A,ATP5F1B,PEX5L,SLC30A3,COX7A2L,ATP5PB,GRIA2,PTK2B,PEX16,SLC25A23,GRIA3,ATP6V1F,ACTN4,COX4I1,UBQLN1,COX5B,BIN1,CACNG8,PEX14,ATP1B1,CAMK2D,PIK3R1,PAK1,ANK3,ATP5F1A,HOMER1,TOMM70,ATP6V1C1,SLC24A2,ATP2B2,DMTN,SFXN1,HCN1,PRKCE,TOMM20,KCNA2,COX5A,NDUFA13,CHP1,SCN8A,MT-CO2,OPA1,VDAC1,FXYD…	Rest	Yes
0.0286	39	BP	10	GO:0045664	regulation of neuron differentiation	1	SARM1,RUFY3,CAMK2B,NGEF,RAP1GAP,PAK3,MAP2,DNM1L,STX1B,MAG,PRPF19,ARHGEF2,CAMSAP2,PTK2B,APOE,OLFM1,MAP1B,SNAP25,BIN1,ITPKA,PPP3CA,MAPK8IP3,SYT2,PAK1,ASAP1,PTPRD,BAG5,NDEL1,LINGO1,BAIAP2,CAMK1D,MAPT,RTN4RL2,AP2A1,SYNGAP1,OPA1,PLXNA4,SHANK3,NEFL	Neuron	Yes
0.00679	48	BP	1	GO:0099536	synaptic signaling	1	SYT7,CAMK2B,GUCY1B1,SNCB,DLG1,AMPH,VDAC3,IGSF9B,DLG3,DNM1L,RPH3A,STX1B,PICK1,SNPH,GSK3A,LGI1,MPP2,CSPG5,GLS,GRIA2,PTK2B,GRIA3,VGF,APOE,SNAP25,ITPKA,PPP3CA,SYT2,HOMER1,PLCL2,SLC24A2,SHANK2,MAP1A,PRRT2,CPLX1,DLGAP1,PRKCE,CLSTN1,SYNPO,SYT12,SNCG,BAIAP2,SYN3,PIP5K1C,MAPT,SYNGAP1,VDAC1,SHANK3	Synapse	No
0.00679	48	BP	1	GO:0099537	trans-synaptic signaling	2	SYT7,CAMK2B,GUCY1B1,SNCB,DLG1,AMPH,VDAC3,IGSF9B,DLG3,DNM1L,RPH3A,STX1B,PICK1,SNPH,GSK3A,LGI1,MPP2,CSPG5,GLS,GRIA2,PTK2B,GRIA3,VGF,APOE,SNAP25,ITPKA,PPP3CA,SYT2,HOMER1,PLCL2,SLC24A2,SHANK2,MAP1A,PRRT2,CPLX1,DLGAP1,PRKCE,CLSTN1,SYNPO,SYT12,SNCG,BAIAP2,SYN3,PIP5K1C,MAPT,SYNGAP1,VDAC1,SHANK3	Synapse	No
0.00576	48	BP	1	GO:0098916	anterograde trans-synaptic signaling	3	SYT7,CAMK2B,GUCY1B1,SNCB,DLG1,AMPH,VDAC3,IGSF9B,DLG3,DNM1L,RPH3A,STX1B,PICK1,SNPH,GSK3A,LGI1,MPP2,CSPG5,GLS,GRIA2,PTK2B,GRIA3,VGF,APOE,SNAP25,ITPKA,PPP3CA,SYT2,HOMER1,PLCL2,SLC24A2,SHANK2,MAP1A,PRRT2,CPLX1,DLGAP1,PRKCE,CLSTN1,SYNPO,SYT12,SNCG,BAIAP2,SYN3,PIP5K1C,MAPT,SYNGAP1,VDAC1,SHANK3	Synapse	No
0.00576	48	BP	1	GO:0007268	chemical synaptic transmission	4	SYT7,CAMK2B,GUCY1B1,SNCB,DLG1,AMPH,VDAC3,IGSF9B,DLG3,DNM1L,RPH3A,STX1B,PICK1,SNPH,GSK3A,LGI1,MPP2,CSPG5,GLS,GRIA2,PTK2B,GRIA3,VGF,APOE,SNAP25,ITPKA,PPP3CA,SYT2,HOMER1,PLCL2,SLC24A2,SHANK2,MAP1A,PRRT2,CPLX1,DLGAP1,PRKCE,CLSTN1,SYNPO,SYT12,SNCG,BAIAP2,SYN3,PIP5K1C,MAPT,SYNGAP1,VDAC1,SHANK3	Synapse	Yes
0.00582	23	CC	2	GO:1990204	oxidoreductase complex	1	PDK2,UQCRC1,PDHX,NDUFS8,NDUFB3,DLST,NDUFA5,PDHA1,MRPS36,DBT,NDUFA9,UQCRC2,DLAT,NDUFC2,NDUFV3,NDUFB8,NDUFV1,PDHB,NDUFA12,NDUFA6,NDUFA13,OGDHL,NDUFS3	Mitochondria	Yes
0.00621	33	CC	9	GO:0044455	mitochondrial membrane part	1	SARM1,AGK,UQCRC1,TOMM22,SAMM50,TIMM50,NDUFS8,ATP5F1B,COX7A2L,ATP5PB,MFN2,NDUFB3,NDUFA5,COX4I1,COX5B,NDUFA9,UQCRC2,NDUFC2,ATP5F1A,TOMM70,NDUFV3,NDUFB8,NDUFV1,MFF,TOMM20,COX5A,NDUFA12,APOO,NDUFA6,NDUFA13,MT-CO2,OPA1,NDUFS3	Mitochondria	Yes
0.00365	101	CC	7	GO:0097458	neuron part	1	SARM1,CACNG3,ADAM22,SYT7,PPP5C,RUFY3,CAMK2B,GUCY1B1,MAP2K4,NGEF,ROGDI,GRIPAP1,SIRT2,KCNAB2,GNB5,AP3M2,PICALM,ADD2,DLG1,RAP1GAP,ACTN2,MAP2,AMPH,IGSF9B,EPB41L3,DLG3,DNM1L,RPH3A,STX1B,PICK1,NEFH,ABHD12,SNPH,AP3B2,NEFM,MAG,GSK3A,MPP2,NECTIN1,CAP2,SLC30A3,STRN,AAK1,ARHGEF2,DNAJC6,VAMP4,GRIA2,PTK2B,GOT2,APOE,ACTN4,OLFM1,MPP1,KIF3A,MAP1B,SNAP25,BIN1,ITPKA,PPP3CA,MAPK8IP3,VAMP1,CACNG8,SYT2,CAMK2D,PAK1,AN…	Synapse	Yes
0.00296	72	CC	7	GO:0045202	synapse	1	SARM1,CACNG3,SYT7,CAMK2B,GUCY1B1,ROGDI,GRIPAP1,KCNAB2,PICALM,SNCB,ADD2,DLG1,ACTN2,MAP2,AMPH,IGSF9B,EPB41L3,DLG3,DNM1L,RPH3A,STX1B,PICK1,NEFH,SNPH,GSK3A,LGI1,MPP2,NECTIN1,CAP2,WASF1,SLC30A3,STRN,AAK1,ARHGEF2,DNAJC6,VAMP4,GRIA2,PTK2B,GRIA3,OLFM1,KIF3A,MAP1B,SNAP25,ITPKA,PPP3CA,VAMP1,CACNG8,SYT2,ANK3,HOMER1,ASAP1,ATP2B2,DMTN,SHANK2,NDEL1,PRRT2,LGI3,MFF,CPLX1,DLGAP1,CLSTN1,GPHN,SYNPO,SYT12,BAIAP2,KCN…	Synapse	No
0.0202	29	CC	7	GO:0098984	neuron to neuron synapse	2	CACNG3,KCNAB2,ADD2,DLG1,MAP2,IGSF9B,EPB41L3,DLG3,PICK1,NEFH,MPP2,CAP2,STRN,ARHGEF2,DNAJC6,PTK2B,MAP1B,CACNG8,HOMER1,DMTN,SHANK2,PRRT2,DLGAP1,CLSTN1,SYNPO,BAIAP2,ANKS1B,SYN3,SYNGAP1	Synapse	No
0.0127	29	CC	7	GO:0032279	asymmetric synapse	3	CACNG3,KCNAB2,ADD2,DLG1,MAP2,IGSF9B,EPB41L3,DLG3,PICK1,NEFH,MPP2,CAP2,STRN,ARHGEF2,DNAJC6,PTK2B,MAP1B,CACNG8,HOMER1,DMTN,SHANK2,PRRT2,DLGAP1,CLSTN1,SYNPO,BAIAP2,ANKS1B,SYN3,SYNGAP1	Synapse	Yes
0.00324	64	CC	7	GO:0044456	synapse part	2	CACNG3,SYT7,GUCY1B1,ROGDI,GRIPAP1,KCNAB2,PICALM,ADD2,DLG1,ACTN2,MAP2,AMPH,IGSF9B,EPB41L3,DLG3,DNM1L,RPH3A,STX1B,PICK1,NEFH,SNPH,GSK3A,MPP2,NECTIN1,CAP2,SLC30A3,STRN,AAK1,ARHGEF2,DNAJC6,VAMP4,GRIA2,PTK2B,GRIA3,MAP1B,SNAP25,ITPKA,PPP3CA,VAMP1,CACNG8,SYT2,ANK3,HOMER1,ASAP1,DMTN,SHANK2,NDEL1,PRRT2,LGI3,MFF,CPLX1,DLGAP1,CLSTN1,GPHN,SYNPO,SYT12,BAIAP2,KCNA2,ANKS1B,SYN3,PIP5K1C,MAPT,SYNGAP1,VDAC1	Synapse	Yes
0.00862	43	CC	7	GO:0098794	postsynapse	1	CACNG3,GRIPAP1,KCNAB2,PICALM,ADD2,DLG1,ACTN2,MAP2,IGSF9B,EPB41L3,DLG3,DNM1L,PICK1,NEFH,GSK3A,MPP2,CAP2,STRN,ARHGEF2,DNAJC6,GRIA2,PTK2B,GRIA3,MAP1B,SNAP25,ITPKA,PPP3CA,CACNG8,ANK3,HOMER1,ASAP1,DMTN,SHANK2,PRRT2,DLGAP1,CLSTN1,GPHN,SYNPO,BAIAP2,ANKS1B,SYN3,MAPT,SYNGAP1	Synapse	No
0.0127	29	CC	7	GO:0099572	postsynaptic specialization	2	CACNG3,KCNAB2,ADD2,DLG1,MAP2,IGSF9B,EPB41L3,DLG3,PICK1,NEFH,MPP2,CAP2,STRN,ARHGEF2,DNAJC6,PTK2B,MAP1B,CACNG8,HOMER1,DMTN,SHANK2,PRRT2,DLGAP1,CLSTN1,SYNPO,BAIAP2,ANKS1B,SYN3,SYNGAP1	Synapse	No
0.0127	29	CC	7	GO:0014069	postsynaptic density	3	CACNG3,KCNAB2,ADD2,DLG1,MAP2,IGSF9B,EPB41L3,DLG3,PICK1,NEFH,MPP2,CAP2,STRN,ARHGEF2,DNAJC6,PTK2B,MAP1B,CACNG8,HOMER1,DMTN,SHANK2,PRRT2,DLGAP1,CLSTN1,SYNPO,BAIAP2,ANKS1B,SYN3,SYNGAP1	Synapse	Yes
0.0226	69	CC	11	GO:0098796	membrane protein complex	1	CACNG3,AGK,UQCRC1,ATP6V1H,KCNAB2,UFD1,AP3M2,SEL1L,TFRC,PICALM,DLG1,VDAC3,TOLLIP,DLG3,ARCN1,STX1B,TOMM22,AP1B1,SAMM50,ATP6V1D,ABHD12,AP3B2,NCALD,TIMM50,NDUFS8,ATP5F1B,ATP5PB,VAMP4,SGIP1,NDUFB3,GRIA2,PTK2B,GRIA3,ATP6V1F,NDUFA5,COX4I1,SNAP25,COX5B,NDUFA9,VAMP1,UQCRC2,CACNG8,ATP1B1,PIK3R1,NDUFC2,ATP5F1A,TOMM70,ATP6V1C1,NDUFV3,SHANK2,HCN1,NDUFB8,AP1G1,NDUFV1,HOOK3,CPLX1,TOMM20,KCNA2,AP3S1,COX5A,NDUFA1…	Mitochondria	Yes
0.000267	34	CC	6	GO:0098798	mitochondrial protein complex	1	PDK2,AGK,UQCRC1,TIMM13,TOMM22,SAMM50,TIMM50,NDUFS8,ATP5F1B,ATP5PB,NDUFB3,NDUFA5,COX4I1,MRPS36,COX5B,DBT,NDUFA9,UQCRC2,DLAT,NDUFC2,ATP5F1A,TOMM70,NDUFV3,NDUFB8,NDUFV1,TOMM20,COX5A,NDUFA12,APOO,NDUFA6,NDUFA13,MT-CO2,VDAC1,NDUFS3	Mitochondria	Yes
0.0284	14	CC	5	GO:0044304	main axon	1	SIRT2,KCNAB2,DLG1,MAP2,EPB41L3,MAG,BIN1,MAPK8IP3,ANK3,MAP1A,MYO1D,KCNA2,MAPT,SCN8A	Neuron	Yes
0.00966	9	CC	8	GO:0098878	neurotransmitter receptor complex	1	CACNG3,DLG1,DLG3,ABHD12,GRIA2,PTK2B,GRIA3,CACNG8,SHANK2	Neurotransmitters	No
0.00966	9	CC	8	GO:0008328	ionotropic glutamate receptor complex	2	CACNG3,DLG1,DLG3,ABHD12,GRIA2,PTK2B,GRIA3,CACNG8,SHANK2	Neurotransmitters	Yes
0.00836	27	MF	3	GO:0008017	microtubule binding	1	PPP5C,CLASP1,CAMSAP3,MAP2,DNM1L,NEFH,KATNAL1,NEFM,FSD1,ARHGEF2,CAMSAP2,SGIP1,VAPB,KIF3A,MAP1B,PEX14,DYNC1I1,NDEL1,MAP1A,HOOK3,MAP6,MYO1D,MAP6D1,GAS2L1,MAPT,CHP1,OPA1	Rest	Yes
0.00641	14	MF	12	GO:0030276	clathrin binding	1	SYT7,SNAP91,PICALM,DNM1L,RPH3A,AP1B1,NCALD,SMAP1,CLINT1,BIN1,SYT2,SYT12,TOM1L2,AP2A1	Rest	Yes

## Sheet: FTD-MAPT higher expr prot
p-value	NumberProteins	GOtype	GOterm group	GOtermID	GOterm	tdepth	Proteinlist	GOGroup	BestPerParent?
0.00657	28	BP	2	GO:0033993	response to lipid	1	ATP1A2,TNC,MAOB,XRCC5,RPLP0,MAPK1,DDX17,ACSBG1,DDX5,CPT1A,PLSCR4,PADI2,RAN,ANXA1,PARP1,EGFR,MSN,GJA1,HNRNPU,PRKCA,SLC6A1,AGL,PMVK,CTNNB1,PRPF8,NQO1,RUVBL2,ADH5	Rest	No
0.0433	20	BP	2	GO:0071396	cellular response to lipid	1	ATP1A2,TNC,XRCC5,RPLP0,MAPK1,DDX17,DDX5,CPT1A,PLSCR4,PADI2,RAN,ANXA1,PARP1,EGFR,MSN,HNRNPU,PRKCA,CTNNB1,PRPF8,RUVBL2	Rest	Yes
0.021	37	BP	6	GO:0014070	response to organic cyclic compound	1	ATP1A2,TNC,CTNNA1,MAOB,FKBP1A,RPLP0,EZR,MAPK1,DDX17,ACSBG1,NAMPT,DDX5,CPT1A,PADI2,AKAP7,HNRNPA2B1,RAN,ANXA1,DHX9,ARHGDIA,EIF4A3,PARP1,EPHX1,EGFR,MSN,GJA1,HNRNPU,SLC16A1,SLC6A1,AGL,PEA15,PMVK,SLC3A2,CTNNB1,NQO1,RUVBL2,GSTM2	Rest	Yes
0.0499	22	BP	7	GO:0008380	RNA splicing	1	PTBP1,CLNS1A,HNRNPH3,SNRPD3,DDX17,DDX5,SRSF3,SRSF7,HNRNPA2B1,AHNAK,HNRNPA1,DHX9,SRSF1,PPIL1,EIF4A3,RBMX,HNRNPU,SNRPD1,HNRNPA3,PRPF8,SNRPE,SF3B3	RNA	No
0.00872	21	BP	7	GO:0000375	RNA splicing, via transesterification reactions	2	PTBP1,CLNS1A,HNRNPH3,SNRPD3,DDX17,DDX5,SRSF3,SRSF7,HNRNPA2B1,HNRNPA1,DHX9,SRSF1,PPIL1,EIF4A3,RBMX,HNRNPU,SNRPD1,HNRNPA3,PRPF8,SNRPE,SF3B3	RNA	No
0.00655	21	BP	7	GO:0000377	RNA splicing, via transesterification reactions with bulged adenosine as nucleophile	3	PTBP1,CLNS1A,HNRNPH3,SNRPD3,DDX17,DDX5,SRSF3,SRSF7,HNRNPA2B1,HNRNPA1,DHX9,SRSF1,PPIL1,EIF4A3,RBMX,HNRNPU,SNRPD1,HNRNPA3,PRPF8,SNRPE,SF3B3	RNA	Yes
0.0165	11	BP	7	GO:0043484	regulation of RNA splicing	2	PTBP1,DDX17,DDX5,SRSF3,SRSF7,HNRNPA2B1,AHNAK,HNRNPA1,SRSF1,RBMX,HNRNPU	RNA	Yes
0.00655	21	BP	7	GO:0000398	mRNA splicing, via spliceosome	1	PTBP1,CLNS1A,HNRNPH3,SNRPD3,DDX17,DDX5,SRSF3,SRSF7,HNRNPA2B1,HNRNPA1,DHX9,SRSF1,PPIL1,EIF4A3,RBMX,HNRNPU,SNRPD1,HNRNPA3,PRPF8,SNRPE,SF3B3	RNA	No
0.0165	8	BP	7	GO:0000380	alternative mRNA splicing, via spliceosome	2	PTBP1,DDX17,DDX5,HNRNPA1,DHX9,SRSF1,RBMX,HNRNPU	RNA	Yes
0.0125	10	BP	7	GO:0050684	regulation of mRNA processing	1	PTBP1,DDX17,DDX5,SRSF3,SRSF7,HNRNPA2B1,HNRNPA1,DHX9,RBMX,HNRNPU	RNA	No
0.0155	9	BP	7	GO:0048024	regulation of mRNA splicing, via spliceosome	2	PTBP1,DDX17,DDX5,SRSF3,SRSF7,HNRNPA2B1,HNRNPA1,RBMX,HNRNPU	RNA	Yes
0.00491	11	BP	1	GO:0006405	RNA export from nucleus	1	TPR,SRSF3,SRSF7,HNRNPA2B1,RAN,HNRNPA1,DHX9,SRSF1,EIF4A3,XPOT,NUP62	RNA	Yes
0.0197	32	BP	3	GO:0060429	epithelium development	1	VIM,CD44,VCL,TNC,WDR1,PHGDH,EZR,DSP,HNRNPH3,MAPK1,CALB1,RHEB,CPT1A,CNN3,TJP2,GNA13,GSTM3,ANXA1,FLNB,RDX,IQGAP1,EGFR,MSN,TAGLN,GJA1,CBR1,BDH2,CTNNB1,CDH2,LAMB2,FLNA,PRKDC	Tissue development	No
0.0193	22	BP	3	GO:0030855	epithelial cell differentiation	1	VIM,EZR,DSP,HNRNPH3,RHEB,CPT1A,CNN3,TJP2,GSTM3,ANXA1,FLNB,RDX,IQGAP1,MSN,TAGLN,GJA1,CBR1,BDH2,CTNNB1,CDH2,LAMB2,FLNA	Tissue development	Yes
0.00432	16	CC	4	GO:0005681	spliceosomal complex	1	HNRNPH3,SNRPD3,RHEB,DDX5,HNRNPA2B1,HNRNPA1,SRSF1,PPIL1,EIF4A3,RBMX,HNRNPU,SNRPD1,HNRNPA3,PRPF8,SNRPE,SF3B3	RNA	No
0.00286	14	CC	4	GO:0071013	catalytic step 2 spliceosome	2	SNRPD3,DDX5,HNRNPA2B1,HNRNPA1,SRSF1,PPIL1,EIF4A3,RBMX,HNRNPU,SNRPD1,HNRNPA3,PRPF8,SNRPE,SF3B3	RNA	Yes
0.0138	46	CC	5	GO:0070161	anchoring junction	1	FHL1,VIM,CD44,VCL,TNC,CTNNA1,CTNNA2,HACD3,RPLP0,SNAP23,EZR,DSP,MAPK1,RPS19,HSPB1,CD81,CNN3,TJP2,GNA13,LRP1,AHNAK,ANXA1,FLNB,TNS3,RDX,IQGAP1,EGFR,CASK,MSN,RSU1,ITGB1,GJA1,RPL30,CSRP1,PLPP3,CAPN2,PPIB,CTNNB1,STXBP6,ALCAM,CDH2,SNTB1,PLEC,CDC42EP4,PPIA,FLNA	Adhesion	No
0.0105	46	CC	5	GO:0005912	adherens junction	2	FHL1,VIM,CD44,VCL,TNC,CTNNA1,CTNNA2,HACD3,RPLP0,SNAP23,EZR,DSP,MAPK1,RPS19,HSPB1,CD81,CNN3,TJP2,GNA13,LRP1,AHNAK,ANXA1,FLNB,TNS3,RDX,IQGAP1,EGFR,CASK,MSN,RSU1,ITGB1,GJA1,RPL30,CSRP1,PLPP3,CAPN2,PPIB,CTNNB1,STXBP6,ALCAM,CDH2,SNTB1,PLEC,CDC42EP4,PPIA,FLNA	Adhesion	Yes
0.0472	40	CC	5	GO:0030055	cell-substrate junction	1	FHL1,VIM,CD44,VCL,TNC,CTNNA1,HACD3,RPLP0,SNAP23,EZR,MAPK1,RPS19,HSPB1,CD81,CNN3,GNA13,LRP1,AHNAK,ANXA1,FLNB,TNS3,RDX,IQGAP1,EGFR,CASK,MSN,RSU1,ITGB1,GJA1,RPL30,CSRP1,CAPN2,PPIB,CTNNB1,ALCAM,CDH2,SNTB1,PLEC,PPIA,FLNA	Adhesion	No
0.0472	40	CC	5	GO:0005924	cell-substrate adherens junction	2	FHL1,VIM,CD44,VCL,TNC,CTNNA1,HACD3,RPLP0,SNAP23,EZR,MAPK1,RPS19,HSPB1,CD81,CNN3,GNA13,LRP1,AHNAK,ANXA1,FLNB,TNS3,RDX,IQGAP1,EGFR,CASK,MSN,RSU1,ITGB1,GJA1,RPL30,CSRP1,CAPN2,PPIB,CTNNB1,ALCAM,CDH2,SNTB1,PLEC,PPIA,FLNA	Adhesion	No
0.0472	40	CC	5	GO:0005925	focal adhesion	3	FHL1,VIM,CD44,VCL,TNC,CTNNA1,HACD3,RPLP0,SNAP23,EZR,MAPK1,RPS19,HSPB1,CD81,CNN3,GNA13,LRP1,AHNAK,ANXA1,FLNB,TNS3,RDX,IQGAP1,EGFR,CASK,MSN,RSU1,ITGB1,GJA1,RPL30,CSRP1,CAPN2,PPIB,CTNNB1,ALCAM,CDH2,SNTB1,PLEC,PPIA,FLNA	Adhesion	Yes

## Sheet: FTD-MAPT lower expr prot
p-value	NumberProteins	GOtype	GOterm group	GOtermID	GOterm	tdepth	Proteinlist	GOGroup	BestPerParent?
0.0408	135	BP	9	GO:0032501	multicellular organismal process	1	AP2B1,MARK4,CD9,SYT7,EHD3,RUFY3,PLEKHB1,AP2S1,GPM6B,ROGDI,ATP2B3,SIRT2,KCNAB2,ADGRL1,ACTN1,MARK2,CLASP1,ADD2,TPD52,CAMSAP3,ACTN2,IGSF9B,EPB41L3,DLG3,TF,STX1B,AP1B1,NEFH,TIMM9,PLLP,NCALD,NEFM,MAG,STX1A,NCS1,LGI1,CNTNAP1,NECTIN1,WASF1,SNX4,ADAM23,RTN4,STAT1,HSPE1,STRN,EPHA4,ARHGEF2,HPCAL4,SLC8A2,SGIP1,GDA,RAD23B,GRIA2,PTK2B,GLIPR2,IFT81,PLP1,CPNE5,RAP2A,GRIA3,OMG,TIMM8A,VGF,APOE,OLFM1,DIAPH1,MAP1B,…	Rest	No
0.046	69	BP	9	GO:0051239	regulation of multicellular organismal process	2	AP2B1,CD9,SYT7,EHD3,RUFY3,AP2S1,GPM6B,ATP2B3,SIRT2,ADGRL1,MARK2,CLASP1,IGSF9B,TF,STX1B,MAG,STX1A,NCS1,NECTIN1,SNX4,RTN4,STAT1,EPHA4,ARHGEF2,SLC8A2,PTK2B,GLIPR2,CPNE5,RAP2A,OMG,APOE,OLFM1,MAP1B,BIN1,PPP3CA,KATNB1,SH3GL1,ATP1B1,SNCA,PIK3R1,SCN2B,CAMK4,CACNA2D1,THY1,ATP2B2,DMTN,SYNJ1,MAP2K1,PRKCE,CLSTN1,PRNP,NEGR1,KCNA2,MYADM,PLCB1,CNTN2,HGS,RTN4RL2,APOD,AP2A1,SYNGAP1,DNM3,MBP,SCAMP5,BAG6,PLXNA4,GPX…	Rest	Yes
0.0322	56	BP	3	GO:0007010	cytoskeleton organization	1	MARK4,RUFY3,GPM6B,PPP1R12A,ACTN1,MARK2,CLASP1,ADD2,CAMSAP3,ACTN2,EPB41L3,TF,NEFH,NEFM,TUBB4A,CNTNAP1,PHACTR1,WASF1,ARHGEF2,PTK2B,TUBA1B,RAP2A,APOE,ACTN4,DIAPH1,MAP1B,KRAS,ERMN,BIN1,TUBB2A,ABI2,KATNB1,SNCA,PIK3R1,ARHGAP26,INA,ALDOA,ANK3,THY1,DMTN,ABLIM2,JAM3,MAP1A,PRKCE,MAP6,SYNPO,CNP,TUBB6,MYADM,MAP6D1,TUBA8,CNTN2,PIP5K1C,TUBB4B,TUBB,NEFL	Rest	Yes
0.00171	38	BP	5	GO:0050877	nervous system process	1	KCNAB2,IGSF9B,STX1B,TIMM9,MAG,STX1A,CNTNAP1,SLC8A2,GRIA2,PTK2B,GRIA3,APOE,DIAPH1,KRAS,CHL1,SCN2A,PPP3CA,SH3GL1,SNCA,ANK3,CAMK4,SLC24A2,ATP2B2,SYNJ1,NFASC,JAM3,MAP1A,PRRT2,PRNP,SYNPO,PITPNA,KCNA2,PLCB1,CNTN2,SYNGAP1,MBP,GPX1,NEFL	Neuron	Yes
0.00135	84	BP	6	GO:0007399	nervous system development	1	MARK4,CD9,RUFY3,GPM6B,ROGDI,SIRT2,ADGRL1,MARK2,CAMSAP3,IGSF9B,EPB41L3,DLG3,STX1B,NEFH,PLLP,NEFM,MAG,NCS1,LGI1,CNTNAP1,NECTIN1,WASF1,ADAM23,RTN4,STRN,EPHA4,ARHGEF2,HPCAL4,GDA,PTK2B,PLP1,CPNE5,RAP2A,OMG,TIMM8A,APOE,OLFM1,MAP1B,HAPLN2,KRAS,CHL1,DBNL,SCN2A,BIN1,PPP3CA,KATNB1,SH3GL1,SLC4A10,SNCA,PIK3R1,ARHGAP26,INA,SCN2B,HNMT,ANK3,THY1,ATP2B2,SYNJ1,IGSF8,NFASC,JAM3,MOBP,MAP2K1,TMEM126A,MAP6,CLSTN1,NEG…	Neuron	Yes
0.0275	62	BP	1	GO:0030030	cell projection organization	1	MARK4,EHD3,NUDCD3,RUFY3,MARK2,CLASP1,CAMSAP3,ACTN2,EPB41L3,STX1B,NEFH,NEFM,TUBB4A,MAG,NCS1,LGI1,CNTNAP1,NECTIN1,WASF1,RTN4,STRN,EPHA4,PTK2B,IFT81,PLP1,CPNE5,RAP2A,OMG,APOE,OLFM1,MAP1B,CHL1,DBNL,ERMN,PPP3CA,KATNB1,MIEN1,PIK3R1,ANK3,THY1,DMTN,NFASC,JAM3,MAP1A,MAP2K1,MAP6,PRNP,NEGR1,CNP,PITPNA,MAP6D1,CNTN2,RTN4RL2,TUBB4B,APOD,TUBB,AP2A1,SYNGAP1,DNM3,ATL1,PLXNA4,NEFL	Neuron	No
0.041	61	BP	1	GO:0120036	plasma membrane bounded cell projection organization	2	MARK4,EHD3,NUDCD3,RUFY3,MARK2,CLASP1,CAMSAP3,ACTN2,EPB41L3,STX1B,NEFH,NEFM,TUBB4A,MAG,NCS1,LGI1,CNTNAP1,NECTIN1,WASF1,RTN4,STRN,EPHA4,PTK2B,IFT81,PLP1,CPNE5,RAP2A,OMG,APOE,OLFM1,MAP1B,CHL1,DBNL,PPP3CA,KATNB1,MIEN1,PIK3R1,ANK3,THY1,DMTN,NFASC,JAM3,MAP1A,MAP2K1,MAP6,PRNP,NEGR1,CNP,PITPNA,MAP6D1,CNTN2,RTN4RL2,TUBB4B,APOD,TUBB,AP2A1,SYNGAP1,DNM3,ATL1,PLXNA4,NEFL	Neuron	Yes
0.0441	38	BP	10	GO:0098916	anterograde trans-synaptic signaling	1	SYT7,SNCB,AMPH,IGSF9B,DLG3,STX1B,SYNGR1,STX1A,LGI1,EPHA4,SLC8A2,GRIA2,PTK2B,PLP1,GRIA3,VGF,APOE,KRAS,PPP3CA,SH3GL1,SNCA,SCN2B,SLC24A2,SYNJ1,MAP1A,PRRT2,CPLX1,PRKCE,CLSTN1,PRNP,SYNPO,SNCG,CNP,CNTN2,SYN3,PIP5K1C,SYNGAP1,MBP	Synapse	No
0.0441	38	BP	10	GO:0007268	chemical synaptic transmission	2	SYT7,SNCB,AMPH,IGSF9B,DLG3,STX1B,SYNGR1,STX1A,LGI1,EPHA4,SLC8A2,GRIA2,PTK2B,PLP1,GRIA3,VGF,APOE,KRAS,PPP3CA,SH3GL1,SNCA,SCN2B,SLC24A2,SYNJ1,MAP1A,PRRT2,CPLX1,PRKCE,CLSTN1,PRNP,SYNPO,SNCG,CNP,CNTN2,SYN3,PIP5K1C,SYNGAP1,MBP	Synapse	Yes
0.0317	16	CC	8	GO:1990351	transporter complex	1	KCNAB2,DLG3,TIMM9,STX1A,CNTNAP1,GRIA2,PTK2B,GRIA3,DPP6,SCN2A,ATP1B1,SCN2B,CACNA2D1,DPP10,KCNA2,CNTN2	Ion transport	Yes
0.0101	25	CC	2	GO:0098984	neuron to neuron synapse	1	KCNAB2,ADD2,IGSF9B,EPB41L3,DLG3,NEFH,STX1A,NCS1,RTN4,STRN,EPHA4,ARHGEF2,DNAJC6,PTK2B,MAP1B,DBNL,SH3GL1,DMTN,PRRT2,CLSTN1,PRNP,SYNPO,SYN3,SYNGAP1,DNM3	Synapse	No
0.0212	24	CC	2	GO:0032279	asymmetric synapse	2	KCNAB2,ADD2,IGSF9B,EPB41L3,DLG3,NEFH,STX1A,NCS1,RTN4,STRN,EPHA4,ARHGEF2,DNAJC6,PTK2B,MAP1B,DBNL,DMTN,PRRT2,CLSTN1,PRNP,SYNPO,SYN3,SYNGAP1,DNM3	Synapse	Yes
0.0308	79	CC	2	GO:0097458	neuron part	1	MARK4,SYT7,RUFY3,ROGDI,SIRT2,KCNAB2,ADGRL1,MARK2,ADD2,ACTN2,AMPH,IGSF9B,EPB41L3,DLG3,STX1B,NEFH,SYNGR1,EEA1,AP3B2,NEFM,TUBB4A,MAG,STX1A,NCS1,CNTNAP1,NECTIN1,SLC30A3,RTN4,STAT1,STRN,EPHA4,ARHGEF2,DNAJC6,SLC8A2,GRIA2,PTK2B,CPNE5,APOE,ACTN4,OLFM1,MAP1B,CHL1,DBNL,SCN2A,ERMN,BIN1,PPP3CA,KATNB1,SLC4A10,SNCA,HNMT,ANK3,QDPR,THY1,DMTN,SYNJ1,NFASC,MAP1A,PRRT2,LGI3,CPLX1,MAP6,CLSTN1,PRNP,SYNPO,SNCG,KCNA2,CN…	Neuron	No
0.0145	48	CC	2	GO:0036477	somatodendritic compartment	2	MARK4,SYT7,RUFY3,ROGDI,SIRT2,MARK2,ACTN2,IGSF9B,DLG3,TUBB4A,NCS1,NECTIN1,RTN4,STAT1,STRN,EPHA4,ARHGEF2,SLC8A2,GRIA2,PTK2B,CPNE5,APOE,OLFM1,MAP1B,CHL1,DBNL,ERMN,PPP3CA,KATNB1,SLC4A10,SNCA,ANK3,THY1,NFASC,MAP1A,PRRT2,CPLX1,MAP6,PRNP,SYNPO,SNCG,KCNA2,CNTN2,RTN4RL2,APOD,SYNGAP1,DNM3,MBP	Neuron	Yes
0.0153	64	CC	2	GO:0044463	cell projection part	1	MARK4,SYT7,EHD3,RUFY3,ROGDI,SIRT2,KCNAB2,ADGRL1,MARK2,ACTN2,IGSF9B,EPB41L3,DLG3,EEA1,AP3B2,TUBB4A,MAG,NCS1,CNTNAP1,NECTIN1,RTN4,STAT1,STRN,EPHA4,ARHGEF2,SLC8A2,GRIA2,PTK2B,IFT81,APOE,OLFM1,DIAPH1,MAP1B,CHL1,DBNL,SCN2A,ERMN,BIN1,ABI2,PPP3CA,KATNB1,SLC4A10,SNCA,ANK3,THY1,DMTN,SYNJ1,NFASC,MAP1A,PRRT2,CPLX1,MAP6,PRNP,SYNPO,KCNA2,CNTN2,PIP5K1C,RTN4RL2,APOD,AP2A1,SYNGAP1,DNM3,MBP,NEFL	Neuron	No
0.0153	64	CC	2	GO:0120038	plasma membrane bounded cell projection part	2	MARK4,SYT7,EHD3,RUFY3,ROGDI,SIRT2,KCNAB2,ADGRL1,MARK2,ACTN2,IGSF9B,EPB41L3,DLG3,EEA1,AP3B2,TUBB4A,MAG,NCS1,CNTNAP1,NECTIN1,RTN4,STAT1,STRN,EPHA4,ARHGEF2,SLC8A2,GRIA2,PTK2B,IFT81,APOE,OLFM1,DIAPH1,MAP1B,CHL1,DBNL,SCN2A,ERMN,BIN1,ABI2,PPP3CA,KATNB1,SLC4A10,SNCA,ANK3,THY1,DMTN,SYNJ1,NFASC,MAP1A,PRRT2,CPLX1,MAP6,PRNP,SYNPO,KCNA2,CNTN2,PIP5K1C,RTN4RL2,APOD,AP2A1,SYNGAP1,DNM3,MBP,NEFL	Neuron	Yes
0.0212	24	CC	2	GO:0099572	postsynaptic specialization	1	KCNAB2,ADD2,IGSF9B,EPB41L3,DLG3,NEFH,STX1A,NCS1,RTN4,STRN,EPHA4,ARHGEF2,DNAJC6,PTK2B,MAP1B,DBNL,DMTN,PRRT2,CLSTN1,PRNP,SYNPO,SYN3,SYNGAP1,DNM3	Synapse	No
0.0212	24	CC	2	GO:0014069	postsynaptic density	2	KCNAB2,ADD2,IGSF9B,EPB41L3,DLG3,NEFH,STX1A,NCS1,RTN4,STRN,EPHA4,ARHGEF2,DNAJC6,PTK2B,MAP1B,DBNL,DMTN,PRRT2,CLSTN1,PRNP,SYNPO,SYN3,SYNGAP1,DNM3	Synapse	Yes
0.00429	69	CC	2	GO:0043005	neuron projection	1	MARK4,SYT7,RUFY3,ROGDI,SIRT2,KCNAB2,ADGRL1,MARK2,ACTN2,IGSF9B,EPB41L3,DLG3,STX1B,NEFH,EEA1,AP3B2,NEFM,TUBB4A,MAG,STX1A,NCS1,CNTNAP1,NECTIN1,SLC30A3,RTN4,STAT1,STRN,EPHA4,ARHGEF2,SLC8A2,GRIA2,PTK2B,CPNE5,APOE,ACTN4,OLFM1,MAP1B,CHL1,DBNL,SCN2A,ERMN,BIN1,PPP3CA,KATNB1,SLC4A10,SNCA,HNMT,ANK3,QDPR,THY1,SYNJ1,NFASC,MAP1A,PRRT2,LGI3,CPLX1,MAP6,PRNP,SYNPO,SNCG,KCNA2,CNTN2,RTN4RL2,APOD,SYNGAP1,DNM3,MBP,AT…	Axon	No
0.00335	45	CC	2	GO:0030424	axon	2	SYT7,RUFY3,ROGDI,SIRT2,KCNAB2,ADGRL1,EPB41L3,DLG3,STX1B,NEFH,EEA1,AP3B2,NEFM,TUBB4A,MAG,STX1A,NCS1,CNTNAP1,NECTIN1,RTN4,STAT1,EPHA4,PTK2B,OLFM1,MAP1B,SCN2A,ERMN,BIN1,KATNB1,SNCA,ANK3,THY1,SYNJ1,NFASC,MAP1A,PRRT2,MAP6,SNCG,KCNA2,CNTN2,RTN4RL2,DNM3,MBP,ATL1,NEFL	Axon	Yes
0.0148	32	CC	2	GO:0033267	axon part	3	SYT7,RUFY3,SIRT2,KCNAB2,ADGRL1,EPB41L3,DLG3,EEA1,AP3B2,TUBB4A,MAG,CNTNAP1,NECTIN1,RTN4,EPHA4,PTK2B,OLFM1,SCN2A,ERMN,BIN1,KATNB1,SNCA,ANK3,THY1,SYNJ1,NFASC,MAP1A,PRRT2,KCNA2,CNTN2,MBP,NEFL	Axon	No
2.08e-05	16	CC	2	GO:0044304	main axon	4	SIRT2,KCNAB2,EPB41L3,TUBB4A,MAG,CNTNAP1,SCN2A,ERMN,BIN1,ANK3,THY1,NFASC,MAP1A,KCNA2,CNTN2,MBP	Axon	Yes
0.0392	5	CC	2	GO:0033268	node of Ranvier	4	SCN2A,BIN1,ANK3,NFASC,CNTN2	Axon	No
0.000578	7	CC	2	GO:0033270	paranode region of axon	4	SIRT2,EPB41L3,MAG,CNTNAP1,SCN2A,ERMN,NFASC	Axon	Yes
0.0406	14	CC	4	GO:0034702	ion channel complex	1	KCNAB2,DLG3,STX1A,CNTNAP1,GRIA2,PTK2B,GRIA3,DPP6,SCN2A,SCN2B,CACNA2D1,DPP10,KCNA2,CNTN2	Ion transport	No
0.00158	14	CC	4	GO:0034703	cation channel complex	2	KCNAB2,DLG3,STX1A,CNTNAP1,GRIA2,PTK2B,GRIA3,DPP6,SCN2A,SCN2B,CACNA2D1,DPP10,KCNA2,CNTN2	Ion transport	Yes
0.038	120	CC	7	GO:0071944	cell periphery	1	AP2B1,CD9,SYT7,EHD3,AP2S1,GPM6B,SLC12A2,SNAP91,ROGDI,ATP2B3,SIRT2,KCNAB2,SLC44A1,ADGRL1,ACTN1,MARK2,CLASP1,ADD2,ACTN2,AMPH,TOLLIP,STX7,IGSF9B,EPB41L3,DLG3,TF,STX1B,SYNGR1,EEA1,MAG,STX1A,NCS1,CNTNAP1,NECTIN1,MADD,SNX4,ADAM23,SLC30A3,RTN4,STRN,EPHA4,ARHGEF2,SLC8A2,SGIP1,GRIA2,CYSTM1,PTK2B,PLP1,RAP2A,GRIA3,OMG,APOE,DPP6,ACTN4,DIAPH1,MAP1B,PTPRE,RTN3,KRAS,CHL1,DBNL,SCN2A,ERMN,BIN1,PPP3CA,KIF21A,ESYT1…	Plasma membrane	No
0.0431	116	CC	7	GO:0005886	plasma membrane	2	AP2B1,CD9,SYT7,EHD3,AP2S1,GPM6B,SLC12A2,SNAP91,ROGDI,ATP2B3,SIRT2,KCNAB2,SLC44A1,ADGRL1,ACTN1,MARK2,ADD2,ACTN2,AMPH,TOLLIP,STX7,IGSF9B,EPB41L3,DLG3,TF,STX1B,SYNGR1,EEA1,MAG,STX1A,NCS1,CNTNAP1,NECTIN1,MADD,SNX4,ADAM23,SLC30A3,RTN4,STRN,EPHA4,ARHGEF2,SLC8A2,SGIP1,GRIA2,CYSTM1,PTK2B,PLP1,RAP2A,GRIA3,OMG,APOE,DPP6,DIAPH1,MAP1B,PTPRE,RTN3,KRAS,CHL1,DBNL,SCN2A,BIN1,PPP3CA,KIF21A,ESYT1,KATNB1,MIEN1,ATP1…	Plasma membrane	Yes
