# Supplementary material for: Distinct cell type-specific protein signatures in GRN and MAPT genetic subtypes of frontotemporal dementia
Source: Acta Neuropathol Commun. 2022 Jul 7;10:100. doi: 10.1186/s40478-022-01387-8 (PMC9261008; doi:10.1186/s40478-022-01387-8)
Supplement: Supplementary file 7 — Additional file 7 Lists of SynGO enrichment analysis results for proteins differentially expressed in frontal cortical FTD-GRN vs NDC and temporal cortical FTD-MAPT vs NDC. SynGO enrichment analysis was performed on proteins differentially expressed at q < 0.05, with proteins divided into lower and higher expressed proteins. For every SynGO term, the proteins within that term that were measured in the different FTD subtypes are given, as well the raw and multiple testing corrected p-value for the enrichment analysis. [file 40478_2022_1387_MOESM7_ESM.xlsx]

## Sheet: Info
Distinct cell type-specific protein signatures in GRN and MAPT genetic subtypes of frontotemporal dementia
Additional File 7 Lists of SynGO enrichment analysis results for proteins differentially expressed (at q < 0.05) in frontal cortical FTD-GRN and temporal cortical FTD-MAPT vs NDC, divided into lower and higher expressed proteins. For every SynGO term, the proteins within that term that were measured in the different FTD subtypes are given, as well the raw and multiple testing corrected p-value fo…

## Sheet: FTD-GRN higher expr prot
GO term ID	user interface reference code	GO domain	GO term name	GO term name - hierarchical structure	GO parent term ID	GSEA p-value	GSEA 'gene cluster' FDR corrected p-value	genes - hgnc_id	genes - hgnc_symbol	genes - your genelist input
GO:0045202		CC	synapse	synapse		0.973439	0.997254	HGNC:329;HGNC:10325;HGNC:10334;HGNC:10922;HGNC:3711;HGNC:2464;HGNC:21100;HGNC:1435;HGNC:678;HGNC:380;HGNC:533;HGNC:6153;HGNC:1426;HGNC:8882;HGNC:8881;HGNC:245;HGNC:22192;HGNC:9393;HGNC:2510;HGNC:2514;HGNC:7605;HGNC:543;HGNC:11507;HGNC:16507;HGNC:6499;HGNC:2171;HGNC:1759;HGNC:7656;HGNC:11131;HGNC:3754;HGNC:13759;HGNC:11275;HGNC:24941;HGNC:8032;HGNC:1441;HGNC:2157;HGNC:18415;HGNC:11273;HGNC:6871;HG…	AGRN;RPL24;RPL31;SLC16A1;FKBP1A;VCAN;QKI;CALB2;ARHGDIA;AKR1A1;ANXA1;ITGB1;CADPS;PFN2;PFN1;ADD3;SCRN1;PRKCA;CTNNA2;CTNNB1;MYO6;ANXA5;SYPL1;SYNPR;LAMP1;CNTN1;CDH2;NCAM1;SNAP23;FLNA;CYFIP1;SPTBN1;HNRNPA3;NTRK2;CALD1;CNN3;HIP1R;SPTAN1;MAPK1;GRID1;NRCAM;FARP1;BCAN;TNC	AGRN;RPL24;RPL31;SLC16A1;FKBP1A;VCAN;QKI;CALB2;ARHGDIA;AKR1A1;ANXA1;ITGB1;CAPS;PFN2;PFN1;ADD3;SCRN1;PRKCA;CTNNA2;CTNNB1;MYO6;ANXA5;SYPL1;SYNPR;LAMP1;CNTN1;CDH2;NCAM1;SNAP23;FLNA;CYFIP1;SPTBN1;HNRNPA3;NTRK2;CALD1;CNN3;HIP1R;SPTAN1;MAPK1;GLUD1;NRCAM;FARP1;BCAN;TNC
GO:0097060	A1	CC	synaptic membrane	├─ synaptic membrane	GO:0045202			HGNC:533;HGNC:6153	ANXA1;ITGB1	ANXA1;ITGB1
GO:0099243	A2	CC	extrinsic component of synaptic membrane	│ ├─ extrinsic component of synaptic membrane	GO:0097060
GO:0099699	A3	CC	integral component of synaptic membrane	│ └─ integral component of synaptic membrane	GO:0097060			HGNC:6153	ITGB1	ITGB1
GO:0098793	B1	CC	presynapse	├─ presynapse	GO:0045202	0.997254	0.997254	HGNC:1426;HGNC:8882;HGNC:8881;HGNC:245;HGNC:22192;HGNC:9393;HGNC:2510;HGNC:2514;HGNC:7605;HGNC:543;HGNC:11507;HGNC:16507;HGNC:6499;HGNC:2171;HGNC:1759;HGNC:7656;HGNC:10325	CADPS;PFN2;PFN1;ADD3;SCRN1;PRKCA;CTNNA2;CTNNB1;MYO6;ANXA5;SYPL1;SYNPR;LAMP1;CNTN1;CDH2;NCAM1;RPL24	CAPS;PFN2;PFN1;ADD3;SCRN1;PRKCA;CTNNA2;CTNNB1;MYO6;ANXA5;SYPL1;SYNPR;LAMP1;CNTN1;CDH2;NCAM1;RPL24
GO:0099523	B2	CC	presynaptic cytosol	│ ├─ presynaptic cytosol	GO:0098793			HGNC:9393	PRKCA	PRKCA
GO:0099569	B3	CC	presynaptic cytoskeleton	│ ├─ presynaptic cytoskeleton	GO:0098793
GO:0099182	B12	CC	presynaptic intermediate filament cytoskeleton	│ │ ├─ presynaptic intermediate filament cytoskeleton	GO:0099569
GO:0099143	B13	CC	presynaptic actin cytoskeleton	│ │ └─ presynaptic actin cytoskeleton	GO:0099569
GO:0048786	B4	CC	presynaptic active zone	│ ├─ presynaptic active zone	GO:0098793			HGNC:2510;HGNC:2514	CTNNA2;CTNNB1	CTNNA2;CTNNB1
GO:0098831	B14	CC	presynaptic active zone cytoplasmic component	│ │ ├─ presynaptic active zone cytoplasmic component	GO:0048786			HGNC:2510;HGNC:2514	CTNNA2;CTNNB1	CTNNA2;CTNNB1
GO:0048787	B15	CC	presynaptic active zone membrane	│ │ └─ presynaptic active zone membrane	GO:0048786
GO:0099029	B27	CC	anchored component of presynaptic active zone membrane	│ │ ├─ anchored component of presynaptic active zone membrane	GO:0048787
GO:0098891	B28	CC	extrinsic component of presynaptic active zone membrane	│ │ ├─ extrinsic component of presynaptic active zone membrane	GO:0048787
GO:0099059	B29	CC	integral component of presynaptic active zone membrane	│ │ └─ integral component of presynaptic active zone membrane	GO:0048787
GO:0098833	B5	CC	presynaptic endocytic zone	│ ├─ presynaptic endocytic zone	GO:0098793			HGNC:7605	MYO6	MYO6
GO:0098835	B16	CC	presynaptic endocytic zone membrane	│ │ └─ presynaptic endocytic zone membrane	GO:0098833
GO:0098894	B30	CC	extrinsic component of presynaptic endocytic zone membrane	│ │ └─ extrinsic component of presynaptic endocytic zone membrane	GO:0098835
GO:0098830	B6	CC	presynaptic endosome	│ ├─ presynaptic endosome	GO:0098793
GO:0098954	B17	CC	presynaptic endosome membrane	│ │ └─ presynaptic endosome membrane	GO:0098830
GO:0099067	B31	CC	integral component of presynaptic endosome membrane	│ │ └─ integral component of presynaptic endosome membrane	GO:0098954
GO:0008021	B7	CC	synaptic vesicle	│ ├─ synaptic vesicle	GO:0098793	0.969848		HGNC:543;HGNC:11507;HGNC:16507;HGNC:6499	ANXA5;SYPL1;SYNPR;LAMP1	ANXA5;SYPL1;SYNPR;LAMP1
GO:0034592	B18	CC	synaptic vesicle lumen	│ │ ├─ synaptic vesicle lumen	GO:0008021
GO:0030672	B19	CC	synaptic vesicle membrane	│ │ └─ synaptic vesicle membrane	GO:0008021	0.932024	0.997254	HGNC:543;HGNC:11507;HGNC:16507;HGNC:6499	ANXA5;SYPL1;SYNPR;LAMP1	ANXA5;SYPL1;SYNPR;LAMP1
GO:0098993	B32	CC	anchored component of synaptic vesicle membrane	│ │ ├─ anchored component of synaptic vesicle membrane	GO:0030672
GO:0098850	B33	CC	extrinsic component of synaptic vesicle membrane	│ │ ├─ extrinsic component of synaptic vesicle membrane	GO:0030672
GO:0030285	B34	CC	integral component of synaptic vesicle membrane	│ │ └─ integral component of synaptic vesicle membrane	GO:0030672	0.588452	0.997254	HGNC:11507;HGNC:16507;HGNC:6499	SYPL1;SYNPR;LAMP1	SYPL1;SYNPR;LAMP1
GO:0098992	B8	CC	neuronal dense core vesicle	│ ├─ neuronal dense core vesicle	GO:0098793			HGNC:1426	CADPS	CAPS
GO:0099013	B20	CC	neuronal dense core vesicle lumen	│ │ ├─ neuronal dense core vesicle lumen	GO:0098992
GO:0099012	B21	CC	neuronal dense core vesicle membrane	│ │ └─ neuronal dense core vesicle membrane	GO:0098992			HGNC:1426	CADPS	CAPS
GO:0098674	B35	CC	extrinsic component of neuronal dense core vesicle membrane	│ │ ├─ extrinsic component of neuronal dense core vesicle membrane	GO:0099012			HGNC:1426	CADPS	CAPS
GO:0099066	B36	CC	integral component of neuronal dense core vesicle membrane	│ │ └─ integral component of neuronal dense core vesicle membrane	GO:0099012
GO:0042734	B9	CC	presynaptic membrane	│ ├─ presynaptic membrane	GO:0098793	0.509528	0.997254	HGNC:2514;HGNC:2171;HGNC:2510;HGNC:1759;HGNC:7656	CTNNB1;CNTN1;CTNNA2;CDH2;NCAM1	CTNNB1;CNTN1;CTNNA2;CDH2;NCAM1
GO:0099026	B22	CC	anchored component of presynaptic membrane	│ │ ├─ anchored component of presynaptic membrane	GO:0042734			HGNC:2171	CNTN1	CNTN1
GO:0098888	B23	CC	extrinsic component of presynaptic membrane	│ │ ├─ extrinsic component of presynaptic membrane	GO:0042734			HGNC:2510	CTNNA2	CTNNA2
GO:0099056	B24	CC	integral component of presynaptic membrane	│ │ └─ integral component of presynaptic membrane	GO:0042734			HGNC:1759;HGNC:7656	CDH2;NCAM1	CDH2;NCAM1
SYNGO:presyn_ribosome	B10	CC	presynaptic ribosome	│ ├─ presynaptic ribosome	GO:0098793			HGNC:10325	RPL24	RPL24
SYNGO:presyn_er	B11	CC	presynaptic ER	│ └─ presynaptic ER	GO:0098793
SYNGO:presyn_er_membrane	B25	CC	presynaptic ER membrane	│ ├─ presynaptic ER membrane	SYNGO:presyn_er
SYNGO:presyn_er_membrane_integral	B37	CC	integral component of presynaptic ER membrane	│ │ └─ integral component of presynaptic ER membrane	SYNGO:presyn_er_membrane
SYNGO:presyn_ser	B26	CC	presynaptic SER	│ └─ presynaptic SER	SYNGO:presyn_er
SYNGO:presyn_ser_membrane	B38	CC	presynaptic SER membrane	│ └─ presynaptic SER membrane	SYNGO:presyn_ser
SYNGO:presyn_ser_membrane_integral	B39	CC	integral component of presynaptic SER membrane	│ └─ integral component of presynaptic SER membrane	SYNGO:presyn_ser_membrane
GO:0043083	C1	CC	synaptic cleft	├─ synaptic cleft	GO:0045202			HGNC:329	AGRN	AGRN
GO:0098965	C2	CC	extracellular matrix of synaptic cleft	│ └─ extracellular matrix of synaptic cleft	GO:0043083			HGNC:329	AGRN	AGRN
GO:0098794	D1	CC	postsynapse	├─ postsynapse	GO:0045202	0.787793	0.997254	HGNC:11131;HGNC:3754;HGNC:13759;HGNC:8882;HGNC:8881;HGNC:11275;HGNC:24941;HGNC:8032;HGNC:245;HGNC:1441;HGNC:2157;HGNC:18415;HGNC:11273;HGNC:7605;HGNC:6871;HGNC:2510;HGNC:2514;HGNC:4575;HGNC:7994;HGNC:2171;HGNC:3591;HGNC:1759;HGNC:6153;HGNC:7656;HGNC:10325;HGNC:10334	SNAP23;FLNA;CYFIP1;PFN2;PFN1;SPTBN1;HNRNPA3;NTRK2;ADD3;CALD1;CNN3;HIP1R;SPTAN1;MYO6;MAPK1;CTNNA2;CTNNB1;GRID1;NRCAM;CNTN1;FARP1;CDH2;ITGB1;NCAM1;RPL24;RPL31	SNAP23;FLNA;CYFIP1;PFN2;PFN1;SPTBN1;HNRNPA3;NTRK2;ADD3;CALD1;CNN3;HIP1R;SPTAN1;MYO6;MAPK1;CTNNA2;CTNNB1;GLUD1;NRCAM;CNTN1;FARP1;CDH2;ITGB1;NCAM1;RPL24;RPL31
GO:0099524	D2	CC	postsynaptic cytosol	│ ├─ postsynaptic cytosol	GO:0098794
GO:0099571	D3	CC	postsynaptic cytoskeleton	│ ├─ postsynaptic cytoskeleton	GO:0098794			HGNC:7605	MYO6	MYO6
GO:0099160	D12	CC	postsynaptic intermediate filament cytoskeleton	│ │ ├─ postsynaptic intermediate filament cytoskeleton	GO:0099571
GO:0098871	D13	CC	postsynaptic actin cytoskeleton	│ │ ├─ postsynaptic actin cytoskeleton	GO:0099571			HGNC:7605	MYO6	MYO6
GO:0150050	D14	CC	postsynaptic septin cytoskeleton	│ │ ├─ postsynaptic septin cytoskeleton	GO:0099571
GO:0099189	D15	CC	postsynaptic spectrin-associated cytoskeleton	│ │ └─ postsynaptic spectrin-associated cytoskeleton	GO:0099571
GO:0097444	D4	CC	spine apparatus	│ ├─ spine apparatus	GO:0098794
GO:0098897	D16	CC	spine apparatus membrane	│ │ └─ spine apparatus membrane	GO:0097444
GO:0099065	D30	CC	integral component of spine apparatus membrane	│ │ └─ integral component of spine apparatus membrane	GO:0098897
GO:0150051	D5	CC	postsynaptic Golgi apparatus	│ ├─ postsynaptic Golgi apparatus	GO:0098794
GO:0099572	D6	CC	postsynaptic specialization	│ ├─ postsynaptic specialization	GO:0098794	0.971845		HGNC:7605;HGNC:6871;HGNC:24941;HGNC:2510;HGNC:2514;HGNC:4575;HGNC:7994	MYO6;MAPK1;HNRNPA3;CTNNA2;CTNNB1;GRID1;NRCAM	MYO6;MAPK1;HNRNPA3;CTNNA2;CTNNB1;GLUD1;NRCAM
GO:0099091	D17	CC	postsynaptic specialization, intracellular component	│ │ ├─ postsynaptic specialization, intracellular component	GO:0099572
GO:0099634	D18	CC	postsynaptic specialization membrane	│ │ ├─ postsynaptic specialization membrane	GO:0099572
GO:0098892	D31	CC	extrinsic component of postsynaptic specialization membrane	│ │ │ ├─ extrinsic component of postsynaptic specialization membrane	GO:0099634
GO:0099060	D32	CC	integral component of postsynaptic specialization membrane	│ │ │ └─ integral component of postsynaptic specialization membrane	GO:0099634
GO:0014069	D19	CC	postsynaptic density	│ │ ├─ postsynaptic density	GO:0099572	0.943854	0.997254	HGNC:7605;HGNC:6871;HGNC:24941;HGNC:2510;HGNC:2514;HGNC:4575;HGNC:7994	MYO6;MAPK1;HNRNPA3;CTNNA2;CTNNB1;GRID1;NRCAM	MYO6;MAPK1;HNRNPA3;CTNNA2;CTNNB1;GLUD1;NRCAM
GO:0099092	D33	CC	postsynaptic density, intracellular component	│ │ │ ├─ postsynaptic density, intracellular component	GO:0014069			HGNC:2510;HGNC:2514	CTNNA2;CTNNB1	CTNNA2;CTNNB1
GO:0098839	D34	CC	postsynaptic density membrane	│ │ │ └─ postsynaptic density membrane	GO:0014069			HGNC:4575;HGNC:7994	GRID1;NRCAM	GLUD1;NRCAM
GO:0099031	D40	CC	anchored component of postsynaptic density membrane	│ │ │ ├─ anchored component of postsynaptic density membrane	GO:0098839
GO:0099147	D41	CC	extrinsic component of postsynaptic density membrane	│ │ │ ├─ extrinsic component of postsynaptic density membrane	GO:0098839
GO:0099061	D42	CC	integral component of postsynaptic density membrane	│ │ │ └─ integral component of postsynaptic density membrane	GO:0098839			HGNC:4575;HGNC:7994	GRID1;NRCAM	GLUD1;NRCAM
GO:0099629	D20	CC	postsynaptic specialization of symmetric synapse	│ │ └─ postsynaptic specialization of symmetric synapse	GO:0099572
GO:0098843	D7	CC	postsynaptic endocytic zone	│ ├─ postsynaptic endocytic zone	GO:0098794
GO:0098844	D21	CC	postsynaptic endocytic zone membrane	│ │ └─ postsynaptic endocytic zone membrane	GO:0098843
GO:0098845	D8	CC	postsynaptic endosome	│ ├─ postsynaptic endosome	GO:0098794
GO:0098895	D22	CC	postsynaptic endosome membrane	│ │ ├─ postsynaptic endosome membrane	GO:0098845
GO:0098999	D35	CC	extrinsic component of postsynaptic endosome membrane	│ │ │ └─ extrinsic component of postsynaptic endosome membrane	GO:0098895
GO:0098842	D23	CC	postsynaptic early endosome	│ │ ├─ postsynaptic early endosome	GO:0098845
GO:0098896	D36	CC	postsynaptic early endosome membrane	│ │ │ └─ postsynaptic early endosome membrane	GO:0098842
GO:0098998	D43	CC	extrinsic component of postsynaptic early endosome membrane	│ │ │ └─ extrinsic component of postsynaptic early endosome membrane	GO:0098896
GO:0098837	D24	CC	postsynaptic recycling endosome	│ │ └─ postsynaptic recycling endosome	GO:0098845
GO:0098944	D37	CC	postsynaptic recycling endosome membrane	│ │ └─ postsynaptic recycling endosome membrane	GO:0098837
GO:0099033	D44	CC	anchored component of postsynaptic recycling endosome membrane	│ │ └─ anchored component of postsynaptic recycling endosome membrane	GO:0098944
GO:0045211	D9	CC	postsynaptic membrane	│ ├─ postsynaptic membrane	GO:0098794	0.0152993	0.137694	HGNC:2514;HGNC:8032;HGNC:2171;HGNC:3591;HGNC:2510;HGNC:1759;HGNC:7994;HGNC:6153;HGNC:7656;HGNC:4575	CTNNB1;NTRK2;CNTN1;FARP1;CTNNA2;CDH2;NRCAM;ITGB1;NCAM1;GRID1	CTNNB1;NTRK2;CNTN1;FARP1;CTNNA2;CDH2;NRCAM;ITGB1;NCAM1;GLUD1
GO:0099025	D25	CC	anchored component of postsynaptic membrane	│ │ ├─ anchored component of postsynaptic membrane	GO:0045211			HGNC:2171	CNTN1	CNTN1
GO:0098890	D26	CC	extrinsic component of postsynaptic membrane	│ │ ├─ extrinsic component of postsynaptic membrane	GO:0045211			HGNC:3591;HGNC:2510	FARP1;CTNNA2	FARP1;CTNNA2
GO:0099055	D27	CC	integral component of postsynaptic membrane	│ │ └─ integral component of postsynaptic membrane	GO:0045211	0.143212	0.644453	HGNC:1759;HGNC:7994;HGNC:6153;HGNC:7656;HGNC:4575	CDH2;NRCAM;ITGB1;NCAM1;GRID1	CDH2;NRCAM;ITGB1;NCAM1;GLUD1
SYNGO:postsyn_ribosome	D10	CC	postsynaptic ribosome	│ ├─ postsynaptic ribosome	GO:0098794			HGNC:10325;HGNC:10334	RPL24;RPL31	RPL24;RPL31
SYNGO:postsyn_er	D11	CC	postsynaptic ER	│ └─ postsynaptic ER	GO:0098794
SYNGO:postsyn_er_membrane	D28	CC	postsynaptic ER membrane	│ ├─ postsynaptic ER membrane	SYNGO:postsyn_er
SYNGO:postsyn_er_membrane_integral	D38	CC	integral component of postsynaptic ER membrane	│ │ └─ integral component of postsynaptic ER membrane	SYNGO:postsyn_er_membrane
SYNGO:postsyn_ser	D29	CC	postsynaptic SER	│ └─ postsynaptic SER	SYNGO:postsyn_er
SYNGO:postsyn_ser_membrane	D39	CC	postsynaptic SER membrane	│ └─ postsynaptic SER membrane	SYNGO:postsyn_ser
SYNGO:postsyn_ser_membrane_integral	D45	CC	integral component of postsynaptic SER membrane	│ └─ integral component of postsynaptic SER membrane	SYNGO:postsyn_ser_membrane
GO:0099544	E1	CC	extrasynaptic space	└─ extrasynaptic space	GO:0045202			HGNC:23059;HGNC:5318	BCAN;TNC	BCAN;TNC
GO:0098966	E2	CC	perisynaptic extracellular matrix	└─ perisynaptic extracellular matrix	GO:0099544			HGNC:23059;HGNC:5318	BCAN;TNC	BCAN;TNC
SYNGO:synprocess		BP	process in the synapse	process in the synapse		0.985332	0.997198	HGNC:1435;HGNC:678;HGNC:22192;HGNC:2514;HGNC:9393;HGNC:1426;HGNC:11131;HGNC:6153;HGNC:9944;HGNC:7605;HGNC:3591;HGNC:8032;HGNC:1759;HGNC:7656;HGNC:8881;HGNC:8882;HGNC:16507;HGNC:3754;HGNC:18415;HGNC:7994;HGNC:4575;HGNC:1736;HGNC:9857;HGNC:2510;HGNC:13759;HGNC:329;HGNC:23059;HGNC:2319;HGNC:12691;HGNC:10325	CALB2;ARHGDIA;SCRN1;CTNNB1;PRKCA;CADPS;SNAP23;ITGB1;RDX;MYO6;FARP1;NTRK2;CDH2;NCAM1;PFN1;PFN2;SYNPR;FLNA;HIP1R;NRCAM;GRID1;CDC42;RAP1B;CTNNA2;CYFIP1;AGRN;BCAN;CPNE6;EZR;RPL24	CALB2;ARHGDIA;SCRN1;CTNNB1;PRKCA;CAPS;SNAP23;ITGB1;RDX;MYO6;FARP1;NTRK2;CDH2;NCAM1;PFN1;PFN2;SYNPR;FLNA;HIP1R;NRCAM;GLUD1;CDC42;RAP1B;CTNNA2;CYFIP1;AGRN;BCAN;CPNE6;EZR;RPL24
SYNGO:presynprocess	F1	BP	process in the presynapse	├─ process in the presynapse	SYNGO:synprocess	0.997198	0.997198	HGNC:1435;HGNC:678;HGNC:22192;HGNC:2514;HGNC:9393;HGNC:1426	CALB2;ARHGDIA;SCRN1;CTNNB1;PRKCA;CADPS	CALB2;ARHGDIA;SCRN1;CTNNB1;PRKCA;CAPS
GO:0099509	F2	BP	regulation of presynaptic cytosolic calcium levels	│ ├─ regulation of presynaptic cytosolic calcium levels	SYNGO:presynprocess			HGNC:1435	CALB2	CALB2
GO:1905056	F11	BP	ATPase-coupled calcium ion transmembrane transporter activity involved in regulation of presynaptic cytosolic calcium levels	│ │ ├─ ATPase-coupled calcium ion transmembrane transporter activity involved in regulation of presynaptic cytosolic calcium levels	GO:0099509
GO:0099534	F12	BP	calcium ion binding involved in regulation of presynaptic cytosolic calcium levels	│ │ ├─ calcium ion binding involved in regulation of presynaptic cytosolic calcium levels	GO:0099509			HGNC:1435	CALB2	CALB2
GO:0099626	F13	BP	voltage-gated calcium channel activity involved in regulation of presynaptic cytosolic calcium levels	│ │ └─ voltage-gated calcium channel activity involved in regulation of presynaptic cytosolic calcium levels	GO:0099509
GO:0099505	F3	BP	regulation of presynaptic membrane potential	│ ├─ regulation of presynaptic membrane potential	SYNGO:presynprocess
GO:0099507	F14	BP	ligand-gated ion channel activity involved in regulation of presynaptic membrane potential	│ │ ├─ ligand-gated ion channel activity involved in regulation of presynaptic membrane potential	GO:0099505
GO:0099508	F15	BP	voltage-gated ion channel activity involved in regulation of presynaptic membrane potential	│ │ ├─ voltage-gated ion channel activity involved in regulation of presynaptic membrane potential	GO:0099505
GO:0150047	F16	BP	G protein-coupled neurotransmitter receptor activity involved in regulation of presynaptic membrane potential	│ │ ├─ G protein-coupled neurotransmitter receptor activity involved in regulation of presynaptic membrane potential	GO:0099505
GO:0140232	F17	BP	intracellular cAMP-activated cation channel activity involved in regulation of presynaptic membrane potential	│ │ └─ intracellular cAMP-activated cation channel activity involved in regulation of presynaptic membrane potential	GO:0099505
GO:0140238	F4	BP	presynaptic endocytosis	│ ├─ presynaptic endocytosis	SYNGO:presynprocess
GO:0099504	F5	BP	synaptic vesicle cycle	│ ├─ synaptic vesicle cycle	SYNGO:presynprocess	0.993819	0.997198	HGNC:678;HGNC:22192;HGNC:2514;HGNC:9393;HGNC:1426	ARHGDIA;SCRN1;CTNNB1;PRKCA;CADPS	ARHGDIA;SCRN1;CTNNB1;PRKCA;CAPS
GO:0098693	F18	BP	regulation of synaptic vesicle cycle	│ │ ├─ regulation of synaptic vesicle cycle	GO:0099504			HGNC:678;HGNC:22192	ARHGDIA;SCRN1	ARHGDIA;SCRN1
GO:0097091	F19	BP	synaptic vesicle clustering	│ │ ├─ synaptic vesicle clustering	GO:0099504			HGNC:2514	CTNNB1	CTNNB1
GO:0099532	F20	BP	synaptic vesicle endosomal processing	│ │ ├─ synaptic vesicle endosomal processing	GO:0099504
GO:0016182	F29	BP	synaptic vesicle budding from endosome	│ │ │ ├─ synaptic vesicle budding from endosome	GO:0099532
GO:0016189	F30	BP	synaptic vesicle to endosome fusion	│ │ │ └─ synaptic vesicle to endosome fusion	GO:0099532
GO:0016079	F21	BP	synaptic vesicle exocytosis	│ │ ├─ synaptic vesicle exocytosis	GO:0099504			HGNC:9393;HGNC:1426	PRKCA;CADPS	PRKCA;CAPS
GO:0099502	F31	BP	calcium-dependent activation of synaptic vesicle fusion	│ │ │ ├─ calcium-dependent activation of synaptic vesicle fusion	GO:0016079
GO:0150037	F41	BP	regulation of calcium-dependent activation of synaptic vesicle fusion	│ │ │ │ └─ regulation of calcium-dependent activation of synaptic vesicle fusion	GO:0099502
GO:2000300	F32	BP	regulation of synaptic vesicle exocytosis	│ │ │ ├─ regulation of synaptic vesicle exocytosis	GO:0016079			HGNC:9393	PRKCA	PRKCA
GO:0016081	F33	BP	synaptic vesicle docking	│ │ │ ├─ synaptic vesicle docking	GO:0016079
GO:0099148	F42	BP	regulation of synaptic vesicle docking	│ │ │ │ └─ regulation of synaptic vesicle docking	GO:0016081
GO:0031629	F34	BP	synaptic vesicle fusion to presynaptic active zone membrane	│ │ │ ├─ synaptic vesicle fusion to presynaptic active zone membrane	GO:0016079
GO:0031630	F43	BP	regulation of synaptic vesicle fusion to presynaptic active zone membrane	│ │ │ │ └─ regulation of synaptic vesicle fusion to presynaptic active zone membrane	GO:0031629
GO:0016082	F35	BP	synaptic vesicle priming	│ │ │ └─ synaptic vesicle priming	GO:0016079			HGNC:1426	CADPS	CAPS
GO:0010807	F44	BP	regulation of synaptic vesicle priming	│ │ │ └─ regulation of synaptic vesicle priming	GO:0016082
GO:0098700	F22	BP	synaptic vesicle neurotransmitter loading	│ │ ├─ synaptic vesicle neurotransmitter loading	GO:0099504
GO:0099162	F36	BP	regulation of synaptic vesicle neurotransmitter loading	│ │ │ └─ regulation of synaptic vesicle neurotransmitter loading	GO:0098700
GO:0099180	F23	BP	zinc ion import into synaptic vesicle	│ │ ├─ zinc ion import into synaptic vesicle	GO:0099504
GO:0097401	F24	BP	synaptic vesicle proton loading	│ │ ├─ synaptic vesicle proton loading	GO:0099504
GO:1901546	F37	BP	regulation of proton loading	│ │ │ └─ regulation of proton loading	GO:0097401
GO:0048488	F25	BP	synaptic vesicle endocytosis	│ │ └─ synaptic vesicle endocytosis	GO:0099504
GO:1900242	F38	BP	regulation of synaptic vesicle endocytosis	│ │ ├─ regulation of synaptic vesicle endocytosis	GO:0048488
GO:0016185	F39	BP	synaptic vesicle budding from presynaptic endocytic zone membrane	│ │ ├─ synaptic vesicle budding from presynaptic endocytic zone membrane	GO:0048488
GO:0098694	F45	BP	regulation of synaptic vesicle budding from presynaptic endocytic zone membrane	│ │ │ └─ regulation of synaptic vesicle budding from presynaptic endocytic zone membrane	GO:0016185
GO:0016191	F40	BP	synaptic vesicle uncoating	│ │ └─ synaptic vesicle uncoating	GO:0048488
GO:0099525	F6	BP	presynaptic dense core vesicle exocytosis	│ ├─ presynaptic dense core vesicle exocytosis	SYNGO:presynprocess			HGNC:1426	CADPS	CAPS
GO:0099161	F26	BP	regulation of presynaptic dense core vesicle exocytosis	│ │ └─ regulation of presynaptic dense core vesicle exocytosis	GO:0099525
GO:0001504	F7	BP	neurotransmitter uptake	│ ├─ neurotransmitter uptake	SYNGO:presynprocess
GO:0098810	F8	BP	neurotransmitter reuptake	│ ├─ neurotransmitter reuptake	SYNGO:presynprocess
GO:0051580	F27	BP	regulation of neurotransmitter uptake	│ │ └─ regulation of neurotransmitter uptake	GO:0098810
SYNGO:presyn_chaperoneProteinFolding	F9	BP	presynaptic chaperone-mediated protein folding	│ ├─ presynaptic chaperone-mediated protein folding	SYNGO:presynprocess
GO:0098928	F10	BP	presynaptic signaling pathway	│ └─ presynaptic signaling pathway	SYNGO:presynprocess
GO:0099526	F28	BP	presynapse to nucleus signaling pathway	│ └─ presynapse to nucleus signaling pathway	GO:0098928
SYNGO:postsynprocess	G1	BP	process in the postsynapse	├─ process in the postsynapse	SYNGO:synprocess	0.982952		HGNC:11131;HGNC:6153;HGNC:9944;HGNC:7605	SNAP23;ITGB1;RDX;MYO6	SNAP23;ITGB1;RDX;MYO6
GO:0099566	G2	BP	regulation of postsynaptic cytosolic calcium levels	│ ├─ regulation of postsynaptic cytosolic calcium levels	SYNGO:postsynprocess
GO:1905059	G8	BP	ATPase-coupled calcium ion transmembrane transporter activity involved in regulation of postsynaptic cytosolic calcium levels	│ │ ├─ ATPase-coupled calcium ion transmembrane transporter activity involved in regulation of postsynaptic cytosolic calcium levels	GO:0099566
GO:0099567	G9	BP	calcium ion binding involved in regulation of postsynaptic cytosolic calcium levels	│ │ ├─ calcium ion binding involved in regulation of postsynaptic cytosolic calcium levels	GO:0099566
GO:1905060	G10	BP	calcium:cation antiporter activity involved in regulation of postsynaptic cytosolic calcium ion levels	│ │ ├─ calcium:cation antiporter activity involved in regulation of postsynaptic cytosolic calcium ion levels	GO:0099566
GO:0098695	G11	BP	inositol 1,4,5-trisphosphate receptor activity involved in regulation of postsynaptic cytosolic calcium levels	│ │ ├─ inositol 1,4,5-trisphosphate receptor activity involved in regulation of postsynaptic cytosolic calcium levels	GO:0099566
GO:0099583	G12	BP	neurotransmitter receptor activity involved in regulation of postsynaptic cytosolic calcium levels	│ │ └─ neurotransmitter receptor activity involved in regulation of postsynaptic cytosolic calcium levels	GO:0099566
GO:0098872	G22	BP	G-protein coupled neurotransmitter receptor activity involved in regulation of postsynaptic cytosolic calcium levels	│ │ └─ G-protein coupled neurotransmitter receptor activity involved in regulation of postsynaptic cytosolic calcium levels	GO:0099583
GO:0060078	G3	BP	regulation of postsynaptic membrane potential	│ ├─ regulation of postsynaptic membrane potential	SYNGO:postsynprocess
GO:0140233	G13	BP	intracellular cAMP-activated cation channel activity involved in regulation of postsynaptic membrane potential	│ │ ├─ intracellular cAMP-activated cation channel activity involved in regulation of postsynaptic membrane potential	GO:0060078
GO:0099579	G23	BP	G protein-coupled neurotransmitter receptor activity involved in regulation of postsynaptic membrane potential	│ │ │ └─ G protein-coupled neurotransmitter receptor activity involved in regulation of postsynaptic membrane potential	GO:0140233
GO:1904315	G14	BP	transmitter-gated ion channel activity involved in regulation of postsynaptic membrane potential	│ │ ├─ transmitter-gated ion channel activity involved in regulation of postsynaptic membrane potential	GO:0060078
GO:1905030	G15	BP	voltage-gated ion channel activity involved in regulation of postsynaptic membrane potential	│ │ └─ voltage-gated ion channel activity involved in regulation of postsynaptic membrane potential	GO:0060078
GO:0098962	G4	BP	regulation of postsynaptic neurotransmitter receptor activity	│ ├─ regulation of postsynaptic neurotransmitter receptor activity	SYNGO:postsynprocess
GO:0099072	G5	BP	regulation of postsynaptic membrane neurotransmitter receptor levels	│ ├─ regulation of postsynaptic membrane neurotransmitter receptor levels	SYNGO:postsynprocess	0.900187	0.997198	HGNC:11131;HGNC:6153;HGNC:9944;HGNC:7605	SNAP23;ITGB1;RDX;MYO6	SNAP23;ITGB1;RDX;MYO6
GO:0099645	G16	BP	neurotransmitter receptor localization to postsynaptic specialization membrane	│ │ ├─ neurotransmitter receptor localization to postsynaptic specialization membrane	GO:0099072
GO:0098696	G24	BP	regulation of neurotransmitter receptor localization to postsynaptic specialization membrane	│ │ │ └─ regulation of neurotransmitter receptor localization to postsynaptic specialization membrane	GO:0099645
GO:0098967	G17	BP	exocytic insertion of neurotransmitter receptor to postsynaptic membrane	│ │ ├─ exocytic insertion of neurotransmitter receptor to postsynaptic membrane	GO:0099072			HGNC:11131	SNAP23	SNAP23
GO:0099145	G25	BP	regulation of exocytic insertion of neurotransmitter receptor to postsynaptic membrane	│ │ │ └─ regulation of exocytic insertion of neurotransmitter receptor to postsynaptic membrane	GO:0098967
GO:0098970	G18	BP	postsynaptic neurotransmitter receptor diffusion trapping	│ │ ├─ postsynaptic neurotransmitter receptor diffusion trapping	GO:0099072			HGNC:6153;HGNC:9944	ITGB1;RDX	ITGB1;RDX
GO:0150054	G26	BP	regulation of postsynaptic neurotransmitter receptor diffusion trapping	│ │ │ └─ regulation of postsynaptic neurotransmitter receptor diffusion trapping	GO:0098970			HGNC:6153;HGNC:9944	ITGB1;RDX	ITGB1;RDX
GO:0098884	G19	BP	postsynaptic neurotransmitter receptor endocytosis	│ │ └─ postsynaptic neurotransmitter receptor endocytosis	GO:0099072			HGNC:7605	MYO6	MYO6
GO:0099149	G27	BP	regulation of postsynaptic neurotransmitter receptor endocytosis	│ │ └─ regulation of postsynaptic neurotransmitter receptor endocytosis	GO:0098884
GO:0150038	G6	BP	postsynaptic dense core vesicle exocytosis	│ ├─ postsynaptic dense core vesicle exocytosis	SYNGO:postsynprocess
GO:0150044	G20	BP	regulation of postsynaptic dense core vesicle exocytosis	│ │ └─ regulation of postsynaptic dense core vesicle exocytosis	GO:0150038
GO:0098926	G7	BP	postsynaptic signaling pathway	│ └─ postsynaptic signaling pathway	SYNGO:postsynprocess
GO:0099527	G21	BP	postsynapse to nucleus signaling pathway	│ └─ postsynapse to nucleus signaling pathway	GO:0098926
GO:1905539	G28	BP	regulation of postsynapse to nucleus signaling pathway	│ └─ regulation of postsynapse to nucleus signaling pathway	GO:0099527
GO:0099536	H1	BP	synaptic signaling	├─ synaptic signaling	SYNGO:synprocess	0.345735		HGNC:3591;HGNC:8032;HGNC:1759;HGNC:6153;HGNC:7656;HGNC:8881;HGNC:8882;HGNC:16507;HGNC:7605	FARP1;NTRK2;CDH2;ITGB1;NCAM1;PFN1;PFN2;SYNPR;MYO6	FARP1;NTRK2;CDH2;ITGB1;NCAM1;PFN1;PFN2;SYNPR;MYO6
GO:0099537	H2	BP	trans-synaptic signaling	│ ├─ trans-synaptic signaling	GO:0099536	0.345735	0.735458	HGNC:3591;HGNC:8032;HGNC:1759;HGNC:6153;HGNC:7656;HGNC:8881;HGNC:8882;HGNC:16507;HGNC:7605	FARP1;NTRK2;CDH2;ITGB1;NCAM1;PFN1;PFN2;SYNPR;MYO6	FARP1;NTRK2;CDH2;ITGB1;NCAM1;PFN1;PFN2;SYNPR;MYO6
GO:0099541	H5	BP	trans-synaptic signaling by lipid	│ │ ├─ trans-synaptic signaling by lipid	GO:0099537
GO:0099542	H13	BP	trans-synaptic signaling by endocannabinoid	│ │ │ └─ trans-synaptic signaling by endocannabinoid	GO:0099541
GO:0098921	H21	BP	retrograde trans-synaptic signaling by endocannabinoid	│ │ │ ├─ retrograde trans-synaptic signaling by endocannabinoid	GO:0099542
GO:0099178	H26	BP	regulation of retrograde trans-synaptic signaling by endocanabinoid	│ │ │ │ └─ regulation of retrograde trans-synaptic signaling by endocanabinoid	GO:0098921
GO:0099553	H22	BP	trans-synaptic signaling by endocannabinoid, modulating synaptic transmission	│ │ │ └─ trans-synaptic signaling by endocannabinoid, modulating synaptic transmission	GO:0099542
GO:0150036	H27	BP	regulation of trans-synaptic signaling by endocannabinoid, modulating synaptic transmission	│ │ │ └─ regulation of trans-synaptic signaling by endocannabinoid, modulating synaptic transmission	GO:0099553
GO:0099540	H6	BP	trans-synaptic signaling by neuropeptide	│ │ ├─ trans-synaptic signaling by neuropeptide	GO:0099537
GO:0099543	H7	BP	trans-synaptic signaling by soluble gas	│ │ ├─ trans-synaptic signaling by soluble gas	GO:0099537
GO:0099548	H14	BP	trans-synaptic signaling by nitric oxide	│ │ │ └─ trans-synaptic signaling by nitric oxide	GO:0099543
GO:0099555	H23	BP	trans-synaptic signaling by nitric oxide, modulating synaptic transmission	│ │ │ └─ trans-synaptic signaling by nitric oxide, modulating synaptic transmission	GO:0099548
GO:0098925	H28	BP	retrograde trans-synaptic signaling by nitric oxide, modulating synaptic transmission	│ │ │ └─ retrograde trans-synaptic signaling by nitric oxide, modulating synaptic transmission	GO:0099555
GO:0099545	H8	BP	trans-synaptic signaling by trans-synaptic complex	│ │ ├─ trans-synaptic signaling by trans-synaptic complex	GO:0099537			HGNC:3591	FARP1	FARP1
GO:0098942	H15	BP	retrograde trans-synaptic signaling by trans-synaptic protein complex	│ │ │ ├─ retrograde trans-synaptic signaling by trans-synaptic protein complex	GO:0099545			HGNC:3591	FARP1	FARP1
GO:0099557	H16	BP	trans-synaptic signaling by trans-synaptic complex, modulating synaptic transmission	│ │ │ └─ trans-synaptic signaling by trans-synaptic complex, modulating synaptic transmission	GO:0099545
GO:0099157	H9	BP	trans-synaptic signalling via exosome	│ │ ├─ trans-synaptic signalling via exosome	GO:0099537
GO:0099183	H10	BP	trans-synaptic signaling by BDNF, modulating synaptic transmission	│ │ ├─ trans-synaptic signaling by BDNF, modulating synaptic transmission	GO:0099537			HGNC:8032	NTRK2	NTRK2
GO:0150035	H17	BP	regulation of trans-synaptic signaling by BDNF, modulating synaptic transmission	│ │ │ └─ regulation of trans-synaptic signaling by BDNF, modulating synaptic transmission	GO:0099183
GO:0007268	H11	BP	chemical synaptic transmission	│ │ └─ chemical synaptic transmission	GO:0099537	0.533666	0.77085	HGNC:1759;HGNC:6153;HGNC:7656;HGNC:8881;HGNC:8882;HGNC:16507;HGNC:7605	CDH2;ITGB1;NCAM1;PFN1;PFN2;SYNPR;MYO6	CDH2;ITGB1;NCAM1;PFN1;PFN2;SYNPR;MYO6
GO:0050804	H18	BP	modulation of chemical synaptic transmission	│ │ ├─ modulation of chemical synaptic transmission	GO:0007268	0.307789	0.735458	HGNC:1759;HGNC:6153;HGNC:7656;HGNC:8881;HGNC:8882;HGNC:16507	CDH2;ITGB1;NCAM1;PFN1;PFN2;SYNPR	CDH2;ITGB1;NCAM1;PFN1;PFN2;SYNPR
GO:0099531	H19	BP	presynaptic process involved in chemical synaptic transmission	│ │ ├─ presynaptic process involved in chemical synaptic transmission	GO:0007268			HGNC:8882;HGNC:7605	PFN2;MYO6	PFN2;MYO6
GO:0099171	H24	BP	presynaptic modulation of chemical synaptic transmission	│ │ │ └─ presynaptic modulation of chemical synaptic transmission	GO:0099531			HGNC:8882;HGNC:7605	PFN2;MYO6	PFN2;MYO6
GO:0099565	H20	BP	postsynaptic process involved in chemical synaptic transmission	│ │ └─ postsynaptic process involved in chemical synaptic transmission	GO:0007268
GO:0099170	H25	BP	postsynaptic modulation of chemical synaptic transmission	│ │ └─ postsynaptic modulation of chemical synaptic transmission	GO:0099565
GO:0099538	H3	BP	synaptic signaling via neuropeptide	│ ├─ synaptic signaling via neuropeptide	GO:0099536
GO:0099163	H4	BP	synaptic signaling by nitric oxide	│ └─ synaptic signaling by nitric oxide	GO:0099536
GO:0150045	H12	BP	regulation of synaptic signaling by nitric oxide	│ └─ regulation of synaptic signaling by nitric oxide	GO:0099163
GO:0050808	I1	BP	synapse organization	├─ synapse organization	SYNGO:synprocess	0.269759	0.735458	HGNC:3754;HGNC:18415;HGNC:7994;HGNC:4575;HGNC:1736;HGNC:9857;HGNC:2510;HGNC:8881;HGNC:8882;HGNC:13759;HGNC:329;HGNC:7656;HGNC:2514;HGNC:3591;HGNC:6153;HGNC:23059;HGNC:2319;HGNC:12691	FLNA;HIP1R;NRCAM;GRID1;CDC42;RAP1B;CTNNA2;PFN1;PFN2;CYFIP1;AGRN;NCAM1;CTNNB1;FARP1;ITGB1;BCAN;CPNE6;EZR	FLNA;HIP1R;NRCAM;GLUD1;CDC42;RAP1B;CTNNA2;PFN1;PFN2;CYFIP1;AGRN;NCAM1;CTNNB1;FARP1;ITGB1;BCAN;CPNE6;EZR
GO:0099172	I2	BP	presynapse organization	│ ├─ presynapse organization	GO:0050808
GO:0099174	I16	BP	regulation of presynapse organization	│ │ └─ regulation of presynapse organization	GO:0099172
GO:0099173	I3	BP	postsynapse organization	│ ├─ postsynapse organization	GO:0050808	0.396016	0.735458	HGNC:18415;HGNC:7994;HGNC:4575;HGNC:1736	HIP1R;NRCAM;GRID1;CDC42	HIP1R;NRCAM;GLUD1;CDC42
GO:0099175	I17	BP	regulation of postsynapse organization	│ │ ├─ regulation of postsynapse organization	GO:0099173	0.470731	0.764938	HGNC:7994;HGNC:4575;HGNC:1736	NRCAM;GRID1;CDC42	NRCAM;GLUD1;CDC42
GO:0099084	I18	BP	postsynaptic specialization organization	│ │ └─ postsynaptic specialization organization	GO:0099173
GO:0099563	I4	BP	modification of synaptic structure	│ ├─ modification of synaptic structure	GO:0050808	0.0479601		HGNC:9857;HGNC:1736;HGNC:2510;HGNC:8881;HGNC:8882;HGNC:13759	RAP1B;CDC42;CTNNA2;PFN1;PFN2;CYFIP1	RAP1B;CDC42;CTNNA2;PFN1;PFN2;CYFIP1
GO:0099010	I19	BP	modification of postsynaptic structure	│ │ └─ modification of postsynaptic structure	GO:0099563	0.0479601	0.623482	HGNC:9857;HGNC:1736;HGNC:2510;HGNC:8881;HGNC:8882;HGNC:13759	RAP1B;CDC42;CTNNA2;PFN1;PFN2;CYFIP1	RAP1B;CDC42;CTNNA2;PFN1;PFN2;CYFIP1
GO:0099159	I34	BP	regulation of modification of postsynaptic structure	│ │ ├─ regulation of modification of postsynaptic structure	GO:0099010			HGNC:1736	CDC42	CDC42
GO:0098885	I35	BP	modification of postsynaptic actin cytoskeleton	│ │ └─ modification of postsynaptic actin cytoskeleton	GO:0099010	0.110313	0.717034	HGNC:2510;HGNC:8881;HGNC:8882;HGNC:13759	CTNNA2;PFN1;PFN2;CYFIP1	CTNNA2;PFN1;PFN2;CYFIP1
GO:1905274	I47	BP	regulation of modification of postsynaptic actin cytoskeleton	│ │ └─ regulation of modification of postsynaptic actin cytoskeleton	GO:0098885			HGNC:13759	CYFIP1	CYFIP1
GO:0050807	I5	BP	regulation of synapse organization	│ ├─ regulation of synapse organization	GO:0050808			HGNC:329	AGRN	AGRN
GO:0098918	I6	BP	structural constituent of synapse	│ ├─ structural constituent of synapse	GO:0050808
GO:0099181	I20	BP	structural constituent of presynapse	│ │ ├─ structural constituent of presynapse	GO:0098918
GO:0098882	I36	BP	structural constituent of active zone	│ │ │ ├─ structural constituent of active zone	GO:0099181
GO:0098699	I37	BP	structural constituent of presynaptic actin cytoskeleton	│ │ │ └─ structural constituent of presynaptic actin cytoskeleton	GO:0099181
GO:0099186	I21	BP	structural constituent of postsynapse	│ │ └─ structural constituent of postsynapse	GO:0098918
GO:0098973	I38	BP	structural constituent of postsynaptic actin cytoskeleton	│ │ ├─ structural constituent of postsynaptic actin cytoskeleton	GO:0099186
GO:0099184	I39	BP	structural constituent of postsynaptic intermediate filament cytoskeleton	│ │ ├─ structural constituent of postsynaptic intermediate filament cytoskeleton	GO:0099186
GO:0098879	I40	BP	structural constituent of postsynaptic specialization	│ │ ├─ structural constituent of postsynaptic specialization	GO:0099186
GO:0098919	I41	BP	structural constituent of postsynaptic density	│ │ └─ structural constituent of postsynaptic density	GO:0099186
GO:0150043	I7	BP	structural constituent of synapse-associated extracellular matrix	│ ├─ structural constituent of synapse-associated extracellular matrix	GO:0050808
GO:0099560	I8	BP	synapse adhesion between pre- and post-synapse	│ ├─ synapse adhesion between pre- and post-synapse	GO:0050808			HGNC:7656	NCAM1	NCAM1
GO:0099179	I22	BP	regulation of synaptic membrane adhesion	│ │ └─ regulation of synaptic membrane adhesion	GO:0099560
GO:0008039	I9	BP	synaptic target recognition	│ ├─ synaptic target recognition	GO:0050808
GO:0007416	I10	BP	synapse assembly	│ ├─ synapse assembly	GO:0050808			HGNC:2514;HGNC:3591	CTNNB1;FARP1	CTNNB1;FARP1
GO:0099054	I23	BP	presynapse assembly	│ │ ├─ presynapse assembly	GO:0007416
GO:0051963	I24	BP	regulation of synapse assembly	│ │ ├─ regulation of synapse assembly	GO:0007416			HGNC:2514;HGNC:3591	CTNNB1;FARP1	CTNNB1;FARP1
GO:1905606	I42	BP	regulation of presynapse assembly	│ │ │ ├─ regulation of presynapse assembly	GO:0051963			HGNC:3591	FARP1	FARP1
GO:0150052	I43	BP	regulation of postsynapse assembly	│ │ │ └─ regulation of postsynapse assembly	GO:0051963
GO:0098698	I25	BP	postsynaptic specialization assembly	│ │ ├─ postsynaptic specialization assembly	GO:0007416
GO:0099150	I44	BP	regulation of postsynaptic specialization assembly	│ │ │ ├─ regulation of postsynaptic specialization assembly	GO:0098698
GO:0097107	I45	BP	postsynaptic density assembly	│ │ │ └─ postsynaptic density assembly	GO:0098698
GO:0099151	I48	BP	regulation of postsynaptic density assembly	│ │ │ └─ regulation of postsynaptic density assembly	GO:0097107
GO:0097104	I26	BP	postsynaptic membrane assembly	│ │ └─ postsynaptic membrane assembly	GO:0007416
GO:0098883	I11	BP	synapse disassembly	│ ├─ synapse disassembly	GO:0050808			HGNC:6153	ITGB1	ITGB1
GO:1905806	I27	BP	regulation of synapse disassembly	│ │ └─ regulation of synapse disassembly	GO:0098883			HGNC:6153	ITGB1	ITGB1
GO:0060074	I12	BP	synapse maturation	│ ├─ synapse maturation	GO:0050808			HGNC:8881;HGNC:23059	PFN1;BCAN	PFN1;BCAN
GO:0090128	I28	BP	regulation of synapse maturation	│ │ └─ regulation of synapse maturation	GO:0060074
GO:0099558	I13	BP	maintenance of synapse structure	│ ├─ maintenance of synapse structure	GO:0050808			HGNC:6153	ITGB1	ITGB1
GO:0099559	I29	BP	maintenance of alignment of postsynaptic density and presynaptic active zone	│ │ ├─ maintenance of alignment of postsynaptic density and presynaptic active zone	GO:0099558
GO:0098880	I30	BP	maintenance of postsynaptic specialization structure	│ │ └─ maintenance of postsynaptic specialization structure	GO:0099558			HGNC:6153	ITGB1	ITGB1
GO:0099562	I46	BP	maintenance of postsynaptic density structure	│ │ └─ maintenance of postsynaptic density structure	GO:0098880
GO:0099187	I14	BP	presynaptic cytoskeleton organization	│ ├─ presynaptic cytoskeleton organization	GO:0050808
GO:0099140	I31	BP	presynaptic actin cytoskeleton organization	│ │ └─ presynaptic actin cytoskeleton organization	GO:0099187
GO:0099188	I15	BP	postsynaptic cytoskeleton organization	│ └─ postsynaptic cytoskeleton organization	GO:0050808	0.234229		HGNC:3591;HGNC:2319;HGNC:12691	FARP1;CPNE6;EZR	FARP1;CPNE6;EZR
GO:0098974	I32	BP	postsynaptic actin cytoskeleton organization	│ ├─ postsynaptic actin cytoskeleton organization	GO:0099188	0.234229	0.735458	HGNC:3591;HGNC:2319;HGNC:12691	FARP1;CPNE6;EZR	FARP1;CPNE6;EZR
GO:0099190	I33	BP	postsynaptic spectrin-associated cytoskeleton organization	│ └─ postsynaptic spectrin-associated cytoskeleton organization	GO:0099188
SYNGO:metabolism	J1	BP	metabolism	├─ metabolism	SYNGO:synprocess			HGNC:13759;HGNC:10325	CYFIP1;RPL24	CYFIP1;RPL24
SYNGO:presyn_ATPmetabolic	J2	BP	ATP metabolic process in the presynapse	│ ├─ ATP metabolic process in the presynapse	SYNGO:metabolism
SYNGO:presyn_regulationATPmetabolic	J12	BP	regulation of ATP metabolic process in the presynapse	│ │ └─ regulation of ATP metabolic process in the presynapse	SYNGO:presyn_ATPmetabolic
SYNGO:postsyn_ATPmetabolic	J3	BP	ATP metabolic process in the postsynapse	│ ├─ ATP metabolic process in the postsynapse	SYNGO:metabolism
GO:0099546	J4	BP	protein catabolic process, modulating synaptic transmission	│ ├─ protein catabolic process, modulating synaptic transmission	SYNGO:metabolism
GO:0099574	J5	BP	regulation of protein catabolic process at synapse, modulating synaptic transmission	│ ├─ regulation of protein catabolic process at synapse, modulating synaptic transmission	SYNGO:metabolism
GO:0099576	J13	BP	regulation of protein catabolic process at postsynapse, modulating synaptic transmission	│ │ ├─ regulation of protein catabolic process at postsynapse, modulating synaptic transmission	GO:0099574
GO:0099575	J14	BP	regulation of protein catabolic process at presynapse, modulating synaptic transmission	│ │ └─ regulation of protein catabolic process at presynapse, modulating synaptic transmission	GO:0099574
GO:0099547	J6	BP	regulation of translation at synapse, modulating synaptic transmission	│ ├─ regulation of translation at synapse, modulating synaptic transmission	SYNGO:metabolism			HGNC:13759	CYFIP1	CYFIP1
GO:0099578	J15	BP	regulation of translation at postsynapse, modulating synaptic transmission	│ │ ├─ regulation of translation at postsynapse, modulating synaptic transmission	GO:0099547			HGNC:13759	CYFIP1	CYFIP1
GO:0099577	J16	BP	regulation of translation at presynapse, modulating synaptic transmission	│ │ └─ regulation of translation at presynapse, modulating synaptic transmission	GO:0099547
GO:0042135	J7	BP	neurotransmitter catabolic process	│ ├─ neurotransmitter catabolic process	SYNGO:metabolism
GO:0140246	J8	BP	protein catabolic process at synapse	│ ├─ protein catabolic process at synapse	SYNGO:metabolism
GO:0140247	J17	BP	protein catabolic process at presynapse	│ │ ├─ protein catabolic process at presynapse	GO:0140246
GO:0140251	J21	BP	regulation protein catabolic process at presynapse	│ │ │ └─ regulation protein catabolic process at presynapse	GO:0140247
GO:0140249	J18	BP	protein catabolic process at postsynapse	│ │ └─ protein catabolic process at postsynapse	GO:0140246
GO:0140252	J22	BP	regulation protein catabolic process at postsynapse	│ │ └─ regulation protein catabolic process at postsynapse	GO:0140249
GO:0042136	J9	BP	neurotransmitter biosynthetic process	│ ├─ neurotransmitter biosynthetic process	SYNGO:metabolism
GO:0140241	J10	BP	translation at synapse	│ ├─ translation at synapse	SYNGO:metabolism			HGNC:10325	RPL24	RPL24
GO:0140236	J19	BP	translation at presynapse	│ │ ├─ translation at presynapse	GO:0140241			HGNC:10325	RPL24	RPL24
GO:0140242	J20	BP	translation at postsynapse	│ │ └─ translation at postsynapse	GO:0140241			HGNC:10325	RPL24	RPL24
GO:0140245	J23	BP	regulation of translation at postsynapse	│ │ └─ regulation of translation at postsynapse	GO:0140242
GO:0140235	J11	BP	RNA polyadenylation at postsynapse	│ └─ RNA polyadenylation at postsynapse	SYNGO:metabolism
SYNGO:transport	K1	BP	transport	└─ transport	SYNGO:synprocess
GO:0008088	K2	BP	axo-dendritic transport	├─ axo-dendritic transport	SYNGO:transport
GO:0098930	K7	BP	axonal transport	│ ├─ axonal transport	GO:0008088
GO:0008089	K13	BP	anterograde axonal transport	│ │ ├─ anterograde axonal transport	GO:0098930
GO:0099641	K21	BP	anterograde axonal protein transport	│ │ │ ├─ anterograde axonal protein transport	GO:0008089
GO:0140231	K22	BP	anterograde axonal transport of neurotransmitter receptor complex	│ │ │ └─ anterograde axonal transport of neurotransmitter receptor complex	GO:0008089
GO:0099088	K14	BP	axonal transport of messenger ribonucleoprotein complex	│ │ └─ axonal transport of messenger ribonucleoprotein complex	GO:0098930
GO:0098935	K8	BP	dendritic transport	│ └─ dendritic transport	GO:0008088
GO:0098937	K15	BP	anterograde dendritic transport	│ ├─ anterograde dendritic transport	GO:0098935
GO:0098971	K23	BP	anterograde dendritic transport of neurotransmitter receptor complex	│ │ └─ anterograde dendritic transport of neurotransmitter receptor complex	GO:0098937
GO:0098939	K16	BP	dendritic transport of mitochondrion	│ ├─ dendritic transport of mitochondrion	GO:0098935
GO:0098961	K17	BP	dendritic transport of ribonucleoprotein complex	│ └─ dendritic transport of ribonucleoprotein complex	GO:0098935
GO:0098963	K24	BP	dendritic transport of messenger ribonucleoprotein complex	│ └─ dendritic transport of messenger ribonucleoprotein complex	GO:0098961
GO:0098964	K27	BP	anterograde dendritic transport of messenger ribonucleoprotein complex	│ └─ anterograde dendritic transport of messenger ribonucleoprotein complex	GO:0098963
GO:0099514	K3	BP	synaptic vesicle cytoskeletal transport	├─ synaptic vesicle cytoskeletal transport	SYNGO:transport
GO:0099517	K9	BP	synaptic vesicle transport along microtubule	│ └─ synaptic vesicle transport along microtubule	GO:0099514
GO:0048490	K18	BP	anterograde synaptic vesicle transport	│ └─ anterograde synaptic vesicle transport	GO:0099517
GO:1903742	K25	BP	regulation of anterograde synaptic vesicle transport	│ └─ regulation of anterograde synaptic vesicle transport	GO:0048490
GO:0099090	K4	BP	synaptic vesicle recycling via endosome	├─ synaptic vesicle recycling via endosome	SYNGO:transport
GO:0099158	K10	BP	regulation of recycling endosome localization within postsynapse	│ └─ regulation of recycling endosome localization within postsynapse	GO:0099090
GO:0099089	K5	BP	establishment of endoplasmic reticulum localization to postsynapse	├─ establishment of endoplasmic reticulum localization to postsynapse	SYNGO:transport
GO:0099637	K6	BP	neurotransmitter receptor transport	└─ neurotransmitter receptor transport	SYNGO:transport
GO:0098877	K11	BP	neurotransmitter receptor transport to plasma membrane	├─ neurotransmitter receptor transport to plasma membrane	GO:0099637
GO:0098969	K19	BP	neurotransmitter receptor transport to postsynaptic membrane	│ ├─ neurotransmitter receptor transport to postsynaptic membrane	GO:0098877
GO:0099639	K20	BP	neurotransmitter receptor transport, endosome to plasma membrane	│ └─ neurotransmitter receptor transport, endosome to plasma membrane	GO:0098877
GO:0098887	K26	BP	neurotransmitter receptor transport, endosome to postsynaptic membrane	│ └─ neurotransmitter receptor transport, endosome to postsynaptic membrane	GO:0099639
GO:0099152	K28	BP	regulation of neurotransmitter receptor transport, endosome to postsynaptic membrane	│ └─ regulation of neurotransmitter receptor transport, endosome to postsynaptic membrane	GO:0098887
GO:0098943	K12	BP	neurotransmitter receptor transport, postsynaptic endosome to lysosome	└─ neurotransmitter receptor transport, postsynaptic endosome to lysosome	GO:0099637

## Sheet: FTD-GRN lower expr prot
GO term ID	user interface reference code	GO domain	GO term name	GO term name - hierarchical structure	GO parent term ID	GSEA p-value	GSEA 'gene cluster' FDR corrected p-value	genes - hgnc_id	genes - hgnc_symbol	genes - your genelist input
GO:0045202		CC	synapse	synapse		0.00313515	0.0135856	HGNC:3313;HGNC:1052;HGNC:12005;HGNC:9314;HGNC:10469;HGNC:4449;HGNC:12684;HGNC:3298;HGNC:17062;HGNC:9851;HGNC:17187;HGNC:29478;HGNC:2309;HGNC:11276;HGNC:471;HGNC:12642;HGNC:19679;HGNC:555;HGNC:244;HGNC:20879;HGNC:10003;HGNC:4401;HGNC:25412;HGNC:9612;HGNC:9401;HGNC:947;HGNC:24600;HGNC:11140;HGNC:7734;HGNC:7739;HGNC:4687;HGNC:12669;HGNC:815;HGNC:10596;HGNC:4572;HGNC:9706;HGNC:4845;HGNC:4573;HGNC:899…	ELAVL2;BIN1;TPD52;PPP3CA;RTN3;GPC1;VGF;EIF4G3;HABP4;RANBP6;OLFM1;ROGDI;CPLX1;SPTBN2;AMPH;VAMP1;AAK1;AP1G1;ADD2;CASKIN1;RGS7;GNB5;SGIP1;PTK2B;PRKCE;BAIAP2;ANKS1B;SNCB;NEFM;NEFL;GUCY1B1;VDAC1;ATP2B2;SCN8A;GRIA2;NECTIN1;HCN1;GRIA3;PIP5K1C;DNM1L;PICALM;SNAP91;DNAJC6;VAMP4;PICK1;SYN3;RPH3A;ATP6V1C1;ATP6V1D;ATP6V1F;ATP6V1H;SLC30A3;SYT2;SYT12;SNPH;PRRT2;SNAP25;KCNA2;ADAM23;SYT7;PTPRD;APOE;LGI1;WASF1;CAM…	ELAVL2;BIN1;TPD52;PPP3CA;RTN3;GPC1;VGF;EIF4G3;HABP4;RANBP6;OLFM1;ROGDI;CPLX1;SPTBN2;AMPH;VAMP1;AAK1;AP1G1;ADD2;CASKIN1;RGS7;GNB5;SGIP1;PTK2B;PRKCE;BAIAP2;ANKS1B;SNCB;NEFM;NEFL;GUCY1B1;VDAC1;ATP2B2;SCN8A;GRIA2;NECTIN1;HCN1;GRIA3;PIP5K1C;DNM1L;PICALM;SNAP91;DNAJC6;VAMP4;PICK1;SYN3;RPH3A;ATP6V1C1;ATP6V1D;ATP6V1F;ATP6V1H;SLC30A3;SYT2;SYT12;SNPH;PRRT2;SNAP25;KCNA2;ADAM23;SYT7;PTPRD;APOE;LGI1;WASF1;CAM…
GO:0097060	A1	CC	synaptic membrane	├─ synaptic membrane	GO:0045202			HGNC:17187	OLFM1	OLFM1
GO:0099243	A2	CC	extrinsic component of synaptic membrane	│ ├─ extrinsic component of synaptic membrane	GO:0097060			HGNC:17187	OLFM1	OLFM1
GO:0099699	A3	CC	integral component of synaptic membrane	│ └─ integral component of synaptic membrane	GO:0097060
GO:0098793	B1	CC	presynapse	├─ presynapse	GO:0045202	0.0485756	0.0971512	HGNC:29478;HGNC:2309;HGNC:11276;HGNC:471;HGNC:12642;HGNC:19679;HGNC:555;HGNC:244;HGNC:20879;HGNC:10003;HGNC:4401;HGNC:25412;HGNC:9612;HGNC:10469;HGNC:9401;HGNC:947;HGNC:24600;HGNC:11140;HGNC:7734;HGNC:7739;HGNC:4687;HGNC:12669;HGNC:815;HGNC:10596;HGNC:4572;HGNC:9706;HGNC:4845;HGNC:4573;HGNC:8996;HGNC:2973;HGNC:15514;HGNC:14986;HGNC:15469;HGNC:12645;HGNC:9394;HGNC:11496;HGNC:17056;HGNC:1052;HGNC:8…	ROGDI;CPLX1;SPTBN2;AMPH;VAMP1;AAK1;AP1G1;ADD2;CASKIN1;RGS7;GNB5;SGIP1;PTK2B;RTN3;PRKCE;BAIAP2;ANKS1B;SNCB;NEFM;NEFL;GUCY1B1;VDAC1;ATP2B2;SCN8A;GRIA2;NECTIN1;HCN1;GRIA3;PIP5K1C;DNM1L;PICALM;SNAP91;DNAJC6;VAMP4;PICK1;SYN3;RPH3A;BIN1;ATP6V1C1;ATP6V1D;ATP6V1F;ATP6V1H;SLC30A3;SYT2;SYT12;SNPH;PRRT2;SNAP25;KCNA2;ADAM23;SYT7;PTPRD	ROGDI;CPLX1;SPTBN2;AMPH;VAMP1;AAK1;AP1G1;ADD2;CASKIN1;RGS7;GNB5;SGIP1;PTK2B;RTN3;PRKCE;BAIAP2;ANKS1B;SNCB;NEFM;NEFL;GUCY1B1;VDAC1;ATP2B2;SCN8A;GRIA2;NECTIN1;HCN1;GRIA3;PIP5K1C;DNM1L;PICALM;SNAP91;DNAJC6;VAMP4;PICK1;SYN3;RPH3A;BIN1;ATP6V1C1;ATP6V1D;ATP6V1F;ATP6V1H;SLC30A3;SYT2;SYT12;SNPH;PRRT2;SNAP25;KCNA2;ADAM23;SYT7;PTPRD
GO:0099523	B2	CC	presynaptic cytosol	│ ├─ presynaptic cytosol	GO:0098793	0.446042	0.463884	HGNC:9401;HGNC:947;HGNC:24600;HGNC:11140	PRKCE;BAIAP2;ANKS1B;SNCB	PRKCE;BAIAP2;ANKS1B;SNCB
GO:0099569	B3	CC	presynaptic cytoskeleton	│ ├─ presynaptic cytoskeleton	GO:0098793			HGNC:7734;HGNC:7739	NEFM;NEFL	NEFM;NEFL
GO:0099182	B12	CC	presynaptic intermediate filament cytoskeleton	│ │ ├─ presynaptic intermediate filament cytoskeleton	GO:0099569			HGNC:7734;HGNC:7739	NEFM;NEFL	NEFM;NEFL
GO:0099143	B13	CC	presynaptic actin cytoskeleton	│ │ └─ presynaptic actin cytoskeleton	GO:0099569
GO:0048786	B4	CC	presynaptic active zone	│ ├─ presynaptic active zone	GO:0098793	0.309249	0.349586	HGNC:4687;HGNC:12669;HGNC:815;HGNC:10596;HGNC:4572;HGNC:9706;HGNC:4845;HGNC:4573	GUCY1B1;VDAC1;ATP2B2;SCN8A;GRIA2;NECTIN1;HCN1;GRIA3	GUCY1B1;VDAC1;ATP2B2;SCN8A;GRIA2;NECTIN1;HCN1;GRIA3
GO:0098831	B14	CC	presynaptic active zone cytoplasmic component	│ │ ├─ presynaptic active zone cytoplasmic component	GO:0048786			HGNC:4687	GUCY1B1	GUCY1B1
GO:0048787	B15	CC	presynaptic active zone membrane	│ │ └─ presynaptic active zone membrane	GO:0048786	0.0835858	0.144882	HGNC:12669;HGNC:815;HGNC:10596;HGNC:4572;HGNC:9706;HGNC:4845;HGNC:4573	VDAC1;ATP2B2;SCN8A;GRIA2;NECTIN1;HCN1;GRIA3	VDAC1;ATP2B2;SCN8A;GRIA2;NECTIN1;HCN1;GRIA3
GO:0099029	B27	CC	anchored component of presynaptic active zone membrane	│ │ ├─ anchored component of presynaptic active zone membrane	GO:0048787
GO:0098891	B28	CC	extrinsic component of presynaptic active zone membrane	│ │ ├─ extrinsic component of presynaptic active zone membrane	GO:0048787
GO:0099059	B29	CC	integral component of presynaptic active zone membrane	│ │ └─ integral component of presynaptic active zone membrane	GO:0048787	0.041769	0.0904995	HGNC:815;HGNC:10596;HGNC:4572;HGNC:9706;HGNC:4845;HGNC:4573	ATP2B2;SCN8A;GRIA2;NECTIN1;HCN1;GRIA3	ATP2B2;SCN8A;GRIA2;NECTIN1;HCN1;GRIA3
GO:0098833	B5	CC	presynaptic endocytic zone	│ ├─ presynaptic endocytic zone	GO:0098793	0.0854358		HGNC:471;HGNC:8996;HGNC:2973;HGNC:15514;HGNC:14986;HGNC:15469	AMPH;PIP5K1C;DNM1L;PICALM;SNAP91;DNAJC6	AMPH;PIP5K1C;DNM1L;PICALM;SNAP91;DNAJC6
GO:0098835	B16	CC	presynaptic endocytic zone membrane	│ │ └─ presynaptic endocytic zone membrane	GO:0098833	0.041769	0.0904995	HGNC:8996;HGNC:2973;HGNC:15514;HGNC:14986;HGNC:471;HGNC:15469	PIP5K1C;DNM1L;PICALM;SNAP91;AMPH;DNAJC6	PIP5K1C;DNM1L;PICALM;SNAP91;AMPH;DNAJC6
GO:0098894	B30	CC	extrinsic component of presynaptic endocytic zone membrane	│ │ └─ extrinsic component of presynaptic endocytic zone membrane	GO:0098835	0.0791876	0.144882	HGNC:15514;HGNC:14986;HGNC:471;HGNC:15469	PICALM;SNAP91;AMPH;DNAJC6	PICALM;SNAP91;AMPH;DNAJC6
GO:0098830	B6	CC	presynaptic endosome	│ ├─ presynaptic endosome	GO:0098793			HGNC:12645	VAMP4	VAMP4
GO:0098954	B17	CC	presynaptic endosome membrane	│ │ └─ presynaptic endosome membrane	GO:0098830			HGNC:12645	VAMP4	VAMP4
GO:0099067	B31	CC	integral component of presynaptic endosome membrane	│ │ └─ integral component of presynaptic endosome membrane	GO:0098954			HGNC:12645	VAMP4	VAMP4
GO:0008021	B7	CC	synaptic vesicle	│ ├─ synaptic vesicle	GO:0098793	0.281647	0.348705	HGNC:9394;HGNC:2973;HGNC:471;HGNC:11496;HGNC:17056;HGNC:1052;HGNC:856;HGNC:13527;HGNC:16832;HGNC:18303;HGNC:12642;HGNC:11014;HGNC:11510;HGNC:18381	PICK1;DNM1L;AMPH;SYN3;RPH3A;BIN1;ATP6V1C1;ATP6V1D;ATP6V1F;ATP6V1H;VAMP1;SLC30A3;SYT2;SYT12	PICK1;DNM1L;AMPH;SYN3;RPH3A;BIN1;ATP6V1C1;ATP6V1D;ATP6V1F;ATP6V1H;VAMP1;SLC30A3;SYT2;SYT12
GO:0034592	B18	CC	synaptic vesicle lumen	│ │ ├─ synaptic vesicle lumen	GO:0008021
GO:0030672	B19	CC	synaptic vesicle membrane	│ │ └─ synaptic vesicle membrane	GO:0008021	0.210848	0.284773	HGNC:2973;HGNC:471;HGNC:11496;HGNC:17056;HGNC:1052;HGNC:856;HGNC:13527;HGNC:16832;HGNC:18303;HGNC:12642;HGNC:11014;HGNC:11510;HGNC:18381	DNM1L;AMPH;SYN3;RPH3A;BIN1;ATP6V1C1;ATP6V1D;ATP6V1F;ATP6V1H;VAMP1;SLC30A3;SYT2;SYT12	DNM1L;AMPH;SYN3;RPH3A;BIN1;ATP6V1C1;ATP6V1D;ATP6V1F;ATP6V1H;VAMP1;SLC30A3;SYT2;SYT12
GO:0098993	B32	CC	anchored component of synaptic vesicle membrane	│ │ ├─ anchored component of synaptic vesicle membrane	GO:0030672
GO:0098850	B33	CC	extrinsic component of synaptic vesicle membrane	│ │ ├─ extrinsic component of synaptic vesicle membrane	GO:0030672	0.01186	0.030836	HGNC:471;HGNC:11496;HGNC:17056;HGNC:1052;HGNC:856;HGNC:13527;HGNC:16832;HGNC:18303	AMPH;SYN3;RPH3A;BIN1;ATP6V1C1;ATP6V1D;ATP6V1F;ATP6V1H	AMPH;SYN3;RPH3A;BIN1;ATP6V1C1;ATP6V1D;ATP6V1F;ATP6V1H
GO:0030285	B34	CC	integral component of synaptic vesicle membrane	│ │ └─ integral component of synaptic vesicle membrane	GO:0030672	0.580261	0.580261	HGNC:12642;HGNC:11014;HGNC:11510;HGNC:18381	VAMP1;SLC30A3;SYT2;SYT12	VAMP1;SLC30A3;SYT2;SYT12
GO:0098992	B8	CC	neuronal dense core vesicle	│ ├─ neuronal dense core vesicle	GO:0098793
GO:0099013	B20	CC	neuronal dense core vesicle lumen	│ │ ├─ neuronal dense core vesicle lumen	GO:0098992
GO:0099012	B21	CC	neuronal dense core vesicle membrane	│ │ └─ neuronal dense core vesicle membrane	GO:0098992
GO:0098674	B35	CC	extrinsic component of neuronal dense core vesicle membrane	│ │ ├─ extrinsic component of neuronal dense core vesicle membrane	GO:0099012
GO:0099066	B36	CC	integral component of neuronal dense core vesicle membrane	│ │ └─ integral component of neuronal dense core vesicle membrane	GO:0099012
GO:0042734	B9	CC	presynaptic membrane	│ ├─ presynaptic membrane	GO:0098793	0.121038	0.196687	HGNC:815;HGNC:15931;HGNC:30500;HGNC:11132;HGNC:6220;HGNC:202;HGNC:4572;HGNC:4573;HGNC:11514;HGNC:9668	ATP2B2;SNPH;PRRT2;SNAP25;KCNA2;ADAM23;GRIA2;GRIA3;SYT7;PTPRD	ATP2B2;SNPH;PRRT2;SNAP25;KCNA2;ADAM23;GRIA2;GRIA3;SYT7;PTPRD
GO:0099026	B22	CC	anchored component of presynaptic membrane	│ │ ├─ anchored component of presynaptic membrane	GO:0042734			HGNC:11132	SNAP25	SNAP25
GO:0098888	B23	CC	extrinsic component of presynaptic membrane	│ │ ├─ extrinsic component of presynaptic membrane	GO:0042734			HGNC:11132	SNAP25	SNAP25
GO:0099056	B24	CC	integral component of presynaptic membrane	│ │ └─ integral component of presynaptic membrane	GO:0042734	0.185857	0.26846	HGNC:6220;HGNC:202;HGNC:4572;HGNC:4573;HGNC:11514;HGNC:30500;HGNC:9668	KCNA2;ADAM23;GRIA2;GRIA3;SYT7;PRRT2;PTPRD	KCNA2;ADAM23;GRIA2;GRIA3;SYT7;PRRT2;PTPRD
SYNGO:presyn_ribosome	B10	CC	presynaptic ribosome	│ ├─ presynaptic ribosome	GO:0098793
SYNGO:presyn_er	B11	CC	presynaptic ER	│ └─ presynaptic ER	GO:0098793
SYNGO:presyn_er_membrane	B25	CC	presynaptic ER membrane	│ ├─ presynaptic ER membrane	SYNGO:presyn_er
SYNGO:presyn_er_membrane_integral	B37	CC	integral component of presynaptic ER membrane	│ │ └─ integral component of presynaptic ER membrane	SYNGO:presyn_er_membrane
SYNGO:presyn_ser	B26	CC	presynaptic SER	│ └─ presynaptic SER	SYNGO:presyn_er
SYNGO:presyn_ser_membrane	B38	CC	presynaptic SER membrane	│ └─ presynaptic SER membrane	SYNGO:presyn_ser
SYNGO:presyn_ser_membrane_integral	B39	CC	integral component of presynaptic SER membrane	│ └─ integral component of presynaptic SER membrane	SYNGO:presyn_ser_membrane
GO:0043083	C1	CC	synaptic cleft	├─ synaptic cleft	GO:0045202			HGNC:613;HGNC:6572	APOE;LGI1	APOE;LGI1
GO:0098965	C2	CC	extracellular matrix of synaptic cleft	│ └─ extracellular matrix of synaptic cleft	GO:0043083
GO:0098794	D1	CC	postsynapse	├─ postsynapse	GO:0045202	0.00892539	0.030836	HGNC:12732;HGNC:2309;HGNC:1464;HGNC:8590;HGNC:6057;HGNC:15514;HGNC:9612;HGNC:244;HGNC:16921;HGNC:682;HGNC:7807;HGNC:6839;HGNC:17512;HGNC:947;HGNC:15917;HGNC:7734;HGNC:7739;HGNC:7737;HGNC:24011;HGNC:164;HGNC:6178;HGNC:11276;HGNC:30672;HGNC:17447;HGNC:9394;HGNC:15465;HGNC:8592;HGNC:14295;HGNC:14294;HGNC:24600;HGNC:1461;HGNC:8996;HGNC:16923;HGNC:11497;HGNC:2905;HGNC:2900;HGNC:2902;HGNC:28379;HGNC:72…	WASF1;CPLX1;CAMK4;PAK1;INA;PICALM;PTK2B;ADD2;AGAP2;ARHGEF2;NGEF;MAP2;HOMER1;BAIAP2;PLCB1;NEFM;NEFL;NEFH;ABI2;ACTN2;ITPKA;SPTBN2;SYNPO;CLSTN1;PICK1;GPHN;PAK3;SHANK2;SHANK3;ANKS1B;CAMK2B;PIP5K1C;AGAP3;SYNGAP1;DLGAP1;DLG1;DLG3;FAM81A;MPP2;ATP2B2;ADAM22;SCN8A;GRIA2;CACNG3;CACNG8;GRIA3;VDAC1;KCNAB2;IGSF9B;SH3GLB2;GRIPAP1;SNAP91;RGS7;KCNA2;CSPG5;HCN1	WASF1;CPLX1;CAMK4;PAK1;INA;PICALM;PTK2B;ADD2;AGAP2;ARHGEF2;NGEF;MAP2;HOMER1;BAIAP2;PLCB1;NEFM;NEFL;NEFH;ABI2;ACTN2;ITPKA;SPTBN2;SYNPO;CLSTN1;PICK1;GPHN;PAK3;SHANK2;SHANK3;ANKS1B;CAMK2B;PIP5K1C;AGAP3;SYNGAP1;DLGAP1;DLG1;DLG3;FAM81A;MPP2;ATP2B2;ADAM22;SCN8A;GRIA2;CACNG3;CACNG8;GRIA3;VDAC1;KCNAB2;IGSF9B;SH3GLB2;GRIPAP1;SNAP91;RGS7;KCNA2;CSPG5;HCN1
GO:0099524	D2	CC	postsynaptic cytosol	│ ├─ postsynaptic cytosol	GO:0098794	0.409913	0.444073	HGNC:17512;HGNC:947;HGNC:15917	HOMER1;BAIAP2;PLCB1	HOMER1;BAIAP2;PLCB1
GO:0099571	D3	CC	postsynaptic cytoskeleton	│ ├─ postsynaptic cytoskeleton	GO:0098794	0.01186	0.030836	HGNC:6057;HGNC:7734;HGNC:7739;HGNC:7737;HGNC:24011;HGNC:164;HGNC:6178;HGNC:11276	INA;NEFM;NEFL;NEFH;ABI2;ACTN2;ITPKA;SPTBN2	INA;NEFM;NEFL;NEFH;ABI2;ACTN2;ITPKA;SPTBN2
GO:0099160	D12	CC	postsynaptic intermediate filament cytoskeleton	│ │ ├─ postsynaptic intermediate filament cytoskeleton	GO:0099571	0.00995738	0.030836	HGNC:6057;HGNC:7734;HGNC:7739;HGNC:7737	INA;NEFM;NEFL;NEFH	INA;NEFM;NEFL;NEFH
GO:0098871	D13	CC	postsynaptic actin cytoskeleton	│ │ ├─ postsynaptic actin cytoskeleton	GO:0099571	0.305236	0.349586	HGNC:24011;HGNC:164;HGNC:6178	ABI2;ACTN2;ITPKA	ABI2;ACTN2;ITPKA
GO:0150050	D14	CC	postsynaptic septin cytoskeleton	│ │ ├─ postsynaptic septin cytoskeleton	GO:0099571
GO:0099189	D15	CC	postsynaptic spectrin-associated cytoskeleton	│ │ └─ postsynaptic spectrin-associated cytoskeleton	GO:0099571			HGNC:11276	SPTBN2	SPTBN2
GO:0097444	D4	CC	spine apparatus	│ ├─ spine apparatus	GO:0098794			HGNC:30672;HGNC:17447	SYNPO;CLSTN1	SYNPO;CLSTN1
GO:0098897	D16	CC	spine apparatus membrane	│ │ └─ spine apparatus membrane	GO:0097444			HGNC:17447	CLSTN1	CLSTN1
GO:0099065	D30	CC	integral component of spine apparatus membrane	│ │ └─ integral component of spine apparatus membrane	GO:0098897			HGNC:17447	CLSTN1	CLSTN1
GO:0150051	D5	CC	postsynaptic Golgi apparatus	│ ├─ postsynaptic Golgi apparatus	GO:0098794
GO:0099572	D6	CC	postsynaptic specialization	│ ├─ postsynaptic specialization	GO:0098794	0.000863746	0.00929098	HGNC:9394;HGNC:15465;HGNC:17512;HGNC:8590;HGNC:8592;HGNC:14295;HGNC:14294;HGNC:24600;HGNC:1461;HGNC:8996;HGNC:16923;HGNC:11497;HGNC:947;HGNC:2905;HGNC:682;HGNC:164;HGNC:2900;HGNC:2902;HGNC:6057;HGNC:9612;HGNC:28379;HGNC:7220;HGNC:815;HGNC:201;HGNC:10596;HGNC:4572;HGNC:1407;HGNC:13628;HGNC:4573;HGNC:17447;HGNC:12669;HGNC:6229;HGNC:32326	PICK1;GPHN;HOMER1;PAK1;PAK3;SHANK2;SHANK3;ANKS1B;CAMK2B;PIP5K1C;AGAP3;SYNGAP1;BAIAP2;DLGAP1;ARHGEF2;ACTN2;DLG1;DLG3;INA;PTK2B;FAM81A;MPP2;ATP2B2;ADAM22;SCN8A;GRIA2;CACNG3;CACNG8;GRIA3;CLSTN1;VDAC1;KCNAB2;IGSF9B	PICK1;GPHN;HOMER1;PAK1;PAK3;SHANK2;SHANK3;ANKS1B;CAMK2B;PIP5K1C;AGAP3;SYNGAP1;BAIAP2;DLGAP1;ARHGEF2;ACTN2;DLG1;DLG3;INA;PTK2B;FAM81A;MPP2;ATP2B2;ADAM22;SCN8A;GRIA2;CACNG3;CACNG8;GRIA3;CLSTN1;VDAC1;KCNAB2;IGSF9B
GO:0099091	D17	CC	postsynaptic specialization, intracellular component	│ │ ├─ postsynaptic specialization, intracellular component	GO:0099572			HGNC:15465	GPHN	GPHN
GO:0099634	D18	CC	postsynaptic specialization membrane	│ │ ├─ postsynaptic specialization membrane	GO:0099572
GO:0098892	D31	CC	extrinsic component of postsynaptic specialization membrane	│ │ │ ├─ extrinsic component of postsynaptic specialization membrane	GO:0099634
GO:0099060	D32	CC	integral component of postsynaptic specialization membrane	│ │ │ └─ integral component of postsynaptic specialization membrane	GO:0099634
GO:0014069	D19	CC	postsynaptic density	│ │ ├─ postsynaptic density	GO:0099572	0.00138105	0.00929098	HGNC:17512;HGNC:8590;HGNC:8592;HGNC:14295;HGNC:14294;HGNC:24600;HGNC:1461;HGNC:8996;HGNC:16923;HGNC:11497;HGNC:947;HGNC:2905;HGNC:682;HGNC:164;HGNC:2900;HGNC:2902;HGNC:6057;HGNC:9612;HGNC:28379;HGNC:7220;HGNC:815;HGNC:201;HGNC:10596;HGNC:4572;HGNC:1407;HGNC:13628;HGNC:4573;HGNC:17447;HGNC:12669;HGNC:6229	HOMER1;PAK1;PAK3;SHANK2;SHANK3;ANKS1B;CAMK2B;PIP5K1C;AGAP3;SYNGAP1;BAIAP2;DLGAP1;ARHGEF2;ACTN2;DLG1;DLG3;INA;PTK2B;FAM81A;MPP2;ATP2B2;ADAM22;SCN8A;GRIA2;CACNG3;CACNG8;GRIA3;CLSTN1;VDAC1;KCNAB2	HOMER1;PAK1;PAK3;SHANK2;SHANK3;ANKS1B;CAMK2B;PIP5K1C;AGAP3;SYNGAP1;BAIAP2;DLGAP1;ARHGEF2;ACTN2;DLG1;DLG3;INA;PTK2B;FAM81A;MPP2;ATP2B2;ADAM22;SCN8A;GRIA2;CACNG3;CACNG8;GRIA3;CLSTN1;VDAC1;KCNAB2
GO:0099092	D33	CC	postsynaptic density, intracellular component	│ │ │ ├─ postsynaptic density, intracellular component	GO:0014069	0.00117942	0.00929098	HGNC:14294;HGNC:11497;HGNC:947;HGNC:24600;HGNC:2905;HGNC:682;HGNC:164;HGNC:2900;HGNC:2902;HGNC:6057;HGNC:9612;HGNC:28379	SHANK3;SYNGAP1;BAIAP2;ANKS1B;DLGAP1;ARHGEF2;ACTN2;DLG1;DLG3;INA;PTK2B;FAM81A	SHANK3;SYNGAP1;BAIAP2;ANKS1B;DLGAP1;ARHGEF2;ACTN2;DLG1;DLG3;INA;PTK2B;FAM81A
GO:0098839	D34	CC	postsynaptic density membrane	│ │ │ └─ postsynaptic density membrane	GO:0014069	0.00194217	0.0100993	HGNC:164;HGNC:7220;HGNC:815;HGNC:201;HGNC:10596;HGNC:4572;HGNC:1407;HGNC:13628;HGNC:4573;HGNC:17447;HGNC:12669;HGNC:6229	ACTN2;MPP2;ATP2B2;ADAM22;SCN8A;GRIA2;CACNG3;CACNG8;GRIA3;CLSTN1;VDAC1;KCNAB2	ACTN2;MPP2;ATP2B2;ADAM22;SCN8A;GRIA2;CACNG3;CACNG8;GRIA3;CLSTN1;VDAC1;KCNAB2
GO:0099031	D40	CC	anchored component of postsynaptic density membrane	│ │ │ ├─ anchored component of postsynaptic density membrane	GO:0098839			HGNC:7220	MPP2	MPP2
GO:0099147	D41	CC	extrinsic component of postsynaptic density membrane	│ │ │ ├─ extrinsic component of postsynaptic density membrane	GO:0098839
GO:0099061	D42	CC	integral component of postsynaptic density membrane	│ │ │ └─ integral component of postsynaptic density membrane	GO:0098839	0.00142938	0.00929098	HGNC:815;HGNC:201;HGNC:10596;HGNC:4572;HGNC:1407;HGNC:13628;HGNC:4573;HGNC:17447;HGNC:12669;HGNC:6229	ATP2B2;ADAM22;SCN8A;GRIA2;CACNG3;CACNG8;GRIA3;CLSTN1;VDAC1;KCNAB2	ATP2B2;ADAM22;SCN8A;GRIA2;CACNG3;CACNG8;GRIA3;CLSTN1;VDAC1;KCNAB2
GO:0099629	D20	CC	postsynaptic specialization of symmetric synapse	│ │ └─ postsynaptic specialization of symmetric synapse	GO:0099572			HGNC:32326	IGSF9B	IGSF9B
GO:0098843	D7	CC	postsynaptic endocytic zone	│ ├─ postsynaptic endocytic zone	GO:0098794			HGNC:10834;HGNC:9394	SH3GLB2;PICK1	SH3GLB2;PICK1
GO:0098844	D21	CC	postsynaptic endocytic zone membrane	│ │ └─ postsynaptic endocytic zone membrane	GO:0098843
GO:0098845	D8	CC	postsynaptic endosome	│ ├─ postsynaptic endosome	GO:0098794			HGNC:17447;HGNC:18706	CLSTN1;GRIPAP1	CLSTN1;GRIPAP1
GO:0098895	D22	CC	postsynaptic endosome membrane	│ │ ├─ postsynaptic endosome membrane	GO:0098845
GO:0098999	D35	CC	extrinsic component of postsynaptic endosome membrane	│ │ │ └─ extrinsic component of postsynaptic endosome membrane	GO:0098895
GO:0098842	D23	CC	postsynaptic early endosome	│ │ ├─ postsynaptic early endosome	GO:0098845			HGNC:18706	GRIPAP1	GRIPAP1
GO:0098896	D36	CC	postsynaptic early endosome membrane	│ │ │ └─ postsynaptic early endosome membrane	GO:0098842			HGNC:18706	GRIPAP1	GRIPAP1
GO:0098998	D43	CC	extrinsic component of postsynaptic early endosome membrane	│ │ │ └─ extrinsic component of postsynaptic early endosome membrane	GO:0098896			HGNC:18706	GRIPAP1	GRIPAP1
GO:0098837	D24	CC	postsynaptic recycling endosome	│ │ └─ postsynaptic recycling endosome	GO:0098845
GO:0098944	D37	CC	postsynaptic recycling endosome membrane	│ │ └─ postsynaptic recycling endosome membrane	GO:0098837
GO:0099033	D44	CC	anchored component of postsynaptic recycling endosome membrane	│ │ └─ anchored component of postsynaptic recycling endosome membrane	GO:0098944
GO:0045211	D9	CC	postsynaptic membrane	│ ├─ postsynaptic membrane	GO:0098794	0.219056	0.284773	HGNC:14986;HGNC:10003;HGNC:815;HGNC:6220;HGNC:4572;HGNC:4573;HGNC:2467;HGNC:4845	SNAP91;RGS7;ATP2B2;KCNA2;GRIA2;GRIA3;CSPG5;HCN1	SNAP91;RGS7;ATP2B2;KCNA2;GRIA2;GRIA3;CSPG5;HCN1
GO:0099025	D25	CC	anchored component of postsynaptic membrane	│ │ ├─ anchored component of postsynaptic membrane	GO:0045211
GO:0098890	D26	CC	extrinsic component of postsynaptic membrane	│ │ ├─ extrinsic component of postsynaptic membrane	GO:0045211
GO:0099055	D27	CC	integral component of postsynaptic membrane	│ │ └─ integral component of postsynaptic membrane	GO:0045211	0.16479	0.252032	HGNC:815;HGNC:6220;HGNC:4572;HGNC:4573;HGNC:2467;HGNC:4845	ATP2B2;KCNA2;GRIA2;GRIA3;CSPG5;HCN1	ATP2B2;KCNA2;GRIA2;GRIA3;CSPG5;HCN1
SYNGO:postsyn_ribosome	D10	CC	postsynaptic ribosome	│ ├─ postsynaptic ribosome	GO:0098794
SYNGO:postsyn_er	D11	CC	postsynaptic ER	│ └─ postsynaptic ER	GO:0098794
SYNGO:postsyn_er_membrane	D28	CC	postsynaptic ER membrane	│ ├─ postsynaptic ER membrane	SYNGO:postsyn_er
SYNGO:postsyn_er_membrane_integral	D38	CC	integral component of postsynaptic ER membrane	│ │ └─ integral component of postsynaptic ER membrane	SYNGO:postsyn_er_membrane
SYNGO:postsyn_ser	D29	CC	postsynaptic SER	│ └─ postsynaptic SER	SYNGO:postsyn_er
SYNGO:postsyn_ser_membrane	D39	CC	postsynaptic SER membrane	│ └─ postsynaptic SER membrane	SYNGO:postsyn_ser
SYNGO:postsyn_ser_membrane_integral	D45	CC	integral component of postsynaptic SER membrane	│ └─ integral component of postsynaptic SER membrane	SYNGO:postsyn_ser_membrane
GO:0099544	E1	CC	extrasynaptic space	└─ extrasynaptic space	GO:0045202
GO:0098966	E2	CC	perisynaptic extracellular matrix	└─ perisynaptic extracellular matrix	GO:0099544
SYNGO:synprocess		BP	process in the synapse	process in the synapse		0.000427849	0.00684559	HGNC:4572;HGNC:4573;HGNC:6220;HGNC:4845;HGNC:19679;HGNC:11496;HGNC:24011;HGNC:555;HGNC:12645;HGNC:11132;HGNC:18539;HGNC:11514;HGNC:11510;HGNC:30500;HGNC:2467;HGNC:12642;HGNC:2309;HGNC:17056;HGNC:11014;HGNC:856;HGNC:13527;HGNC:16832;HGNC:18303;HGNC:14986;HGNC:15514;HGNC:471;HGNC:1052;HGNC:2973;HGNC:11140;HGNC:8996;HGNC:15469;HGNC:9401;HGNC:30672;HGNC:815;HGNC:10003;HGNC:17512;HGNC:2902;HGNC:13628;…	GRIA2;GRIA3;KCNA2;HCN1;AAK1;SYN3;ABI2;AP1G1;VAMP4;SNAP25;STX1B;SYT7;SYT2;PRRT2;CSPG5;VAMP1;CPLX1;RPH3A;SLC30A3;ATP6V1C1;ATP6V1D;ATP6V1F;ATP6V1H;SNAP91;PICALM;AMPH;BIN1;DNM1L;SNCB;PIP5K1C;DNAJC6;PRKCE;SYNPO;ATP2B2;RGS7;HOMER1;DLG3;CACNG8;AGAP3;GPHN;ADAM22;LGI1;DLG1;CACNG3;PAK1;PAK3;SH3GLB2;SIRT2;PICK1;CAMK4;ANKS1B;PTPRD;PLCB1;BAIAP2;VGF;SYNGAP1;SHANK3;DLGAP1;SYT12;PPP3CA;INA;NEFL;NEFH;PTK2B;SPTBN2…	GRIA2;GRIA3;KCNA2;HCN1;AAK1;SYN3;ABI2;AP1G1;VAMP4;SNAP25;STX1B;SYT7;SYT2;PRRT2;CSPG5;VAMP1;CPLX1;RPH3A;SLC30A3;ATP6V1C1;ATP6V1D;ATP6V1F;ATP6V1H;SNAP91;PICALM;AMPH;BIN1;DNM1L;SNCB;PIP5K1C;DNAJC6;PRKCE;SYNPO;ATP2B2;RGS7;HOMER1;DLG3;CACNG8;AGAP3;GPHN;ADAM22;LGI1;DLG1;CACNG3;PAK1;PAK3;SH3GLB2;SIRT2;PICK1;CAMK4;ANKS1B;PTPRD;PLCB1;BAIAP2;VGF;SYNGAP1;SHANK3;DLGAP1;SYT12;PPP3CA;INA;NEFL;NEFH;PTK2B;SPTBN2…
SYNGO:presynprocess	F1	BP	process in the presynapse	├─ process in the presynapse	SYNGO:synprocess	0.0118981	0.0543914	HGNC:4572;HGNC:4573;HGNC:6220;HGNC:4845;HGNC:19679;HGNC:11496;HGNC:24011;HGNC:555;HGNC:12645;HGNC:11132;HGNC:18539;HGNC:11514;HGNC:11510;HGNC:30500;HGNC:2467;HGNC:12642;HGNC:2309;HGNC:17056;HGNC:11014;HGNC:856;HGNC:13527;HGNC:16832;HGNC:18303;HGNC:14986;HGNC:15514;HGNC:471;HGNC:1052;HGNC:2973;HGNC:11140;HGNC:8996;HGNC:15469;HGNC:9401	GRIA2;GRIA3;KCNA2;HCN1;AAK1;SYN3;ABI2;AP1G1;VAMP4;SNAP25;STX1B;SYT7;SYT2;PRRT2;CSPG5;VAMP1;CPLX1;RPH3A;SLC30A3;ATP6V1C1;ATP6V1D;ATP6V1F;ATP6V1H;SNAP91;PICALM;AMPH;BIN1;DNM1L;SNCB;PIP5K1C;DNAJC6;PRKCE	GRIA2;GRIA3;KCNA2;HCN1;AAK1;SYN3;ABI2;AP1G1;VAMP4;SNAP25;STX1B;SYT7;SYT2;PRRT2;CSPG5;VAMP1;CPLX1;RPH3A;SLC30A3;ATP6V1C1;ATP6V1D;ATP6V1F;ATP6V1H;SNAP91;PICALM;AMPH;BIN1;DNM1L;SNCB;PIP5K1C;DNAJC6;PRKCE
GO:0099509	F2	BP	regulation of presynaptic cytosolic calcium levels	│ ├─ regulation of presynaptic cytosolic calcium levels	SYNGO:presynprocess
GO:1905056	F11	BP	ATPase-coupled calcium ion transmembrane transporter activity involved in regulation of presynaptic cytosolic calcium levels	│ │ ├─ ATPase-coupled calcium ion transmembrane transporter activity involved in regulation of presynaptic cytosolic calcium levels	GO:0099509
GO:0099534	F12	BP	calcium ion binding involved in regulation of presynaptic cytosolic calcium levels	│ │ ├─ calcium ion binding involved in regulation of presynaptic cytosolic calcium levels	GO:0099509
GO:0099626	F13	BP	voltage-gated calcium channel activity involved in regulation of presynaptic cytosolic calcium levels	│ │ └─ voltage-gated calcium channel activity involved in regulation of presynaptic cytosolic calcium levels	GO:0099509
GO:0099505	F3	BP	regulation of presynaptic membrane potential	│ ├─ regulation of presynaptic membrane potential	SYNGO:presynprocess	0.0791876	0.140778	HGNC:4572;HGNC:4573;HGNC:6220;HGNC:4845	GRIA2;GRIA3;KCNA2;HCN1	GRIA2;GRIA3;KCNA2;HCN1
GO:0099507	F14	BP	ligand-gated ion channel activity involved in regulation of presynaptic membrane potential	│ │ ├─ ligand-gated ion channel activity involved in regulation of presynaptic membrane potential	GO:0099505			HGNC:4572;HGNC:4573	GRIA2;GRIA3	GRIA2;GRIA3
GO:0099508	F15	BP	voltage-gated ion channel activity involved in regulation of presynaptic membrane potential	│ │ ├─ voltage-gated ion channel activity involved in regulation of presynaptic membrane potential	GO:0099505			HGNC:6220	KCNA2	KCNA2
GO:0150047	F16	BP	G protein-coupled neurotransmitter receptor activity involved in regulation of presynaptic membrane potential	│ │ ├─ G protein-coupled neurotransmitter receptor activity involved in regulation of presynaptic membrane potential	GO:0099505
GO:0140232	F17	BP	intracellular cAMP-activated cation channel activity involved in regulation of presynaptic membrane potential	│ │ └─ intracellular cAMP-activated cation channel activity involved in regulation of presynaptic membrane potential	GO:0099505			HGNC:4845	HCN1	HCN1
GO:0140238	F4	BP	presynaptic endocytosis	│ ├─ presynaptic endocytosis	SYNGO:presynprocess			HGNC:19679	AAK1	AAK1
GO:0099504	F5	BP	synaptic vesicle cycle	│ ├─ synaptic vesicle cycle	SYNGO:presynprocess	0.0250684	0.0668936	HGNC:11496;HGNC:24011;HGNC:555;HGNC:12645;HGNC:11132;HGNC:18539;HGNC:11514;HGNC:11510;HGNC:30500;HGNC:2467;HGNC:12642;HGNC:2309;HGNC:17056;HGNC:11014;HGNC:856;HGNC:13527;HGNC:16832;HGNC:18303;HGNC:14986;HGNC:15514;HGNC:471;HGNC:1052;HGNC:2973;HGNC:11140;HGNC:8996;HGNC:15469	SYN3;ABI2;AP1G1;VAMP4;SNAP25;STX1B;SYT7;SYT2;PRRT2;CSPG5;VAMP1;CPLX1;RPH3A;SLC30A3;ATP6V1C1;ATP6V1D;ATP6V1F;ATP6V1H;SNAP91;PICALM;AMPH;BIN1;DNM1L;SNCB;PIP5K1C;DNAJC6	SYN3;ABI2;AP1G1;VAMP4;SNAP25;STX1B;SYT7;SYT2;PRRT2;CSPG5;VAMP1;CPLX1;RPH3A;SLC30A3;ATP6V1C1;ATP6V1D;ATP6V1F;ATP6V1H;SNAP91;PICALM;AMPH;BIN1;DNM1L;SNCB;PIP5K1C;DNAJC6
GO:0098693	F18	BP	regulation of synaptic vesicle cycle	│ │ ├─ regulation of synaptic vesicle cycle	GO:0099504
GO:0097091	F19	BP	synaptic vesicle clustering	│ │ ├─ synaptic vesicle clustering	GO:0099504			HGNC:11496;HGNC:24011	SYN3;ABI2	SYN3;ABI2
GO:0099532	F20	BP	synaptic vesicle endosomal processing	│ │ ├─ synaptic vesicle endosomal processing	GO:0099504			HGNC:555;HGNC:12645	AP1G1;VAMP4	AP1G1;VAMP4
GO:0016182	F29	BP	synaptic vesicle budding from endosome	│ │ │ ├─ synaptic vesicle budding from endosome	GO:0099532			HGNC:555	AP1G1	AP1G1
GO:0016189	F30	BP	synaptic vesicle to endosome fusion	│ │ │ └─ synaptic vesicle to endosome fusion	GO:0099532			HGNC:12645	VAMP4	VAMP4
GO:0016079	F21	BP	synaptic vesicle exocytosis	│ │ ├─ synaptic vesicle exocytosis	GO:0099504	0.143432	0.208629	HGNC:11132;HGNC:18539;HGNC:11514;HGNC:11510;HGNC:30500;HGNC:2467;HGNC:12642;HGNC:2309;HGNC:17056	SNAP25;STX1B;SYT7;SYT2;PRRT2;CSPG5;VAMP1;CPLX1;RPH3A	SNAP25;STX1B;SYT7;SYT2;PRRT2;CSPG5;VAMP1;CPLX1;RPH3A
GO:0099502	F31	BP	calcium-dependent activation of synaptic vesicle fusion	│ │ │ ├─ calcium-dependent activation of synaptic vesicle fusion	GO:0016079	0.0849724	0.143111	HGNC:11514;HGNC:11510;HGNC:30500	SYT7;SYT2;PRRT2	SYT7;SYT2;PRRT2
GO:0150037	F41	BP	regulation of calcium-dependent activation of synaptic vesicle fusion	│ │ │ │ └─ regulation of calcium-dependent activation of synaptic vesicle fusion	GO:0099502			HGNC:30500	PRRT2	PRRT2
GO:2000300	F32	BP	regulation of synaptic vesicle exocytosis	│ │ │ ├─ regulation of synaptic vesicle exocytosis	GO:0016079			HGNC:2467	CSPG5	CSPG5
GO:0016081	F33	BP	synaptic vesicle docking	│ │ │ ├─ synaptic vesicle docking	GO:0016079
GO:0099148	F42	BP	regulation of synaptic vesicle docking	│ │ │ │ └─ regulation of synaptic vesicle docking	GO:0016081
GO:0031629	F34	BP	synaptic vesicle fusion to presynaptic active zone membrane	│ │ │ ├─ synaptic vesicle fusion to presynaptic active zone membrane	GO:0016079	0.110882	0.177411	HGNC:18539;HGNC:12642;HGNC:2309	STX1B;VAMP1;CPLX1	STX1B;VAMP1;CPLX1
GO:0031630	F43	BP	regulation of synaptic vesicle fusion to presynaptic active zone membrane	│ │ │ │ └─ regulation of synaptic vesicle fusion to presynaptic active zone membrane	GO:0031629			HGNC:12642;HGNC:2309	VAMP1;CPLX1	VAMP1;CPLX1
GO:0016082	F35	BP	synaptic vesicle priming	│ │ │ └─ synaptic vesicle priming	GO:0016079			HGNC:12642;HGNC:17056	VAMP1;RPH3A	VAMP1;RPH3A
GO:0010807	F44	BP	regulation of synaptic vesicle priming	│ │ │ └─ regulation of synaptic vesicle priming	GO:0016082
GO:0098700	F22	BP	synaptic vesicle neurotransmitter loading	│ │ ├─ synaptic vesicle neurotransmitter loading	GO:0099504
GO:0099162	F36	BP	regulation of synaptic vesicle neurotransmitter loading	│ │ │ └─ regulation of synaptic vesicle neurotransmitter loading	GO:0098700
GO:0099180	F23	BP	zinc ion import into synaptic vesicle	│ │ ├─ zinc ion import into synaptic vesicle	GO:0099504			HGNC:11014	SLC30A3	SLC30A3
GO:0097401	F24	BP	synaptic vesicle proton loading	│ │ ├─ synaptic vesicle proton loading	GO:0099504	0.141408	0.208629	HGNC:856;HGNC:13527;HGNC:16832;HGNC:18303	ATP6V1C1;ATP6V1D;ATP6V1F;ATP6V1H	ATP6V1C1;ATP6V1D;ATP6V1F;ATP6V1H
GO:1901546	F37	BP	regulation of proton loading	│ │ │ └─ regulation of proton loading	GO:0097401
GO:0048488	F25	BP	synaptic vesicle endocytosis	│ │ └─ synaptic vesicle endocytosis	GO:0099504	0.0380113	0.0810909	HGNC:14986;HGNC:15514;HGNC:471;HGNC:1052;HGNC:2973;HGNC:555;HGNC:11140;HGNC:12645;HGNC:8996;HGNC:11514;HGNC:15469	SNAP91;PICALM;AMPH;BIN1;DNM1L;AP1G1;SNCB;VAMP4;PIP5K1C;SYT7;DNAJC6	SNAP91;PICALM;AMPH;BIN1;DNM1L;AP1G1;SNCB;VAMP4;PIP5K1C;SYT7;DNAJC6
GO:1900242	F38	BP	regulation of synaptic vesicle endocytosis	│ │ ├─ regulation of synaptic vesicle endocytosis	GO:0048488	0.202286	0.269714	HGNC:12645;HGNC:8996;HGNC:11514	VAMP4;PIP5K1C;SYT7	VAMP4;PIP5K1C;SYT7
GO:0016185	F39	BP	synaptic vesicle budding from presynaptic endocytic zone membrane	│ │ ├─ synaptic vesicle budding from presynaptic endocytic zone membrane	GO:0048488
GO:0098694	F45	BP	regulation of synaptic vesicle budding from presynaptic endocytic zone membrane	│ │ │ └─ regulation of synaptic vesicle budding from presynaptic endocytic zone membrane	GO:0016185
GO:0016191	F40	BP	synaptic vesicle uncoating	│ │ └─ synaptic vesicle uncoating	GO:0048488			HGNC:15469	DNAJC6	DNAJC6
GO:0099525	F6	BP	presynaptic dense core vesicle exocytosis	│ ├─ presynaptic dense core vesicle exocytosis	SYNGO:presynprocess			HGNC:11132;HGNC:9401	SNAP25;PRKCE	SNAP25;PRKCE
GO:0099161	F26	BP	regulation of presynaptic dense core vesicle exocytosis	│ │ └─ regulation of presynaptic dense core vesicle exocytosis	GO:0099525			HGNC:9401	PRKCE	PRKCE
GO:0001504	F7	BP	neurotransmitter uptake	│ ├─ neurotransmitter uptake	SYNGO:presynprocess
GO:0098810	F8	BP	neurotransmitter reuptake	│ ├─ neurotransmitter reuptake	SYNGO:presynprocess
GO:0051580	F27	BP	regulation of neurotransmitter uptake	│ │ └─ regulation of neurotransmitter uptake	GO:0098810
SYNGO:presyn_chaperoneProteinFolding	F9	BP	presynaptic chaperone-mediated protein folding	│ ├─ presynaptic chaperone-mediated protein folding	SYNGO:presynprocess
GO:0098928	F10	BP	presynaptic signaling pathway	│ └─ presynaptic signaling pathway	SYNGO:presynprocess
GO:0099526	F28	BP	presynapse to nucleus signaling pathway	│ └─ presynapse to nucleus signaling pathway	GO:0098928
SYNGO:postsynprocess	G1	BP	process in the postsynapse	├─ process in the postsynapse	SYNGO:synprocess	0.00233979	0.0149747	HGNC:30672;HGNC:815;HGNC:10003;HGNC:4845;HGNC:4572;HGNC:4573;HGNC:6220;HGNC:17512;HGNC:2902;HGNC:13628;HGNC:16923;HGNC:15465;HGNC:201;HGNC:6572;HGNC:2900;HGNC:1407;HGNC:8590;HGNC:8592;HGNC:2309;HGNC:10834;HGNC:10886;HGNC:8996;HGNC:9394;HGNC:1464;HGNC:24600	SYNPO;ATP2B2;RGS7;HCN1;GRIA2;GRIA3;KCNA2;HOMER1;DLG3;CACNG8;AGAP3;GPHN;ADAM22;LGI1;DLG1;CACNG3;PAK1;PAK3;CPLX1;SH3GLB2;SIRT2;PIP5K1C;PICK1;CAMK4;ANKS1B	SYNPO;ATP2B2;RGS7;HCN1;GRIA2;GRIA3;KCNA2;HOMER1;DLG3;CACNG8;AGAP3;GPHN;ADAM22;LGI1;DLG1;CACNG3;PAK1;PAK3;CPLX1;SH3GLB2;SIRT2;PIP5K1C;PICK1;CAMK4;ANKS1B
GO:0099566	G2	BP	regulation of postsynaptic cytosolic calcium levels	│ ├─ regulation of postsynaptic cytosolic calcium levels	SYNGO:postsynprocess			HGNC:30672;HGNC:815	SYNPO;ATP2B2	SYNPO;ATP2B2
GO:1905059	G8	BP	ATPase-coupled calcium ion transmembrane transporter activity involved in regulation of postsynaptic cytosolic calcium levels	│ │ ├─ ATPase-coupled calcium ion transmembrane transporter activity involved in regulation of postsynaptic cytosolic calcium levels	GO:0099566			HGNC:815	ATP2B2	ATP2B2
GO:0099567	G9	BP	calcium ion binding involved in regulation of postsynaptic cytosolic calcium levels	│ │ ├─ calcium ion binding involved in regulation of postsynaptic cytosolic calcium levels	GO:0099566
GO:1905060	G10	BP	calcium:cation antiporter activity involved in regulation of postsynaptic cytosolic calcium ion levels	│ │ ├─ calcium:cation antiporter activity involved in regulation of postsynaptic cytosolic calcium ion levels	GO:0099566
GO:0098695	G11	BP	inositol 1,4,5-trisphosphate receptor activity involved in regulation of postsynaptic cytosolic calcium levels	│ │ ├─ inositol 1,4,5-trisphosphate receptor activity involved in regulation of postsynaptic cytosolic calcium levels	GO:0099566
GO:0099583	G12	BP	neurotransmitter receptor activity involved in regulation of postsynaptic cytosolic calcium levels	│ │ └─ neurotransmitter receptor activity involved in regulation of postsynaptic cytosolic calcium levels	GO:0099566
GO:0098872	G22	BP	G-protein coupled neurotransmitter receptor activity involved in regulation of postsynaptic cytosolic calcium levels	│ │ └─ G-protein coupled neurotransmitter receptor activity involved in regulation of postsynaptic cytosolic calcium levels	GO:0099583
GO:0060078	G3	BP	regulation of postsynaptic membrane potential	│ ├─ regulation of postsynaptic membrane potential	SYNGO:postsynprocess	0.0271755	0.0668936	HGNC:10003;HGNC:4845;HGNC:4572;HGNC:4573;HGNC:6220	RGS7;HCN1;GRIA2;GRIA3;KCNA2	RGS7;HCN1;GRIA2;GRIA3;KCNA2
GO:0140233	G13	BP	intracellular cAMP-activated cation channel activity involved in regulation of postsynaptic membrane potential	│ │ ├─ intracellular cAMP-activated cation channel activity involved in regulation of postsynaptic membrane potential	GO:0060078
GO:0099579	G23	BP	G protein-coupled neurotransmitter receptor activity involved in regulation of postsynaptic membrane potential	│ │ │ └─ G protein-coupled neurotransmitter receptor activity involved in regulation of postsynaptic membrane potential	GO:0140233
GO:1904315	G14	BP	transmitter-gated ion channel activity involved in regulation of postsynaptic membrane potential	│ │ ├─ transmitter-gated ion channel activity involved in regulation of postsynaptic membrane potential	GO:0060078			HGNC:4572;HGNC:4573	GRIA2;GRIA3	GRIA2;GRIA3
GO:1905030	G15	BP	voltage-gated ion channel activity involved in regulation of postsynaptic membrane potential	│ │ └─ voltage-gated ion channel activity involved in regulation of postsynaptic membrane potential	GO:0060078			HGNC:6220	KCNA2	KCNA2
GO:0098962	G4	BP	regulation of postsynaptic neurotransmitter receptor activity	│ ├─ regulation of postsynaptic neurotransmitter receptor activity	SYNGO:postsynprocess			HGNC:17512	HOMER1	HOMER1
GO:0099072	G5	BP	regulation of postsynaptic membrane neurotransmitter receptor levels	│ ├─ regulation of postsynaptic membrane neurotransmitter receptor levels	SYNGO:postsynprocess	0.0534118	0.106824	HGNC:2902;HGNC:13628;HGNC:16923;HGNC:15465;HGNC:201;HGNC:6572;HGNC:2900;HGNC:1407;HGNC:8590;HGNC:8592;HGNC:2309;HGNC:10834;HGNC:10886;HGNC:8996;HGNC:9394	DLG3;CACNG8;AGAP3;GPHN;ADAM22;LGI1;DLG1;CACNG3;PAK1;PAK3;CPLX1;SH3GLB2;SIRT2;PIP5K1C;PICK1	DLG3;CACNG8;AGAP3;GPHN;ADAM22;LGI1;DLG1;CACNG3;PAK1;PAK3;CPLX1;SH3GLB2;SIRT2;PIP5K1C;PICK1
GO:0099645	G16	BP	neurotransmitter receptor localization to postsynaptic specialization membrane	│ │ ├─ neurotransmitter receptor localization to postsynaptic specialization membrane	GO:0099072	0.0622902	0.117252	HGNC:15465;HGNC:201;HGNC:6572;HGNC:2900;HGNC:1407;HGNC:8590;HGNC:8592	GPHN;ADAM22;LGI1;DLG1;CACNG3;PAK1;PAK3	GPHN;ADAM22;LGI1;DLG1;CACNG3;PAK1;PAK3
GO:0098696	G24	BP	regulation of neurotransmitter receptor localization to postsynaptic specialization membrane	│ │ │ └─ regulation of neurotransmitter receptor localization to postsynaptic specialization membrane	GO:0099645			HGNC:8590;HGNC:8592	PAK1;PAK3	PAK1;PAK3
GO:0098967	G17	BP	exocytic insertion of neurotransmitter receptor to postsynaptic membrane	│ │ ├─ exocytic insertion of neurotransmitter receptor to postsynaptic membrane	GO:0099072			HGNC:2309	CPLX1	CPLX1
GO:0099145	G25	BP	regulation of exocytic insertion of neurotransmitter receptor to postsynaptic membrane	│ │ │ └─ regulation of exocytic insertion of neurotransmitter receptor to postsynaptic membrane	GO:0098967			HGNC:2309	CPLX1	CPLX1
GO:0098970	G18	BP	postsynaptic neurotransmitter receptor diffusion trapping	│ │ ├─ postsynaptic neurotransmitter receptor diffusion trapping	GO:0099072
GO:0150054	G26	BP	regulation of postsynaptic neurotransmitter receptor diffusion trapping	│ │ │ └─ regulation of postsynaptic neurotransmitter receptor diffusion trapping	GO:0098970
GO:0098884	G19	BP	postsynaptic neurotransmitter receptor endocytosis	│ │ └─ postsynaptic neurotransmitter receptor endocytosis	GO:0099072	0.301491	0.348841	HGNC:10834;HGNC:10886;HGNC:8996;HGNC:9394	SH3GLB2;SIRT2;PIP5K1C;PICK1	SH3GLB2;SIRT2;PIP5K1C;PICK1
GO:0099149	G27	BP	regulation of postsynaptic neurotransmitter receptor endocytosis	│ │ └─ regulation of postsynaptic neurotransmitter receptor endocytosis	GO:0098884	0.305236	0.348841	HGNC:10886;HGNC:8996;HGNC:9394	SIRT2;PIP5K1C;PICK1	SIRT2;PIP5K1C;PICK1
GO:0150038	G6	BP	postsynaptic dense core vesicle exocytosis	│ ├─ postsynaptic dense core vesicle exocytosis	SYNGO:postsynprocess
GO:0150044	G20	BP	regulation of postsynaptic dense core vesicle exocytosis	│ │ └─ regulation of postsynaptic dense core vesicle exocytosis	GO:0150038
GO:0098926	G7	BP	postsynaptic signaling pathway	│ └─ postsynaptic signaling pathway	SYNGO:postsynprocess			HGNC:1464;HGNC:24600	CAMK4;ANKS1B	CAMK4;ANKS1B
GO:0099527	G21	BP	postsynapse to nucleus signaling pathway	│ └─ postsynapse to nucleus signaling pathway	GO:0098926			HGNC:1464;HGNC:24600	CAMK4;ANKS1B	CAMK4;ANKS1B
GO:1905539	G28	BP	regulation of postsynapse to nucleus signaling pathway	│ └─ regulation of postsynapse to nucleus signaling pathway	GO:0099527
GO:0099536	H1	BP	synaptic signaling	├─ synaptic signaling	SYNGO:synprocess	0.0199527		HGNC:9668;HGNC:15917;HGNC:8590;HGNC:947;HGNC:12684;HGNC:11497;HGNC:14294;HGNC:2905;HGNC:9401;HGNC:18381;HGNC:24600;HGNC:30672;HGNC:9314;HGNC:1464;HGNC:6057;HGNC:7739;HGNC:7737;HGNC:9612	PTPRD;PLCB1;PAK1;BAIAP2;VGF;SYNGAP1;SHANK3;DLGAP1;PRKCE;SYT12;ANKS1B;SYNPO;PPP3CA;CAMK4;INA;NEFL;NEFH;PTK2B	PTPRD;PLCB1;PAK1;BAIAP2;VGF;SYNGAP1;SHANK3;DLGAP1;PRKCE;SYT12;ANKS1B;SYNPO;PPP3CA;CAMK4;INA;NEFL;NEFH;PTK2B
GO:0099537	H2	BP	trans-synaptic signaling	│ ├─ trans-synaptic signaling	GO:0099536	0.0199527	0.0638487	HGNC:9668;HGNC:15917;HGNC:8590;HGNC:947;HGNC:12684;HGNC:11497;HGNC:14294;HGNC:2905;HGNC:9401;HGNC:18381;HGNC:24600;HGNC:30672;HGNC:9314;HGNC:1464;HGNC:6057;HGNC:7739;HGNC:7737;HGNC:9612	PTPRD;PLCB1;PAK1;BAIAP2;VGF;SYNGAP1;SHANK3;DLGAP1;PRKCE;SYT12;ANKS1B;SYNPO;PPP3CA;CAMK4;INA;NEFL;NEFH;PTK2B	PTPRD;PLCB1;PAK1;BAIAP2;VGF;SYNGAP1;SHANK3;DLGAP1;PRKCE;SYT12;ANKS1B;SYNPO;PPP3CA;CAMK4;INA;NEFL;NEFH;PTK2B
GO:0099541	H5	BP	trans-synaptic signaling by lipid	│ │ ├─ trans-synaptic signaling by lipid	GO:0099537			HGNC:15917;HGNC:8590	PLCB1;PAK1	PLCB1;PAK1
GO:0099542	H13	BP	trans-synaptic signaling by endocannabinoid	│ │ │ └─ trans-synaptic signaling by endocannabinoid	GO:0099541			HGNC:15917;HGNC:8590	PLCB1;PAK1	PLCB1;PAK1
GO:0098921	H21	BP	retrograde trans-synaptic signaling by endocannabinoid	│ │ │ ├─ retrograde trans-synaptic signaling by endocannabinoid	GO:0099542			HGNC:15917	PLCB1	PLCB1
GO:0099178	H26	BP	regulation of retrograde trans-synaptic signaling by endocanabinoid	│ │ │ │ └─ regulation of retrograde trans-synaptic signaling by endocanabinoid	GO:0098921			HGNC:15917	PLCB1	PLCB1
GO:0099553	H22	BP	trans-synaptic signaling by endocannabinoid, modulating synaptic transmission	│ │ │ └─ trans-synaptic signaling by endocannabinoid, modulating synaptic transmission	GO:0099542			HGNC:8590	PAK1	PAK1
GO:0150036	H27	BP	regulation of trans-synaptic signaling by endocannabinoid, modulating synaptic transmission	│ │ │ └─ regulation of trans-synaptic signaling by endocannabinoid, modulating synaptic transmission	GO:0099553			HGNC:8590	PAK1	PAK1
GO:0099540	H6	BP	trans-synaptic signaling by neuropeptide	│ │ ├─ trans-synaptic signaling by neuropeptide	GO:0099537
GO:0099543	H7	BP	trans-synaptic signaling by soluble gas	│ │ ├─ trans-synaptic signaling by soluble gas	GO:0099537
GO:0099548	H14	BP	trans-synaptic signaling by nitric oxide	│ │ │ └─ trans-synaptic signaling by nitric oxide	GO:0099543
GO:0099555	H23	BP	trans-synaptic signaling by nitric oxide, modulating synaptic transmission	│ │ │ └─ trans-synaptic signaling by nitric oxide, modulating synaptic transmission	GO:0099548
GO:0098925	H28	BP	retrograde trans-synaptic signaling by nitric oxide, modulating synaptic transmission	│ │ │ └─ retrograde trans-synaptic signaling by nitric oxide, modulating synaptic transmission	GO:0099555
GO:0099545	H8	BP	trans-synaptic signaling by trans-synaptic complex	│ │ ├─ trans-synaptic signaling by trans-synaptic complex	GO:0099537			HGNC:9668	PTPRD	PTPRD
GO:0098942	H15	BP	retrograde trans-synaptic signaling by trans-synaptic protein complex	│ │ │ ├─ retrograde trans-synaptic signaling by trans-synaptic protein complex	GO:0099545
GO:0099557	H16	BP	trans-synaptic signaling by trans-synaptic complex, modulating synaptic transmission	│ │ │ └─ trans-synaptic signaling by trans-synaptic complex, modulating synaptic transmission	GO:0099545
GO:0099157	H9	BP	trans-synaptic signalling via exosome	│ │ ├─ trans-synaptic signalling via exosome	GO:0099537
GO:0099183	H10	BP	trans-synaptic signaling by BDNF, modulating synaptic transmission	│ │ ├─ trans-synaptic signaling by BDNF, modulating synaptic transmission	GO:0099537
GO:0150035	H17	BP	regulation of trans-synaptic signaling by BDNF, modulating synaptic transmission	│ │ │ └─ regulation of trans-synaptic signaling by BDNF, modulating synaptic transmission	GO:0099183
GO:0007268	H11	BP	chemical synaptic transmission	│ │ └─ chemical synaptic transmission	GO:0099537	0.018715	0.0638487	HGNC:947;HGNC:9668;HGNC:12684;HGNC:11497;HGNC:14294;HGNC:2905;HGNC:9401;HGNC:18381;HGNC:24600;HGNC:30672;HGNC:15917;HGNC:9314;HGNC:1464;HGNC:6057;HGNC:7739;HGNC:7737;HGNC:9612	BAIAP2;PTPRD;VGF;SYNGAP1;SHANK3;DLGAP1;PRKCE;SYT12;ANKS1B;SYNPO;PLCB1;PPP3CA;CAMK4;INA;NEFL;NEFH;PTK2B	BAIAP2;PTPRD;VGF;SYNGAP1;SHANK3;DLGAP1;PRKCE;SYT12;ANKS1B;SYNPO;PLCB1;PPP3CA;CAMK4;INA;NEFL;NEFH;PTK2B
GO:0050804	H18	BP	modulation of chemical synaptic transmission	│ │ ├─ modulation of chemical synaptic transmission	GO:0007268	0.55564	0.55564	HGNC:947;HGNC:9668;HGNC:12684;HGNC:11497;HGNC:14294;HGNC:2905	BAIAP2;PTPRD;VGF;SYNGAP1;SHANK3;DLGAP1	BAIAP2;PTPRD;VGF;SYNGAP1;SHANK3;DLGAP1
GO:0099531	H19	BP	presynaptic process involved in chemical synaptic transmission	│ │ ├─ presynaptic process involved in chemical synaptic transmission	GO:0007268			HGNC:9401;HGNC:18381	PRKCE;SYT12	PRKCE;SYT12
GO:0099171	H24	BP	presynaptic modulation of chemical synaptic transmission	│ │ │ └─ presynaptic modulation of chemical synaptic transmission	GO:0099531			HGNC:9401;HGNC:18381	PRKCE;SYT12	PRKCE;SYT12
GO:0099565	H20	BP	postsynaptic process involved in chemical synaptic transmission	│ │ └─ postsynaptic process involved in chemical synaptic transmission	GO:0007268	0.00125337	0.0133692	HGNC:24600;HGNC:30672;HGNC:15917;HGNC:9314;HGNC:1464;HGNC:6057;HGNC:7739;HGNC:7737;HGNC:9612	ANKS1B;SYNPO;PLCB1;PPP3CA;CAMK4;INA;NEFL;NEFH;PTK2B	ANKS1B;SYNPO;PLCB1;PPP3CA;CAMK4;INA;NEFL;NEFH;PTK2B
GO:0099170	H25	BP	postsynaptic modulation of chemical synaptic transmission	│ │ └─ postsynaptic modulation of chemical synaptic transmission	GO:0099565	0.00208929	0.0149747	HGNC:30672;HGNC:15917;HGNC:9314;HGNC:1464;HGNC:6057;HGNC:7739;HGNC:7737;HGNC:9612	SYNPO;PLCB1;PPP3CA;CAMK4;INA;NEFL;NEFH;PTK2B	SYNPO;PLCB1;PPP3CA;CAMK4;INA;NEFL;NEFH;PTK2B
GO:0099538	H3	BP	synaptic signaling via neuropeptide	│ ├─ synaptic signaling via neuropeptide	GO:0099536			HGNC:12684	VGF	VGF
GO:0099163	H4	BP	synaptic signaling by nitric oxide	│ └─ synaptic signaling by nitric oxide	GO:0099536
GO:0150045	H12	BP	regulation of synaptic signaling by nitric oxide	│ └─ regulation of synaptic signaling by nitric oxide	GO:0099163
GO:0050808	I1	BP	synapse organization	├─ synapse organization	SYNGO:synprocess	0.0189559	0.0638487	HGNC:11276;HGNC:24011;HGNC:14295;HGNC:14294;HGNC:2720;HGNC:8592;HGNC:947;HGNC:12732;HGNC:6178;HGNC:613;HGNC:9706;HGNC:17512;HGNC:1461;HGNC:6057;HGNC:7739;HGNC:7737;HGNC:2905;HGNC:7220;HGNC:2900;HGNC:2902;HGNC:32326;HGNC:9668;HGNC:244;HGNC:3313;HGNC:9612;HGNC:7807;HGNC:8590;HGNC:17447;HGNC:9102;HGNC:11497;HGNC:20039	SPTBN2;ABI2;SHANK2;SHANK3;ASAP1;PAK3;BAIAP2;WASF1;ITPKA;APOE;NECTIN1;HOMER1;CAMK2B;INA;NEFL;NEFH;DLGAP1;MPP2;DLG1;DLG3;IGSF9B;PTPRD;ADD2;ELAVL2;PTK2B;NGEF;PAK1;CLSTN1;PLXNA4;SYNGAP1;CAP2	SPTBN2;ABI2;SHANK2;SHANK3;ASAP1;PAK3;BAIAP2;WASF1;ITPKA;APOE;NECTIN1;HOMER1;CAMK2B;INA;NEFL;NEFH;DLGAP1;MPP2;DLG1;DLG3;IGSF9B;PTPRD;ADD2;ELAVL2;PTK2B;NGEF;PAK1;CLSTN1;PLXNA4;SYNGAP1;CAP2
GO:0099172	I2	BP	presynapse organization	│ ├─ presynapse organization	GO:0050808
GO:0099174	I16	BP	regulation of presynapse organization	│ │ └─ regulation of presynapse organization	GO:0099172
GO:0099173	I3	BP	postsynapse organization	│ ├─ postsynapse organization	GO:0050808	0.152577	0.212281	HGNC:11276;HGNC:24011;HGNC:14295;HGNC:14294;HGNC:2720;HGNC:8592;HGNC:947	SPTBN2;ABI2;SHANK2;SHANK3;ASAP1;PAK3;BAIAP2	SPTBN2;ABI2;SHANK2;SHANK3;ASAP1;PAK3;BAIAP2
GO:0099175	I17	BP	regulation of postsynapse organization	│ │ ├─ regulation of postsynapse organization	GO:0099173	0.270288	0.332674	HGNC:14295;HGNC:14294;HGNC:2720;HGNC:8592;HGNC:947	SHANK2;SHANK3;ASAP1;PAK3;BAIAP2	SHANK2;SHANK3;ASAP1;PAK3;BAIAP2
GO:0099084	I18	BP	postsynaptic specialization organization	│ │ └─ postsynaptic specialization organization	GO:0099173
GO:0099563	I4	BP	modification of synaptic structure	│ ├─ modification of synaptic structure	GO:0050808	0.626787		HGNC:12732;HGNC:6178;HGNC:947	WASF1;ITPKA;BAIAP2	WASF1;ITPKA;BAIAP2
GO:0099010	I19	BP	modification of postsynaptic structure	│ │ └─ modification of postsynaptic structure	GO:0099563	0.626787		HGNC:12732;HGNC:6178;HGNC:947	WASF1;ITPKA;BAIAP2	WASF1;ITPKA;BAIAP2
GO:0099159	I34	BP	regulation of modification of postsynaptic structure	│ │ ├─ regulation of modification of postsynaptic structure	GO:0099010
GO:0098885	I35	BP	modification of postsynaptic actin cytoskeleton	│ │ └─ modification of postsynaptic actin cytoskeleton	GO:0099010	0.409913	0.449465	HGNC:12732;HGNC:6178;HGNC:947	WASF1;ITPKA;BAIAP2	WASF1;ITPKA;BAIAP2
GO:1905274	I47	BP	regulation of modification of postsynaptic actin cytoskeleton	│ │ └─ regulation of modification of postsynaptic actin cytoskeleton	GO:0098885			HGNC:947	BAIAP2	BAIAP2
GO:0050807	I5	BP	regulation of synapse organization	│ ├─ regulation of synapse organization	GO:0050808			HGNC:613;HGNC:9706	APOE;NECTIN1	APOE;NECTIN1
GO:0098918	I6	BP	structural constituent of synapse	│ ├─ structural constituent of synapse	GO:0050808	0.00194217		HGNC:11276;HGNC:17512;HGNC:1461;HGNC:6057;HGNC:7739;HGNC:7737;HGNC:14294;HGNC:2905;HGNC:14295;HGNC:7220;HGNC:2900;HGNC:2902	SPTBN2;HOMER1;CAMK2B;INA;NEFL;NEFH;SHANK3;DLGAP1;SHANK2;MPP2;DLG1;DLG3	SPTBN2;HOMER1;CAMK2B;INA;NEFL;NEFH;SHANK3;DLGAP1;SHANK2;MPP2;DLG1;DLG3
GO:0099181	I20	BP	structural constituent of presynapse	│ │ ├─ structural constituent of presynapse	GO:0098918
GO:0098882	I36	BP	structural constituent of active zone	│ │ │ ├─ structural constituent of active zone	GO:0099181
GO:0098699	I37	BP	structural constituent of presynaptic actin cytoskeleton	│ │ │ └─ structural constituent of presynaptic actin cytoskeleton	GO:0099181
GO:0099186	I21	BP	structural constituent of postsynapse	│ │ └─ structural constituent of postsynapse	GO:0098918	0.000375503	0.00684559	HGNC:11276;HGNC:17512;HGNC:1461;HGNC:6057;HGNC:7739;HGNC:7737;HGNC:14294;HGNC:2905;HGNC:14295;HGNC:7220;HGNC:2900;HGNC:2902	SPTBN2;HOMER1;CAMK2B;INA;NEFL;NEFH;SHANK3;DLGAP1;SHANK2;MPP2;DLG1;DLG3	SPTBN2;HOMER1;CAMK2B;INA;NEFL;NEFH;SHANK3;DLGAP1;SHANK2;MPP2;DLG1;DLG3
GO:0098973	I38	BP	structural constituent of postsynaptic actin cytoskeleton	│ │ ├─ structural constituent of postsynaptic actin cytoskeleton	GO:0099186			HGNC:1461	CAMK2B	CAMK2B
GO:0099184	I39	BP	structural constituent of postsynaptic intermediate filament cytoskeleton	│ │ ├─ structural constituent of postsynaptic intermediate filament cytoskeleton	GO:0099186	0.0266548	0.0668936	HGNC:6057;HGNC:7739;HGNC:7737	INA;NEFL;NEFH	INA;NEFL;NEFH
GO:0098879	I40	BP	structural constituent of postsynaptic specialization	│ │ ├─ structural constituent of postsynaptic specialization	GO:0099186
GO:0098919	I41	BP	structural constituent of postsynaptic density	│ │ └─ structural constituent of postsynaptic density	GO:0099186	0.00838913	0.044742	HGNC:14294;HGNC:2905;HGNC:14295;HGNC:7220;HGNC:2900;HGNC:2902	SHANK3;DLGAP1;SHANK2;MPP2;DLG1;DLG3	SHANK3;DLGAP1;SHANK2;MPP2;DLG1;DLG3
GO:0150043	I7	BP	structural constituent of synapse-associated extracellular matrix	│ ├─ structural constituent of synapse-associated extracellular matrix	GO:0050808
GO:0099560	I8	BP	synapse adhesion between pre- and post-synapse	│ ├─ synapse adhesion between pre- and post-synapse	GO:0050808			HGNC:32326;HGNC:9668	IGSF9B;PTPRD	IGSF9B;PTPRD
GO:0099179	I22	BP	regulation of synaptic membrane adhesion	│ │ └─ regulation of synaptic membrane adhesion	GO:0099560
GO:0008039	I9	BP	synaptic target recognition	│ ├─ synaptic target recognition	GO:0050808
GO:0007416	I10	BP	synapse assembly	│ ├─ synapse assembly	GO:0050808	0.421374	0.449465	HGNC:244;HGNC:9668;HGNC:3313;HGNC:11276;HGNC:9612	ADD2;PTPRD;ELAVL2;SPTBN2;PTK2B	ADD2;PTPRD;ELAVL2;SPTBN2;PTK2B
GO:0099054	I23	BP	presynapse assembly	│ │ ├─ presynapse assembly	GO:0007416			HGNC:9668	PTPRD	PTPRD
GO:0051963	I24	BP	regulation of synapse assembly	│ │ ├─ regulation of synapse assembly	GO:0007416			HGNC:3313	ELAVL2	ELAVL2
GO:1905606	I42	BP	regulation of presynapse assembly	│ │ │ ├─ regulation of presynapse assembly	GO:0051963
GO:0150052	I43	BP	regulation of postsynapse assembly	│ │ │ └─ regulation of postsynapse assembly	GO:0051963
GO:0098698	I25	BP	postsynaptic specialization assembly	│ │ ├─ postsynaptic specialization assembly	GO:0007416	0.270297	0.332674	HGNC:11276;HGNC:9668;HGNC:9612	SPTBN2;PTPRD;PTK2B	SPTBN2;PTPRD;PTK2B
GO:0099150	I44	BP	regulation of postsynaptic specialization assembly	│ │ │ ├─ regulation of postsynaptic specialization assembly	GO:0098698			HGNC:11276	SPTBN2	SPTBN2
GO:0097107	I45	BP	postsynaptic density assembly	│ │ │ └─ postsynaptic density assembly	GO:0098698			HGNC:9668;HGNC:9612	PTPRD;PTK2B	PTPRD;PTK2B
GO:0099151	I48	BP	regulation of postsynaptic density assembly	│ │ │ └─ regulation of postsynaptic density assembly	GO:0097107			HGNC:9668;HGNC:9612	PTPRD;PTK2B	PTPRD;PTK2B
GO:0097104	I26	BP	postsynaptic membrane assembly	│ │ └─ postsynaptic membrane assembly	GO:0007416
GO:0098883	I11	BP	synapse disassembly	│ ├─ synapse disassembly	GO:0050808			HGNC:7807	NGEF	NGEF
GO:1905806	I27	BP	regulation of synapse disassembly	│ │ └─ regulation of synapse disassembly	GO:0098883			HGNC:7807	NGEF	NGEF
GO:0060074	I12	BP	synapse maturation	│ ├─ synapse maturation	GO:0050808	0.0572609		HGNC:7739;HGNC:8590;HGNC:8592;HGNC:17447;HGNC:1461	NEFL;PAK1;PAK3;CLSTN1;CAMK2B	NEFL;PAK1;PAK3;CLSTN1;CAMK2B
GO:0090128	I28	BP	regulation of synapse maturation	│ │ └─ regulation of synapse maturation	GO:0060074	0.0357148	0.0810909	HGNC:7739;HGNC:8590;HGNC:8592;HGNC:17447;HGNC:1461	NEFL;PAK1;PAK3;CLSTN1;CAMK2B	NEFL;PAK1;PAK3;CLSTN1;CAMK2B
GO:0099558	I13	BP	maintenance of synapse structure	│ ├─ maintenance of synapse structure	GO:0050808			HGNC:9102;HGNC:11497	PLXNA4;SYNGAP1	PLXNA4;SYNGAP1
GO:0099559	I29	BP	maintenance of alignment of postsynaptic density and presynaptic active zone	│ │ ├─ maintenance of alignment of postsynaptic density and presynaptic active zone	GO:0099558
GO:0098880	I30	BP	maintenance of postsynaptic specialization structure	│ │ └─ maintenance of postsynaptic specialization structure	GO:0099558			HGNC:11497	SYNGAP1	SYNGAP1
GO:0099562	I46	BP	maintenance of postsynaptic density structure	│ │ └─ maintenance of postsynaptic density structure	GO:0098880
GO:0099187	I14	BP	presynaptic cytoskeleton organization	│ ├─ presynaptic cytoskeleton organization	GO:0050808			HGNC:24011;HGNC:20039	ABI2;CAP2	ABI2;CAP2
GO:0099140	I31	BP	presynaptic actin cytoskeleton organization	│ │ └─ presynaptic actin cytoskeleton organization	GO:0099187			HGNC:24011;HGNC:20039	ABI2;CAP2	ABI2;CAP2
GO:0099188	I15	BP	postsynaptic cytoskeleton organization	│ └─ postsynaptic cytoskeleton organization	GO:0050808			HGNC:24011	ABI2	ABI2
GO:0098974	I32	BP	postsynaptic actin cytoskeleton organization	│ ├─ postsynaptic actin cytoskeleton organization	GO:0099188			HGNC:24011	ABI2	ABI2
GO:0099190	I33	BP	postsynaptic spectrin-associated cytoskeleton organization	│ └─ postsynaptic spectrin-associated cytoskeleton organization	GO:0099188
SYNGO:metabolism	J1	BP	metabolism	├─ metabolism	SYNGO:synprocess			HGNC:2553;HGNC:3315	CUL3;ELAVL4	CUL3;ELAVL4
SYNGO:presyn_ATPmetabolic	J2	BP	ATP metabolic process in the presynapse	│ ├─ ATP metabolic process in the presynapse	SYNGO:metabolism
SYNGO:presyn_regulationATPmetabolic	J12	BP	regulation of ATP metabolic process in the presynapse	│ │ └─ regulation of ATP metabolic process in the presynapse	SYNGO:presyn_ATPmetabolic
SYNGO:postsyn_ATPmetabolic	J3	BP	ATP metabolic process in the postsynapse	│ ├─ ATP metabolic process in the postsynapse	SYNGO:metabolism
GO:0099546	J4	BP	protein catabolic process, modulating synaptic transmission	│ ├─ protein catabolic process, modulating synaptic transmission	SYNGO:metabolism
GO:0099574	J5	BP	regulation of protein catabolic process at synapse, modulating synaptic transmission	│ ├─ regulation of protein catabolic process at synapse, modulating synaptic transmission	SYNGO:metabolism
GO:0099576	J13	BP	regulation of protein catabolic process at postsynapse, modulating synaptic transmission	│ │ ├─ regulation of protein catabolic process at postsynapse, modulating synaptic transmission	GO:0099574
GO:0099575	J14	BP	regulation of protein catabolic process at presynapse, modulating synaptic transmission	│ │ └─ regulation of protein catabolic process at presynapse, modulating synaptic transmission	GO:0099574
GO:0099547	J6	BP	regulation of translation at synapse, modulating synaptic transmission	│ ├─ regulation of translation at synapse, modulating synaptic transmission	SYNGO:metabolism
GO:0099578	J15	BP	regulation of translation at postsynapse, modulating synaptic transmission	│ │ ├─ regulation of translation at postsynapse, modulating synaptic transmission	GO:0099547
GO:0099577	J16	BP	regulation of translation at presynapse, modulating synaptic transmission	│ │ └─ regulation of translation at presynapse, modulating synaptic transmission	GO:0099547
GO:0042135	J7	BP	neurotransmitter catabolic process	│ ├─ neurotransmitter catabolic process	SYNGO:metabolism
GO:0140246	J8	BP	protein catabolic process at synapse	│ ├─ protein catabolic process at synapse	SYNGO:metabolism			HGNC:2553	CUL3	CUL3
GO:0140247	J17	BP	protein catabolic process at presynapse	│ │ ├─ protein catabolic process at presynapse	GO:0140246
GO:0140251	J21	BP	regulation protein catabolic process at presynapse	│ │ │ └─ regulation protein catabolic process at presynapse	GO:0140247
GO:0140249	J18	BP	protein catabolic process at postsynapse	│ │ └─ protein catabolic process at postsynapse	GO:0140246			HGNC:2553	CUL3	CUL3
GO:0140252	J22	BP	regulation protein catabolic process at postsynapse	│ │ └─ regulation protein catabolic process at postsynapse	GO:0140249			HGNC:2553	CUL3	CUL3
GO:0042136	J9	BP	neurotransmitter biosynthetic process	│ ├─ neurotransmitter biosynthetic process	SYNGO:metabolism
GO:0140241	J10	BP	translation at synapse	│ ├─ translation at synapse	SYNGO:metabolism			HGNC:3315	ELAVL4	ELAVL4
GO:0140236	J19	BP	translation at presynapse	│ │ ├─ translation at presynapse	GO:0140241
GO:0140242	J20	BP	translation at postsynapse	│ │ └─ translation at postsynapse	GO:0140241			HGNC:3315	ELAVL4	ELAVL4
GO:0140245	J23	BP	regulation of translation at postsynapse	│ │ └─ regulation of translation at postsynapse	GO:0140242			HGNC:3315	ELAVL4	ELAVL4
GO:0140235	J11	BP	RNA polyadenylation at postsynapse	│ └─ RNA polyadenylation at postsynapse	SYNGO:metabolism
SYNGO:transport	K1	BP	transport	└─ transport	SYNGO:synprocess	0.477094	0.492485	HGNC:12732;HGNC:18706;HGNC:17447	WASF1;GRIPAP1;CLSTN1	WASF1;GRIPAP1;CLSTN1
GO:0008088	K2	BP	axo-dendritic transport	├─ axo-dendritic transport	SYNGO:transport			HGNC:12732	WASF1	WASF1
GO:0098930	K7	BP	axonal transport	│ ├─ axonal transport	GO:0008088
GO:0008089	K13	BP	anterograde axonal transport	│ │ ├─ anterograde axonal transport	GO:0098930
GO:0099641	K21	BP	anterograde axonal protein transport	│ │ │ ├─ anterograde axonal protein transport	GO:0008089
GO:0140231	K22	BP	anterograde axonal transport of neurotransmitter receptor complex	│ │ │ └─ anterograde axonal transport of neurotransmitter receptor complex	GO:0008089
GO:0099088	K14	BP	axonal transport of messenger ribonucleoprotein complex	│ │ └─ axonal transport of messenger ribonucleoprotein complex	GO:0098930
GO:0098935	K8	BP	dendritic transport	│ └─ dendritic transport	GO:0008088			HGNC:12732	WASF1	WASF1
GO:0098937	K15	BP	anterograde dendritic transport	│ ├─ anterograde dendritic transport	GO:0098935
GO:0098971	K23	BP	anterograde dendritic transport of neurotransmitter receptor complex	│ │ └─ anterograde dendritic transport of neurotransmitter receptor complex	GO:0098937
GO:0098939	K16	BP	dendritic transport of mitochondrion	│ ├─ dendritic transport of mitochondrion	GO:0098935			HGNC:12732	WASF1	WASF1
GO:0098961	K17	BP	dendritic transport of ribonucleoprotein complex	│ └─ dendritic transport of ribonucleoprotein complex	GO:0098935
GO:0098963	K24	BP	dendritic transport of messenger ribonucleoprotein complex	│ └─ dendritic transport of messenger ribonucleoprotein complex	GO:0098961
GO:0098964	K27	BP	anterograde dendritic transport of messenger ribonucleoprotein complex	│ └─ anterograde dendritic transport of messenger ribonucleoprotein complex	GO:0098963
GO:0099514	K3	BP	synaptic vesicle cytoskeletal transport	├─ synaptic vesicle cytoskeletal transport	SYNGO:transport
GO:0099517	K9	BP	synaptic vesicle transport along microtubule	│ └─ synaptic vesicle transport along microtubule	GO:0099514
GO:0048490	K18	BP	anterograde synaptic vesicle transport	│ └─ anterograde synaptic vesicle transport	GO:0099517
GO:1903742	K25	BP	regulation of anterograde synaptic vesicle transport	│ └─ regulation of anterograde synaptic vesicle transport	GO:0048490
GO:0099090	K4	BP	synaptic vesicle recycling via endosome	├─ synaptic vesicle recycling via endosome	SYNGO:transport			HGNC:18706	GRIPAP1	GRIPAP1
GO:0099158	K10	BP	regulation of recycling endosome localization within postsynapse	│ └─ regulation of recycling endosome localization within postsynapse	GO:0099090			HGNC:18706	GRIPAP1	GRIPAP1
GO:0099089	K5	BP	establishment of endoplasmic reticulum localization to postsynapse	├─ establishment of endoplasmic reticulum localization to postsynapse	SYNGO:transport
GO:0099637	K6	BP	neurotransmitter receptor transport	└─ neurotransmitter receptor transport	SYNGO:transport			HGNC:17447;HGNC:18706	CLSTN1;GRIPAP1	CLSTN1;GRIPAP1
GO:0098877	K11	BP	neurotransmitter receptor transport to plasma membrane	├─ neurotransmitter receptor transport to plasma membrane	GO:0099637			HGNC:17447;HGNC:18706	CLSTN1;GRIPAP1	CLSTN1;GRIPAP1
GO:0098969	K19	BP	neurotransmitter receptor transport to postsynaptic membrane	│ ├─ neurotransmitter receptor transport to postsynaptic membrane	GO:0098877			HGNC:17447	CLSTN1	CLSTN1
GO:0099639	K20	BP	neurotransmitter receptor transport, endosome to plasma membrane	│ └─ neurotransmitter receptor transport, endosome to plasma membrane	GO:0098877			HGNC:18706	GRIPAP1	GRIPAP1
GO:0098887	K26	BP	neurotransmitter receptor transport, endosome to postsynaptic membrane	│ └─ neurotransmitter receptor transport, endosome to postsynaptic membrane	GO:0099639			HGNC:18706	GRIPAP1	GRIPAP1
GO:0099152	K28	BP	regulation of neurotransmitter receptor transport, endosome to postsynaptic membrane	│ └─ regulation of neurotransmitter receptor transport, endosome to postsynaptic membrane	GO:0098887			HGNC:18706	GRIPAP1	GRIPAP1
GO:0098943	K12	BP	neurotransmitter receptor transport, postsynaptic endosome to lysosome	└─ neurotransmitter receptor transport, postsynaptic endosome to lysosome	GO:0099637

## Sheet: FTD-MAPT higher expr prot
GO term ID	user interface reference code	GO domain	GO term name	GO term name - hierarchical structure	GO parent term ID	GSEA p-value	GSEA 'gene cluster' FDR corrected p-value	genes - hgnc_id	genes - hgnc_symbol	genes - your genelist input
GO:0045202		CC	synapse	synapse		0.971262	0.999616	HGNC:329;HGNC:10371;HGNC:10402;HGNC:10325;HGNC:10922;HGNC:3711;HGNC:2464;HGNC:1435;HGNC:678;HGNC:11026;HGNC:380;HGNC:10333;HGNC:10345;HGNC:5031;HGNC:10011;HGNC:533;HGNC:6153;HGNC:1497;HGNC:1426;HGNC:11446;HGNC:245;HGNC:9393;HGNC:1434;HGNC:12303;HGNC:2510;HGNC:2514;HGNC:7605;HGNC:16507;HGNC:11042;HGNC:1759;HGNC:6487;HGNC:6492;HGNC:11131;HGNC:3754;HGNC:24941;HGNC:8032;HGNC:1441;HGNC:2157;HGNC:18415…	AGRN;RPLP0;RPS19;RPL24;SLC16A1;FKBP1A;VCAN;CALB2;ARHGDIA;SLC3A2;AKR1A1;RPL30;RPL35A;HNRNPA1;RHEB;ANXA1;ITGB1;CASK;CADPS;STXBP3;ADD3;PRKCA;CALB1;TRIO;CTNNA2;CTNNB1;MYO6;SYNPR;SLC6A1;CDH2;LAMB2;LAMC1;SNAP23;FLNA;HNRNPA3;NTRK2;CALD1;CNN3;HIP1R;HNRNPA2B1;MAPK1;RBMX;EIF3E;GRID1;FARP1;FBXO2;TNC	AGRN;RPLP0;RPS19;RPL24;SLC16A1;FKBP1A;VCAN;CALB2;ARHGDIA;SLC3A2;AKR1A1;RPL30;RPL35A;HNRNPA1;RHEB;ANXA1;ITGB1;CASK;CAPS;STXBP3;ADD3;PRKCA;CALB1;TRIO;CTNNA2;CTNNB1;MYO6;SYNPR;SLC6A1;CDH2;LAMB2;LAMC1;SNAP23;FLNA;HNRNPA3;NTRK2;CALD1;CNN3;HIP1R;HNRNPA2B1;MAPK1;RBMX;EIF3E;GLUD1;FARP1;FBXO2;TNC
GO:0097060	A1	CC	synaptic membrane	├─ synaptic membrane	GO:0045202			HGNC:533;HGNC:6153	ANXA1;ITGB1	ANXA1;ITGB1
GO:0099243	A2	CC	extrinsic component of synaptic membrane	│ ├─ extrinsic component of synaptic membrane	GO:0097060
GO:0099699	A3	CC	integral component of synaptic membrane	│ └─ integral component of synaptic membrane	GO:0097060			HGNC:6153	ITGB1	ITGB1
GO:0098793	B1	CC	presynapse	├─ presynapse	GO:0045202	0.999616	0.999616	HGNC:1497;HGNC:1426;HGNC:11446;HGNC:245;HGNC:9393;HGNC:1434;HGNC:12303;HGNC:2510;HGNC:2514;HGNC:7605;HGNC:16507;HGNC:11042;HGNC:1759;HGNC:10325;HGNC:10345;HGNC:10371	CASK;CADPS;STXBP3;ADD3;PRKCA;CALB1;TRIO;CTNNA2;CTNNB1;MYO6;SYNPR;SLC6A1;CDH2;RPL24;RPL35A;RPLP0	CASK;CAPS;STXBP3;ADD3;PRKCA;CALB1;TRIO;CTNNA2;CTNNB1;MYO6;SYNPR;SLC6A1;CDH2;RPL24;RPL35A;RPLP0
GO:0099523	B2	CC	presynaptic cytosol	│ ├─ presynaptic cytosol	GO:0098793			HGNC:9393;HGNC:1434	PRKCA;CALB1	PRKCA;CALB1
GO:0099569	B3	CC	presynaptic cytoskeleton	│ ├─ presynaptic cytoskeleton	GO:0098793
GO:0099182	B12	CC	presynaptic intermediate filament cytoskeleton	│ │ ├─ presynaptic intermediate filament cytoskeleton	GO:0099569
GO:0099143	B13	CC	presynaptic actin cytoskeleton	│ │ └─ presynaptic actin cytoskeleton	GO:0099569
GO:0048786	B4	CC	presynaptic active zone	│ ├─ presynaptic active zone	GO:0098793	0.877887	0.999616	HGNC:12303;HGNC:2510;HGNC:2514	TRIO;CTNNA2;CTNNB1	TRIO;CTNNA2;CTNNB1
GO:0098831	B14	CC	presynaptic active zone cytoplasmic component	│ │ ├─ presynaptic active zone cytoplasmic component	GO:0048786			HGNC:2510;HGNC:2514	CTNNA2;CTNNB1	CTNNA2;CTNNB1
GO:0048787	B15	CC	presynaptic active zone membrane	│ │ └─ presynaptic active zone membrane	GO:0048786
GO:0099029	B27	CC	anchored component of presynaptic active zone membrane	│ │ ├─ anchored component of presynaptic active zone membrane	GO:0048787
GO:0098891	B28	CC	extrinsic component of presynaptic active zone membrane	│ │ ├─ extrinsic component of presynaptic active zone membrane	GO:0048787
GO:0099059	B29	CC	integral component of presynaptic active zone membrane	│ │ └─ integral component of presynaptic active zone membrane	GO:0048787
GO:0098833	B5	CC	presynaptic endocytic zone	│ ├─ presynaptic endocytic zone	GO:0098793			HGNC:7605	MYO6	MYO6
GO:0098835	B16	CC	presynaptic endocytic zone membrane	│ │ └─ presynaptic endocytic zone membrane	GO:0098833
GO:0098894	B30	CC	extrinsic component of presynaptic endocytic zone membrane	│ │ └─ extrinsic component of presynaptic endocytic zone membrane	GO:0098835
GO:0098830	B6	CC	presynaptic endosome	│ ├─ presynaptic endosome	GO:0098793
GO:0098954	B17	CC	presynaptic endosome membrane	│ │ └─ presynaptic endosome membrane	GO:0098830
GO:0099067	B31	CC	integral component of presynaptic endosome membrane	│ │ └─ integral component of presynaptic endosome membrane	GO:0098954
GO:0008021	B7	CC	synaptic vesicle	│ ├─ synaptic vesicle	GO:0098793			HGNC:16507	SYNPR	SYNPR
GO:0034592	B18	CC	synaptic vesicle lumen	│ │ ├─ synaptic vesicle lumen	GO:0008021
GO:0030672	B19	CC	synaptic vesicle membrane	│ │ └─ synaptic vesicle membrane	GO:0008021			HGNC:16507	SYNPR	SYNPR
GO:0098993	B32	CC	anchored component of synaptic vesicle membrane	│ │ ├─ anchored component of synaptic vesicle membrane	GO:0030672
GO:0098850	B33	CC	extrinsic component of synaptic vesicle membrane	│ │ ├─ extrinsic component of synaptic vesicle membrane	GO:0030672
GO:0030285	B34	CC	integral component of synaptic vesicle membrane	│ │ └─ integral component of synaptic vesicle membrane	GO:0030672			HGNC:16507	SYNPR	SYNPR
GO:0098992	B8	CC	neuronal dense core vesicle	│ ├─ neuronal dense core vesicle	GO:0098793			HGNC:1426	CADPS	CAPS
GO:0099013	B20	CC	neuronal dense core vesicle lumen	│ │ ├─ neuronal dense core vesicle lumen	GO:0098992
GO:0099012	B21	CC	neuronal dense core vesicle membrane	│ │ └─ neuronal dense core vesicle membrane	GO:0098992			HGNC:1426	CADPS	CAPS
GO:0098674	B35	CC	extrinsic component of neuronal dense core vesicle membrane	│ │ ├─ extrinsic component of neuronal dense core vesicle membrane	GO:0099012			HGNC:1426	CADPS	CAPS
GO:0099066	B36	CC	integral component of neuronal dense core vesicle membrane	│ │ └─ integral component of neuronal dense core vesicle membrane	GO:0099012
GO:0042734	B9	CC	presynaptic membrane	│ ├─ presynaptic membrane	GO:0098793	0.760864	0.999616	HGNC:2514;HGNC:2510;HGNC:11042;HGNC:1759	CTNNB1;CTNNA2;SLC6A1;CDH2	CTNNB1;CTNNA2;SLC6A1;CDH2
GO:0099026	B22	CC	anchored component of presynaptic membrane	│ │ ├─ anchored component of presynaptic membrane	GO:0042734
GO:0098888	B23	CC	extrinsic component of presynaptic membrane	│ │ ├─ extrinsic component of presynaptic membrane	GO:0042734			HGNC:2510	CTNNA2	CTNNA2
GO:0099056	B24	CC	integral component of presynaptic membrane	│ │ └─ integral component of presynaptic membrane	GO:0042734			HGNC:11042;HGNC:1759	SLC6A1;CDH2	SLC6A1;CDH2
SYNGO:presyn_ribosome	B10	CC	presynaptic ribosome	│ ├─ presynaptic ribosome	GO:0098793	0.760762	0.999616	HGNC:10325;HGNC:10345;HGNC:10371	RPL24;RPL35A;RPLP0	RPL24;RPL35A;RPLP0
SYNGO:presyn_er	B11	CC	presynaptic ER	│ └─ presynaptic ER	GO:0098793
SYNGO:presyn_er_membrane	B25	CC	presynaptic ER membrane	│ ├─ presynaptic ER membrane	SYNGO:presyn_er
SYNGO:presyn_er_membrane_integral	B37	CC	integral component of presynaptic ER membrane	│ │ └─ integral component of presynaptic ER membrane	SYNGO:presyn_er_membrane
SYNGO:presyn_ser	B26	CC	presynaptic SER	│ └─ presynaptic SER	SYNGO:presyn_er
SYNGO:presyn_ser_membrane	B38	CC	presynaptic SER membrane	│ └─ presynaptic SER membrane	SYNGO:presyn_ser
SYNGO:presyn_ser_membrane_integral	B39	CC	integral component of presynaptic SER membrane	│ └─ integral component of presynaptic SER membrane	SYNGO:presyn_ser_membrane
GO:0043083	C1	CC	synaptic cleft	├─ synaptic cleft	GO:0045202	0.105629	0.422514	HGNC:6487;HGNC:6492;HGNC:329	LAMB2;LAMC1;AGRN	LAMB2;LAMC1;AGRN
GO:0098965	C2	CC	extracellular matrix of synaptic cleft	│ └─ extracellular matrix of synaptic cleft	GO:0043083			HGNC:329	AGRN	AGRN
GO:0098794	D1	CC	postsynapse	├─ postsynapse	GO:0045202	0.654229	0.999616	HGNC:11131;HGNC:3754;HGNC:10371;HGNC:24941;HGNC:1434;HGNC:8032;HGNC:245;HGNC:12303;HGNC:1441;HGNC:2157;HGNC:18415;HGNC:5033;HGNC:7605;HGNC:6871;HGNC:10333;HGNC:10402;HGNC:10011;HGNC:9910;HGNC:3277;HGNC:2510;HGNC:2514;HGNC:4575;HGNC:3591;HGNC:13581;HGNC:11042;HGNC:1759;HGNC:6153;HGNC:10325;HGNC:10345	SNAP23;FLNA;RPLP0;HNRNPA3;CALB1;NTRK2;ADD3;TRIO;CALD1;CNN3;HIP1R;HNRNPA2B1;MYO6;MAPK1;RPL30;RPS19;RHEB;RBMX;EIF3E;CTNNA2;CTNNB1;GRID1;FARP1;FBXO2;SLC6A1;CDH2;ITGB1;RPL24;RPL35A	SNAP23;FLNA;RPLP0;HNRNPA3;CALB1;NTRK2;ADD3;TRIO;CALD1;CNN3;HIP1R;HNRNPA2B1;MYO6;MAPK1;RPL30;RPS19;RHEB;RBMX;EIF3E;CTNNA2;CTNNB1;GLUD1;FARP1;FBXO2;SLC6A1;CDH2;ITGB1;RPL24;RPL35A
GO:0099524	D2	CC	postsynaptic cytosol	│ ├─ postsynaptic cytosol	GO:0098794			HGNC:1434;HGNC:5033	CALB1;HNRNPA2B1	CALB1;HNRNPA2B1
GO:0099571	D3	CC	postsynaptic cytoskeleton	│ ├─ postsynaptic cytoskeleton	GO:0098794			HGNC:7605	MYO6	MYO6
GO:0099160	D12	CC	postsynaptic intermediate filament cytoskeleton	│ │ ├─ postsynaptic intermediate filament cytoskeleton	GO:0099571
GO:0098871	D13	CC	postsynaptic actin cytoskeleton	│ │ ├─ postsynaptic actin cytoskeleton	GO:0099571			HGNC:7605	MYO6	MYO6
GO:0150050	D14	CC	postsynaptic septin cytoskeleton	│ │ ├─ postsynaptic septin cytoskeleton	GO:0099571
GO:0099189	D15	CC	postsynaptic spectrin-associated cytoskeleton	│ │ └─ postsynaptic spectrin-associated cytoskeleton	GO:0099571
GO:0097444	D4	CC	spine apparatus	│ ├─ spine apparatus	GO:0098794
GO:0098897	D16	CC	spine apparatus membrane	│ │ └─ spine apparatus membrane	GO:0097444
GO:0099065	D30	CC	integral component of spine apparatus membrane	│ │ └─ integral component of spine apparatus membrane	GO:0098897
GO:0150051	D5	CC	postsynaptic Golgi apparatus	│ ├─ postsynaptic Golgi apparatus	GO:0098794
GO:0099572	D6	CC	postsynaptic specialization	│ ├─ postsynaptic specialization	GO:0098794	0.559129		HGNC:7605;HGNC:6871;HGNC:10333;HGNC:10371;HGNC:10402;HGNC:24941;HGNC:10011;HGNC:9910;HGNC:5033;HGNC:3277;HGNC:2510;HGNC:2514;HGNC:4575	MYO6;MAPK1;RPL30;RPLP0;RPS19;HNRNPA3;RHEB;RBMX;HNRNPA2B1;EIF3E;CTNNA2;CTNNB1;GRID1	MYO6;MAPK1;RPL30;RPLP0;RPS19;HNRNPA3;RHEB;RBMX;HNRNPA2B1;EIF3E;CTNNA2;CTNNB1;GLUD1
GO:0099091	D17	CC	postsynaptic specialization, intracellular component	│ │ ├─ postsynaptic specialization, intracellular component	GO:0099572
GO:0099634	D18	CC	postsynaptic specialization membrane	│ │ ├─ postsynaptic specialization membrane	GO:0099572
GO:0098892	D31	CC	extrinsic component of postsynaptic specialization membrane	│ │ │ ├─ extrinsic component of postsynaptic specialization membrane	GO:0099634
GO:0099060	D32	CC	integral component of postsynaptic specialization membrane	│ │ │ └─ integral component of postsynaptic specialization membrane	GO:0099634
GO:0014069	D19	CC	postsynaptic density	│ │ ├─ postsynaptic density	GO:0099572	0.441308	0.999616	HGNC:7605;HGNC:6871;HGNC:10333;HGNC:10371;HGNC:10402;HGNC:24941;HGNC:10011;HGNC:9910;HGNC:5033;HGNC:3277;HGNC:2510;HGNC:2514;HGNC:4575	MYO6;MAPK1;RPL30;RPLP0;RPS19;HNRNPA3;RHEB;RBMX;HNRNPA2B1;EIF3E;CTNNA2;CTNNB1;GRID1	MYO6;MAPK1;RPL30;RPLP0;RPS19;HNRNPA3;RHEB;RBMX;HNRNPA2B1;EIF3E;CTNNA2;CTNNB1;GLUD1
GO:0099092	D33	CC	postsynaptic density, intracellular component	│ │ │ ├─ postsynaptic density, intracellular component	GO:0014069			HGNC:2510;HGNC:2514	CTNNA2;CTNNB1	CTNNA2;CTNNB1
GO:0098839	D34	CC	postsynaptic density membrane	│ │ │ └─ postsynaptic density membrane	GO:0014069			HGNC:4575	GRID1	GLUD1
GO:0099031	D40	CC	anchored component of postsynaptic density membrane	│ │ │ ├─ anchored component of postsynaptic density membrane	GO:0098839
GO:0099147	D41	CC	extrinsic component of postsynaptic density membrane	│ │ │ ├─ extrinsic component of postsynaptic density membrane	GO:0098839
GO:0099061	D42	CC	integral component of postsynaptic density membrane	│ │ │ └─ integral component of postsynaptic density membrane	GO:0098839			HGNC:4575	GRID1	GLUD1
GO:0099629	D20	CC	postsynaptic specialization of symmetric synapse	│ │ └─ postsynaptic specialization of symmetric synapse	GO:0099572
GO:0098843	D7	CC	postsynaptic endocytic zone	│ ├─ postsynaptic endocytic zone	GO:0098794
GO:0098844	D21	CC	postsynaptic endocytic zone membrane	│ │ └─ postsynaptic endocytic zone membrane	GO:0098843
GO:0098845	D8	CC	postsynaptic endosome	│ ├─ postsynaptic endosome	GO:0098794
GO:0098895	D22	CC	postsynaptic endosome membrane	│ │ ├─ postsynaptic endosome membrane	GO:0098845
GO:0098999	D35	CC	extrinsic component of postsynaptic endosome membrane	│ │ │ └─ extrinsic component of postsynaptic endosome membrane	GO:0098895
GO:0098842	D23	CC	postsynaptic early endosome	│ │ ├─ postsynaptic early endosome	GO:0098845
GO:0098896	D36	CC	postsynaptic early endosome membrane	│ │ │ └─ postsynaptic early endosome membrane	GO:0098842
GO:0098998	D43	CC	extrinsic component of postsynaptic early endosome membrane	│ │ │ └─ extrinsic component of postsynaptic early endosome membrane	GO:0098896
GO:0098837	D24	CC	postsynaptic recycling endosome	│ │ └─ postsynaptic recycling endosome	GO:0098845
GO:0098944	D37	CC	postsynaptic recycling endosome membrane	│ │ └─ postsynaptic recycling endosome membrane	GO:0098837
GO:0099033	D44	CC	anchored component of postsynaptic recycling endosome membrane	│ │ └─ anchored component of postsynaptic recycling endosome membrane	GO:0098944
GO:0045211	D9	CC	postsynaptic membrane	│ ├─ postsynaptic membrane	GO:0098794	0.0517672	0.310603	HGNC:2514;HGNC:8032;HGNC:3591;HGNC:2510;HGNC:13581;HGNC:11042;HGNC:1759;HGNC:6153;HGNC:4575	CTNNB1;NTRK2;FARP1;CTNNA2;FBXO2;SLC6A1;CDH2;ITGB1;GRID1	CTNNB1;NTRK2;FARP1;CTNNA2;FBXO2;SLC6A1;CDH2;ITGB1;GLUD1
GO:0099025	D25	CC	anchored component of postsynaptic membrane	│ │ ├─ anchored component of postsynaptic membrane	GO:0045211
GO:0098890	D26	CC	extrinsic component of postsynaptic membrane	│ │ ├─ extrinsic component of postsynaptic membrane	GO:0045211	0.045586	0.310603	HGNC:3591;HGNC:2510;HGNC:13581	FARP1;CTNNA2;FBXO2	FARP1;CTNNA2;FBXO2
GO:0099055	D27	CC	integral component of postsynaptic membrane	│ │ └─ integral component of postsynaptic membrane	GO:0045211	0.328858	0.986575	HGNC:11042;HGNC:1759;HGNC:6153;HGNC:4575	SLC6A1;CDH2;ITGB1;GRID1	SLC6A1;CDH2;ITGB1;GLUD1
SYNGO:postsyn_ribosome	D10	CC	postsynaptic ribosome	│ ├─ postsynaptic ribosome	GO:0098794	0.655269	0.999616	HGNC:10325;HGNC:10333;HGNC:10345;HGNC:10371;HGNC:10402	RPL24;RPL30;RPL35A;RPLP0;RPS19	RPL24;RPL30;RPL35A;RPLP0;RPS19
SYNGO:postsyn_er	D11	CC	postsynaptic ER	│ └─ postsynaptic ER	GO:0098794
SYNGO:postsyn_er_membrane	D28	CC	postsynaptic ER membrane	│ ├─ postsynaptic ER membrane	SYNGO:postsyn_er
SYNGO:postsyn_er_membrane_integral	D38	CC	integral component of postsynaptic ER membrane	│ │ └─ integral component of postsynaptic ER membrane	SYNGO:postsyn_er_membrane
SYNGO:postsyn_ser	D29	CC	postsynaptic SER	│ └─ postsynaptic SER	SYNGO:postsyn_er
SYNGO:postsyn_ser_membrane	D39	CC	postsynaptic SER membrane	│ └─ postsynaptic SER membrane	SYNGO:postsyn_ser
SYNGO:postsyn_ser_membrane_integral	D45	CC	integral component of postsynaptic SER membrane	│ └─ integral component of postsynaptic SER membrane	SYNGO:postsyn_ser_membrane
GO:0099544	E1	CC	extrasynaptic space	└─ extrasynaptic space	GO:0045202			HGNC:5318	TNC	TNC
GO:0098966	E2	CC	perisynaptic extracellular matrix	└─ perisynaptic extracellular matrix	GO:0099544			HGNC:5318	TNC	TNC
SYNGO:synprocess		BP	process in the synapse	process in the synapse		0.934952	0.997036	HGNC:1434;HGNC:1435;HGNC:678;HGNC:2514;HGNC:9393;HGNC:1497;HGNC:1426;HGNC:11042;HGNC:11131;HGNC:6153;HGNC:9944;HGNC:7605;HGNC:3591;HGNC:8032;HGNC:1759;HGNC:377;HGNC:14540;HGNC:12303;HGNC:16507;HGNC:3754;HGNC:18415;HGNC:10011;HGNC:4575;HGNC:655;HGNC:9910;HGNC:2510;HGNC:329;HGNC:6487;HGNC:12691;HGNC:13581;HGNC:18683;HGNC:10325;HGNC:10345;HGNC:10371;HGNC:5048	CALB1;CALB2;ARHGDIA;CTNNB1;PRKCA;CASK;CADPS;SLC6A1;SNAP23;ITGB1;RDX;MYO6;FARP1;NTRK2;CDH2;AKAP7;WNK1;TRIO;SYNPR;FLNA;HIP1R;RHEB;GRID1;ARF4;RBMX;CTNNA2;AGRN;LAMB2;EZR;FBXO2;EIF4A3;RPL24;RPL35A;RPLP0;HNRNPU	CALB1;CALB2;ARHGDIA;CTNNB1;PRKCA;CASK;CAPS;SLC6A1;SNAP23;ITGB1;RDX;MYO6;FARP1;NTRK2;CDH2;AKAP7;WNK1;TRIO;SYNPR;FLNA;HIP1R;RHEB;GLUD1;ARF4;RBMX;CTNNA2;AGRN;LAMB2;EZR;FBXO2;EIF4A3;RPL24;RPL35A;RPLP0;HNRNPU
SYNGO:presynprocess	F1	BP	process in the presynapse	├─ process in the presynapse	SYNGO:synprocess	0.991517	0.997036	HGNC:1434;HGNC:1435;HGNC:678;HGNC:2514;HGNC:9393;HGNC:1497;HGNC:1426;HGNC:11042	CALB1;CALB2;ARHGDIA;CTNNB1;PRKCA;CASK;CADPS;SLC6A1	CALB1;CALB2;ARHGDIA;CTNNB1;PRKCA;CASK;CAPS;SLC6A1
GO:0099509	F2	BP	regulation of presynaptic cytosolic calcium levels	│ ├─ regulation of presynaptic cytosolic calcium levels	SYNGO:presynprocess			HGNC:1434;HGNC:1435	CALB1;CALB2	CALB1;CALB2
GO:1905056	F11	BP	ATPase-coupled calcium ion transmembrane transporter activity involved in regulation of presynaptic cytosolic calcium levels	│ │ ├─ ATPase-coupled calcium ion transmembrane transporter activity involved in regulation of presynaptic cytosolic calcium levels	GO:0099509
GO:0099534	F12	BP	calcium ion binding involved in regulation of presynaptic cytosolic calcium levels	│ │ ├─ calcium ion binding involved in regulation of presynaptic cytosolic calcium levels	GO:0099509			HGNC:1434;HGNC:1435	CALB1;CALB2	CALB1;CALB2
GO:0099626	F13	BP	voltage-gated calcium channel activity involved in regulation of presynaptic cytosolic calcium levels	│ │ └─ voltage-gated calcium channel activity involved in regulation of presynaptic cytosolic calcium levels	GO:0099509
GO:0099505	F3	BP	regulation of presynaptic membrane potential	│ ├─ regulation of presynaptic membrane potential	SYNGO:presynprocess
GO:0099507	F14	BP	ligand-gated ion channel activity involved in regulation of presynaptic membrane potential	│ │ ├─ ligand-gated ion channel activity involved in regulation of presynaptic membrane potential	GO:0099505
GO:0099508	F15	BP	voltage-gated ion channel activity involved in regulation of presynaptic membrane potential	│ │ ├─ voltage-gated ion channel activity involved in regulation of presynaptic membrane potential	GO:0099505
GO:0150047	F16	BP	G protein-coupled neurotransmitter receptor activity involved in regulation of presynaptic membrane potential	│ │ ├─ G protein-coupled neurotransmitter receptor activity involved in regulation of presynaptic membrane potential	GO:0099505
GO:0140232	F17	BP	intracellular cAMP-activated cation channel activity involved in regulation of presynaptic membrane potential	│ │ └─ intracellular cAMP-activated cation channel activity involved in regulation of presynaptic membrane potential	GO:0099505
GO:0140238	F4	BP	presynaptic endocytosis	│ ├─ presynaptic endocytosis	SYNGO:presynprocess
GO:0099504	F5	BP	synaptic vesicle cycle	│ ├─ synaptic vesicle cycle	SYNGO:presynprocess	0.997036	0.997036	HGNC:678;HGNC:2514;HGNC:9393;HGNC:1497;HGNC:1426	ARHGDIA;CTNNB1;PRKCA;CASK;CADPS	ARHGDIA;CTNNB1;PRKCA;CASK;CAPS
GO:0098693	F18	BP	regulation of synaptic vesicle cycle	│ │ ├─ regulation of synaptic vesicle cycle	GO:0099504			HGNC:678	ARHGDIA	ARHGDIA
GO:0097091	F19	BP	synaptic vesicle clustering	│ │ ├─ synaptic vesicle clustering	GO:0099504			HGNC:2514	CTNNB1	CTNNB1
GO:0099532	F20	BP	synaptic vesicle endosomal processing	│ │ ├─ synaptic vesicle endosomal processing	GO:0099504
GO:0016182	F29	BP	synaptic vesicle budding from endosome	│ │ │ ├─ synaptic vesicle budding from endosome	GO:0099532
GO:0016189	F30	BP	synaptic vesicle to endosome fusion	│ │ │ └─ synaptic vesicle to endosome fusion	GO:0099532
GO:0016079	F21	BP	synaptic vesicle exocytosis	│ │ ├─ synaptic vesicle exocytosis	GO:0099504	0.833979	0.997036	HGNC:9393;HGNC:1497;HGNC:1426	PRKCA;CASK;CADPS	PRKCA;CASK;CAPS
GO:0099502	F31	BP	calcium-dependent activation of synaptic vesicle fusion	│ │ │ ├─ calcium-dependent activation of synaptic vesicle fusion	GO:0016079
GO:0150037	F41	BP	regulation of calcium-dependent activation of synaptic vesicle fusion	│ │ │ │ └─ regulation of calcium-dependent activation of synaptic vesicle fusion	GO:0099502
GO:2000300	F32	BP	regulation of synaptic vesicle exocytosis	│ │ │ ├─ regulation of synaptic vesicle exocytosis	GO:0016079			HGNC:9393;HGNC:1497	PRKCA;CASK	PRKCA;CASK
GO:0016081	F33	BP	synaptic vesicle docking	│ │ │ ├─ synaptic vesicle docking	GO:0016079
GO:0099148	F42	BP	regulation of synaptic vesicle docking	│ │ │ │ └─ regulation of synaptic vesicle docking	GO:0016081
GO:0031629	F34	BP	synaptic vesicle fusion to presynaptic active zone membrane	│ │ │ ├─ synaptic vesicle fusion to presynaptic active zone membrane	GO:0016079
GO:0031630	F43	BP	regulation of synaptic vesicle fusion to presynaptic active zone membrane	│ │ │ │ └─ regulation of synaptic vesicle fusion to presynaptic active zone membrane	GO:0031629
GO:0016082	F35	BP	synaptic vesicle priming	│ │ │ └─ synaptic vesicle priming	GO:0016079			HGNC:1426	CADPS	CAPS
GO:0010807	F44	BP	regulation of synaptic vesicle priming	│ │ │ └─ regulation of synaptic vesicle priming	GO:0016082
GO:0098700	F22	BP	synaptic vesicle neurotransmitter loading	│ │ ├─ synaptic vesicle neurotransmitter loading	GO:0099504
GO:0099162	F36	BP	regulation of synaptic vesicle neurotransmitter loading	│ │ │ └─ regulation of synaptic vesicle neurotransmitter loading	GO:0098700
GO:0099180	F23	BP	zinc ion import into synaptic vesicle	│ │ ├─ zinc ion import into synaptic vesicle	GO:0099504
GO:0097401	F24	BP	synaptic vesicle proton loading	│ │ ├─ synaptic vesicle proton loading	GO:0099504
GO:1901546	F37	BP	regulation of proton loading	│ │ │ └─ regulation of proton loading	GO:0097401
GO:0048488	F25	BP	synaptic vesicle endocytosis	│ │ └─ synaptic vesicle endocytosis	GO:0099504
GO:1900242	F38	BP	regulation of synaptic vesicle endocytosis	│ │ ├─ regulation of synaptic vesicle endocytosis	GO:0048488
GO:0016185	F39	BP	synaptic vesicle budding from presynaptic endocytic zone membrane	│ │ ├─ synaptic vesicle budding from presynaptic endocytic zone membrane	GO:0048488
GO:0098694	F45	BP	regulation of synaptic vesicle budding from presynaptic endocytic zone membrane	│ │ │ └─ regulation of synaptic vesicle budding from presynaptic endocytic zone membrane	GO:0016185
GO:0016191	F40	BP	synaptic vesicle uncoating	│ │ └─ synaptic vesicle uncoating	GO:0048488
GO:0099525	F6	BP	presynaptic dense core vesicle exocytosis	│ ├─ presynaptic dense core vesicle exocytosis	SYNGO:presynprocess			HGNC:1426	CADPS	CAPS
GO:0099161	F26	BP	regulation of presynaptic dense core vesicle exocytosis	│ │ └─ regulation of presynaptic dense core vesicle exocytosis	GO:0099525
GO:0001504	F7	BP	neurotransmitter uptake	│ ├─ neurotransmitter uptake	SYNGO:presynprocess
GO:0098810	F8	BP	neurotransmitter reuptake	│ ├─ neurotransmitter reuptake	SYNGO:presynprocess			HGNC:11042	SLC6A1	SLC6A1
GO:0051580	F27	BP	regulation of neurotransmitter uptake	│ │ └─ regulation of neurotransmitter uptake	GO:0098810
SYNGO:presyn_chaperoneProteinFolding	F9	BP	presynaptic chaperone-mediated protein folding	│ ├─ presynaptic chaperone-mediated protein folding	SYNGO:presynprocess
GO:0098928	F10	BP	presynaptic signaling pathway	│ └─ presynaptic signaling pathway	SYNGO:presynprocess
GO:0099526	F28	BP	presynapse to nucleus signaling pathway	│ └─ presynapse to nucleus signaling pathway	GO:0098928
SYNGO:postsynprocess	G1	BP	process in the postsynapse	├─ process in the postsynapse	SYNGO:synprocess	0.943431	0.997036	HGNC:1434;HGNC:11131;HGNC:6153;HGNC:9944;HGNC:7605	CALB1;SNAP23;ITGB1;RDX;MYO6	CALB1;SNAP23;ITGB1;RDX;MYO6
GO:0099566	G2	BP	regulation of postsynaptic cytosolic calcium levels	│ ├─ regulation of postsynaptic cytosolic calcium levels	SYNGO:postsynprocess			HGNC:1434	CALB1	CALB1
GO:1905059	G8	BP	ATPase-coupled calcium ion transmembrane transporter activity involved in regulation of postsynaptic cytosolic calcium levels	│ │ ├─ ATPase-coupled calcium ion transmembrane transporter activity involved in regulation of postsynaptic cytosolic calcium levels	GO:0099566
GO:0099567	G9	BP	calcium ion binding involved in regulation of postsynaptic cytosolic calcium levels	│ │ ├─ calcium ion binding involved in regulation of postsynaptic cytosolic calcium levels	GO:0099566			HGNC:1434	CALB1	CALB1
GO:1905060	G10	BP	calcium:cation antiporter activity involved in regulation of postsynaptic cytosolic calcium ion levels	│ │ ├─ calcium:cation antiporter activity involved in regulation of postsynaptic cytosolic calcium ion levels	GO:0099566
GO:0098695	G11	BP	inositol 1,4,5-trisphosphate receptor activity involved in regulation of postsynaptic cytosolic calcium levels	│ │ ├─ inositol 1,4,5-trisphosphate receptor activity involved in regulation of postsynaptic cytosolic calcium levels	GO:0099566
GO:0099583	G12	BP	neurotransmitter receptor activity involved in regulation of postsynaptic cytosolic calcium levels	│ │ └─ neurotransmitter receptor activity involved in regulation of postsynaptic cytosolic calcium levels	GO:0099566
GO:0098872	G22	BP	G-protein coupled neurotransmitter receptor activity involved in regulation of postsynaptic cytosolic calcium levels	│ │ └─ G-protein coupled neurotransmitter receptor activity involved in regulation of postsynaptic cytosolic calcium levels	GO:0099583
GO:0060078	G3	BP	regulation of postsynaptic membrane potential	│ ├─ regulation of postsynaptic membrane potential	SYNGO:postsynprocess
GO:0140233	G13	BP	intracellular cAMP-activated cation channel activity involved in regulation of postsynaptic membrane potential	│ │ ├─ intracellular cAMP-activated cation channel activity involved in regulation of postsynaptic membrane potential	GO:0060078
GO:0099579	G23	BP	G protein-coupled neurotransmitter receptor activity involved in regulation of postsynaptic membrane potential	│ │ │ └─ G protein-coupled neurotransmitter receptor activity involved in regulation of postsynaptic membrane potential	GO:0140233
GO:1904315	G14	BP	transmitter-gated ion channel activity involved in regulation of postsynaptic membrane potential	│ │ ├─ transmitter-gated ion channel activity involved in regulation of postsynaptic membrane potential	GO:0060078
GO:1905030	G15	BP	voltage-gated ion channel activity involved in regulation of postsynaptic membrane potential	│ │ └─ voltage-gated ion channel activity involved in regulation of postsynaptic membrane potential	GO:0060078
GO:0098962	G4	BP	regulation of postsynaptic neurotransmitter receptor activity	│ ├─ regulation of postsynaptic neurotransmitter receptor activity	SYNGO:postsynprocess
GO:0099072	G5	BP	regulation of postsynaptic membrane neurotransmitter receptor levels	│ ├─ regulation of postsynaptic membrane neurotransmitter receptor levels	SYNGO:postsynprocess	0.868407	0.997036	HGNC:11131;HGNC:6153;HGNC:9944;HGNC:7605	SNAP23;ITGB1;RDX;MYO6	SNAP23;ITGB1;RDX;MYO6
GO:0099645	G16	BP	neurotransmitter receptor localization to postsynaptic specialization membrane	│ │ ├─ neurotransmitter receptor localization to postsynaptic specialization membrane	GO:0099072
GO:0098696	G24	BP	regulation of neurotransmitter receptor localization to postsynaptic specialization membrane	│ │ │ └─ regulation of neurotransmitter receptor localization to postsynaptic specialization membrane	GO:0099645
GO:0098967	G17	BP	exocytic insertion of neurotransmitter receptor to postsynaptic membrane	│ │ ├─ exocytic insertion of neurotransmitter receptor to postsynaptic membrane	GO:0099072			HGNC:11131	SNAP23	SNAP23
GO:0099145	G25	BP	regulation of exocytic insertion of neurotransmitter receptor to postsynaptic membrane	│ │ │ └─ regulation of exocytic insertion of neurotransmitter receptor to postsynaptic membrane	GO:0098967
GO:0098970	G18	BP	postsynaptic neurotransmitter receptor diffusion trapping	│ │ ├─ postsynaptic neurotransmitter receptor diffusion trapping	GO:0099072			HGNC:6153;HGNC:9944	ITGB1;RDX	ITGB1;RDX
GO:0150054	G26	BP	regulation of postsynaptic neurotransmitter receptor diffusion trapping	│ │ │ └─ regulation of postsynaptic neurotransmitter receptor diffusion trapping	GO:0098970			HGNC:6153;HGNC:9944	ITGB1;RDX	ITGB1;RDX
GO:0098884	G19	BP	postsynaptic neurotransmitter receptor endocytosis	│ │ └─ postsynaptic neurotransmitter receptor endocytosis	GO:0099072			HGNC:7605	MYO6	MYO6
GO:0099149	G27	BP	regulation of postsynaptic neurotransmitter receptor endocytosis	│ │ └─ regulation of postsynaptic neurotransmitter receptor endocytosis	GO:0098884
GO:0150038	G6	BP	postsynaptic dense core vesicle exocytosis	│ ├─ postsynaptic dense core vesicle exocytosis	SYNGO:postsynprocess
GO:0150044	G20	BP	regulation of postsynaptic dense core vesicle exocytosis	│ │ └─ regulation of postsynaptic dense core vesicle exocytosis	GO:0150038
GO:0098926	G7	BP	postsynaptic signaling pathway	│ └─ postsynaptic signaling pathway	SYNGO:postsynprocess
GO:0099527	G21	BP	postsynapse to nucleus signaling pathway	│ └─ postsynapse to nucleus signaling pathway	GO:0098926
GO:1905539	G28	BP	regulation of postsynapse to nucleus signaling pathway	│ └─ regulation of postsynapse to nucleus signaling pathway	GO:0099527
GO:0099536	H1	BP	synaptic signaling	├─ synaptic signaling	SYNGO:synprocess	0.399819		HGNC:3591;HGNC:8032;HGNC:1759;HGNC:377;HGNC:6153;HGNC:14540;HGNC:12303;HGNC:16507;HGNC:7605	FARP1;NTRK2;CDH2;AKAP7;ITGB1;WNK1;TRIO;SYNPR;MYO6	FARP1;NTRK2;CDH2;AKAP7;ITGB1;WNK1;TRIO;SYNPR;MYO6
GO:0099537	H2	BP	trans-synaptic signaling	│ ├─ trans-synaptic signaling	GO:0099536	0.399819	0.997036	HGNC:3591;HGNC:8032;HGNC:1759;HGNC:377;HGNC:6153;HGNC:14540;HGNC:12303;HGNC:16507;HGNC:7605	FARP1;NTRK2;CDH2;AKAP7;ITGB1;WNK1;TRIO;SYNPR;MYO6	FARP1;NTRK2;CDH2;AKAP7;ITGB1;WNK1;TRIO;SYNPR;MYO6
GO:0099541	H5	BP	trans-synaptic signaling by lipid	│ │ ├─ trans-synaptic signaling by lipid	GO:0099537
GO:0099542	H13	BP	trans-synaptic signaling by endocannabinoid	│ │ │ └─ trans-synaptic signaling by endocannabinoid	GO:0099541
GO:0098921	H21	BP	retrograde trans-synaptic signaling by endocannabinoid	│ │ │ ├─ retrograde trans-synaptic signaling by endocannabinoid	GO:0099542
GO:0099178	H26	BP	regulation of retrograde trans-synaptic signaling by endocanabinoid	│ │ │ │ └─ regulation of retrograde trans-synaptic signaling by endocanabinoid	GO:0098921
GO:0099553	H22	BP	trans-synaptic signaling by endocannabinoid, modulating synaptic transmission	│ │ │ └─ trans-synaptic signaling by endocannabinoid, modulating synaptic transmission	GO:0099542
GO:0150036	H27	BP	regulation of trans-synaptic signaling by endocannabinoid, modulating synaptic transmission	│ │ │ └─ regulation of trans-synaptic signaling by endocannabinoid, modulating synaptic transmission	GO:0099553
GO:0099540	H6	BP	trans-synaptic signaling by neuropeptide	│ │ ├─ trans-synaptic signaling by neuropeptide	GO:0099537
GO:0099543	H7	BP	trans-synaptic signaling by soluble gas	│ │ ├─ trans-synaptic signaling by soluble gas	GO:0099537
GO:0099548	H14	BP	trans-synaptic signaling by nitric oxide	│ │ │ └─ trans-synaptic signaling by nitric oxide	GO:0099543
GO:0099555	H23	BP	trans-synaptic signaling by nitric oxide, modulating synaptic transmission	│ │ │ └─ trans-synaptic signaling by nitric oxide, modulating synaptic transmission	GO:0099548
GO:0098925	H28	BP	retrograde trans-synaptic signaling by nitric oxide, modulating synaptic transmission	│ │ │ └─ retrograde trans-synaptic signaling by nitric oxide, modulating synaptic transmission	GO:0099555
GO:0099545	H8	BP	trans-synaptic signaling by trans-synaptic complex	│ │ ├─ trans-synaptic signaling by trans-synaptic complex	GO:0099537			HGNC:3591	FARP1	FARP1
GO:0098942	H15	BP	retrograde trans-synaptic signaling by trans-synaptic protein complex	│ │ │ ├─ retrograde trans-synaptic signaling by trans-synaptic protein complex	GO:0099545			HGNC:3591	FARP1	FARP1
GO:0099557	H16	BP	trans-synaptic signaling by trans-synaptic complex, modulating synaptic transmission	│ │ │ └─ trans-synaptic signaling by trans-synaptic complex, modulating synaptic transmission	GO:0099545
GO:0099157	H9	BP	trans-synaptic signalling via exosome	│ │ ├─ trans-synaptic signalling via exosome	GO:0099537
GO:0099183	H10	BP	trans-synaptic signaling by BDNF, modulating synaptic transmission	│ │ ├─ trans-synaptic signaling by BDNF, modulating synaptic transmission	GO:0099537			HGNC:8032	NTRK2	NTRK2
GO:0150035	H17	BP	regulation of trans-synaptic signaling by BDNF, modulating synaptic transmission	│ │ │ └─ regulation of trans-synaptic signaling by BDNF, modulating synaptic transmission	GO:0099183
GO:0007268	H11	BP	chemical synaptic transmission	│ │ └─ chemical synaptic transmission	GO:0099537	0.575438	0.997036	HGNC:1759;HGNC:377;HGNC:6153;HGNC:14540;HGNC:12303;HGNC:16507;HGNC:7605	CDH2;AKAP7;ITGB1;WNK1;TRIO;SYNPR;MYO6	CDH2;AKAP7;ITGB1;WNK1;TRIO;SYNPR;MYO6
GO:0050804	H18	BP	modulation of chemical synaptic transmission	│ │ ├─ modulation of chemical synaptic transmission	GO:0007268	0.352845	0.997036	HGNC:1759;HGNC:377;HGNC:6153;HGNC:14540;HGNC:12303;HGNC:16507	CDH2;AKAP7;ITGB1;WNK1;TRIO;SYNPR	CDH2;AKAP7;ITGB1;WNK1;TRIO;SYNPR
GO:0099531	H19	BP	presynaptic process involved in chemical synaptic transmission	│ │ ├─ presynaptic process involved in chemical synaptic transmission	GO:0007268			HGNC:7605	MYO6	MYO6
GO:0099171	H24	BP	presynaptic modulation of chemical synaptic transmission	│ │ │ └─ presynaptic modulation of chemical synaptic transmission	GO:0099531			HGNC:7605	MYO6	MYO6
GO:0099565	H20	BP	postsynaptic process involved in chemical synaptic transmission	│ │ └─ postsynaptic process involved in chemical synaptic transmission	GO:0007268			HGNC:12303	TRIO	TRIO
GO:0099170	H25	BP	postsynaptic modulation of chemical synaptic transmission	│ │ └─ postsynaptic modulation of chemical synaptic transmission	GO:0099565			HGNC:12303	TRIO	TRIO
GO:0099538	H3	BP	synaptic signaling via neuropeptide	│ ├─ synaptic signaling via neuropeptide	GO:0099536
GO:0099163	H4	BP	synaptic signaling by nitric oxide	│ └─ synaptic signaling by nitric oxide	GO:0099536
GO:0150045	H12	BP	regulation of synaptic signaling by nitric oxide	│ └─ regulation of synaptic signaling by nitric oxide	GO:0099163
GO:0050808	I1	BP	synapse organization	├─ synapse organization	SYNGO:synprocess	0.776184	0.997036	HGNC:3754;HGNC:18415;HGNC:10011;HGNC:4575;HGNC:655;HGNC:9910;HGNC:2510;HGNC:329;HGNC:6487;HGNC:2514;HGNC:3591;HGNC:6153;HGNC:12691	FLNA;HIP1R;RHEB;GRID1;ARF4;RBMX;CTNNA2;AGRN;LAMB2;CTNNB1;FARP1;ITGB1;EZR	FLNA;HIP1R;RHEB;GLUD1;ARF4;RBMX;CTNNA2;AGRN;LAMB2;CTNNB1;FARP1;ITGB1;EZR
GO:0099172	I2	BP	presynapse organization	│ ├─ presynapse organization	GO:0050808
GO:0099174	I16	BP	regulation of presynapse organization	│ │ └─ regulation of presynapse organization	GO:0099172
GO:0099173	I3	BP	postsynapse organization	│ ├─ postsynapse organization	GO:0050808	0.234698	0.997036	HGNC:18415;HGNC:10011;HGNC:4575;HGNC:655;HGNC:9910	HIP1R;RHEB;GRID1;ARF4;RBMX	HIP1R;RHEB;GLUD1;ARF4;RBMX
GO:0099175	I17	BP	regulation of postsynapse organization	│ │ ├─ regulation of postsynapse organization	GO:0099173	0.253191	0.997036	HGNC:10011;HGNC:4575;HGNC:655;HGNC:9910	RHEB;GRID1;ARF4;RBMX	RHEB;GLUD1;ARF4;RBMX
GO:0099084	I18	BP	postsynaptic specialization organization	│ │ └─ postsynaptic specialization organization	GO:0099173
GO:0099563	I4	BP	modification of synaptic structure	│ ├─ modification of synaptic structure	GO:0050808			HGNC:2510	CTNNA2	CTNNA2
GO:0099010	I19	BP	modification of postsynaptic structure	│ │ └─ modification of postsynaptic structure	GO:0099563			HGNC:2510	CTNNA2	CTNNA2
GO:0099159	I34	BP	regulation of modification of postsynaptic structure	│ │ ├─ regulation of modification of postsynaptic structure	GO:0099010
GO:0098885	I35	BP	modification of postsynaptic actin cytoskeleton	│ │ └─ modification of postsynaptic actin cytoskeleton	GO:0099010			HGNC:2510	CTNNA2	CTNNA2
GO:1905274	I47	BP	regulation of modification of postsynaptic actin cytoskeleton	│ │ └─ regulation of modification of postsynaptic actin cytoskeleton	GO:0098885
GO:0050807	I5	BP	regulation of synapse organization	│ ├─ regulation of synapse organization	GO:0050808			HGNC:329;HGNC:655	AGRN;ARF4	AGRN;ARF4
GO:0098918	I6	BP	structural constituent of synapse	│ ├─ structural constituent of synapse	GO:0050808
GO:0099181	I20	BP	structural constituent of presynapse	│ │ ├─ structural constituent of presynapse	GO:0098918
GO:0098882	I36	BP	structural constituent of active zone	│ │ │ ├─ structural constituent of active zone	GO:0099181
GO:0098699	I37	BP	structural constituent of presynaptic actin cytoskeleton	│ │ │ └─ structural constituent of presynaptic actin cytoskeleton	GO:0099181
GO:0099186	I21	BP	structural constituent of postsynapse	│ │ └─ structural constituent of postsynapse	GO:0098918
GO:0098973	I38	BP	structural constituent of postsynaptic actin cytoskeleton	│ │ ├─ structural constituent of postsynaptic actin cytoskeleton	GO:0099186
GO:0099184	I39	BP	structural constituent of postsynaptic intermediate filament cytoskeleton	│ │ ├─ structural constituent of postsynaptic intermediate filament cytoskeleton	GO:0099186
GO:0098879	I40	BP	structural constituent of postsynaptic specialization	│ │ ├─ structural constituent of postsynaptic specialization	GO:0099186
GO:0098919	I41	BP	structural constituent of postsynaptic density	│ │ └─ structural constituent of postsynaptic density	GO:0099186
GO:0150043	I7	BP	structural constituent of synapse-associated extracellular matrix	│ ├─ structural constituent of synapse-associated extracellular matrix	GO:0050808			HGNC:6487	LAMB2	LAMB2
GO:0099560	I8	BP	synapse adhesion between pre- and post-synapse	│ ├─ synapse adhesion between pre- and post-synapse	GO:0050808
GO:0099179	I22	BP	regulation of synaptic membrane adhesion	│ │ └─ regulation of synaptic membrane adhesion	GO:0099560
GO:0008039	I9	BP	synaptic target recognition	│ ├─ synaptic target recognition	GO:0050808
GO:0007416	I10	BP	synapse assembly	│ ├─ synapse assembly	GO:0050808			HGNC:2514;HGNC:3591	CTNNB1;FARP1	CTNNB1;FARP1
GO:0099054	I23	BP	presynapse assembly	│ │ ├─ presynapse assembly	GO:0007416
GO:0051963	I24	BP	regulation of synapse assembly	│ │ ├─ regulation of synapse assembly	GO:0007416			HGNC:2514;HGNC:3591	CTNNB1;FARP1	CTNNB1;FARP1
GO:1905606	I42	BP	regulation of presynapse assembly	│ │ │ ├─ regulation of presynapse assembly	GO:0051963			HGNC:3591	FARP1	FARP1
GO:0150052	I43	BP	regulation of postsynapse assembly	│ │ │ └─ regulation of postsynapse assembly	GO:0051963
GO:0098698	I25	BP	postsynaptic specialization assembly	│ │ ├─ postsynaptic specialization assembly	GO:0007416
GO:0099150	I44	BP	regulation of postsynaptic specialization assembly	│ │ │ ├─ regulation of postsynaptic specialization assembly	GO:0098698
GO:0097107	I45	BP	postsynaptic density assembly	│ │ │ └─ postsynaptic density assembly	GO:0098698
GO:0099151	I48	BP	regulation of postsynaptic density assembly	│ │ │ └─ regulation of postsynaptic density assembly	GO:0097107
GO:0097104	I26	BP	postsynaptic membrane assembly	│ │ └─ postsynaptic membrane assembly	GO:0007416
GO:0098883	I11	BP	synapse disassembly	│ ├─ synapse disassembly	GO:0050808			HGNC:6153	ITGB1	ITGB1
GO:1905806	I27	BP	regulation of synapse disassembly	│ │ └─ regulation of synapse disassembly	GO:0098883			HGNC:6153	ITGB1	ITGB1
GO:0060074	I12	BP	synapse maturation	│ ├─ synapse maturation	GO:0050808
GO:0090128	I28	BP	regulation of synapse maturation	│ │ └─ regulation of synapse maturation	GO:0060074
GO:0099558	I13	BP	maintenance of synapse structure	│ ├─ maintenance of synapse structure	GO:0050808			HGNC:6153	ITGB1	ITGB1
GO:0099559	I29	BP	maintenance of alignment of postsynaptic density and presynaptic active zone	│ │ ├─ maintenance of alignment of postsynaptic density and presynaptic active zone	GO:0099558
GO:0098880	I30	BP	maintenance of postsynaptic specialization structure	│ │ └─ maintenance of postsynaptic specialization structure	GO:0099558			HGNC:6153	ITGB1	ITGB1
GO:0099562	I46	BP	maintenance of postsynaptic density structure	│ │ └─ maintenance of postsynaptic density structure	GO:0098880
GO:0099187	I14	BP	presynaptic cytoskeleton organization	│ ├─ presynaptic cytoskeleton organization	GO:0050808
GO:0099140	I31	BP	presynaptic actin cytoskeleton organization	│ │ └─ presynaptic actin cytoskeleton organization	GO:0099187
GO:0099188	I15	BP	postsynaptic cytoskeleton organization	│ └─ postsynaptic cytoskeleton organization	GO:0050808			HGNC:3591;HGNC:12691	FARP1;EZR	FARP1;EZR
GO:0098974	I32	BP	postsynaptic actin cytoskeleton organization	│ ├─ postsynaptic actin cytoskeleton organization	GO:0099188			HGNC:3591;HGNC:12691	FARP1;EZR	FARP1;EZR
GO:0099190	I33	BP	postsynaptic spectrin-associated cytoskeleton organization	│ └─ postsynaptic spectrin-associated cytoskeleton organization	GO:0099188
SYNGO:metabolism	J1	BP	metabolism	├─ metabolism	SYNGO:synprocess	0.600065	0.997036	HGNC:13581;HGNC:18683;HGNC:10325;HGNC:10345;HGNC:10371	FBXO2;EIF4A3;RPL24;RPL35A;RPLP0	FBXO2;EIF4A3;RPL24;RPL35A;RPLP0
SYNGO:presyn_ATPmetabolic	J2	BP	ATP metabolic process in the presynapse	│ ├─ ATP metabolic process in the presynapse	SYNGO:metabolism
SYNGO:presyn_regulationATPmetabolic	J12	BP	regulation of ATP metabolic process in the presynapse	│ │ └─ regulation of ATP metabolic process in the presynapse	SYNGO:presyn_ATPmetabolic
SYNGO:postsyn_ATPmetabolic	J3	BP	ATP metabolic process in the postsynapse	│ ├─ ATP metabolic process in the postsynapse	SYNGO:metabolism
GO:0099546	J4	BP	protein catabolic process, modulating synaptic transmission	│ ├─ protein catabolic process, modulating synaptic transmission	SYNGO:metabolism
GO:0099574	J5	BP	regulation of protein catabolic process at synapse, modulating synaptic transmission	│ ├─ regulation of protein catabolic process at synapse, modulating synaptic transmission	SYNGO:metabolism			HGNC:13581	FBXO2	FBXO2
GO:0099576	J13	BP	regulation of protein catabolic process at postsynapse, modulating synaptic transmission	│ │ ├─ regulation of protein catabolic process at postsynapse, modulating synaptic transmission	GO:0099574			HGNC:13581	FBXO2	FBXO2
GO:0099575	J14	BP	regulation of protein catabolic process at presynapse, modulating synaptic transmission	│ │ └─ regulation of protein catabolic process at presynapse, modulating synaptic transmission	GO:0099574
GO:0099547	J6	BP	regulation of translation at synapse, modulating synaptic transmission	│ ├─ regulation of translation at synapse, modulating synaptic transmission	SYNGO:metabolism			HGNC:18683	EIF4A3	EIF4A3
GO:0099578	J15	BP	regulation of translation at postsynapse, modulating synaptic transmission	│ │ ├─ regulation of translation at postsynapse, modulating synaptic transmission	GO:0099547			HGNC:18683	EIF4A3	EIF4A3
GO:0099577	J16	BP	regulation of translation at presynapse, modulating synaptic transmission	│ │ └─ regulation of translation at presynapse, modulating synaptic transmission	GO:0099547
GO:0042135	J7	BP	neurotransmitter catabolic process	│ ├─ neurotransmitter catabolic process	SYNGO:metabolism
GO:0140246	J8	BP	protein catabolic process at synapse	│ ├─ protein catabolic process at synapse	SYNGO:metabolism
GO:0140247	J17	BP	protein catabolic process at presynapse	│ │ ├─ protein catabolic process at presynapse	GO:0140246
GO:0140251	J21	BP	regulation protein catabolic process at presynapse	│ │ │ └─ regulation protein catabolic process at presynapse	GO:0140247
GO:0140249	J18	BP	protein catabolic process at postsynapse	│ │ └─ protein catabolic process at postsynapse	GO:0140246
GO:0140252	J22	BP	regulation protein catabolic process at postsynapse	│ │ └─ regulation protein catabolic process at postsynapse	GO:0140249
GO:0042136	J9	BP	neurotransmitter biosynthetic process	│ ├─ neurotransmitter biosynthetic process	SYNGO:metabolism
GO:0140241	J10	BP	translation at synapse	│ ├─ translation at synapse	SYNGO:metabolism	0.777215		HGNC:10325;HGNC:10345;HGNC:10371	RPL24;RPL35A;RPLP0	RPL24;RPL35A;RPLP0
GO:0140236	J19	BP	translation at presynapse	│ │ ├─ translation at presynapse	GO:0140241	0.743344	0.997036	HGNC:10325;HGNC:10345;HGNC:10371	RPL24;RPL35A;RPLP0	RPL24;RPL35A;RPLP0
GO:0140242	J20	BP	translation at postsynapse	│ │ └─ translation at postsynapse	GO:0140241	0.777215	0.997036	HGNC:10325;HGNC:10345;HGNC:10371	RPL24;RPL35A;RPLP0	RPL24;RPL35A;RPLP0
GO:0140245	J23	BP	regulation of translation at postsynapse	│ │ └─ regulation of translation at postsynapse	GO:0140242
GO:0140235	J11	BP	RNA polyadenylation at postsynapse	│ └─ RNA polyadenylation at postsynapse	SYNGO:metabolism
SYNGO:transport	K1	BP	transport	└─ transport	SYNGO:synprocess			HGNC:5048	HNRNPU	HNRNPU
GO:0008088	K2	BP	axo-dendritic transport	├─ axo-dendritic transport	SYNGO:transport			HGNC:5048	HNRNPU	HNRNPU
GO:0098930	K7	BP	axonal transport	│ ├─ axonal transport	GO:0008088
GO:0008089	K13	BP	anterograde axonal transport	│ │ ├─ anterograde axonal transport	GO:0098930
GO:0099641	K21	BP	anterograde axonal protein transport	│ │ │ ├─ anterograde axonal protein transport	GO:0008089
GO:0140231	K22	BP	anterograde axonal transport of neurotransmitter receptor complex	│ │ │ └─ anterograde axonal transport of neurotransmitter receptor complex	GO:0008089
GO:0099088	K14	BP	axonal transport of messenger ribonucleoprotein complex	│ │ └─ axonal transport of messenger ribonucleoprotein complex	GO:0098930
GO:0098935	K8	BP	dendritic transport	│ └─ dendritic transport	GO:0008088			HGNC:5048	HNRNPU	HNRNPU
GO:0098937	K15	BP	anterograde dendritic transport	│ ├─ anterograde dendritic transport	GO:0098935
GO:0098971	K23	BP	anterograde dendritic transport of neurotransmitter receptor complex	│ │ └─ anterograde dendritic transport of neurotransmitter receptor complex	GO:0098937
GO:0098939	K16	BP	dendritic transport of mitochondrion	│ ├─ dendritic transport of mitochondrion	GO:0098935
GO:0098961	K17	BP	dendritic transport of ribonucleoprotein complex	│ └─ dendritic transport of ribonucleoprotein complex	GO:0098935			HGNC:5048	HNRNPU	HNRNPU
GO:0098963	K24	BP	dendritic transport of messenger ribonucleoprotein complex	│ └─ dendritic transport of messenger ribonucleoprotein complex	GO:0098961			HGNC:5048	HNRNPU	HNRNPU
GO:0098964	K27	BP	anterograde dendritic transport of messenger ribonucleoprotein complex	│ └─ anterograde dendritic transport of messenger ribonucleoprotein complex	GO:0098963
GO:0099514	K3	BP	synaptic vesicle cytoskeletal transport	├─ synaptic vesicle cytoskeletal transport	SYNGO:transport
GO:0099517	K9	BP	synaptic vesicle transport along microtubule	│ └─ synaptic vesicle transport along microtubule	GO:0099514
GO:0048490	K18	BP	anterograde synaptic vesicle transport	│ └─ anterograde synaptic vesicle transport	GO:0099517
GO:1903742	K25	BP	regulation of anterograde synaptic vesicle transport	│ └─ regulation of anterograde synaptic vesicle transport	GO:0048490
GO:0099090	K4	BP	synaptic vesicle recycling via endosome	├─ synaptic vesicle recycling via endosome	SYNGO:transport
GO:0099158	K10	BP	regulation of recycling endosome localization within postsynapse	│ └─ regulation of recycling endosome localization within postsynapse	GO:0099090
GO:0099089	K5	BP	establishment of endoplasmic reticulum localization to postsynapse	├─ establishment of endoplasmic reticulum localization to postsynapse	SYNGO:transport
GO:0099637	K6	BP	neurotransmitter receptor transport	└─ neurotransmitter receptor transport	SYNGO:transport
GO:0098877	K11	BP	neurotransmitter receptor transport to plasma membrane	├─ neurotransmitter receptor transport to plasma membrane	GO:0099637
GO:0098969	K19	BP	neurotransmitter receptor transport to postsynaptic membrane	│ ├─ neurotransmitter receptor transport to postsynaptic membrane	GO:0098877
GO:0099639	K20	BP	neurotransmitter receptor transport, endosome to plasma membrane	│ └─ neurotransmitter receptor transport, endosome to plasma membrane	GO:0098877
GO:0098887	K26	BP	neurotransmitter receptor transport, endosome to postsynaptic membrane	│ └─ neurotransmitter receptor transport, endosome to postsynaptic membrane	GO:0099639
GO:0099152	K28	BP	regulation of neurotransmitter receptor transport, endosome to postsynaptic membrane	│ └─ regulation of neurotransmitter receptor transport, endosome to postsynaptic membrane	GO:0098887
GO:0098943	K12	BP	neurotransmitter receptor transport, postsynaptic endosome to lysosome	└─ neurotransmitter receptor transport, postsynaptic endosome to lysosome	GO:0099637

## Sheet: FTD-MAPT lower expr prot
GO term ID	user interface reference code	GO domain	GO term name	GO term name - hierarchical structure	GO parent term ID	GSEA p-value	GSEA 'gene cluster' FDR corrected p-value	genes - hgnc_id	genes - hgnc_symbol	genes - your genelist input
GO:0045202		CC	synapse	synapse		0.0212915	0.0612132	HGNC:1052;HGNC:12005;HGNC:9314;HGNC:10469;HGNC:12684;HGNC:10830;HGNC:6766;HGNC:17062;HGNC:563;HGNC:565;HGNC:9861;HGNC:17187;HGNC:29478;HGNC:2309;HGNC:11503;HGNC:471;HGNC:29125;HGNC:244;HGNC:25412;HGNC:2696;HGNC:9612;HGNC:9401;HGNC:3953;HGNC:11140;HGNC:7734;HGNC:7739;HGNC:8011;HGNC:1399;HGNC:815;HGNC:4572;HGNC:9706;HGNC:11433;HGNC:4573;HGNC:8996;HGNC:14986;HGNC:15469;HGNC:11175;HGNC:11138;HGNC:978…	BIN1;TPD52;PPP3CA;RTN3;VGF;SH3GL1;MADD;HABP4;AP2B1;AP2S1;RAP2A;OLFM1;ROGDI;CPLX1;SYNJ1;AMPH;DNM3;ADD2;SGIP1;DBNL;PTK2B;PRKCE;NCS1;SNCB;NEFM;NEFL;CNTNAP1;CACNA2D1;ATP2B2;GRIA2;NECTIN1;STX1A;GRIA3;PIP5K1C;SNAP91;DNAJC6;SNX4;SNCA;RAB4B;SYN3;ATP6V1F;SCAMP5;SLC30A3;SYNGR1;STX7;PRRT2;ATP2B3;KCNA2;EPHA4;SCN2A;ADAM23;ADGRL1;SYT7;APOE;LGI1;FXR2;WASF1;CAMK4;INA;MARK2;ARHGEF2;RTN4;EEA1;PLCB1;NEFH;ABI2;ACTN2…	BIN1;TPD52;PPP3CA;RTN3;VGF;SH3GL1;MADD;HABP4;AP2B1;AP2S1;RAP2A;OLFM1;ROGDI;CPLX1;SYNJ1;AMPH;DNM3;ADD2;SGIP1;DBNL;PTK2B;PRKCE;NCS1;SNCB;NEFM;NEFL;CNTNAP1;CACNA2D1;ATP2B2;GRIA2;NECTIN1;STX1A;GRIA3;PIP5K1C;SNAP91;DNAJC6;SNX4;SNCA;RAB4B;SYN3;ATP6V1F;SCAMP5;SLC30A3;SYNGR1;STX7;PRRT2;ATP2B3;KCNA2;EPHA4;SCN2A;ADAM23;ADGRL1;SYT7;APOE;LGI1;FXR2;WASF1;CAMK4;INA;MARK2;ARHGEF2;RTN4;EEA1;PLCB1;NEFH;ABI2;ACTN2…
GO:0097060	A1	CC	synaptic membrane	├─ synaptic membrane	GO:0045202			HGNC:9861;HGNC:17187	RAP2A;OLFM1	RAP2A;OLFM1
GO:0099243	A2	CC	extrinsic component of synaptic membrane	│ ├─ extrinsic component of synaptic membrane	GO:0097060			HGNC:17187	OLFM1	OLFM1
GO:0099699	A3	CC	integral component of synaptic membrane	│ └─ integral component of synaptic membrane	GO:0097060
GO:0098793	B1	CC	presynapse	├─ presynapse	GO:0045202	0.0192259	0.0612132	HGNC:29478;HGNC:2309;HGNC:11503;HGNC:471;HGNC:29125;HGNC:244;HGNC:25412;HGNC:10830;HGNC:2696;HGNC:9612;HGNC:10469;HGNC:9401;HGNC:3953;HGNC:11140;HGNC:7734;HGNC:7739;HGNC:8011;HGNC:1399;HGNC:815;HGNC:4572;HGNC:9706;HGNC:11433;HGNC:4573;HGNC:8996;HGNC:14986;HGNC:565;HGNC:563;HGNC:15469;HGNC:11175;HGNC:11138;HGNC:9782;HGNC:11496;HGNC:1052;HGNC:16832;HGNC:30386;HGNC:11014;HGNC:11498;HGNC:11442;HGNC:3…	ROGDI;CPLX1;SYNJ1;AMPH;DNM3;ADD2;SGIP1;SH3GL1;DBNL;PTK2B;RTN3;PRKCE;NCS1;SNCB;NEFM;NEFL;CNTNAP1;CACNA2D1;ATP2B2;GRIA2;NECTIN1;STX1A;GRIA3;PIP5K1C;SNAP91;AP2S1;AP2B1;DNAJC6;SNX4;SNCA;RAB4B;SYN3;BIN1;ATP6V1F;SCAMP5;SLC30A3;SYNGR1;STX7;PRRT2;ATP2B3;KCNA2;EPHA4;SCN2A;ADAM23;ADGRL1;SYT7	ROGDI;CPLX1;SYNJ1;AMPH;DNM3;ADD2;SGIP1;SH3GL1;DBNL;PTK2B;RTN3;PRKCE;NCS1;SNCB;NEFM;NEFL;CNTNAP1;CACNA2D1;ATP2B2;GRIA2;NECTIN1;STX1A;GRIA3;PIP5K1C;SNAP91;AP2S1;AP2B1;DNAJC6;SNX4;SNCA;RAB4B;SYN3;BIN1;ATP6V1F;SCAMP5;SLC30A3;SYNGR1;STX7;PRRT2;ATP2B3;KCNA2;EPHA4;SCN2A;ADAM23;ADGRL1;SYT7
GO:0099523	B2	CC	presynaptic cytosol	│ ├─ presynaptic cytosol	GO:0098793	0.551338	0.551338	HGNC:9401;HGNC:3953;HGNC:11140	PRKCE;NCS1;SNCB	PRKCE;NCS1;SNCB
GO:0099569	B3	CC	presynaptic cytoskeleton	│ ├─ presynaptic cytoskeleton	GO:0098793			HGNC:7734;HGNC:7739	NEFM;NEFL	NEFM;NEFL
GO:0099182	B12	CC	presynaptic intermediate filament cytoskeleton	│ │ ├─ presynaptic intermediate filament cytoskeleton	GO:0099569			HGNC:7734;HGNC:7739	NEFM;NEFL	NEFM;NEFL
GO:0099143	B13	CC	presynaptic actin cytoskeleton	│ │ └─ presynaptic actin cytoskeleton	GO:0099569
GO:0048786	B4	CC	presynaptic active zone	│ ├─ presynaptic active zone	GO:0098793	0.281916	0.29473	HGNC:8011;HGNC:1399;HGNC:815;HGNC:4572;HGNC:9706;HGNC:11433;HGNC:4573	CNTNAP1;CACNA2D1;ATP2B2;GRIA2;NECTIN1;STX1A;GRIA3	CNTNAP1;CACNA2D1;ATP2B2;GRIA2;NECTIN1;STX1A;GRIA3
GO:0098831	B14	CC	presynaptic active zone cytoplasmic component	│ │ ├─ presynaptic active zone cytoplasmic component	GO:0048786
GO:0048787	B15	CC	presynaptic active zone membrane	│ │ └─ presynaptic active zone membrane	GO:0048786	0.0762276	0.125231	HGNC:1399;HGNC:815;HGNC:4572;HGNC:9706;HGNC:11433;HGNC:4573	CACNA2D1;ATP2B2;GRIA2;NECTIN1;STX1A;GRIA3	CACNA2D1;ATP2B2;GRIA2;NECTIN1;STX1A;GRIA3
GO:0099029	B27	CC	anchored component of presynaptic active zone membrane	│ │ ├─ anchored component of presynaptic active zone membrane	GO:0048787			HGNC:1399	CACNA2D1	CACNA2D1
GO:0098891	B28	CC	extrinsic component of presynaptic active zone membrane	│ │ ├─ extrinsic component of presynaptic active zone membrane	GO:0048787
GO:0099059	B29	CC	integral component of presynaptic active zone membrane	│ │ └─ integral component of presynaptic active zone membrane	GO:0048787	0.0385643	0.0806344	HGNC:815;HGNC:4572;HGNC:9706;HGNC:11433;HGNC:4573	ATP2B2;GRIA2;NECTIN1;STX1A;GRIA3	ATP2B2;GRIA2;NECTIN1;STX1A;GRIA3
GO:0098833	B5	CC	presynaptic endocytic zone	│ ├─ presynaptic endocytic zone	GO:0098793	0.0559272		HGNC:471;HGNC:8996;HGNC:14986;HGNC:565;HGNC:563;HGNC:15469	AMPH;PIP5K1C;SNAP91;AP2S1;AP2B1;DNAJC6	AMPH;PIP5K1C;SNAP91;AP2S1;AP2B1;DNAJC6
GO:0098835	B16	CC	presynaptic endocytic zone membrane	│ │ └─ presynaptic endocytic zone membrane	GO:0098833	0.0262075	0.0669748	HGNC:8996;HGNC:14986;HGNC:471;HGNC:565;HGNC:563;HGNC:15469	PIP5K1C;SNAP91;AMPH;AP2S1;AP2B1;DNAJC6	PIP5K1C;SNAP91;AMPH;AP2S1;AP2B1;DNAJC6
GO:0098894	B30	CC	extrinsic component of presynaptic endocytic zone membrane	│ │ └─ extrinsic component of presynaptic endocytic zone membrane	GO:0098835	0.0177331	0.0612132	HGNC:14986;HGNC:471;HGNC:565;HGNC:563;HGNC:15469	SNAP91;AMPH;AP2S1;AP2B1;DNAJC6	SNAP91;AMPH;AP2S1;AP2B1;DNAJC6
GO:0098830	B6	CC	presynaptic endosome	│ ├─ presynaptic endosome	GO:0098793			HGNC:11175	SNX4	SNX4
GO:0098954	B17	CC	presynaptic endosome membrane	│ │ └─ presynaptic endosome membrane	GO:0098830
GO:0099067	B31	CC	integral component of presynaptic endosome membrane	│ │ └─ integral component of presynaptic endosome membrane	GO:0098954
GO:0008021	B7	CC	synaptic vesicle	│ ├─ synaptic vesicle	GO:0098793	0.376657		HGNC:11138;HGNC:9782;HGNC:471;HGNC:11496;HGNC:1052;HGNC:16832;HGNC:30386;HGNC:11014;HGNC:11433;HGNC:11498;HGNC:11442	SNCA;RAB4B;AMPH;SYN3;BIN1;ATP6V1F;SCAMP5;SLC30A3;STX1A;SYNGR1;STX7	SNCA;RAB4B;AMPH;SYN3;BIN1;ATP6V1F;SCAMP5;SLC30A3;STX1A;SYNGR1;STX7
GO:0034592	B18	CC	synaptic vesicle lumen	│ │ ├─ synaptic vesicle lumen	GO:0008021
GO:0030672	B19	CC	synaptic vesicle membrane	│ │ └─ synaptic vesicle membrane	GO:0008021	0.236889	0.272436	HGNC:11138;HGNC:9782;HGNC:471;HGNC:11496;HGNC:1052;HGNC:16832;HGNC:30386;HGNC:11014;HGNC:11433;HGNC:11498;HGNC:11442	SNCA;RAB4B;AMPH;SYN3;BIN1;ATP6V1F;SCAMP5;SLC30A3;STX1A;SYNGR1;STX7	SNCA;RAB4B;AMPH;SYN3;BIN1;ATP6V1F;SCAMP5;SLC30A3;STX1A;SYNGR1;STX7
GO:0098993	B32	CC	anchored component of synaptic vesicle membrane	│ │ ├─ anchored component of synaptic vesicle membrane	GO:0030672			HGNC:9782	RAB4B	RAB4B
GO:0098850	B33	CC	extrinsic component of synaptic vesicle membrane	│ │ ├─ extrinsic component of synaptic vesicle membrane	GO:0030672	0.236901	0.272436	HGNC:471;HGNC:11496;HGNC:1052;HGNC:16832	AMPH;SYN3;BIN1;ATP6V1F	AMPH;SYN3;BIN1;ATP6V1F
GO:0030285	B34	CC	integral component of synaptic vesicle membrane	│ │ └─ integral component of synaptic vesicle membrane	GO:0030672	0.265712	0.291018	HGNC:30386;HGNC:11014;HGNC:11433;HGNC:11498;HGNC:11442	SCAMP5;SLC30A3;STX1A;SYNGR1;STX7	SCAMP5;SLC30A3;STX1A;SYNGR1;STX7
GO:0098992	B8	CC	neuronal dense core vesicle	│ ├─ neuronal dense core vesicle	GO:0098793			HGNC:1399	CACNA2D1	CACNA2D1
GO:0099013	B20	CC	neuronal dense core vesicle lumen	│ │ ├─ neuronal dense core vesicle lumen	GO:0098992
GO:0099012	B21	CC	neuronal dense core vesicle membrane	│ │ └─ neuronal dense core vesicle membrane	GO:0098992
GO:0098674	B35	CC	extrinsic component of neuronal dense core vesicle membrane	│ │ ├─ extrinsic component of neuronal dense core vesicle membrane	GO:0099012
GO:0099066	B36	CC	integral component of neuronal dense core vesicle membrane	│ │ └─ integral component of neuronal dense core vesicle membrane	GO:0099012
GO:0042734	B9	CC	presynaptic membrane	│ ├─ presynaptic membrane	GO:0098793	0.0129857	0.0612132	HGNC:815;HGNC:30500;HGNC:816;HGNC:6220;HGNC:3388;HGNC:10588;HGNC:202;HGNC:20973;HGNC:11433;HGNC:4572;HGNC:4573;HGNC:11514	ATP2B2;PRRT2;ATP2B3;KCNA2;EPHA4;SCN2A;ADAM23;ADGRL1;STX1A;GRIA2;GRIA3;SYT7	ATP2B2;PRRT2;ATP2B3;KCNA2;EPHA4;SCN2A;ADAM23;ADGRL1;STX1A;GRIA2;GRIA3;SYT7
GO:0099026	B22	CC	anchored component of presynaptic membrane	│ │ ├─ anchored component of presynaptic membrane	GO:0042734
GO:0098888	B23	CC	extrinsic component of presynaptic membrane	│ │ ├─ extrinsic component of presynaptic membrane	GO:0042734
GO:0099056	B24	CC	integral component of presynaptic membrane	│ │ └─ integral component of presynaptic membrane	GO:0042734	0.00406423	0.0521104	HGNC:816;HGNC:6220;HGNC:3388;HGNC:10588;HGNC:202;HGNC:20973;HGNC:11433;HGNC:4572;HGNC:4573;HGNC:11514;HGNC:30500	ATP2B3;KCNA2;EPHA4;SCN2A;ADAM23;ADGRL1;STX1A;GRIA2;GRIA3;SYT7;PRRT2	ATP2B3;KCNA2;EPHA4;SCN2A;ADAM23;ADGRL1;STX1A;GRIA2;GRIA3;SYT7;PRRT2
SYNGO:presyn_ribosome	B10	CC	presynaptic ribosome	│ ├─ presynaptic ribosome	GO:0098793
SYNGO:presyn_er	B11	CC	presynaptic ER	│ └─ presynaptic ER	GO:0098793
SYNGO:presyn_er_membrane	B25	CC	presynaptic ER membrane	│ ├─ presynaptic ER membrane	SYNGO:presyn_er
SYNGO:presyn_er_membrane_integral	B37	CC	integral component of presynaptic ER membrane	│ │ └─ integral component of presynaptic ER membrane	SYNGO:presyn_er_membrane
SYNGO:presyn_ser	B26	CC	presynaptic SER	│ └─ presynaptic SER	SYNGO:presyn_er
SYNGO:presyn_ser_membrane	B38	CC	presynaptic SER membrane	│ └─ presynaptic SER membrane	SYNGO:presyn_ser
SYNGO:presyn_ser_membrane_integral	B39	CC	integral component of presynaptic SER membrane	│ └─ integral component of presynaptic SER membrane	SYNGO:presyn_ser_membrane
GO:0043083	C1	CC	synaptic cleft	├─ synaptic cleft	GO:0045202			HGNC:613;HGNC:6572	APOE;LGI1	APOE;LGI1
GO:0098965	C2	CC	extracellular matrix of synaptic cleft	│ └─ extracellular matrix of synaptic cleft	GO:0043083
GO:0098794	D1	CC	postsynapse	├─ postsynapse	GO:0045202	0.100055	0.143829	HGNC:4024;HGNC:12732;HGNC:2309;HGNC:3953;HGNC:1464;HGNC:6057;HGNC:9612;HGNC:244;HGNC:2696;HGNC:3332;HGNC:682;HGNC:14085;HGNC:3185;HGNC:15917;HGNC:7734;HGNC:7739;HGNC:7737;HGNC:24011;HGNC:164;HGNC:30672;HGNC:17447;HGNC:6840;HGNC:8996;HGNC:11497;HGNC:2902;HGNC:10830;HGNC:815;HGNC:4572;HGNC:4573;HGNC:6229;HGNC:11433;HGNC:32326;HGNC:29125;HGNC:14986;HGNC:1399;HGNC:2172;HGNC:6220;HGNC:3388;HGNC:11069	FXR2;WASF1;CPLX1;NCS1;CAMK4;INA;PTK2B;ADD2;DBNL;MARK2;ARHGEF2;RTN4;EEA1;PLCB1;NEFM;NEFL;NEFH;ABI2;ACTN2;SYNPO;CLSTN1;MAP2K1;PIP5K1C;SYNGAP1;DLG3;SH3GL1;ATP2B2;GRIA2;GRIA3;KCNAB2;STX1A;IGSF9B;DNM3;SNAP91;CACNA2D1;CNTN2;KCNA2;EPHA4;SLC8A2	FXR2;WASF1;CPLX1;NCS1;CAMK4;INA;PTK2B;ADD2;DBNL;MARK2;ARHGEF2;RTN4;EEA1;PLCB1;NEFM;NEFL;NEFH;ABI2;ACTN2;SYNPO;CLSTN1;MAP2K1;PIP5K1C;SYNGAP1;DLG3;SH3GL1;ATP2B2;GRIA2;GRIA3;KCNAB2;STX1A;IGSF9B;DNM3;SNAP91;CACNA2D1;CNTN2;KCNA2;EPHA4;SLC8A2
GO:0099524	D2	CC	postsynaptic cytosol	│ ├─ postsynaptic cytosol	GO:0098794			HGNC:15917;HGNC:3953	PLCB1;NCS1	PLCB1;NCS1
GO:0099571	D3	CC	postsynaptic cytoskeleton	│ ├─ postsynaptic cytoskeleton	GO:0098794	0.0323223	0.0743413	HGNC:6057;HGNC:7734;HGNC:7739;HGNC:7737;HGNC:24011;HGNC:164	INA;NEFM;NEFL;NEFH;ABI2;ACTN2	INA;NEFM;NEFL;NEFH;ABI2;ACTN2
GO:0099160	D12	CC	postsynaptic intermediate filament cytoskeleton	│ │ ├─ postsynaptic intermediate filament cytoskeleton	GO:0099571	0.00677213	0.0521104	HGNC:6057;HGNC:7734;HGNC:7739;HGNC:7737	INA;NEFM;NEFL;NEFH	INA;NEFM;NEFL;NEFH
GO:0098871	D13	CC	postsynaptic actin cytoskeleton	│ │ ├─ postsynaptic actin cytoskeleton	GO:0099571			HGNC:24011;HGNC:164	ABI2;ACTN2	ABI2;ACTN2
GO:0150050	D14	CC	postsynaptic septin cytoskeleton	│ │ ├─ postsynaptic septin cytoskeleton	GO:0099571
GO:0099189	D15	CC	postsynaptic spectrin-associated cytoskeleton	│ │ └─ postsynaptic spectrin-associated cytoskeleton	GO:0099571
GO:0097444	D4	CC	spine apparatus	│ ├─ spine apparatus	GO:0098794			HGNC:30672;HGNC:17447	SYNPO;CLSTN1	SYNPO;CLSTN1
GO:0098897	D16	CC	spine apparatus membrane	│ │ └─ spine apparatus membrane	GO:0097444			HGNC:17447	CLSTN1	CLSTN1
GO:0099065	D30	CC	integral component of spine apparatus membrane	│ │ └─ integral component of spine apparatus membrane	GO:0098897			HGNC:17447	CLSTN1	CLSTN1
GO:0150051	D5	CC	postsynaptic Golgi apparatus	│ ├─ postsynaptic Golgi apparatus	GO:0098794
GO:0099572	D6	CC	postsynaptic specialization	│ ├─ postsynaptic specialization	GO:0098794	0.204913	0.261833	HGNC:6840;HGNC:8996;HGNC:11497;HGNC:682;HGNC:164;HGNC:2902;HGNC:10830;HGNC:6057;HGNC:9612;HGNC:815;HGNC:4572;HGNC:14085;HGNC:4573;HGNC:17447;HGNC:6229;HGNC:11433;HGNC:32326	MAP2K1;PIP5K1C;SYNGAP1;ARHGEF2;ACTN2;DLG3;SH3GL1;INA;PTK2B;ATP2B2;GRIA2;RTN4;GRIA3;CLSTN1;KCNAB2;STX1A;IGSF9B	MAP2K1;PIP5K1C;SYNGAP1;ARHGEF2;ACTN2;DLG3;SH3GL1;INA;PTK2B;ATP2B2;GRIA2;RTN4;GRIA3;CLSTN1;KCNAB2;STX1A;IGSF9B
GO:0099091	D17	CC	postsynaptic specialization, intracellular component	│ │ ├─ postsynaptic specialization, intracellular component	GO:0099572
GO:0099634	D18	CC	postsynaptic specialization membrane	│ │ ├─ postsynaptic specialization membrane	GO:0099572
GO:0098892	D31	CC	extrinsic component of postsynaptic specialization membrane	│ │ │ ├─ extrinsic component of postsynaptic specialization membrane	GO:0099634
GO:0099060	D32	CC	integral component of postsynaptic specialization membrane	│ │ │ └─ integral component of postsynaptic specialization membrane	GO:0099634
GO:0014069	D19	CC	postsynaptic density	│ │ ├─ postsynaptic density	GO:0099572	0.189016	0.255727	HGNC:6840;HGNC:8996;HGNC:11497;HGNC:682;HGNC:164;HGNC:2902;HGNC:10830;HGNC:6057;HGNC:9612;HGNC:815;HGNC:4572;HGNC:14085;HGNC:4573;HGNC:17447;HGNC:6229;HGNC:11433	MAP2K1;PIP5K1C;SYNGAP1;ARHGEF2;ACTN2;DLG3;SH3GL1;INA;PTK2B;ATP2B2;GRIA2;RTN4;GRIA3;CLSTN1;KCNAB2;STX1A	MAP2K1;PIP5K1C;SYNGAP1;ARHGEF2;ACTN2;DLG3;SH3GL1;INA;PTK2B;ATP2B2;GRIA2;RTN4;GRIA3;CLSTN1;KCNAB2;STX1A
GO:0099092	D33	CC	postsynaptic density, intracellular component	│ │ │ ├─ postsynaptic density, intracellular component	GO:0014069	0.0521608	0.0990461	HGNC:11497;HGNC:682;HGNC:164;HGNC:2902;HGNC:10830;HGNC:6057;HGNC:9612	SYNGAP1;ARHGEF2;ACTN2;DLG3;SH3GL1;INA;PTK2B	SYNGAP1;ARHGEF2;ACTN2;DLG3;SH3GL1;INA;PTK2B
GO:0098839	D34	CC	postsynaptic density membrane	│ │ │ └─ postsynaptic density membrane	GO:0014069	0.018266	0.0612132	HGNC:164;HGNC:815;HGNC:4572;HGNC:14085;HGNC:4573;HGNC:17447;HGNC:6229;HGNC:11433	ACTN2;ATP2B2;GRIA2;RTN4;GRIA3;CLSTN1;KCNAB2;STX1A	ACTN2;ATP2B2;GRIA2;RTN4;GRIA3;CLSTN1;KCNAB2;STX1A
GO:0099031	D40	CC	anchored component of postsynaptic density membrane	│ │ │ ├─ anchored component of postsynaptic density membrane	GO:0098839
GO:0099147	D41	CC	extrinsic component of postsynaptic density membrane	│ │ │ ├─ extrinsic component of postsynaptic density membrane	GO:0098839
GO:0099061	D42	CC	integral component of postsynaptic density membrane	│ │ │ └─ integral component of postsynaptic density membrane	GO:0098839	0.00679701	0.0521104	HGNC:815;HGNC:4572;HGNC:14085;HGNC:4573;HGNC:17447;HGNC:6229;HGNC:11433	ATP2B2;GRIA2;RTN4;GRIA3;CLSTN1;KCNAB2;STX1A	ATP2B2;GRIA2;RTN4;GRIA3;CLSTN1;KCNAB2;STX1A
GO:0099629	D20	CC	postsynaptic specialization of symmetric synapse	│ │ └─ postsynaptic specialization of symmetric synapse	GO:0099572			HGNC:32326	IGSF9B	IGSF9B
GO:0098843	D7	CC	postsynaptic endocytic zone	│ ├─ postsynaptic endocytic zone	GO:0098794			HGNC:29125	DNM3	DNM3
GO:0098844	D21	CC	postsynaptic endocytic zone membrane	│ │ └─ postsynaptic endocytic zone membrane	GO:0098843			HGNC:29125	DNM3	DNM3
GO:0098845	D8	CC	postsynaptic endosome	│ ├─ postsynaptic endosome	GO:0098794			HGNC:17447	CLSTN1	CLSTN1
GO:0098895	D22	CC	postsynaptic endosome membrane	│ │ ├─ postsynaptic endosome membrane	GO:0098845
GO:0098999	D35	CC	extrinsic component of postsynaptic endosome membrane	│ │ │ └─ extrinsic component of postsynaptic endosome membrane	GO:0098895
GO:0098842	D23	CC	postsynaptic early endosome	│ │ ├─ postsynaptic early endosome	GO:0098845
GO:0098896	D36	CC	postsynaptic early endosome membrane	│ │ │ └─ postsynaptic early endosome membrane	GO:0098842
GO:0098998	D43	CC	extrinsic component of postsynaptic early endosome membrane	│ │ │ └─ extrinsic component of postsynaptic early endosome membrane	GO:0098896
GO:0098837	D24	CC	postsynaptic recycling endosome	│ │ └─ postsynaptic recycling endosome	GO:0098845
GO:0098944	D37	CC	postsynaptic recycling endosome membrane	│ │ └─ postsynaptic recycling endosome membrane	GO:0098837
GO:0099033	D44	CC	anchored component of postsynaptic recycling endosome membrane	│ │ └─ anchored component of postsynaptic recycling endosome membrane	GO:0098944
GO:0045211	D9	CC	postsynaptic membrane	│ ├─ postsynaptic membrane	GO:0098794	0.0559826	0.0990461	HGNC:14986;HGNC:1399;HGNC:2172;HGNC:815;HGNC:6220;HGNC:3388;HGNC:11069;HGNC:4572;HGNC:4573	SNAP91;CACNA2D1;CNTN2;ATP2B2;KCNA2;EPHA4;SLC8A2;GRIA2;GRIA3	SNAP91;CACNA2D1;CNTN2;ATP2B2;KCNA2;EPHA4;SLC8A2;GRIA2;GRIA3
GO:0099025	D25	CC	anchored component of postsynaptic membrane	│ │ ├─ anchored component of postsynaptic membrane	GO:0045211			HGNC:1399;HGNC:2172	CACNA2D1;CNTN2	CACNA2D1;CNTN2
GO:0098890	D26	CC	extrinsic component of postsynaptic membrane	│ │ ├─ extrinsic component of postsynaptic membrane	GO:0045211
GO:0099055	D27	CC	integral component of postsynaptic membrane	│ │ └─ integral component of postsynaptic membrane	GO:0045211	0.0877538	0.134556	HGNC:815;HGNC:6220;HGNC:3388;HGNC:11069;HGNC:4572;HGNC:4573	ATP2B2;KCNA2;EPHA4;SLC8A2;GRIA2;GRIA3	ATP2B2;KCNA2;EPHA4;SLC8A2;GRIA2;GRIA3
SYNGO:postsyn_ribosome	D10	CC	postsynaptic ribosome	│ ├─ postsynaptic ribosome	GO:0098794
SYNGO:postsyn_er	D11	CC	postsynaptic ER	│ └─ postsynaptic ER	GO:0098794
SYNGO:postsyn_er_membrane	D28	CC	postsynaptic ER membrane	│ ├─ postsynaptic ER membrane	SYNGO:postsyn_er
SYNGO:postsyn_er_membrane_integral	D38	CC	integral component of postsynaptic ER membrane	│ │ └─ integral component of postsynaptic ER membrane	SYNGO:postsyn_er_membrane
SYNGO:postsyn_ser	D29	CC	postsynaptic SER	│ └─ postsynaptic SER	SYNGO:postsyn_er
SYNGO:postsyn_ser_membrane	D39	CC	postsynaptic SER membrane	│ └─ postsynaptic SER membrane	SYNGO:postsyn_ser
SYNGO:postsyn_ser_membrane_integral	D45	CC	integral component of postsynaptic SER membrane	│ └─ integral component of postsynaptic SER membrane	SYNGO:postsyn_ser_membrane
GO:0099544	E1	CC	extrasynaptic space	└─ extrasynaptic space	GO:0045202
GO:0098966	E2	CC	perisynaptic extracellular matrix	└─ perisynaptic extracellular matrix	GO:0099544
SYNGO:synprocess		BP	process in the synapse	process in the synapse		0.00378716	0.0181784	HGNC:3953;HGNC:816;HGNC:4572;HGNC:4573;HGNC:6220;HGNC:10588;HGNC:11496;HGNC:11498;HGNC:24011;HGNC:11433;HGNC:18539;HGNC:11514;HGNC:30500;HGNC:2309;HGNC:11014;HGNC:16832;HGNC:29125;HGNC:14986;HGNC:471;HGNC:1052;HGNC:11138;HGNC:11140;HGNC:563;HGNC:2876;HGNC:565;HGNC:30386;HGNC:8996;HGNC:11503;HGNC:15469;HGNC:9401;HGNC:30672;HGNC:815;HGNC:11069;HGNC:2902;HGNC:9861;HGNC:6572;HGNC:6840;HGNC:10886;HGNC…	NCS1;ATP2B3;GRIA2;GRIA3;KCNA2;SCN2A;SYN3;SYNGR1;ABI2;STX1A;STX1B;SYT7;PRRT2;CPLX1;SLC30A3;ATP6V1F;DNM3;SNAP91;AMPH;BIN1;SNCA;SNCB;AP2B1;DIAPH1;AP2S1;SCAMP5;PIP5K1C;SYNJ1;DNAJC6;PRKCE;SYNPO;ATP2B2;SLC8A2;DLG3;RAP2A;LGI1;MAP2K1;SIRT2;CAMK4;PLCB1;VGF;SYNGAP1;RTN4;EEA1;PPP3CA;INA;NEFL;NEFH;PTK2B;MARK2;WASF1;TUBB;APOE;NECTIN1;ACTN1;DBNL;IGSF9B;ADD2;EPHA4;CLSTN1;CNTNAP1;PLXNA4;MADD	NCS1;ATP2B3;GRIA2;GRIA3;KCNA2;SCN2A;SYN3;SYNGR1;ABI2;STX1A;STX1B;SYT7;PRRT2;CPLX1;SLC30A3;ATP6V1F;DNM3;SNAP91;AMPH;BIN1;SNCA;SNCB;AP2B1;DIAPH1;AP2S1;SCAMP5;PIP5K1C;SYNJ1;DNAJC6;PRKCE;SYNPO;ATP2B2;SLC8A2;DLG3;RAP2A;LGI1;MAP2K1;SIRT2;CAMK4;PLCB1;VGF;SYNGAP1;RTN4;EEA1;PPP3CA;INA;NEFL;NEFH;PTK2B;MARK2;WASF1;TUBB;APOE;NECTIN1;ACTN1;DBNL;IGSF9B;ADD2;EPHA4;CLSTN1;CNTNAP1;PLXNA4;MADD
SYNGO:presynprocess	F1	BP	process in the presynapse	├─ process in the presynapse	SYNGO:synprocess	0.00274524	0.0164714	HGNC:3953;HGNC:816;HGNC:4572;HGNC:4573;HGNC:6220;HGNC:10588;HGNC:11496;HGNC:11498;HGNC:24011;HGNC:11433;HGNC:18539;HGNC:11514;HGNC:30500;HGNC:2309;HGNC:11014;HGNC:16832;HGNC:29125;HGNC:14986;HGNC:471;HGNC:1052;HGNC:11138;HGNC:11140;HGNC:563;HGNC:2876;HGNC:565;HGNC:30386;HGNC:8996;HGNC:11503;HGNC:15469;HGNC:9401	NCS1;ATP2B3;GRIA2;GRIA3;KCNA2;SCN2A;SYN3;SYNGR1;ABI2;STX1A;STX1B;SYT7;PRRT2;CPLX1;SLC30A3;ATP6V1F;DNM3;SNAP91;AMPH;BIN1;SNCA;SNCB;AP2B1;DIAPH1;AP2S1;SCAMP5;PIP5K1C;SYNJ1;DNAJC6;PRKCE	NCS1;ATP2B3;GRIA2;GRIA3;KCNA2;SCN2A;SYN3;SYNGR1;ABI2;STX1A;STX1B;SYT7;PRRT2;CPLX1;SLC30A3;ATP6V1F;DNM3;SNAP91;AMPH;BIN1;SNCA;SNCB;AP2B1;DIAPH1;AP2S1;SCAMP5;PIP5K1C;SYNJ1;DNAJC6;PRKCE
GO:0099509	F2	BP	regulation of presynaptic cytosolic calcium levels	│ ├─ regulation of presynaptic cytosolic calcium levels	SYNGO:presynprocess			HGNC:3953;HGNC:816	NCS1;ATP2B3	NCS1;ATP2B3
GO:1905056	F11	BP	ATPase-coupled calcium ion transmembrane transporter activity involved in regulation of presynaptic cytosolic calcium levels	│ │ ├─ ATPase-coupled calcium ion transmembrane transporter activity involved in regulation of presynaptic cytosolic calcium levels	GO:0099509			HGNC:816	ATP2B3	ATP2B3
GO:0099534	F12	BP	calcium ion binding involved in regulation of presynaptic cytosolic calcium levels	│ │ ├─ calcium ion binding involved in regulation of presynaptic cytosolic calcium levels	GO:0099509
GO:0099626	F13	BP	voltage-gated calcium channel activity involved in regulation of presynaptic cytosolic calcium levels	│ │ └─ voltage-gated calcium channel activity involved in regulation of presynaptic cytosolic calcium levels	GO:0099509
GO:0099505	F3	BP	regulation of presynaptic membrane potential	│ ├─ regulation of presynaptic membrane potential	SYNGO:presynprocess	0.0336862	0.0808468	HGNC:4572;HGNC:4573;HGNC:6220;HGNC:10588	GRIA2;GRIA3;KCNA2;SCN2A	GRIA2;GRIA3;KCNA2;SCN2A
GO:0099507	F14	BP	ligand-gated ion channel activity involved in regulation of presynaptic membrane potential	│ │ ├─ ligand-gated ion channel activity involved in regulation of presynaptic membrane potential	GO:0099505			HGNC:4572;HGNC:4573	GRIA2;GRIA3	GRIA2;GRIA3
GO:0099508	F15	BP	voltage-gated ion channel activity involved in regulation of presynaptic membrane potential	│ │ ├─ voltage-gated ion channel activity involved in regulation of presynaptic membrane potential	GO:0099505			HGNC:6220;HGNC:10588	KCNA2;SCN2A	KCNA2;SCN2A
GO:0150047	F16	BP	G protein-coupled neurotransmitter receptor activity involved in regulation of presynaptic membrane potential	│ │ ├─ G protein-coupled neurotransmitter receptor activity involved in regulation of presynaptic membrane potential	GO:0099505
GO:0140232	F17	BP	intracellular cAMP-activated cation channel activity involved in regulation of presynaptic membrane potential	│ │ └─ intracellular cAMP-activated cation channel activity involved in regulation of presynaptic membrane potential	GO:0099505
GO:0140238	F4	BP	presynaptic endocytosis	│ ├─ presynaptic endocytosis	SYNGO:presynprocess
GO:0099504	F5	BP	synaptic vesicle cycle	│ ├─ synaptic vesicle cycle	SYNGO:presynprocess	0.00986425	0.039457	HGNC:11496;HGNC:11498;HGNC:24011;HGNC:11433;HGNC:18539;HGNC:11514;HGNC:30500;HGNC:3953;HGNC:2309;HGNC:11014;HGNC:16832;HGNC:29125;HGNC:14986;HGNC:471;HGNC:1052;HGNC:11138;HGNC:11140;HGNC:563;HGNC:2876;HGNC:565;HGNC:30386;HGNC:8996;HGNC:11503;HGNC:15469	SYN3;SYNGR1;ABI2;STX1A;STX1B;SYT7;PRRT2;NCS1;CPLX1;SLC30A3;ATP6V1F;DNM3;SNAP91;AMPH;BIN1;SNCA;SNCB;AP2B1;DIAPH1;AP2S1;SCAMP5;PIP5K1C;SYNJ1;DNAJC6	SYN3;SYNGR1;ABI2;STX1A;STX1B;SYT7;PRRT2;NCS1;CPLX1;SLC30A3;ATP6V1F;DNM3;SNAP91;AMPH;BIN1;SNCA;SNCB;AP2B1;DIAPH1;AP2S1;SCAMP5;PIP5K1C;SYNJ1;DNAJC6
GO:0098693	F18	BP	regulation of synaptic vesicle cycle	│ │ ├─ regulation of synaptic vesicle cycle	GO:0099504			HGNC:11498	SYNGR1	SYNGR1
GO:0097091	F19	BP	synaptic vesicle clustering	│ │ ├─ synaptic vesicle clustering	GO:0099504			HGNC:11496;HGNC:24011	SYN3;ABI2	SYN3;ABI2
GO:0099532	F20	BP	synaptic vesicle endosomal processing	│ │ ├─ synaptic vesicle endosomal processing	GO:0099504
GO:0016182	F29	BP	synaptic vesicle budding from endosome	│ │ │ ├─ synaptic vesicle budding from endosome	GO:0099532
GO:0016189	F30	BP	synaptic vesicle to endosome fusion	│ │ │ └─ synaptic vesicle to endosome fusion	GO:0099532
GO:0016079	F21	BP	synaptic vesicle exocytosis	│ │ ├─ synaptic vesicle exocytosis	GO:0099504	0.345747	0.395139	HGNC:11433;HGNC:18539;HGNC:11514;HGNC:30500;HGNC:3953;HGNC:2309	STX1A;STX1B;SYT7;PRRT2;NCS1;CPLX1	STX1A;STX1B;SYT7;PRRT2;NCS1;CPLX1
GO:0099502	F31	BP	calcium-dependent activation of synaptic vesicle fusion	│ │ │ ├─ calcium-dependent activation of synaptic vesicle fusion	GO:0016079			HGNC:11514;HGNC:30500	SYT7;PRRT2	SYT7;PRRT2
GO:0150037	F41	BP	regulation of calcium-dependent activation of synaptic vesicle fusion	│ │ │ │ └─ regulation of calcium-dependent activation of synaptic vesicle fusion	GO:0099502			HGNC:30500	PRRT2	PRRT2
GO:2000300	F32	BP	regulation of synaptic vesicle exocytosis	│ │ │ ├─ regulation of synaptic vesicle exocytosis	GO:0016079			HGNC:3953	NCS1	NCS1
GO:0016081	F33	BP	synaptic vesicle docking	│ │ │ ├─ synaptic vesicle docking	GO:0016079
GO:0099148	F42	BP	regulation of synaptic vesicle docking	│ │ │ │ └─ regulation of synaptic vesicle docking	GO:0016081
GO:0031629	F34	BP	synaptic vesicle fusion to presynaptic active zone membrane	│ │ │ ├─ synaptic vesicle fusion to presynaptic active zone membrane	GO:0016079			HGNC:18539;HGNC:2309	STX1B;CPLX1	STX1B;CPLX1
GO:0031630	F43	BP	regulation of synaptic vesicle fusion to presynaptic active zone membrane	│ │ │ │ └─ regulation of synaptic vesicle fusion to presynaptic active zone membrane	GO:0031629			HGNC:2309	CPLX1	CPLX1
GO:0016082	F35	BP	synaptic vesicle priming	│ │ │ └─ synaptic vesicle priming	GO:0016079
GO:0010807	F44	BP	regulation of synaptic vesicle priming	│ │ │ └─ regulation of synaptic vesicle priming	GO:0016082
GO:0098700	F22	BP	synaptic vesicle neurotransmitter loading	│ │ ├─ synaptic vesicle neurotransmitter loading	GO:0099504
GO:0099162	F36	BP	regulation of synaptic vesicle neurotransmitter loading	│ │ │ └─ regulation of synaptic vesicle neurotransmitter loading	GO:0098700
GO:0099180	F23	BP	zinc ion import into synaptic vesicle	│ │ ├─ zinc ion import into synaptic vesicle	GO:0099504			HGNC:11014	SLC30A3	SLC30A3
GO:0097401	F24	BP	synaptic vesicle proton loading	│ │ ├─ synaptic vesicle proton loading	GO:0099504			HGNC:16832	ATP6V1F	ATP6V1F
GO:1901546	F37	BP	regulation of proton loading	│ │ │ └─ regulation of proton loading	GO:0097401
GO:0048488	F25	BP	synaptic vesicle endocytosis	│ │ └─ synaptic vesicle endocytosis	GO:0099504	0.00073154	0.00819118	HGNC:29125;HGNC:14986;HGNC:471;HGNC:1052;HGNC:11138;HGNC:11140;HGNC:563;HGNC:2876;HGNC:565;HGNC:30386;HGNC:8996;HGNC:11514;HGNC:11503;HGNC:15469	DNM3;SNAP91;AMPH;BIN1;SNCA;SNCB;AP2B1;DIAPH1;AP2S1;SCAMP5;PIP5K1C;SYT7;SYNJ1;DNAJC6	DNM3;SNAP91;AMPH;BIN1;SNCA;SNCB;AP2B1;DIAPH1;AP2S1;SCAMP5;PIP5K1C;SYT7;SYNJ1;DNAJC6
GO:1900242	F38	BP	regulation of synaptic vesicle endocytosis	│ │ ├─ regulation of synaptic vesicle endocytosis	GO:0048488	0.0861758	0.144313	HGNC:30386;HGNC:8996;HGNC:11514	SCAMP5;PIP5K1C;SYT7	SCAMP5;PIP5K1C;SYT7
GO:0016185	F39	BP	synaptic vesicle budding from presynaptic endocytic zone membrane	│ │ ├─ synaptic vesicle budding from presynaptic endocytic zone membrane	GO:0048488
GO:0098694	F45	BP	regulation of synaptic vesicle budding from presynaptic endocytic zone membrane	│ │ │ └─ regulation of synaptic vesicle budding from presynaptic endocytic zone membrane	GO:0016185
GO:0016191	F40	BP	synaptic vesicle uncoating	│ │ └─ synaptic vesicle uncoating	GO:0048488			HGNC:11503;HGNC:15469	SYNJ1;DNAJC6	SYNJ1;DNAJC6
GO:0099525	F6	BP	presynaptic dense core vesicle exocytosis	│ ├─ presynaptic dense core vesicle exocytosis	SYNGO:presynprocess			HGNC:29125;HGNC:9401	DNM3;PRKCE	DNM3;PRKCE
GO:0099161	F26	BP	regulation of presynaptic dense core vesicle exocytosis	│ │ └─ regulation of presynaptic dense core vesicle exocytosis	GO:0099525			HGNC:9401	PRKCE	PRKCE
GO:0001504	F7	BP	neurotransmitter uptake	│ ├─ neurotransmitter uptake	SYNGO:presynprocess
GO:0098810	F8	BP	neurotransmitter reuptake	│ ├─ neurotransmitter reuptake	SYNGO:presynprocess
GO:0051580	F27	BP	regulation of neurotransmitter uptake	│ │ └─ regulation of neurotransmitter uptake	GO:0098810
SYNGO:presyn_chaperoneProteinFolding	F9	BP	presynaptic chaperone-mediated protein folding	│ ├─ presynaptic chaperone-mediated protein folding	SYNGO:presynprocess
GO:0098928	F10	BP	presynaptic signaling pathway	│ └─ presynaptic signaling pathway	SYNGO:presynprocess
GO:0099526	F28	BP	presynapse to nucleus signaling pathway	│ └─ presynapse to nucleus signaling pathway	GO:0098928
SYNGO:postsynprocess	G1	BP	process in the postsynapse	├─ process in the postsynapse	SYNGO:synprocess	0.0184023	0.0531848	HGNC:30672;HGNC:815;HGNC:11069;HGNC:4572;HGNC:4573;HGNC:6220;HGNC:2902;HGNC:9861;HGNC:6572;HGNC:6840;HGNC:2309;HGNC:563;HGNC:565;HGNC:10886;HGNC:8996;HGNC:11503;HGNC:1464	SYNPO;ATP2B2;SLC8A2;GRIA2;GRIA3;KCNA2;DLG3;RAP2A;LGI1;MAP2K1;CPLX1;AP2B1;AP2S1;SIRT2;PIP5K1C;SYNJ1;CAMK4	SYNPO;ATP2B2;SLC8A2;GRIA2;GRIA3;KCNA2;DLG3;RAP2A;LGI1;MAP2K1;CPLX1;AP2B1;AP2S1;SIRT2;PIP5K1C;SYNJ1;CAMK4
GO:0099566	G2	BP	regulation of postsynaptic cytosolic calcium levels	│ ├─ regulation of postsynaptic cytosolic calcium levels	SYNGO:postsynprocess	0.0861758	0.144313	HGNC:30672;HGNC:815;HGNC:11069	SYNPO;ATP2B2;SLC8A2	SYNPO;ATP2B2;SLC8A2
GO:1905059	G8	BP	ATPase-coupled calcium ion transmembrane transporter activity involved in regulation of postsynaptic cytosolic calcium levels	│ │ ├─ ATPase-coupled calcium ion transmembrane transporter activity involved in regulation of postsynaptic cytosolic calcium levels	GO:0099566			HGNC:815	ATP2B2	ATP2B2
GO:0099567	G9	BP	calcium ion binding involved in regulation of postsynaptic cytosolic calcium levels	│ │ ├─ calcium ion binding involved in regulation of postsynaptic cytosolic calcium levels	GO:0099566
GO:1905060	G10	BP	calcium:cation antiporter activity involved in regulation of postsynaptic cytosolic calcium ion levels	│ │ ├─ calcium:cation antiporter activity involved in regulation of postsynaptic cytosolic calcium ion levels	GO:0099566			HGNC:11069	SLC8A2	SLC8A2
GO:0098695	G11	BP	inositol 1,4,5-trisphosphate receptor activity involved in regulation of postsynaptic cytosolic calcium levels	│ │ ├─ inositol 1,4,5-trisphosphate receptor activity involved in regulation of postsynaptic cytosolic calcium levels	GO:0099566
GO:0099583	G12	BP	neurotransmitter receptor activity involved in regulation of postsynaptic cytosolic calcium levels	│ │ └─ neurotransmitter receptor activity involved in regulation of postsynaptic cytosolic calcium levels	GO:0099566
GO:0098872	G22	BP	G-protein coupled neurotransmitter receptor activity involved in regulation of postsynaptic cytosolic calcium levels	│ │ └─ G-protein coupled neurotransmitter receptor activity involved in regulation of postsynaptic cytosolic calcium levels	GO:0099583
GO:0060078	G3	BP	regulation of postsynaptic membrane potential	│ ├─ regulation of postsynaptic membrane potential	SYNGO:postsynprocess	0.109301	0.163952	HGNC:4572;HGNC:4573;HGNC:6220	GRIA2;GRIA3;KCNA2	GRIA2;GRIA3;KCNA2
GO:0140233	G13	BP	intracellular cAMP-activated cation channel activity involved in regulation of postsynaptic membrane potential	│ │ ├─ intracellular cAMP-activated cation channel activity involved in regulation of postsynaptic membrane potential	GO:0060078
GO:0099579	G23	BP	G protein-coupled neurotransmitter receptor activity involved in regulation of postsynaptic membrane potential	│ │ │ └─ G protein-coupled neurotransmitter receptor activity involved in regulation of postsynaptic membrane potential	GO:0140233
GO:1904315	G14	BP	transmitter-gated ion channel activity involved in regulation of postsynaptic membrane potential	│ │ ├─ transmitter-gated ion channel activity involved in regulation of postsynaptic membrane potential	GO:0060078			HGNC:4572;HGNC:4573	GRIA2;GRIA3	GRIA2;GRIA3
GO:1905030	G15	BP	voltage-gated ion channel activity involved in regulation of postsynaptic membrane potential	│ │ └─ voltage-gated ion channel activity involved in regulation of postsynaptic membrane potential	GO:0060078			HGNC:6220	KCNA2	KCNA2
GO:0098962	G4	BP	regulation of postsynaptic neurotransmitter receptor activity	│ ├─ regulation of postsynaptic neurotransmitter receptor activity	SYNGO:postsynprocess
GO:0099072	G5	BP	regulation of postsynaptic membrane neurotransmitter receptor levels	│ ├─ regulation of postsynaptic membrane neurotransmitter receptor levels	SYNGO:postsynprocess	0.130587	0.184358	HGNC:2902;HGNC:9861;HGNC:6572;HGNC:6840;HGNC:2309;HGNC:563;HGNC:565;HGNC:10886;HGNC:8996;HGNC:11503	DLG3;RAP2A;LGI1;MAP2K1;CPLX1;AP2B1;AP2S1;SIRT2;PIP5K1C;SYNJ1	DLG3;RAP2A;LGI1;MAP2K1;CPLX1;AP2B1;AP2S1;SIRT2;PIP5K1C;SYNJ1
GO:0099645	G16	BP	neurotransmitter receptor localization to postsynaptic specialization membrane	│ │ ├─ neurotransmitter receptor localization to postsynaptic specialization membrane	GO:0099072			HGNC:6572;HGNC:6840	LGI1;MAP2K1	LGI1;MAP2K1
GO:0098696	G24	BP	regulation of neurotransmitter receptor localization to postsynaptic specialization membrane	│ │ │ └─ regulation of neurotransmitter receptor localization to postsynaptic specialization membrane	GO:0099645			HGNC:6840	MAP2K1	MAP2K1
GO:0098967	G17	BP	exocytic insertion of neurotransmitter receptor to postsynaptic membrane	│ │ ├─ exocytic insertion of neurotransmitter receptor to postsynaptic membrane	GO:0099072			HGNC:2309	CPLX1	CPLX1
GO:0099145	G25	BP	regulation of exocytic insertion of neurotransmitter receptor to postsynaptic membrane	│ │ │ └─ regulation of exocytic insertion of neurotransmitter receptor to postsynaptic membrane	GO:0098967			HGNC:2309	CPLX1	CPLX1
GO:0098970	G18	BP	postsynaptic neurotransmitter receptor diffusion trapping	│ │ ├─ postsynaptic neurotransmitter receptor diffusion trapping	GO:0099072
GO:0150054	G26	BP	regulation of postsynaptic neurotransmitter receptor diffusion trapping	│ │ │ └─ regulation of postsynaptic neurotransmitter receptor diffusion trapping	GO:0098970
GO:0098884	G19	BP	postsynaptic neurotransmitter receptor endocytosis	│ │ └─ postsynaptic neurotransmitter receptor endocytosis	GO:0099072	0.0828898	0.144313	HGNC:563;HGNC:565;HGNC:10886;HGNC:8996;HGNC:11503	AP2B1;AP2S1;SIRT2;PIP5K1C;SYNJ1	AP2B1;AP2S1;SIRT2;PIP5K1C;SYNJ1
GO:0099149	G27	BP	regulation of postsynaptic neurotransmitter receptor endocytosis	│ │ └─ regulation of postsynaptic neurotransmitter receptor endocytosis	GO:0098884	0.189898	0.227878	HGNC:10886;HGNC:8996;HGNC:11503	SIRT2;PIP5K1C;SYNJ1	SIRT2;PIP5K1C;SYNJ1
GO:0150038	G6	BP	postsynaptic dense core vesicle exocytosis	│ ├─ postsynaptic dense core vesicle exocytosis	SYNGO:postsynprocess
GO:0150044	G20	BP	regulation of postsynaptic dense core vesicle exocytosis	│ │ └─ regulation of postsynaptic dense core vesicle exocytosis	GO:0150038
GO:0098926	G7	BP	postsynaptic signaling pathway	│ └─ postsynaptic signaling pathway	SYNGO:postsynprocess			HGNC:1464	CAMK4	CAMK4
GO:0099527	G21	BP	postsynapse to nucleus signaling pathway	│ └─ postsynapse to nucleus signaling pathway	GO:0098926			HGNC:1464	CAMK4	CAMK4
GO:1905539	G28	BP	regulation of postsynapse to nucleus signaling pathway	│ └─ regulation of postsynapse to nucleus signaling pathway	GO:0099527
GO:0099536	H1	BP	synaptic signaling	├─ synaptic signaling	SYNGO:synprocess	0.0754485		HGNC:15917;HGNC:12684;HGNC:11497;HGNC:14085;HGNC:9401;HGNC:3185;HGNC:30672;HGNC:9314;HGNC:1464;HGNC:6057;HGNC:7739;HGNC:7737;HGNC:9612	PLCB1;VGF;SYNGAP1;RTN4;PRKCE;EEA1;SYNPO;PPP3CA;CAMK4;INA;NEFL;NEFH;PTK2B	PLCB1;VGF;SYNGAP1;RTN4;PRKCE;EEA1;SYNPO;PPP3CA;CAMK4;INA;NEFL;NEFH;PTK2B
GO:0099537	H2	BP	trans-synaptic signaling	│ ├─ trans-synaptic signaling	GO:0099536	0.0754485		HGNC:15917;HGNC:12684;HGNC:11497;HGNC:14085;HGNC:9401;HGNC:3185;HGNC:30672;HGNC:9314;HGNC:1464;HGNC:6057;HGNC:7739;HGNC:7737;HGNC:9612	PLCB1;VGF;SYNGAP1;RTN4;PRKCE;EEA1;SYNPO;PPP3CA;CAMK4;INA;NEFL;NEFH;PTK2B	PLCB1;VGF;SYNGAP1;RTN4;PRKCE;EEA1;SYNPO;PPP3CA;CAMK4;INA;NEFL;NEFH;PTK2B
GO:0099541	H5	BP	trans-synaptic signaling by lipid	│ │ ├─ trans-synaptic signaling by lipid	GO:0099537			HGNC:15917	PLCB1	PLCB1
GO:0099542	H13	BP	trans-synaptic signaling by endocannabinoid	│ │ │ └─ trans-synaptic signaling by endocannabinoid	GO:0099541			HGNC:15917	PLCB1	PLCB1
GO:0098921	H21	BP	retrograde trans-synaptic signaling by endocannabinoid	│ │ │ ├─ retrograde trans-synaptic signaling by endocannabinoid	GO:0099542			HGNC:15917	PLCB1	PLCB1
GO:0099178	H26	BP	regulation of retrograde trans-synaptic signaling by endocanabinoid	│ │ │ │ └─ regulation of retrograde trans-synaptic signaling by endocanabinoid	GO:0098921			HGNC:15917	PLCB1	PLCB1
GO:0099553	H22	BP	trans-synaptic signaling by endocannabinoid, modulating synaptic transmission	│ │ │ └─ trans-synaptic signaling by endocannabinoid, modulating synaptic transmission	GO:0099542
GO:0150036	H27	BP	regulation of trans-synaptic signaling by endocannabinoid, modulating synaptic transmission	│ │ │ └─ regulation of trans-synaptic signaling by endocannabinoid, modulating synaptic transmission	GO:0099553
GO:0099540	H6	BP	trans-synaptic signaling by neuropeptide	│ │ ├─ trans-synaptic signaling by neuropeptide	GO:0099537
GO:0099543	H7	BP	trans-synaptic signaling by soluble gas	│ │ ├─ trans-synaptic signaling by soluble gas	GO:0099537
GO:0099548	H14	BP	trans-synaptic signaling by nitric oxide	│ │ │ └─ trans-synaptic signaling by nitric oxide	GO:0099543
GO:0099555	H23	BP	trans-synaptic signaling by nitric oxide, modulating synaptic transmission	│ │ │ └─ trans-synaptic signaling by nitric oxide, modulating synaptic transmission	GO:0099548
GO:0098925	H28	BP	retrograde trans-synaptic signaling by nitric oxide, modulating synaptic transmission	│ │ │ └─ retrograde trans-synaptic signaling by nitric oxide, modulating synaptic transmission	GO:0099555
GO:0099545	H8	BP	trans-synaptic signaling by trans-synaptic complex	│ │ ├─ trans-synaptic signaling by trans-synaptic complex	GO:0099537
GO:0098942	H15	BP	retrograde trans-synaptic signaling by trans-synaptic protein complex	│ │ │ ├─ retrograde trans-synaptic signaling by trans-synaptic protein complex	GO:0099545
GO:0099557	H16	BP	trans-synaptic signaling by trans-synaptic complex, modulating synaptic transmission	│ │ │ └─ trans-synaptic signaling by trans-synaptic complex, modulating synaptic transmission	GO:0099545
GO:0099157	H9	BP	trans-synaptic signalling via exosome	│ │ ├─ trans-synaptic signalling via exosome	GO:0099537
GO:0099183	H10	BP	trans-synaptic signaling by BDNF, modulating synaptic transmission	│ │ ├─ trans-synaptic signaling by BDNF, modulating synaptic transmission	GO:0099537
GO:0150035	H17	BP	regulation of trans-synaptic signaling by BDNF, modulating synaptic transmission	│ │ │ └─ regulation of trans-synaptic signaling by BDNF, modulating synaptic transmission	GO:0099183
GO:0007268	H11	BP	chemical synaptic transmission	│ │ └─ chemical synaptic transmission	GO:0099537	0.0437653	0.095488	HGNC:12684;HGNC:11497;HGNC:14085;HGNC:9401;HGNC:3185;HGNC:30672;HGNC:15917;HGNC:9314;HGNC:1464;HGNC:6057;HGNC:7739;HGNC:7737;HGNC:9612	VGF;SYNGAP1;RTN4;PRKCE;EEA1;SYNPO;PLCB1;PPP3CA;CAMK4;INA;NEFL;NEFH;PTK2B	VGF;SYNGAP1;RTN4;PRKCE;EEA1;SYNPO;PLCB1;PPP3CA;CAMK4;INA;NEFL;NEFH;PTK2B
GO:0050804	H18	BP	modulation of chemical synaptic transmission	│ │ ├─ modulation of chemical synaptic transmission	GO:0007268	0.853359	0.853359	HGNC:12684;HGNC:11497;HGNC:14085	VGF;SYNGAP1;RTN4	VGF;SYNGAP1;RTN4
GO:0099531	H19	BP	presynaptic process involved in chemical synaptic transmission	│ │ ├─ presynaptic process involved in chemical synaptic transmission	GO:0007268			HGNC:9401	PRKCE	PRKCE
GO:0099171	H24	BP	presynaptic modulation of chemical synaptic transmission	│ │ │ └─ presynaptic modulation of chemical synaptic transmission	GO:0099531			HGNC:9401	PRKCE	PRKCE
GO:0099565	H20	BP	postsynaptic process involved in chemical synaptic transmission	│ │ └─ postsynaptic process involved in chemical synaptic transmission	GO:0007268	0.000563975	0.00819118	HGNC:3185;HGNC:30672;HGNC:15917;HGNC:9314;HGNC:1464;HGNC:6057;HGNC:7739;HGNC:7737;HGNC:9612	EEA1;SYNPO;PLCB1;PPP3CA;CAMK4;INA;NEFL;NEFH;PTK2B	EEA1;SYNPO;PLCB1;PPP3CA;CAMK4;INA;NEFL;NEFH;PTK2B
GO:0099170	H25	BP	postsynaptic modulation of chemical synaptic transmission	│ │ └─ postsynaptic modulation of chemical synaptic transmission	GO:0099565	0.0010239	0.00819118	HGNC:30672;HGNC:15917;HGNC:9314;HGNC:1464;HGNC:6057;HGNC:7739;HGNC:7737;HGNC:9612	SYNPO;PLCB1;PPP3CA;CAMK4;INA;NEFL;NEFH;PTK2B	SYNPO;PLCB1;PPP3CA;CAMK4;INA;NEFL;NEFH;PTK2B
GO:0099538	H3	BP	synaptic signaling via neuropeptide	│ ├─ synaptic signaling via neuropeptide	GO:0099536			HGNC:12684	VGF	VGF
GO:0099163	H4	BP	synaptic signaling by nitric oxide	│ └─ synaptic signaling by nitric oxide	GO:0099536
GO:0150045	H12	BP	regulation of synaptic signaling by nitric oxide	│ └─ regulation of synaptic signaling by nitric oxide	GO:0099163
GO:0050808	I1	BP	synapse organization	├─ synapse organization	SYNGO:synprocess	0.0901955	0.144313	HGNC:24011;HGNC:3332;HGNC:12732;HGNC:20778;HGNC:613;HGNC:9706;HGNC:163;HGNC:29125;HGNC:2696;HGNC:6057;HGNC:7739;HGNC:7737;HGNC:2902;HGNC:32326;HGNC:244;HGNC:9861;HGNC:9612;HGNC:3388;HGNC:17447;HGNC:8011;HGNC:9102;HGNC:11497	ABI2;MARK2;WASF1;TUBB;APOE;NECTIN1;ACTN1;DNM3;DBNL;INA;NEFL;NEFH;DLG3;IGSF9B;ADD2;RAP2A;PTK2B;EPHA4;CLSTN1;CNTNAP1;PLXNA4;SYNGAP1	ABI2;MARK2;WASF1;TUBB;APOE;NECTIN1;ACTN1;DNM3;DBNL;INA;NEFL;NEFH;DLG3;IGSF9B;ADD2;RAP2A;PTK2B;EPHA4;CLSTN1;CNTNAP1;PLXNA4;SYNGAP1
GO:0099172	I2	BP	presynapse organization	│ ├─ presynapse organization	GO:0050808
GO:0099174	I16	BP	regulation of presynapse organization	│ │ └─ regulation of presynapse organization	GO:0099172
GO:0099173	I3	BP	postsynapse organization	│ ├─ postsynapse organization	GO:0050808			HGNC:24011;HGNC:3332	ABI2;MARK2	ABI2;MARK2
GO:0099175	I17	BP	regulation of postsynapse organization	│ │ ├─ regulation of postsynapse organization	GO:0099173			HGNC:3332	MARK2	MARK2
GO:0099084	I18	BP	postsynaptic specialization organization	│ │ └─ postsynaptic specialization organization	GO:0099173
GO:0099563	I4	BP	modification of synaptic structure	│ ├─ modification of synaptic structure	GO:0050808			HGNC:12732	WASF1	WASF1
GO:0099010	I19	BP	modification of postsynaptic structure	│ │ └─ modification of postsynaptic structure	GO:0099563			HGNC:12732	WASF1	WASF1
GO:0099159	I34	BP	regulation of modification of postsynaptic structure	│ │ ├─ regulation of modification of postsynaptic structure	GO:0099010
GO:0098885	I35	BP	modification of postsynaptic actin cytoskeleton	│ │ └─ modification of postsynaptic actin cytoskeleton	GO:0099010			HGNC:12732	WASF1	WASF1
GO:1905274	I47	BP	regulation of modification of postsynaptic actin cytoskeleton	│ │ └─ regulation of modification of postsynaptic actin cytoskeleton	GO:0098885
GO:0050807	I5	BP	regulation of synapse organization	│ ├─ regulation of synapse organization	GO:0050808	0.189898	0.227878	HGNC:20778;HGNC:613;HGNC:9706	TUBB;APOE;NECTIN1	TUBB;APOE;NECTIN1
GO:0098918	I6	BP	structural constituent of synapse	│ ├─ structural constituent of synapse	GO:0050808	0.0447463		HGNC:163;HGNC:29125;HGNC:2696;HGNC:6057;HGNC:7739;HGNC:7737;HGNC:2902	ACTN1;DNM3;DBNL;INA;NEFL;NEFH;DLG3	ACTN1;DNM3;DBNL;INA;NEFL;NEFH;DLG3
GO:0099181	I20	BP	structural constituent of presynapse	│ │ ├─ structural constituent of presynapse	GO:0098918
GO:0098882	I36	BP	structural constituent of active zone	│ │ │ ├─ structural constituent of active zone	GO:0099181
GO:0098699	I37	BP	structural constituent of presynaptic actin cytoskeleton	│ │ │ └─ structural constituent of presynaptic actin cytoskeleton	GO:0099181
GO:0099186	I21	BP	structural constituent of postsynapse	│ │ └─ structural constituent of postsynapse	GO:0098918	0.014401	0.0493748	HGNC:163;HGNC:29125;HGNC:2696;HGNC:6057;HGNC:7739;HGNC:7737;HGNC:2902	ACTN1;DNM3;DBNL;INA;NEFL;NEFH;DLG3	ACTN1;DNM3;DBNL;INA;NEFL;NEFH;DLG3
GO:0098973	I38	BP	structural constituent of postsynaptic actin cytoskeleton	│ │ ├─ structural constituent of postsynaptic actin cytoskeleton	GO:0099186			HGNC:2696	DBNL	DBNL
GO:0099184	I39	BP	structural constituent of postsynaptic intermediate filament cytoskeleton	│ │ ├─ structural constituent of postsynaptic intermediate filament cytoskeleton	GO:0099186	0.0199443	0.0531848	HGNC:6057;HGNC:7739;HGNC:7737	INA;NEFL;NEFH	INA;NEFL;NEFH
GO:0098879	I40	BP	structural constituent of postsynaptic specialization	│ │ ├─ structural constituent of postsynaptic specialization	GO:0099186
GO:0098919	I41	BP	structural constituent of postsynaptic density	│ │ └─ structural constituent of postsynaptic density	GO:0099186			HGNC:2902	DLG3	DLG3
GO:0150043	I7	BP	structural constituent of synapse-associated extracellular matrix	│ ├─ structural constituent of synapse-associated extracellular matrix	GO:0050808
GO:0099560	I8	BP	synapse adhesion between pre- and post-synapse	│ ├─ synapse adhesion between pre- and post-synapse	GO:0050808			HGNC:32326	IGSF9B	IGSF9B
GO:0099179	I22	BP	regulation of synaptic membrane adhesion	│ │ └─ regulation of synaptic membrane adhesion	GO:0099560
GO:0008039	I9	BP	synaptic target recognition	│ ├─ synaptic target recognition	GO:0050808
GO:0007416	I10	BP	synapse assembly	│ ├─ synapse assembly	GO:0050808	0.651364	0.679684	HGNC:244;HGNC:9861;HGNC:9612	ADD2;RAP2A;PTK2B	ADD2;RAP2A;PTK2B
GO:0099054	I23	BP	presynapse assembly	│ │ ├─ presynapse assembly	GO:0007416
GO:0051963	I24	BP	regulation of synapse assembly	│ │ ├─ regulation of synapse assembly	GO:0007416			HGNC:9861	RAP2A	RAP2A
GO:1905606	I42	BP	regulation of presynapse assembly	│ │ │ ├─ regulation of presynapse assembly	GO:0051963
GO:0150052	I43	BP	regulation of postsynapse assembly	│ │ │ └─ regulation of postsynapse assembly	GO:0051963
GO:0098698	I25	BP	postsynaptic specialization assembly	│ │ ├─ postsynaptic specialization assembly	GO:0007416			HGNC:9612	PTK2B	PTK2B
GO:0099150	I44	BP	regulation of postsynaptic specialization assembly	│ │ │ ├─ regulation of postsynaptic specialization assembly	GO:0098698
GO:0097107	I45	BP	postsynaptic density assembly	│ │ │ └─ postsynaptic density assembly	GO:0098698			HGNC:9612	PTK2B	PTK2B
GO:0099151	I48	BP	regulation of postsynaptic density assembly	│ │ │ └─ regulation of postsynaptic density assembly	GO:0097107			HGNC:9612	PTK2B	PTK2B
GO:0097104	I26	BP	postsynaptic membrane assembly	│ │ └─ postsynaptic membrane assembly	GO:0007416
GO:0098883	I11	BP	synapse disassembly	│ ├─ synapse disassembly	GO:0050808			HGNC:3388	EPHA4	EPHA4
GO:1905806	I27	BP	regulation of synapse disassembly	│ │ └─ regulation of synapse disassembly	GO:0098883			HGNC:3388	EPHA4	EPHA4
GO:0060074	I12	BP	synapse maturation	│ ├─ synapse maturation	GO:0050808	0.249876		HGNC:7739;HGNC:17447;HGNC:8011	NEFL;CLSTN1;CNTNAP1	NEFL;CLSTN1;CNTNAP1
GO:0090128	I28	BP	regulation of synapse maturation	│ │ └─ regulation of synapse maturation	GO:0060074	0.189898	0.227878	HGNC:7739;HGNC:17447;HGNC:8011	NEFL;CLSTN1;CNTNAP1	NEFL;CLSTN1;CNTNAP1
GO:0099558	I13	BP	maintenance of synapse structure	│ ├─ maintenance of synapse structure	GO:0050808			HGNC:9102;HGNC:11497	PLXNA4;SYNGAP1	PLXNA4;SYNGAP1
GO:0099559	I29	BP	maintenance of alignment of postsynaptic density and presynaptic active zone	│ │ ├─ maintenance of alignment of postsynaptic density and presynaptic active zone	GO:0099558
GO:0098880	I30	BP	maintenance of postsynaptic specialization structure	│ │ └─ maintenance of postsynaptic specialization structure	GO:0099558			HGNC:11497	SYNGAP1	SYNGAP1
GO:0099562	I46	BP	maintenance of postsynaptic density structure	│ │ └─ maintenance of postsynaptic density structure	GO:0098880
GO:0099187	I14	BP	presynaptic cytoskeleton organization	│ ├─ presynaptic cytoskeleton organization	GO:0050808			HGNC:24011	ABI2	ABI2
GO:0099140	I31	BP	presynaptic actin cytoskeleton organization	│ │ └─ presynaptic actin cytoskeleton organization	GO:0099187			HGNC:24011	ABI2	ABI2
GO:0099188	I15	BP	postsynaptic cytoskeleton organization	│ └─ postsynaptic cytoskeleton organization	GO:0050808			HGNC:24011;HGNC:2696	ABI2;DBNL	ABI2;DBNL
GO:0098974	I32	BP	postsynaptic actin cytoskeleton organization	│ ├─ postsynaptic actin cytoskeleton organization	GO:0099188			HGNC:24011;HGNC:2696	ABI2;DBNL	ABI2;DBNL
GO:0099190	I33	BP	postsynaptic spectrin-associated cytoskeleton organization	│ └─ postsynaptic spectrin-associated cytoskeleton organization	GO:0099188
SYNGO:metabolism	J1	BP	metabolism	├─ metabolism	SYNGO:synprocess
SYNGO:presyn_ATPmetabolic	J2	BP	ATP metabolic process in the presynapse	│ ├─ ATP metabolic process in the presynapse	SYNGO:metabolism
SYNGO:presyn_regulationATPmetabolic	J12	BP	regulation of ATP metabolic process in the presynapse	│ │ └─ regulation of ATP metabolic process in the presynapse	SYNGO:presyn_ATPmetabolic
SYNGO:postsyn_ATPmetabolic	J3	BP	ATP metabolic process in the postsynapse	│ ├─ ATP metabolic process in the postsynapse	SYNGO:metabolism
GO:0099546	J4	BP	protein catabolic process, modulating synaptic transmission	│ ├─ protein catabolic process, modulating synaptic transmission	SYNGO:metabolism
GO:0099574	J5	BP	regulation of protein catabolic process at synapse, modulating synaptic transmission	│ ├─ regulation of protein catabolic process at synapse, modulating synaptic transmission	SYNGO:metabolism
GO:0099576	J13	BP	regulation of protein catabolic process at postsynapse, modulating synaptic transmission	│ │ ├─ regulation of protein catabolic process at postsynapse, modulating synaptic transmission	GO:0099574
GO:0099575	J14	BP	regulation of protein catabolic process at presynapse, modulating synaptic transmission	│ │ └─ regulation of protein catabolic process at presynapse, modulating synaptic transmission	GO:0099574
GO:0099547	J6	BP	regulation of translation at synapse, modulating synaptic transmission	│ ├─ regulation of translation at synapse, modulating synaptic transmission	SYNGO:metabolism
GO:0099578	J15	BP	regulation of translation at postsynapse, modulating synaptic transmission	│ │ ├─ regulation of translation at postsynapse, modulating synaptic transmission	GO:0099547
GO:0099577	J16	BP	regulation of translation at presynapse, modulating synaptic transmission	│ │ └─ regulation of translation at presynapse, modulating synaptic transmission	GO:0099547
GO:0042135	J7	BP	neurotransmitter catabolic process	│ ├─ neurotransmitter catabolic process	SYNGO:metabolism
GO:0140246	J8	BP	protein catabolic process at synapse	│ ├─ protein catabolic process at synapse	SYNGO:metabolism
GO:0140247	J17	BP	protein catabolic process at presynapse	│ │ ├─ protein catabolic process at presynapse	GO:0140246
GO:0140251	J21	BP	regulation protein catabolic process at presynapse	│ │ │ └─ regulation protein catabolic process at presynapse	GO:0140247
GO:0140249	J18	BP	protein catabolic process at postsynapse	│ │ └─ protein catabolic process at postsynapse	GO:0140246
GO:0140252	J22	BP	regulation protein catabolic process at postsynapse	│ │ └─ regulation protein catabolic process at postsynapse	GO:0140249
GO:0042136	J9	BP	neurotransmitter biosynthetic process	│ ├─ neurotransmitter biosynthetic process	SYNGO:metabolism
GO:0140241	J10	BP	translation at synapse	│ ├─ translation at synapse	SYNGO:metabolism
GO:0140236	J19	BP	translation at presynapse	│ │ ├─ translation at presynapse	GO:0140241
GO:0140242	J20	BP	translation at postsynapse	│ │ └─ translation at postsynapse	GO:0140241
GO:0140245	J23	BP	regulation of translation at postsynapse	│ │ └─ regulation of translation at postsynapse	GO:0140242
GO:0140235	J11	BP	RNA polyadenylation at postsynapse	│ └─ RNA polyadenylation at postsynapse	SYNGO:metabolism
SYNGO:transport	K1	BP	transport	└─ transport	SYNGO:synprocess	0.405826	0.442719	HGNC:12732;HGNC:6766;HGNC:17447	WASF1;MADD;CLSTN1	WASF1;MADD;CLSTN1
GO:0008088	K2	BP	axo-dendritic transport	├─ axo-dendritic transport	SYNGO:transport			HGNC:12732	WASF1	WASF1
GO:0098930	K7	BP	axonal transport	│ ├─ axonal transport	GO:0008088
GO:0008089	K13	BP	anterograde axonal transport	│ │ ├─ anterograde axonal transport	GO:0098930
GO:0099641	K21	BP	anterograde axonal protein transport	│ │ │ ├─ anterograde axonal protein transport	GO:0008089
GO:0140231	K22	BP	anterograde axonal transport of neurotransmitter receptor complex	│ │ │ └─ anterograde axonal transport of neurotransmitter receptor complex	GO:0008089
GO:0099088	K14	BP	axonal transport of messenger ribonucleoprotein complex	│ │ └─ axonal transport of messenger ribonucleoprotein complex	GO:0098930
GO:0098935	K8	BP	dendritic transport	│ └─ dendritic transport	GO:0008088			HGNC:12732	WASF1	WASF1
GO:0098937	K15	BP	anterograde dendritic transport	│ ├─ anterograde dendritic transport	GO:0098935
GO:0098971	K23	BP	anterograde dendritic transport of neurotransmitter receptor complex	│ │ └─ anterograde dendritic transport of neurotransmitter receptor complex	GO:0098937
GO:0098939	K16	BP	dendritic transport of mitochondrion	│ ├─ dendritic transport of mitochondrion	GO:0098935			HGNC:12732	WASF1	WASF1
GO:0098961	K17	BP	dendritic transport of ribonucleoprotein complex	│ └─ dendritic transport of ribonucleoprotein complex	GO:0098935
GO:0098963	K24	BP	dendritic transport of messenger ribonucleoprotein complex	│ └─ dendritic transport of messenger ribonucleoprotein complex	GO:0098961
GO:0098964	K27	BP	anterograde dendritic transport of messenger ribonucleoprotein complex	│ └─ anterograde dendritic transport of messenger ribonucleoprotein complex	GO:0098963
GO:0099514	K3	BP	synaptic vesicle cytoskeletal transport	├─ synaptic vesicle cytoskeletal transport	SYNGO:transport			HGNC:6766	MADD	MADD
GO:0099517	K9	BP	synaptic vesicle transport along microtubule	│ └─ synaptic vesicle transport along microtubule	GO:0099514			HGNC:6766	MADD	MADD
GO:0048490	K18	BP	anterograde synaptic vesicle transport	│ └─ anterograde synaptic vesicle transport	GO:0099517			HGNC:6766	MADD	MADD
GO:1903742	K25	BP	regulation of anterograde synaptic vesicle transport	│ └─ regulation of anterograde synaptic vesicle transport	GO:0048490
GO:0099090	K4	BP	synaptic vesicle recycling via endosome	├─ synaptic vesicle recycling via endosome	SYNGO:transport
GO:0099158	K10	BP	regulation of recycling endosome localization within postsynapse	│ └─ regulation of recycling endosome localization within postsynapse	GO:0099090
GO:0099089	K5	BP	establishment of endoplasmic reticulum localization to postsynapse	├─ establishment of endoplasmic reticulum localization to postsynapse	SYNGO:transport
GO:0099637	K6	BP	neurotransmitter receptor transport	└─ neurotransmitter receptor transport	SYNGO:transport			HGNC:17447	CLSTN1	CLSTN1
GO:0098877	K11	BP	neurotransmitter receptor transport to plasma membrane	├─ neurotransmitter receptor transport to plasma membrane	GO:0099637			HGNC:17447	CLSTN1	CLSTN1
GO:0098969	K19	BP	neurotransmitter receptor transport to postsynaptic membrane	│ ├─ neurotransmitter receptor transport to postsynaptic membrane	GO:0098877			HGNC:17447	CLSTN1	CLSTN1
GO:0099639	K20	BP	neurotransmitter receptor transport, endosome to plasma membrane	│ └─ neurotransmitter receptor transport, endosome to plasma membrane	GO:0098877
GO:0098887	K26	BP	neurotransmitter receptor transport, endosome to postsynaptic membrane	│ └─ neurotransmitter receptor transport, endosome to postsynaptic membrane	GO:0099639
GO:0099152	K28	BP	regulation of neurotransmitter receptor transport, endosome to postsynaptic membrane	│ └─ regulation of neurotransmitter receptor transport, endosome to postsynaptic membrane	GO:0098887
GO:0098943	K12	BP	neurotransmitter receptor transport, postsynaptic endosome to lysosome	└─ neurotransmitter receptor transport, postsynaptic endosome to lysosome	GO:0099637
