# Supplementary material for: Distinct cell type-specific protein signatures in GRN and MAPT genetic subtypes of frontotemporal dementia
Source: Acta Neuropathol Commun. 2022 Jul 7;10:100. doi: 10.1186/s40478-022-01387-8 (PMC9261008; doi:10.1186/s40478-022-01387-8)
Supplement: Supplementary file 14 — Additional file 14 Lists of significant GO enrichment analysis results for proteins differentially expressed in both temporal cortical FTD-MAPT vs NDC and AD vs NDC. GO enrichment analysis was performed for proteins differentially expressed at q < 0.05 in both temporal cortical AD and FTD-MAPT vs NDC, and for proteins that are only differentially expressed (q < 0.05) in temporal cortical FTD-MAPT vs NDC. Differentially expressed proteins are divided into lower and higher expressed proteins. For every GO term, the corresponding GO group is listed, as well as whether the GO term is considered to be a ‘Best Per Parent’ term. [file 40478_2022_1387_MOESM14_ESM.xlsx]

## Sheet: Info
Distinct cell type-specific protein signatures in GRN and MAPT genetic subtypes of frontotemporal dementia
Additional File 14 Lists of significant GO enrichment analysis results for proteins differentially expressed (at q < 0.05) in both temporal cortical AD and FTD-MAPT vs NDC, and for proteins that are only differentially expressed in temporal cortical FTD-MAPT vs NDC. Differentially expressed proteins are divided into lower and higher expressed proteins. For every GO term, the corresponding GO grou…

## Sheet: both FTD-MAPT&AD high expr prot
p-value	NumberProteins	GOtype	GOterm group	GOtermID	GOterm	tdepth	Proteinlist	GOGroup	BestPerParent?
0.0442	63	GO:0005576	CC	4	extracellular region	1	VIM,CD44,TNC,PYGM,WDR1,ENO1,FTL,BLVRB,SNAP23,PHGDH,EZR,MAPK1,PSME2,PYGB,COTL1,HSPB1,AK1,LTA4H,TPI1,DARS,PADI2,AKR1A1,HNRNPA2B1,AHNAK,PAICS,PGLS,RAN,GSTM3,ANXA1,PSAT1,RDX,ARL3,ATIC,IQGAP1,ARHGDIA,ALDH9A1,ILF2,ALDH1L1,MSN,RSU1,ITGB1,DDAH1,CSRP1,CBR1,PDXK,CSTB,GYG1,BDH2,CMBL,CRYL1,PPIB,VAMP5,PGAM1,RUVBL1,PLCD1,AGRN,PPIA,FLNA,ADH5,APRT,GSTM2,CLIC1,DDAH2	Extracellular	No
0.0456	60	GO:0044421	CC	4	extracellular region part	2	VIM,CD44,TNC,PYGM,WDR1,ENO1,FTL,BLVRB,SNAP23,PHGDH,EZR,PSME2,PYGB,COTL1,HSPB1,AK1,LTA4H,TPI1,DARS,PADI2,AKR1A1,HNRNPA2B1,AHNAK,PAICS,PGLS,RAN,GSTM3,ANXA1,PSAT1,RDX,ARL3,ATIC,IQGAP1,ARHGDIA,ALDH9A1,ALDH1L1,MSN,RSU1,ITGB1,DDAH1,CSRP1,CBR1,PDXK,CSTB,BDH2,CMBL,CRYL1,PPIB,VAMP5,PGAM1,RUVBL1,PLCD1,AGRN,PPIA,FLNA,ADH5,APRT,GSTM2,CLIC1,DDAH2	Extracellular	No
0.0161	60	GO:0005615	CC	4	extracellular space	3	VIM,CD44,TNC,PYGM,WDR1,ENO1,FTL,BLVRB,SNAP23,PHGDH,EZR,PSME2,PYGB,COTL1,HSPB1,AK1,LTA4H,TPI1,DARS,PADI2,AKR1A1,HNRNPA2B1,AHNAK,PAICS,PGLS,RAN,GSTM3,ANXA1,PSAT1,RDX,ARL3,ATIC,IQGAP1,ARHGDIA,ALDH9A1,ALDH1L1,MSN,RSU1,ITGB1,DDAH1,CSRP1,CBR1,PDXK,CSTB,BDH2,CMBL,CRYL1,PPIB,VAMP5,PGAM1,RUVBL1,PLCD1,AGRN,PPIA,FLNA,ADH5,APRT,GSTM2,CLIC1,DDAH2	Extracellular	Yes
0.00854	59	GO:0043230	CC	4	extracellular organelle	1	VIM,CD44,PYGM,WDR1,ENO1,FTL,BLVRB,SNAP23,PHGDH,EZR,PSME2,PYGB,COTL1,HSPB1,AK1,LTA4H,TPI1,DARS,PADI2,AKR1A1,HNRNPA2B1,AHNAK,PAICS,PGLS,RAN,GSTM3,ANXA1,PSAT1,RDX,ARL3,ATIC,IQGAP1,ARHGDIA,ALDH9A1,ALDH1L1,MSN,RSU1,ITGB1,DDAH1,CSRP1,CBR1,PDXK,CSTB,BDH2,CMBL,CRYL1,PPIB,VAMP5,PGAM1,RUVBL1,PLCD1,AGRN,PPIA,FLNA,ADH5,APRT,GSTM2,CLIC1,DDAH2	Extracellular	Yes
0.00854	59	GO:1903561	CC	4	extracellular vesicle	1	VIM,CD44,PYGM,WDR1,ENO1,FTL,BLVRB,SNAP23,PHGDH,EZR,PSME2,PYGB,COTL1,HSPB1,AK1,LTA4H,TPI1,DARS,PADI2,AKR1A1,HNRNPA2B1,AHNAK,PAICS,PGLS,RAN,GSTM3,ANXA1,PSAT1,RDX,ARL3,ATIC,IQGAP1,ARHGDIA,ALDH9A1,ALDH1L1,MSN,RSU1,ITGB1,DDAH1,CSRP1,CBR1,PDXK,CSTB,BDH2,CMBL,CRYL1,PPIB,VAMP5,PGAM1,RUVBL1,PLCD1,AGRN,PPIA,FLNA,ADH5,APRT,GSTM2,CLIC1,DDAH2	Extracellular	No
0.00644	59	GO:0070062	CC	4	extracellular exosome	2	VIM,CD44,PYGM,WDR1,ENO1,FTL,BLVRB,SNAP23,PHGDH,EZR,PSME2,PYGB,COTL1,HSPB1,AK1,LTA4H,TPI1,DARS,PADI2,AKR1A1,HNRNPA2B1,AHNAK,PAICS,PGLS,RAN,GSTM3,ANXA1,PSAT1,RDX,ARL3,ATIC,IQGAP1,ARHGDIA,ALDH9A1,ALDH1L1,MSN,RSU1,ITGB1,DDAH1,CSRP1,CBR1,PDXK,CSTB,BDH2,CMBL,CRYL1,PPIB,VAMP5,PGAM1,RUVBL1,PLCD1,AGRN,PPIA,FLNA,ADH5,APRT,GSTM2,CLIC1,DDAH2	Extracellular	Yes

## Sheet: both FTD-MAPT&AD low expr prot
p-value	NumberProteins	GOtype	GOterm group	GOtermID	GOterm	tdepth	Proteinlist	GOGroup	BestPerParent?
0.0344	11	GO:0010721	BP	4	negative regulation of cell development	1	RUFY3,STX1B,RTN4,EPHA4,ARHGEF2,APOE,ACTN4,PPP3CA,THY1,SYNGAP1,DNM3	Neuron	Yes
0.0394	17	GO:0045664	BP	2	regulation of neuron differentiation	1	RUFY3,STX1B,NCS1,RTN4,EPHA4,ARHGEF2,PTK2B,RAP2A,APOE,OLFM1,MAP1B,PPP3CA,THY1,AP2A1,SYNGAP1,DNM3,PLXNA4	Neuron	Yes
0.0493	16	GO:0010975	BP	2	regulation of neuron projection development	1	RUFY3,STX1B,NCS1,RTN4,EPHA4,PTK2B,RAP2A,APOE,OLFM1,MAP1B,PPP3CA,THY1,AP2A1,SYNGAP1,DNM3,PLXNA4	Neuron	Yes
0.0314	9	GO:0010977	BP	2	negative regulation of neuron projection development	1	RUFY3,STX1B,RTN4,EPHA4,APOE,PPP3CA,THY1,SYNGAP1,DNM3	Neuron	Yes
0.0149	5	GO:0006086	BP	6	acetyl-CoA biosynthetic process from pyruvate	1	PDK2,PDK3,PDHX,PDHA1,PDHB	Rest	Yes
0.0113	21	GO:0099536	BP	3	synaptic signaling	1	IGSF9B,STX1B,SYNGR1,STX1A,EPHA4,GRIA2,PTK2B,GRIA3,VGF,APOE,KRAS,PPP3CA,SH3GL1,SLC24A2,PRRT2,CPLX1,PRKCE,SYNPO,SYN3,PIP5K1C,SYNGAP1	Synapse	No
0.0113	21	GO:0099537	BP	3	trans-synaptic signaling	2	IGSF9B,STX1B,SYNGR1,STX1A,EPHA4,GRIA2,PTK2B,GRIA3,VGF,APOE,KRAS,PPP3CA,SH3GL1,SLC24A2,PRRT2,CPLX1,PRKCE,SYNPO,SYN3,PIP5K1C,SYNGAP1	Synapse	No
0.0101	21	GO:0098916	BP	3	anterograde trans-synaptic signaling	3	IGSF9B,STX1B,SYNGR1,STX1A,EPHA4,GRIA2,PTK2B,GRIA3,VGF,APOE,KRAS,PPP3CA,SH3GL1,SLC24A2,PRRT2,CPLX1,PRKCE,SYNPO,SYN3,PIP5K1C,SYNGAP1	Synapse	No
0.0101	21	GO:0007268	BP	3	chemical synaptic transmission	4	IGSF9B,STX1B,SYNGR1,STX1A,EPHA4,GRIA2,PTK2B,GRIA3,VGF,APOE,KRAS,PPP3CA,SH3GL1,SLC24A2,PRRT2,CPLX1,PRKCE,SYNPO,SYN3,PIP5K1C,SYNGAP1	Synapse	Yes
0.00188	17	GO:0099177	BP	3	regulation of trans-synaptic signaling	3	IGSF9B,STX1B,SYNGR1,STX1A,EPHA4,PTK2B,VGF,APOE,KRAS,PPP3CA,SH3GL1,SLC24A2,PRRT2,PRKCE,SYNPO,SYN3,SYNGAP1	Synapse	No
0.00161	17	GO:0050804	BP	3	modulation of chemical synaptic transmission	4	IGSF9B,STX1B,SYNGR1,STX1A,EPHA4,PTK2B,VGF,APOE,KRAS,PPP3CA,SH3GL1,SLC24A2,PRRT2,PRKCE,SYNPO,SYN3,SYNGAP1	Synapse	Yes
0.00764	8	GO:0099565	BP	3	chemical synaptic transmission, postsynaptic	1	IGSF9B,STX1B,STX1A,GRIA2,PTK2B,GRIA3,PPP3CA,SH3GL1	Synapse	Yes
0.0155	8	GO:0060078	BP	3	regulation of postsynaptic membrane potential	1	IGSF9B,STX1B,STX1A,GRIA2,PTK2B,GRIA3,PPP3CA,SH3GL1	Synapse	No
0.0418	7	GO:0060079	BP	3	excitatory postsynaptic potential	2	STX1B,STX1A,GRIA2,PTK2B,GRIA3,PPP3CA,SH3GL1	Synapse	Yes
0.0295	32	GO:0043005	CC	1	neuron projection	1	RUFY3,ROGDI,ADGRL1,ACTN2,IGSF9B,EPB41L3,STX1B,AP3B2,TUBB4A,STX1A,NCS1,NECTIN1,SLC30A3,RTN4,EPHA4,ARHGEF2,GRIA2,PTK2B,APOE,ACTN4,OLFM1,MAP1B,PPP3CA,SLC4A10,HNMT,QDPR,THY1,PRRT2,CPLX1,SYNPO,SYNGAP1,DNM3	Neuron	No
0.0125	21	GO:0097447	CC	1	dendritic tree	2	RUFY3,ROGDI,ACTN2,IGSF9B,NCS1,NECTIN1,RTN4,EPHA4,ARHGEF2,GRIA2,PTK2B,APOE,MAP1B,PPP3CA,SLC4A10,THY1,PRRT2,CPLX1,SYNPO,SYNGAP1,DNM3	Neuron	Yes
0.0125	21	GO:0030425	CC	1	dendrite	2	RUFY3,ROGDI,ACTN2,IGSF9B,NCS1,NECTIN1,RTN4,EPHA4,ARHGEF2,GRIA2,PTK2B,APOE,MAP1B,PPP3CA,SLC4A10,THY1,PRRT2,CPLX1,SYNPO,SYNGAP1,DNM3	Neuron	Yes
0.000805	31	GO:0045202	CC	5	synapse	1	ROGDI,ADGRL1,ACTN2,IGSF9B,EPB41L3,STX1B,SYNGR1,STX1A,NCS1,NECTIN1,PHACTR1,SLC30A3,RTN4,EPHA4,ARHGEF2,DNAJC6,GRIA2,PTK2B,GRIA3,OLFM1,MAP1B,PPP3CA,SH3GL1,ATP2B2,PRRT2,CPLX1,SYNPO,SYN3,PIP5K1C,SYNGAP1,DNM3	Synapse	No
0.000406	16	GO:0098984	CC	5	neuron to neuron synapse	2	IGSF9B,EPB41L3,STX1A,NCS1,RTN4,EPHA4,ARHGEF2,DNAJC6,PTK2B,MAP1B,SH3GL1,PRRT2,SYNPO,SYN3,SYNGAP1,DNM3	Synapse	No
0.00202	15	GO:0032279	CC	5	asymmetric synapse	3	IGSF9B,EPB41L3,STX1A,NCS1,RTN4,EPHA4,ARHGEF2,DNAJC6,PTK2B,MAP1B,PRRT2,SYNPO,SYN3,SYNGAP1,DNM3	Synapse	Yes
0.00307	27	GO:0044456	CC	5	synapse part	1	ROGDI,ADGRL1,ACTN2,IGSF9B,EPB41L3,STX1B,SYNGR1,STX1A,NCS1,NECTIN1,SLC30A3,RTN4,EPHA4,ARHGEF2,DNAJC6,GRIA2,PTK2B,GRIA3,MAP1B,PPP3CA,PRRT2,CPLX1,SYNPO,SYN3,PIP5K1C,SYNGAP1,DNM3	Synapse	No
0.00981	19	GO:0098794	CC	5	postsynapse	2	ACTN2,IGSF9B,EPB41L3,STX1A,NCS1,RTN4,EPHA4,ARHGEF2,DNAJC6,GRIA2,PTK2B,GRIA3,MAP1B,PPP3CA,PRRT2,SYNPO,SYN3,SYNGAP1,DNM3	Synapse	Yes
0.00202	15	GO:0099572	CC	5	postsynaptic specialization	1	IGSF9B,EPB41L3,STX1A,NCS1,RTN4,EPHA4,ARHGEF2,DNAJC6,PTK2B,MAP1B,PRRT2,SYNPO,SYN3,SYNGAP1,DNM3	Synapse	No
0.00202	15	GO:0014069	CC	5	postsynaptic density	2	IGSF9B,EPB41L3,STX1A,NCS1,RTN4,EPHA4,ARHGEF2,DNAJC6,PTK2B,MAP1B,PRRT2,SYNPO,SYN3,SYNGAP1,DNM3	Synapse	Yes
0.0476	13	GO:0097060	CC	5	synaptic membrane	1	ROGDI,ADGRL1,IGSF9B,STX1B,STX1A,NCS1,NECTIN1,EPHA4,GRIA2,GRIA3,PRRT2,SYNPO,DNM3	Synapse	Yes
0.0412	33	GO:0030054	CC	7	cell junction	1	EHD3,RUFY3,ROGDI,ADGRL1,ACTN1,ACTN2,IGSF9B,EPB41L3,SYNGR1,STX1A,NCS1,NECTIN1,PHACTR1,SLC30A3,EPHA4,ARHGEF2,GRIA2,PTK2B,GRIA3,ACTN4,OLFM1,MAP1B,KRAS,PPP3CA,SH3GL1,ATP1B1,ARHGAP26,THY1,ATP2B2,PRRT2,SYNPO,SYN3,PIP5K1C	Rest	Yes

## Sheet: only FTD-MAPT higher expr prot
p-value	NumberProteins	GOtype	GOterm group	GOtermID	GOterm	tdepth	Proteinlist	GOGroup	BestPerParent?
0.0249	8	GO:1903825	BP	14	organic acid transmembrane transport	1	ATP1A2,SLC1A3,SLC25A1,CPT1A,SLC1A4,LRRC8A,SLC16A1,SLC3A2	Rest	Yes
0.0249	8	GO:1905039	BP	14	carboxylic acid transmembrane transport	1	ATP1A2,SLC1A3,SLC25A1,CPT1A,SLC1A4,LRRC8A,SLC16A1,SLC3A2	Rest	Yes
0.0469	21	GO:0016071	BP	4	mRNA metabolic process	1	PTBP1,CLNS1A,HNRNPH3,SNRPD3,EIF3E,RPS19,DDX5,SRSF3,RPL24,SRSF7,SRSF1,PPIL1,EIF4A3,HNRNPU,PRKCA,RPL30,SNRPD1,HNRNPA3,PRPF8,RPL35A,SF3B3	RNA	Yes
0.013	15	GO:0008380	BP	4	RNA splicing	1	PTBP1,CLNS1A,HNRNPH3,SNRPD3,DDX5,SRSF3,SRSF7,SRSF1,PPIL1,EIF4A3,HNRNPU,SNRPD1,HNRNPA3,PRPF8,SF3B3	RNA	No
0.00117	15	GO:0000375	BP	4	RNA splicing, via transesterification reactions	2	PTBP1,CLNS1A,HNRNPH3,SNRPD3,DDX5,SRSF3,SRSF7,SRSF1,PPIL1,EIF4A3,HNRNPU,SNRPD1,HNRNPA3,PRPF8,SF3B3	RNA	No
0.000911	15	GO:0000377	BP	4	RNA splicing, via transesterification reactions with bulged adenosine as nucleophile	3	PTBP1,CLNS1A,HNRNPH3,SNRPD3,DDX5,SRSF3,SRSF7,SRSF1,PPIL1,EIF4A3,HNRNPU,SNRPD1,HNRNPA3,PRPF8,SF3B3	RNA	Yes
0.00878	15	GO:0006397	BP	4	mRNA processing	1	PTBP1,CLNS1A,HNRNPH3,SNRPD3,DDX5,SRSF3,SRSF7,SRSF1,PPIL1,EIF4A3,HNRNPU,SNRPD1,HNRNPA3,PRPF8,SF3B3	RNA	No
0.000911	15	GO:0000398	BP	4	mRNA splicing, via spliceosome	2	PTBP1,CLNS1A,HNRNPH3,SNRPD3,DDX5,SRSF3,SRSF7,SRSF1,PPIL1,EIF4A3,HNRNPU,SNRPD1,HNRNPA3,PRPF8,SF3B3	RNA	Yes
0.0198	14	GO:0045944	BP	9	positive regulation of transcription by RNA polymerase II	1	NAMPT,CD81,PARP1,EGFR,CASK,ERLIN2,PFKM,HNRNPU,CTNNB1,ARF4,RUVBL2,HMGB1,MYO6,PRKDC	RNA	Yes
0.000471	12	GO:0005681	CC	8	spliceosomal complex	1	HNRNPH3,SNRPD3,RHEB,DDX5,SRSF1,PPIL1,EIF4A3,HNRNPU,SNRPD1,HNRNPA3,PRPF8,SF3B3	RNA	No
0.0019	10	GO:0071013	CC	8	catalytic step 2 spliceosome	2	SNRPD3,DDX5,SRSF1,PPIL1,EIF4A3,HNRNPU,SNRPD1,HNRNPA3,PRPF8,SF3B3	RNA	Yes

## Sheet: only FTD-MAPT lower expr prot
p-value	NumberProteins	GOtype	GOterm group	GOtermID	GOterm	tdepth	Proteinlist	GOGroup	BestPerParent?
0.0437	53	GO:0007399	BP	3	nervous system development	1	MARK4,CD9,GPM6B,SIRT2,MARK2,CAMSAP3,DLG3,NEFH,PLLP,NEFM,MAG,LGI1,CNTNAP1,WASF1,ADAM23,STRN,HPCAL4,GDA,PLP1,CPNE5,OMG,TIMM8A,HAPLN2,CHL1,DBNL,SCN2A,BIN1,SNCA,PIK3R1,INA,SCN2B,ANK3,SYNJ1,IGSF8,NFASC,JAM3,MAP2K1,MAP6,CLSTN1,NEGR1,CNP,PITPNA,KCNA2,MAP6D1,PLCB1,CNTN2,RTN4RL2,APOD,MBP,ATL1,BAG6,MOG,NEFL	Neuron	No
0.00402	11	GO:0007272	BP	3	ensheathment of neurons	2	CD9,SIRT2,PLLP,MAG,CNTNAP1,PLP1,SCN2A,NFASC,JAM3,CNTN2,MBP	Neuron	No
0.00402	11	GO:0008366	BP	3	axon ensheathment	3	CD9,SIRT2,PLLP,MAG,CNTNAP1,PLP1,SCN2A,NFASC,JAM3,CNTN2,MBP	Neuron	No
0.00402	11	GO:0042552	BP	3	myelination	4	CD9,SIRT2,PLLP,MAG,CNTNAP1,PLP1,SCN2A,NFASC,JAM3,CNTN2,MBP	Neuron	Yes
0.00306	8	GO:0015696	BP	5	ammonium transport	1	SYT7,GPM6B,SLC12A2,SLC44A1,SNX4,SNCA,SNCG,KCNA2	Ion transport	Yes
0.0207	5	GO:0043218	CC	4	compact myelin	1	SIRT2,PLLP,MAG,JAM3,MBP	Neuron	Yes
0.000269	12	GO:0044304	CC	1	main axon	1	SIRT2,KCNAB2,MAG,CNTNAP1,SCN2A,BIN1,ANK3,NFASC,MAP1A,KCNA2,CNTN2,MBP	Axon	No
0.00368	5	GO:0033268	CC	1	node of Ranvier	2	SCN2A,BIN1,ANK3,NFASC,CNTN2	Axon	Yes
0.0207	5	GO:0033270	CC	1	paranode region of axon	1	SIRT2,MAG,CNTNAP1,SCN2A,NFASC	Axon	Yes
